# Supplementary material for: Child Mortality Estimation: A Comparison of UN IGME and IHME Estimates of Levels and Trends in Under-Five Mortality Rates and Deaths
Source: PubMed Central journal article supplement (PMC3429386; doi:10.1371/journal.pmed.1001288), 2012-08-28

# Afghanistan

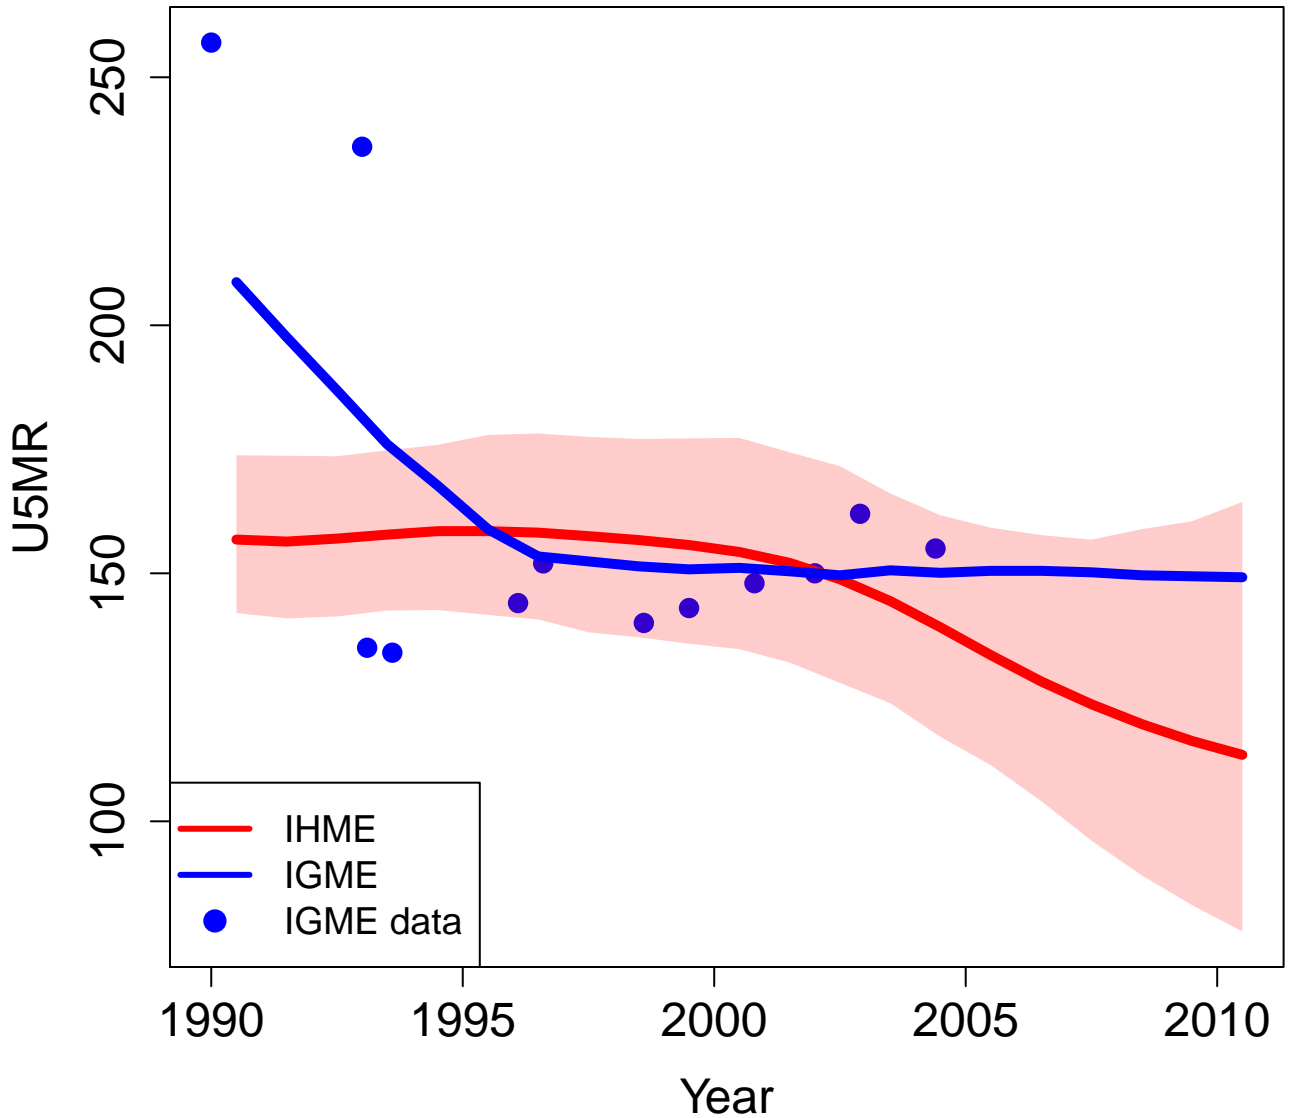

# Albania

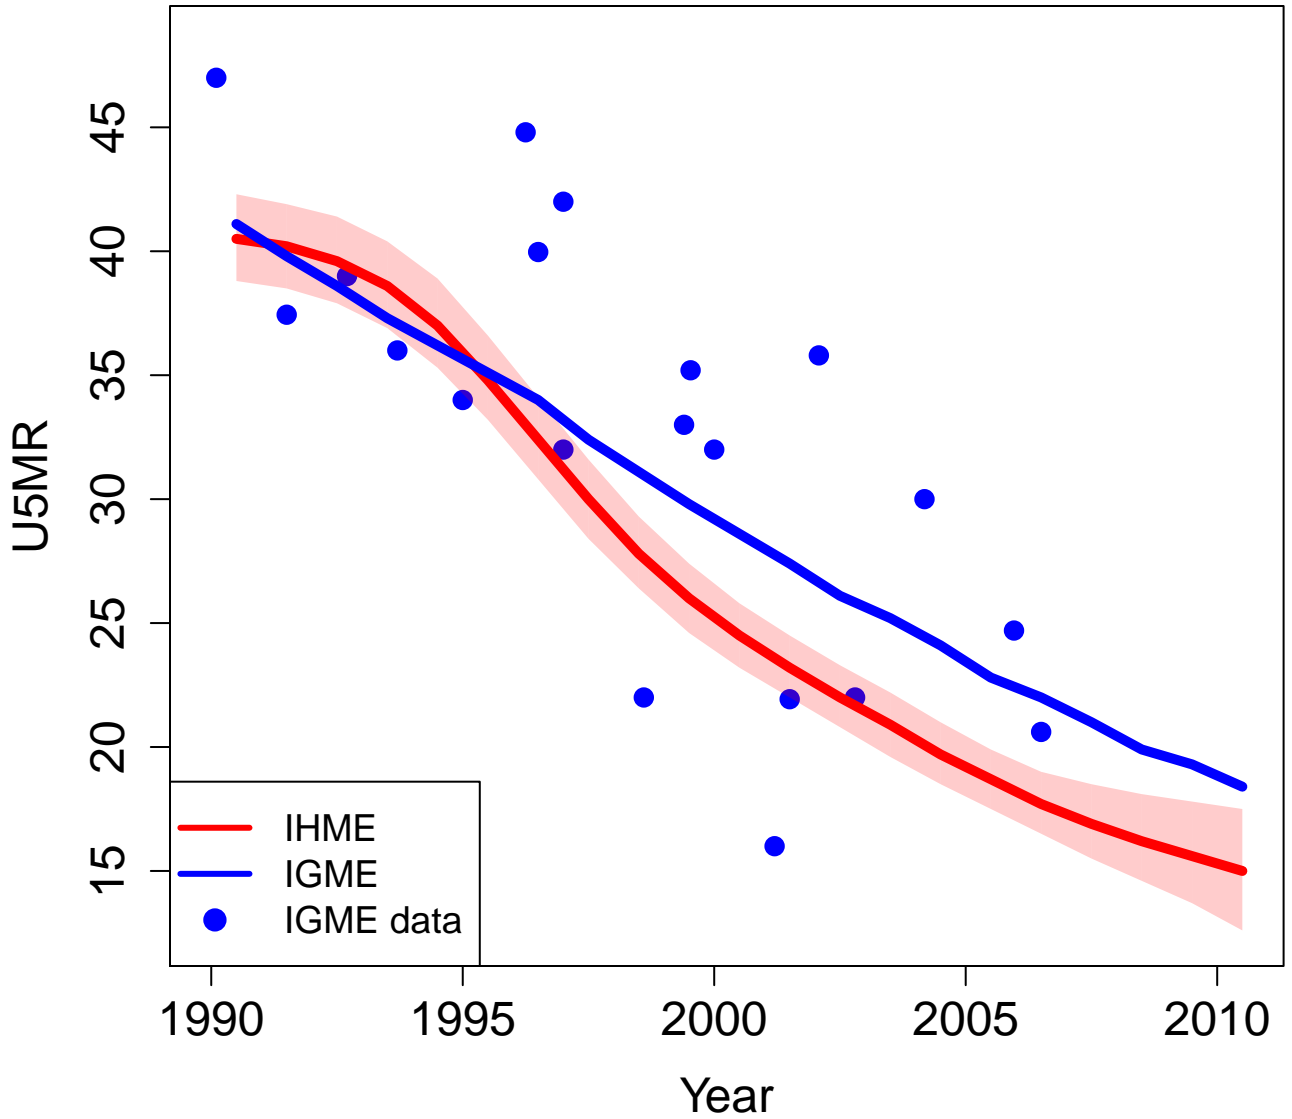

# Algeria

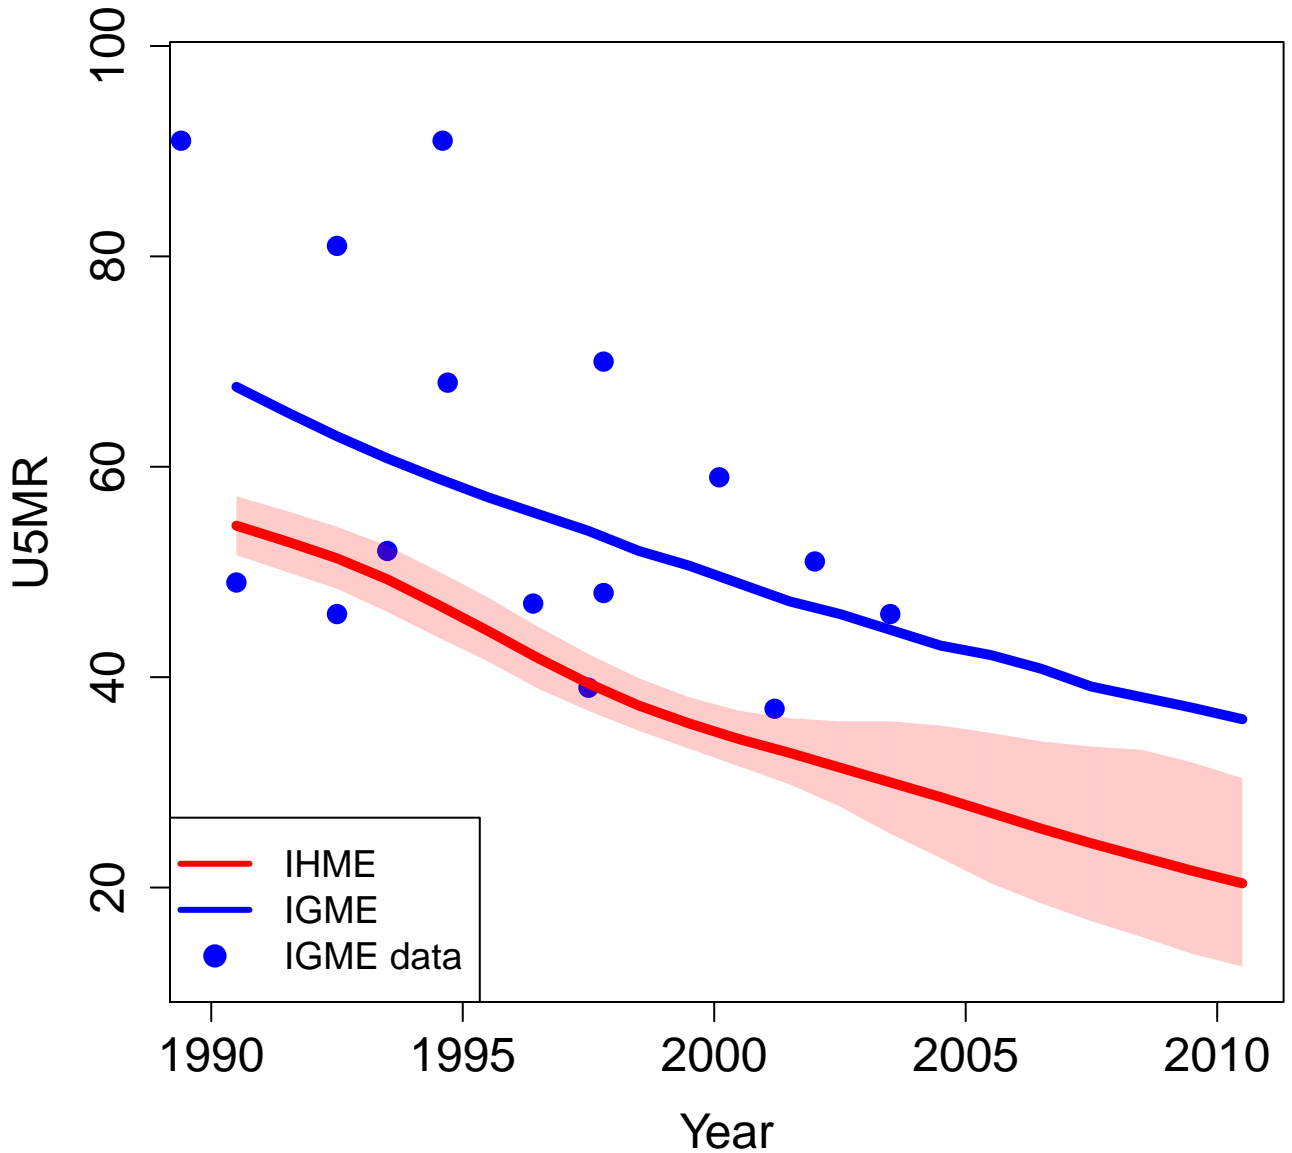

# Andorra

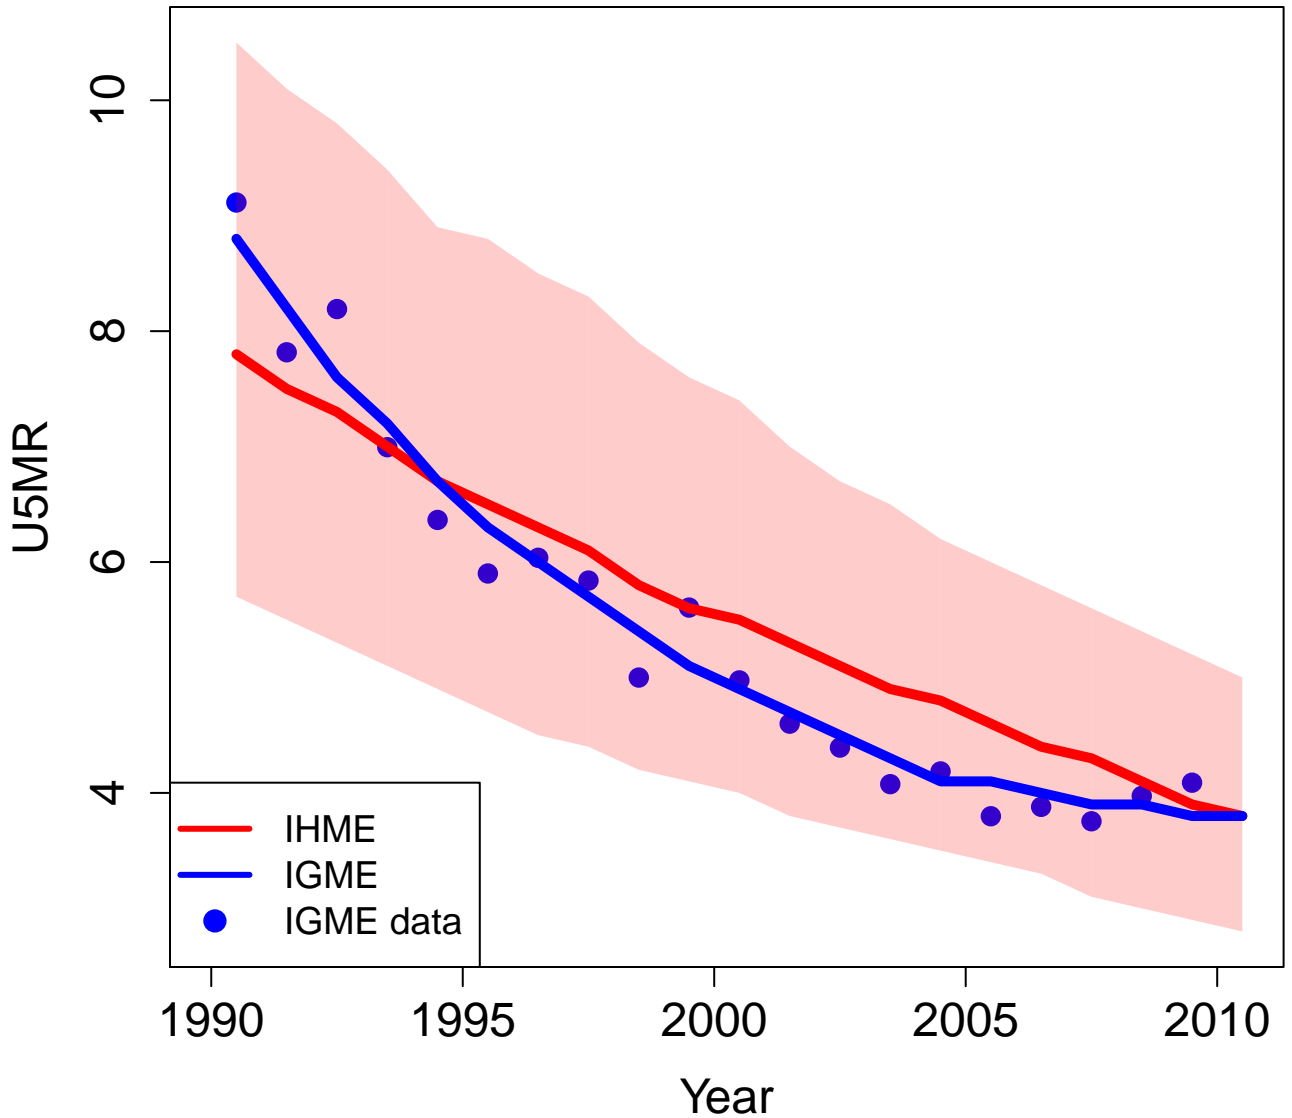

# Angola

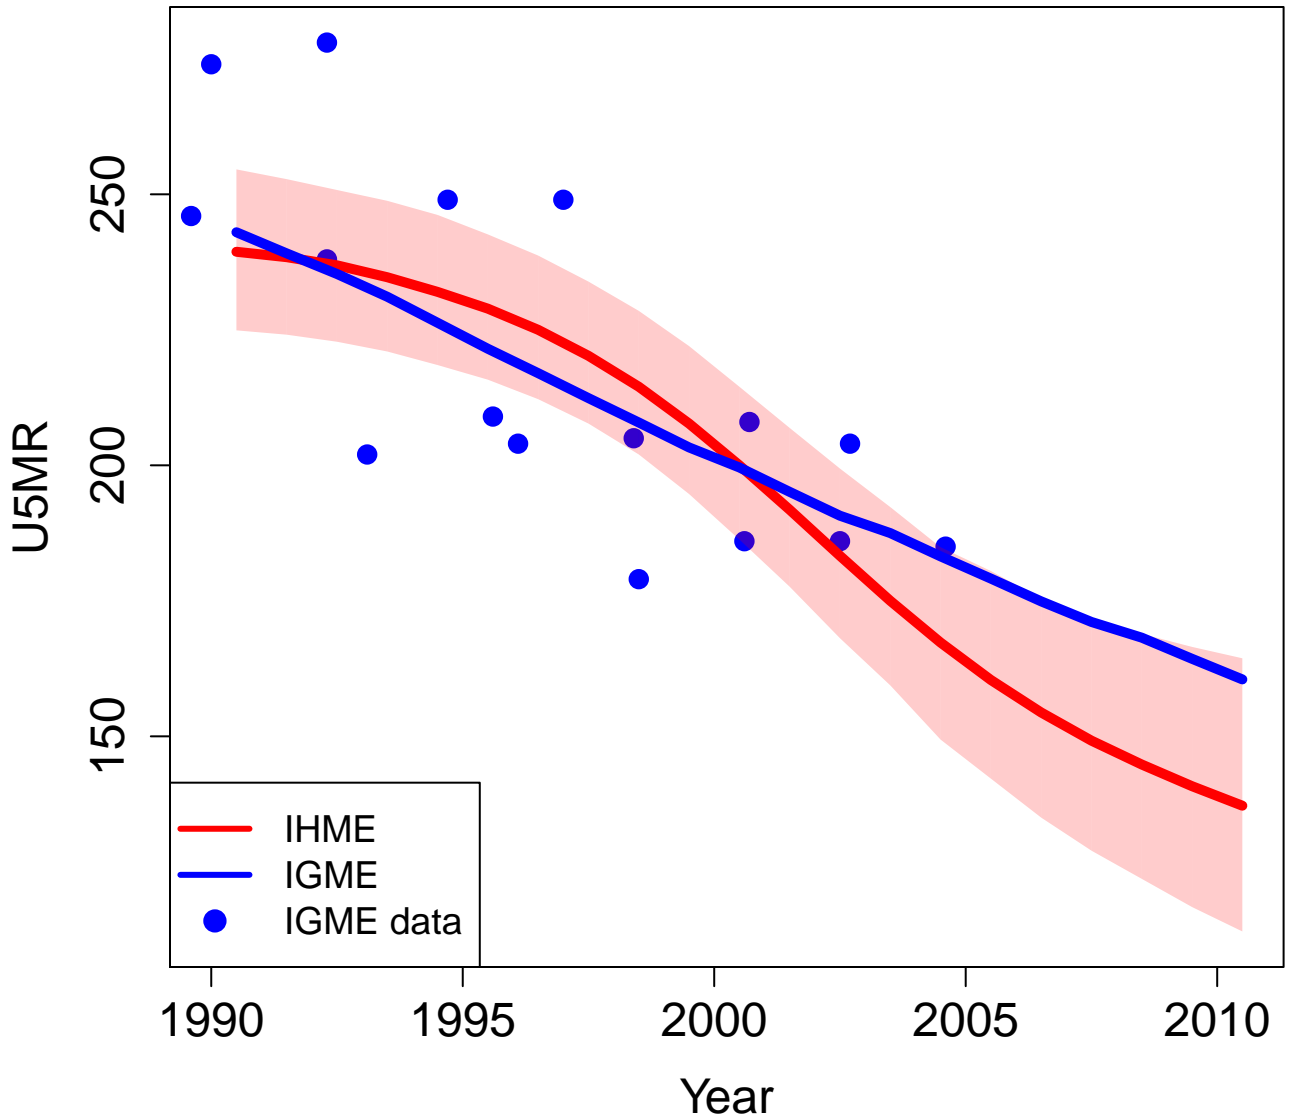

# Antigua and B.

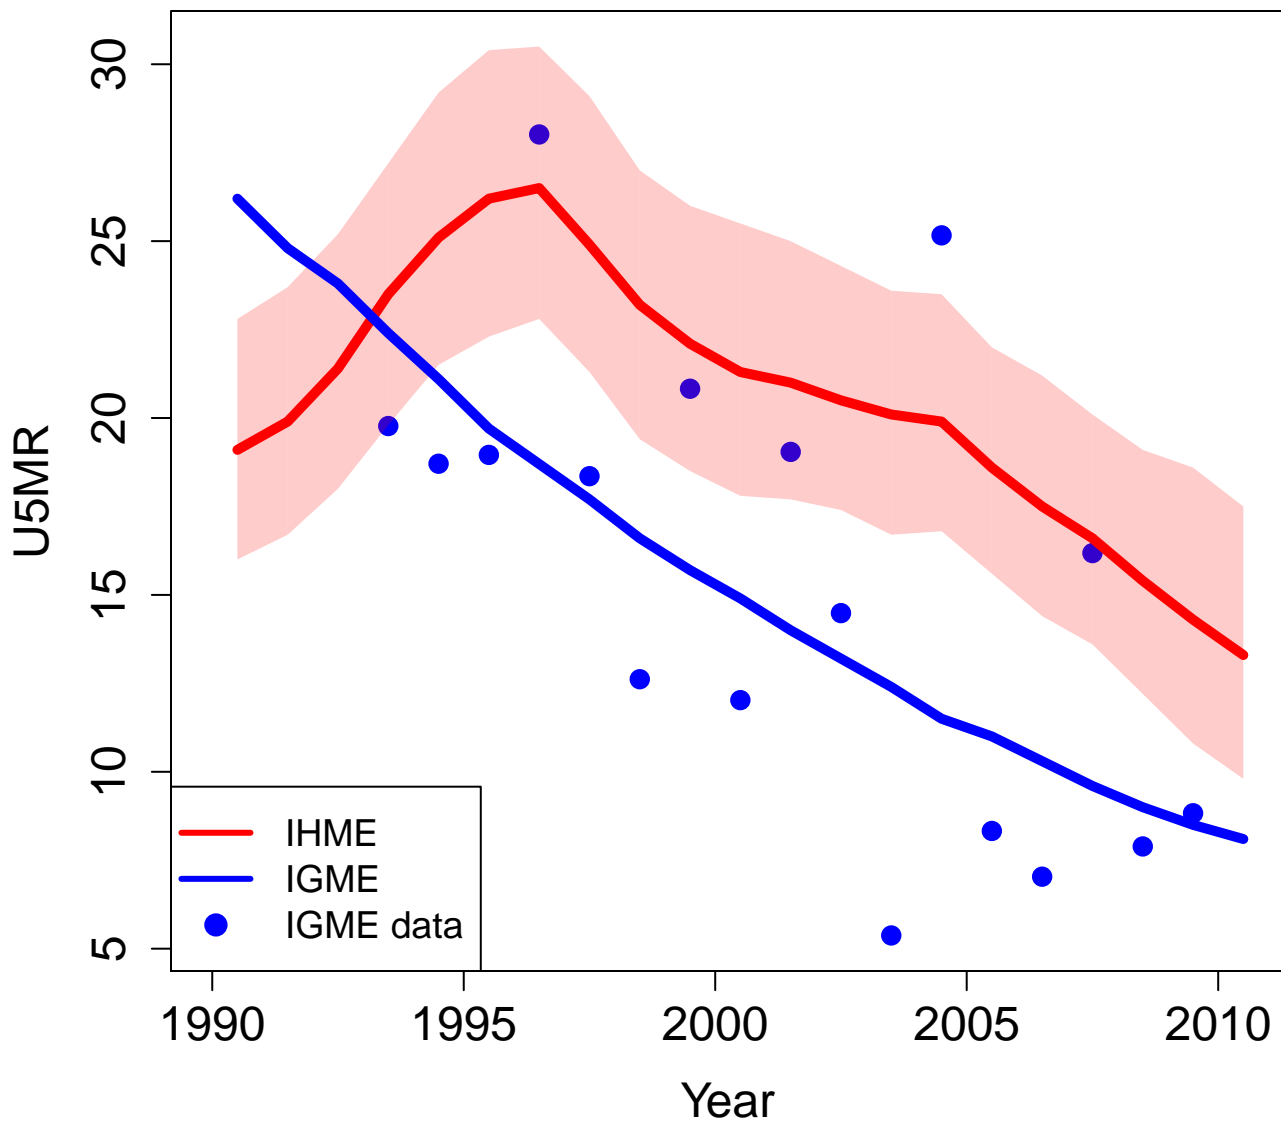

# Argentina

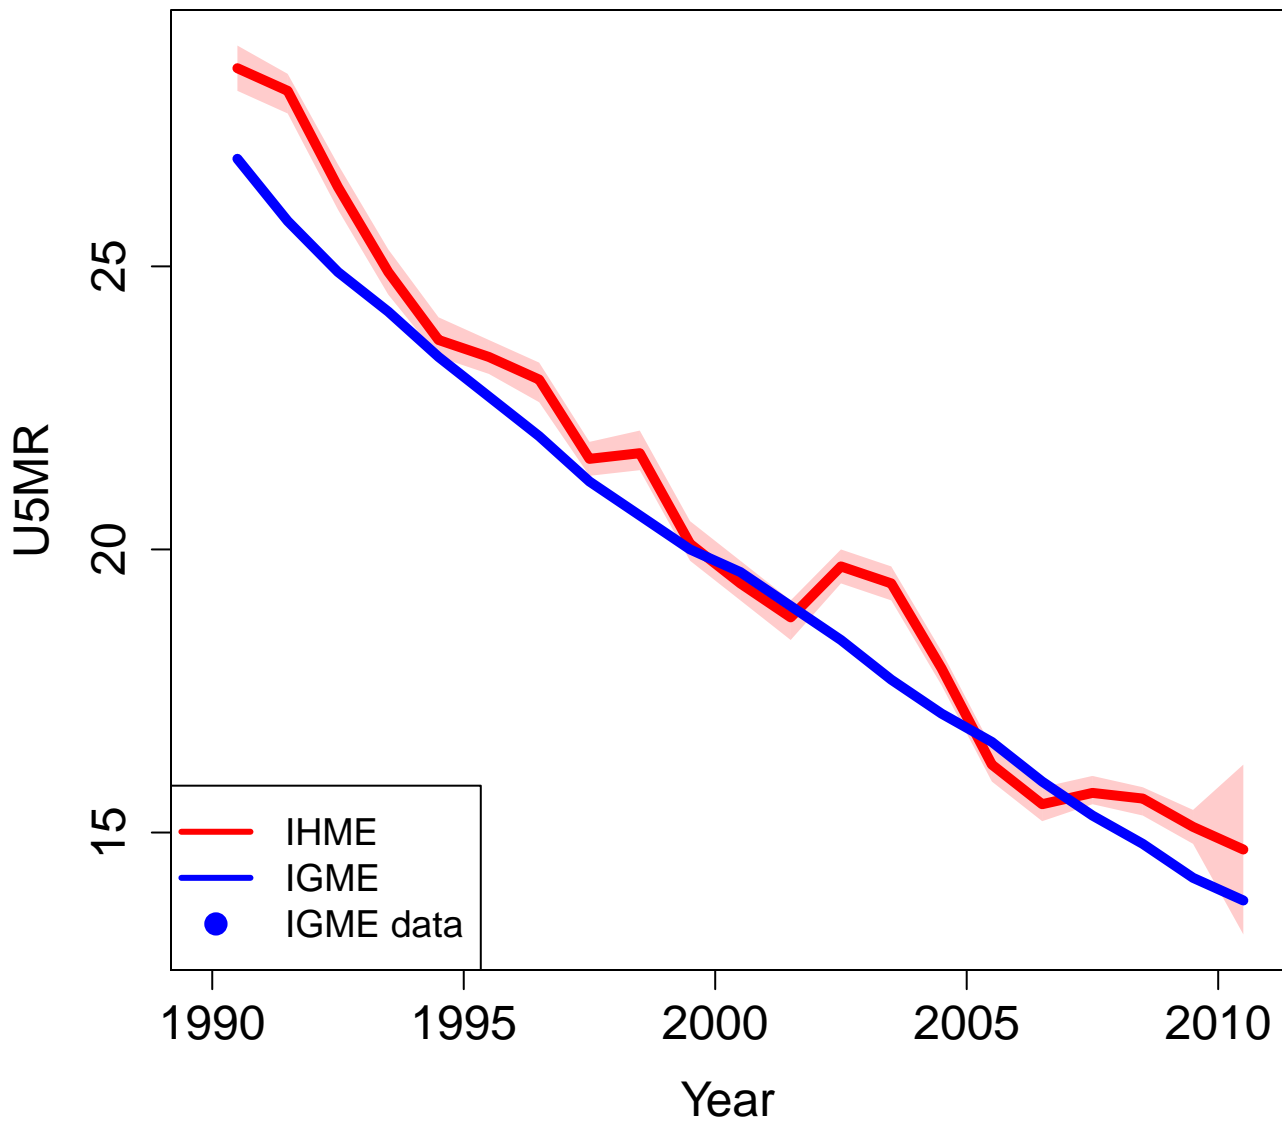

# Armenia

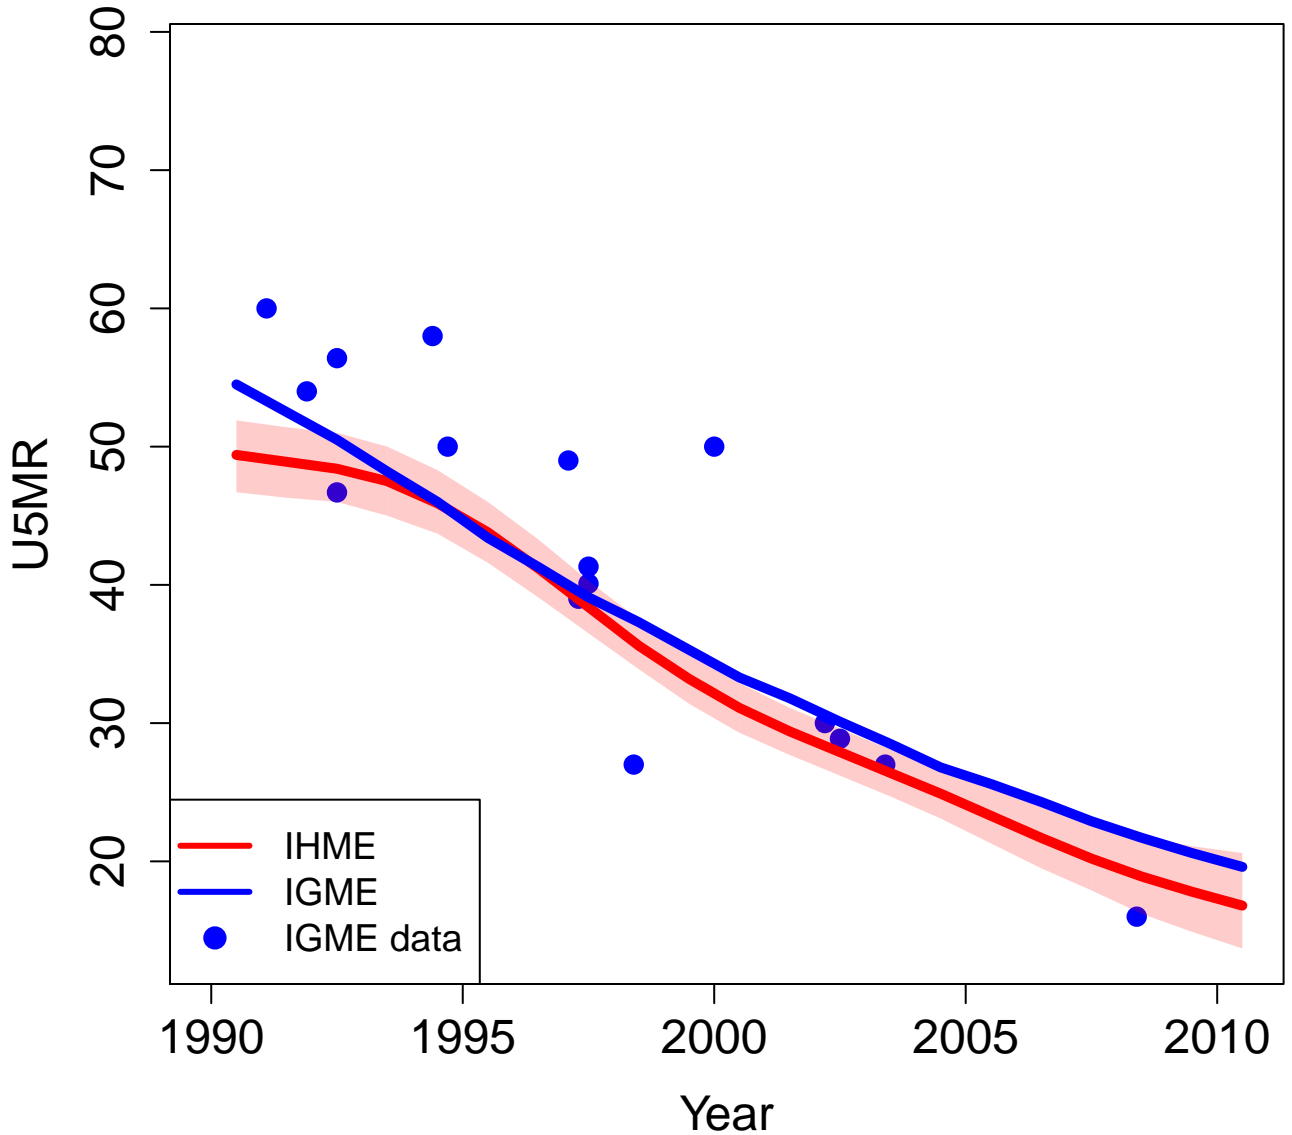



# Australia

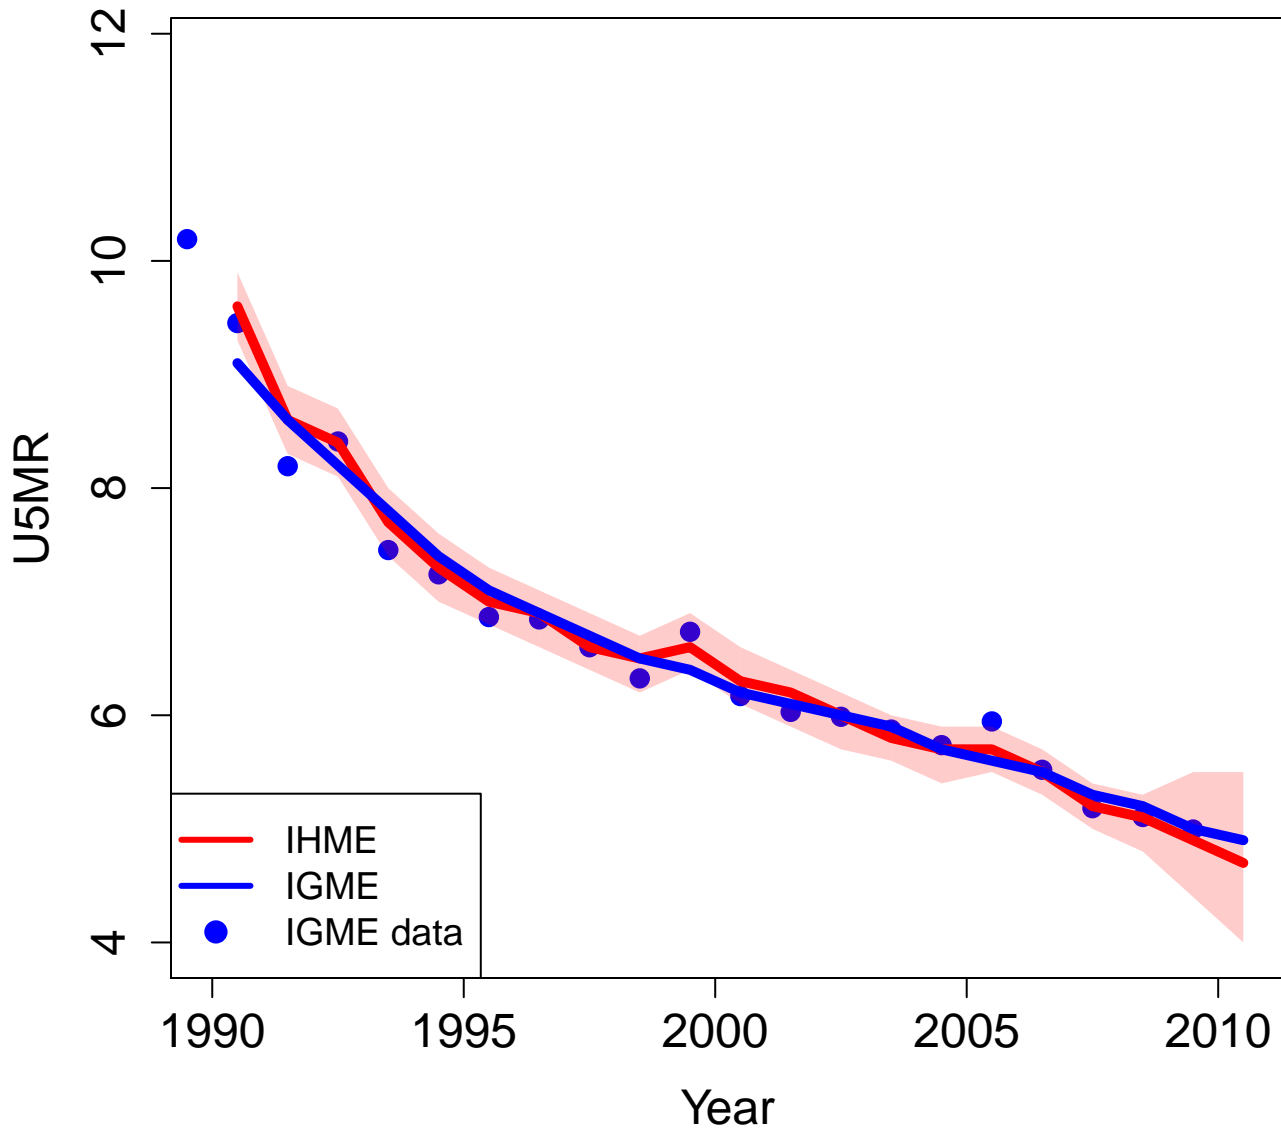

# Austria

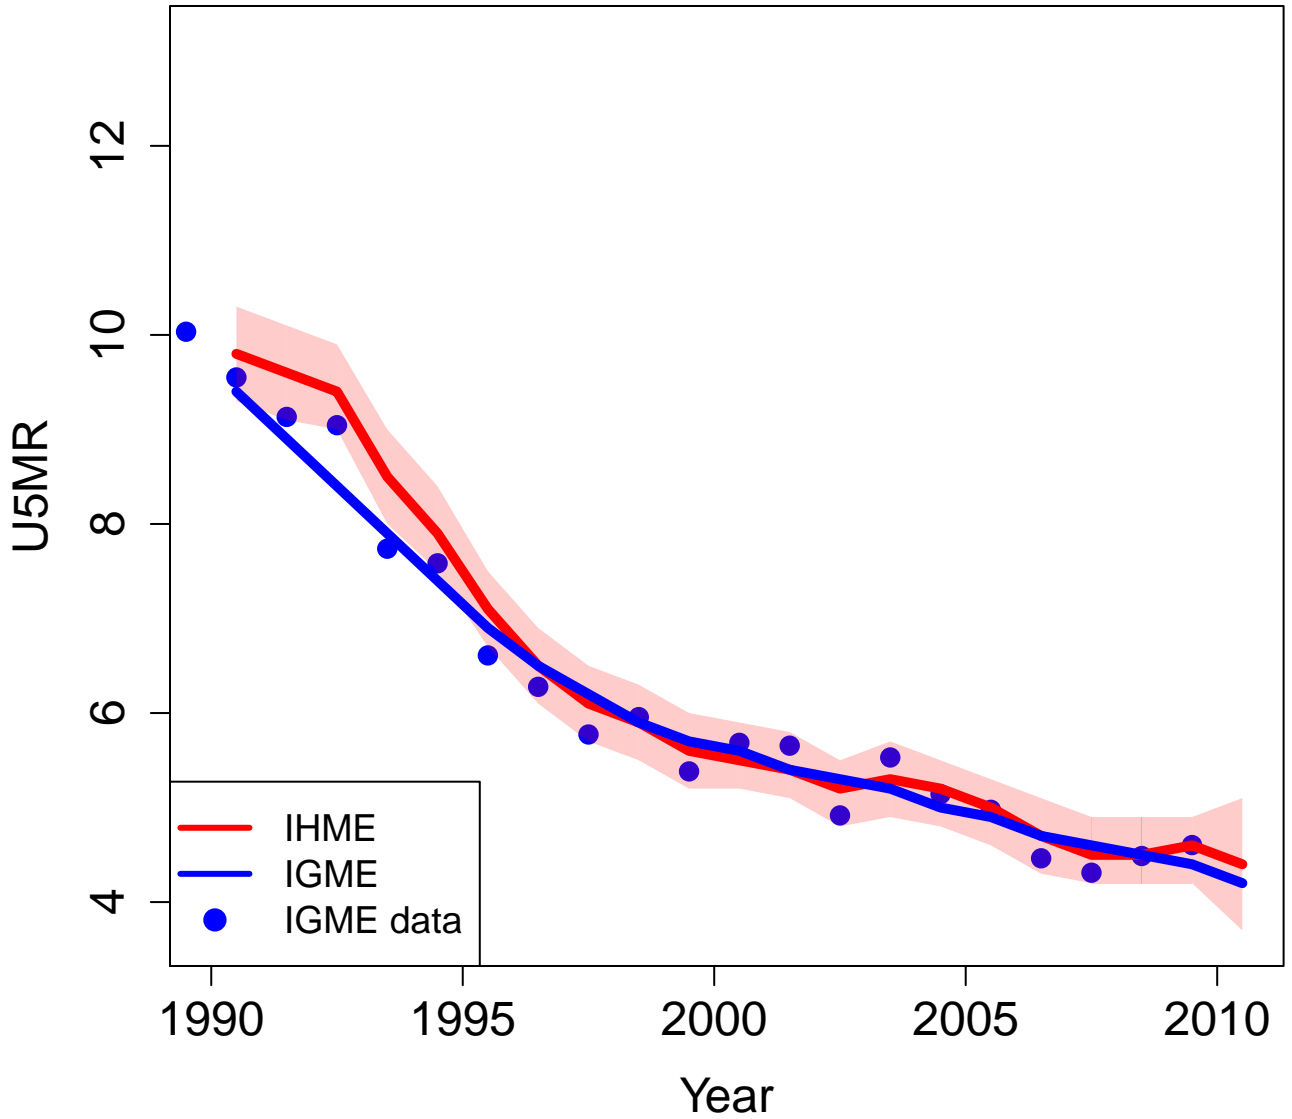

# Azerbaijan

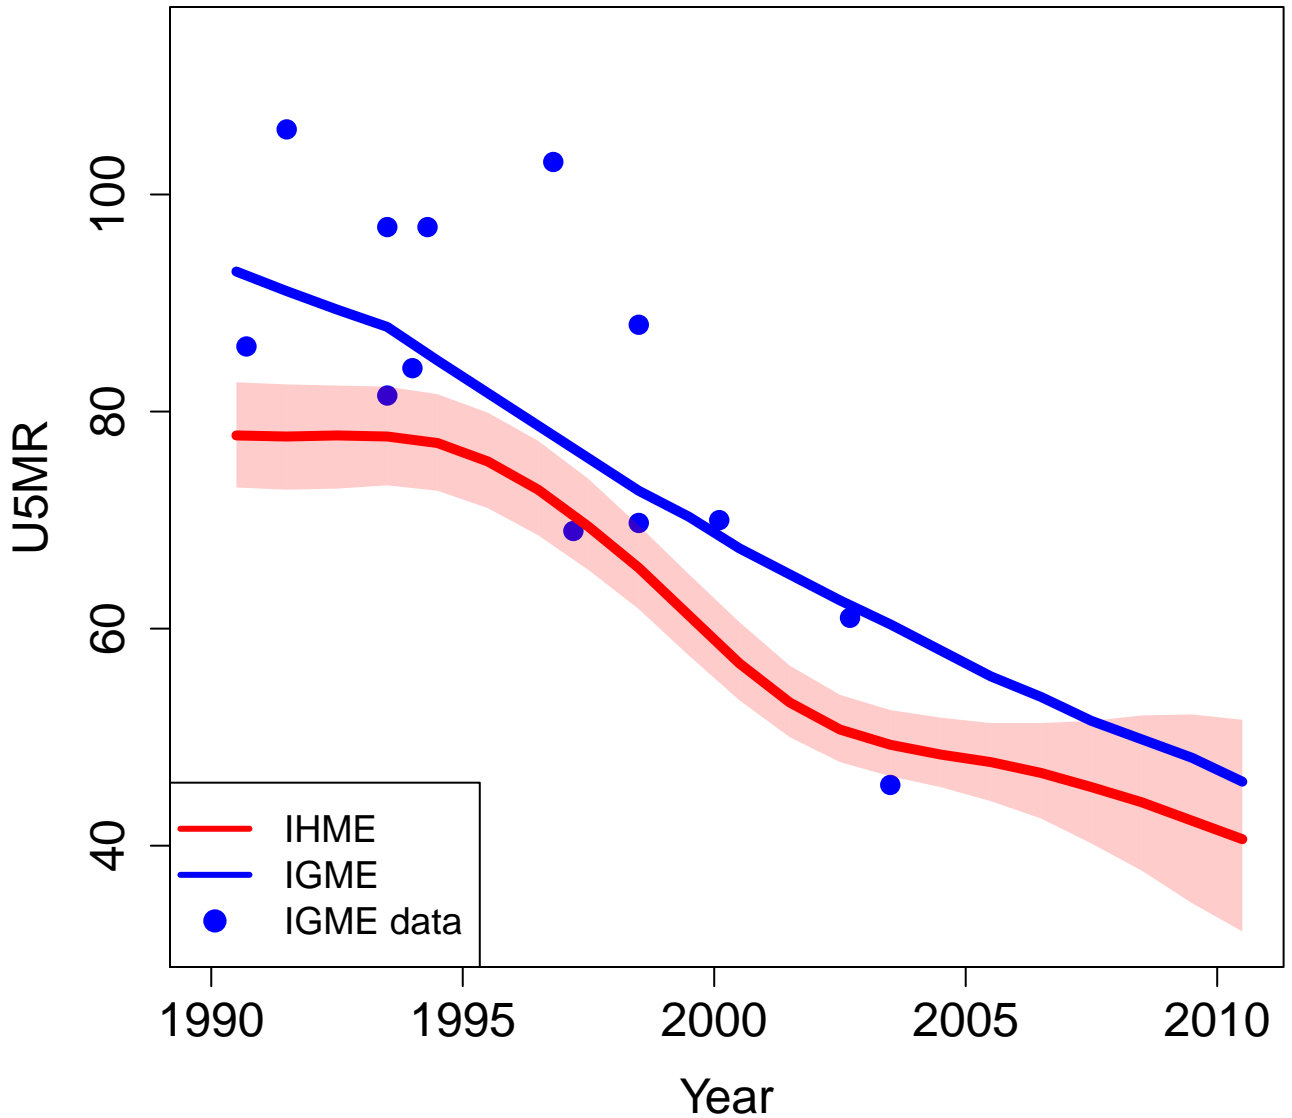

# Bahamas

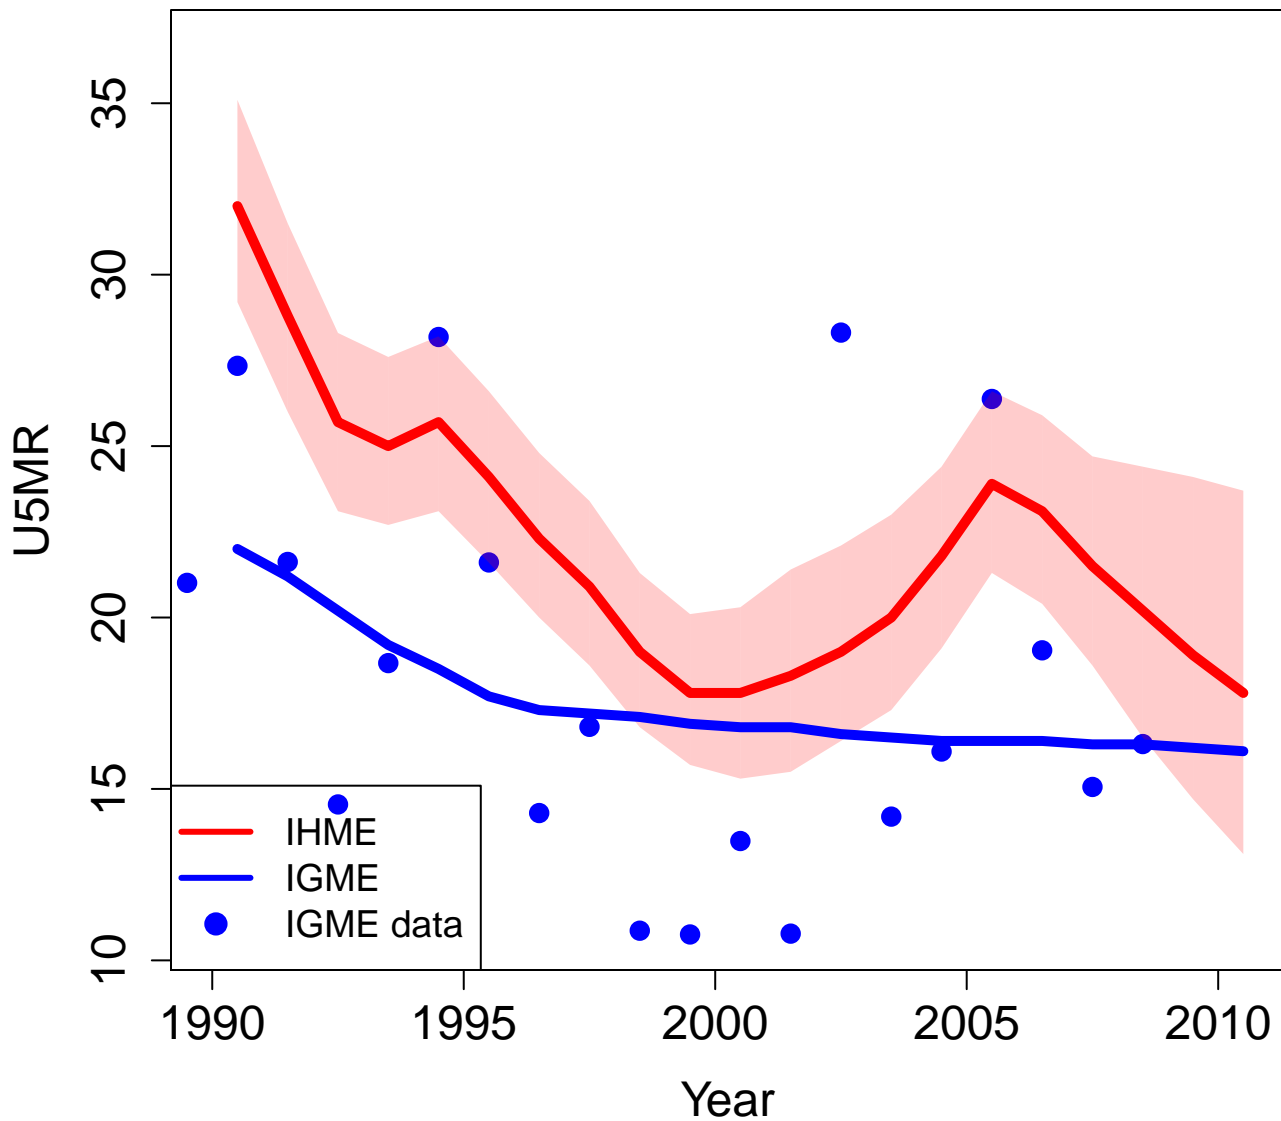

# Bahrain

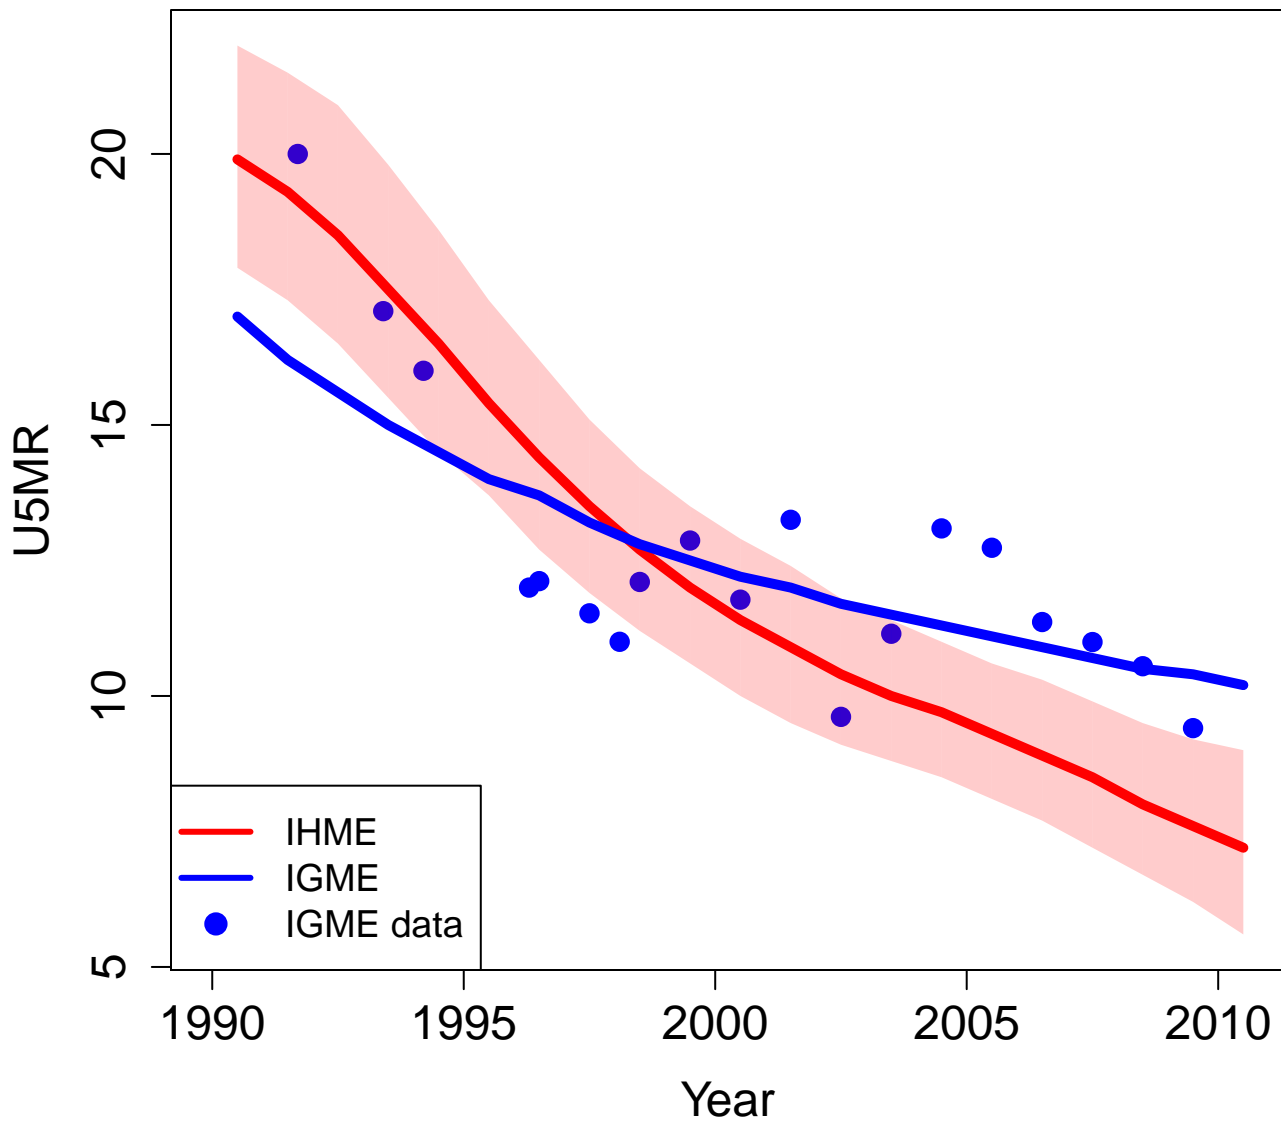

# Bangladesh

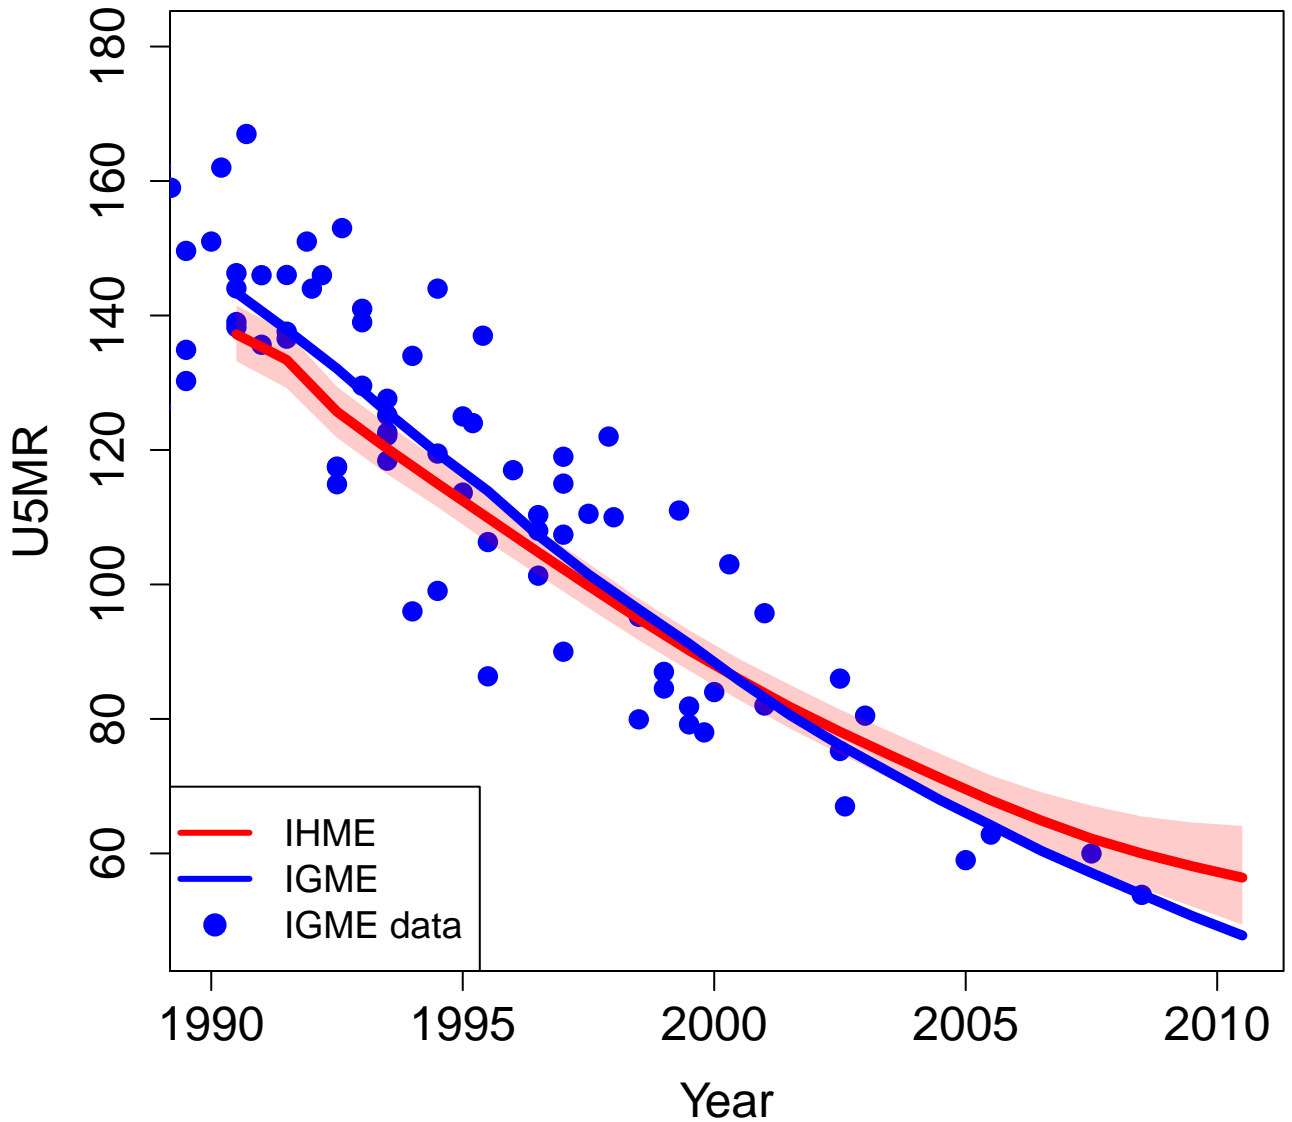

# Barbados

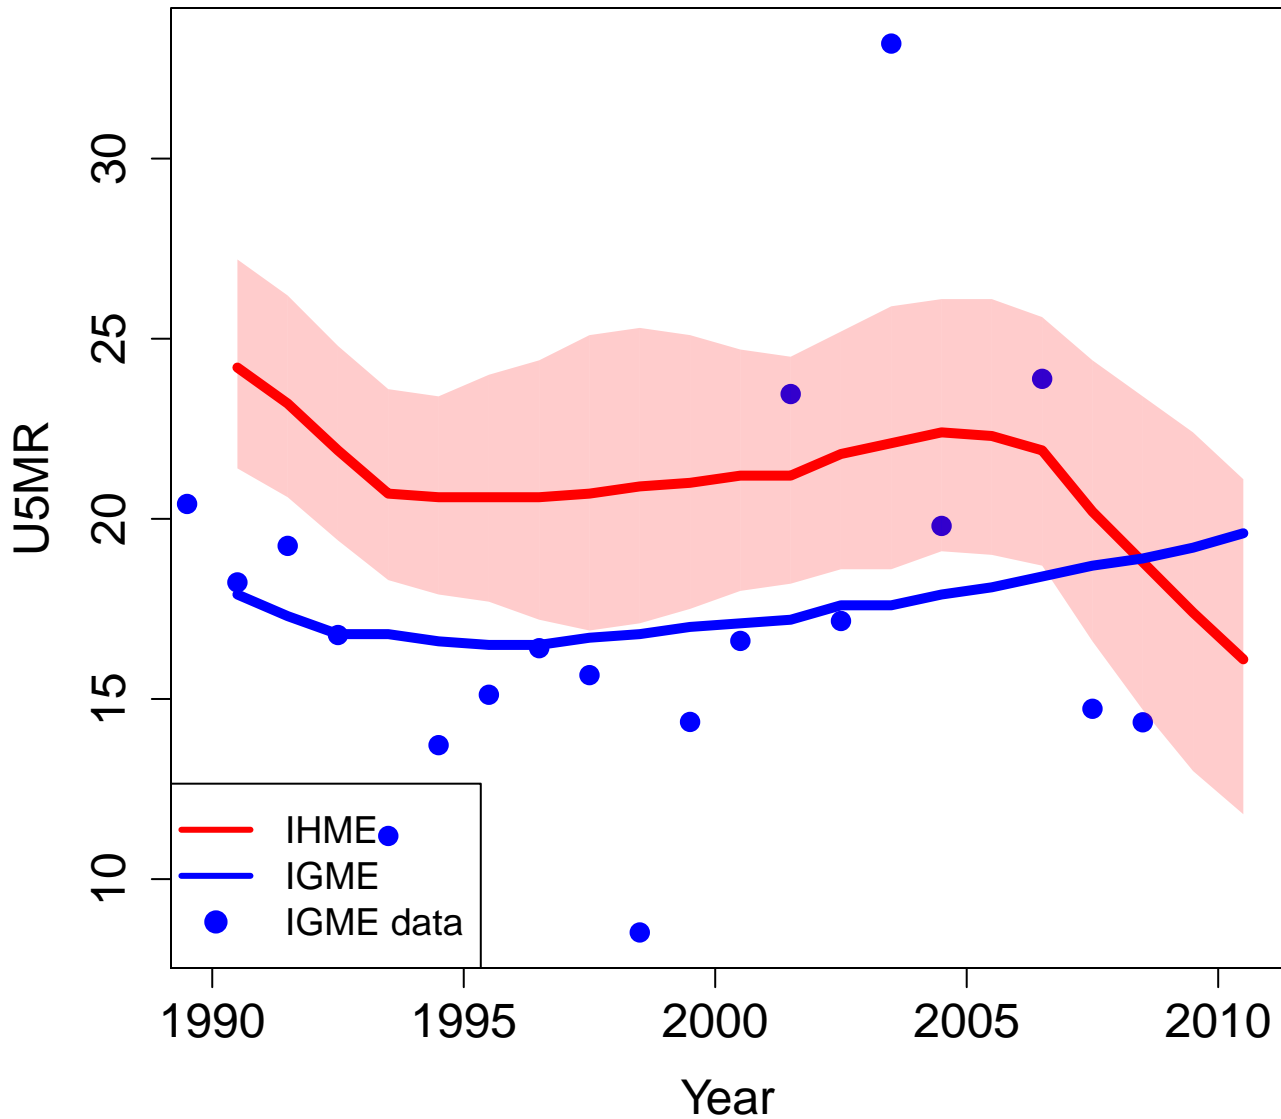

# Belarus

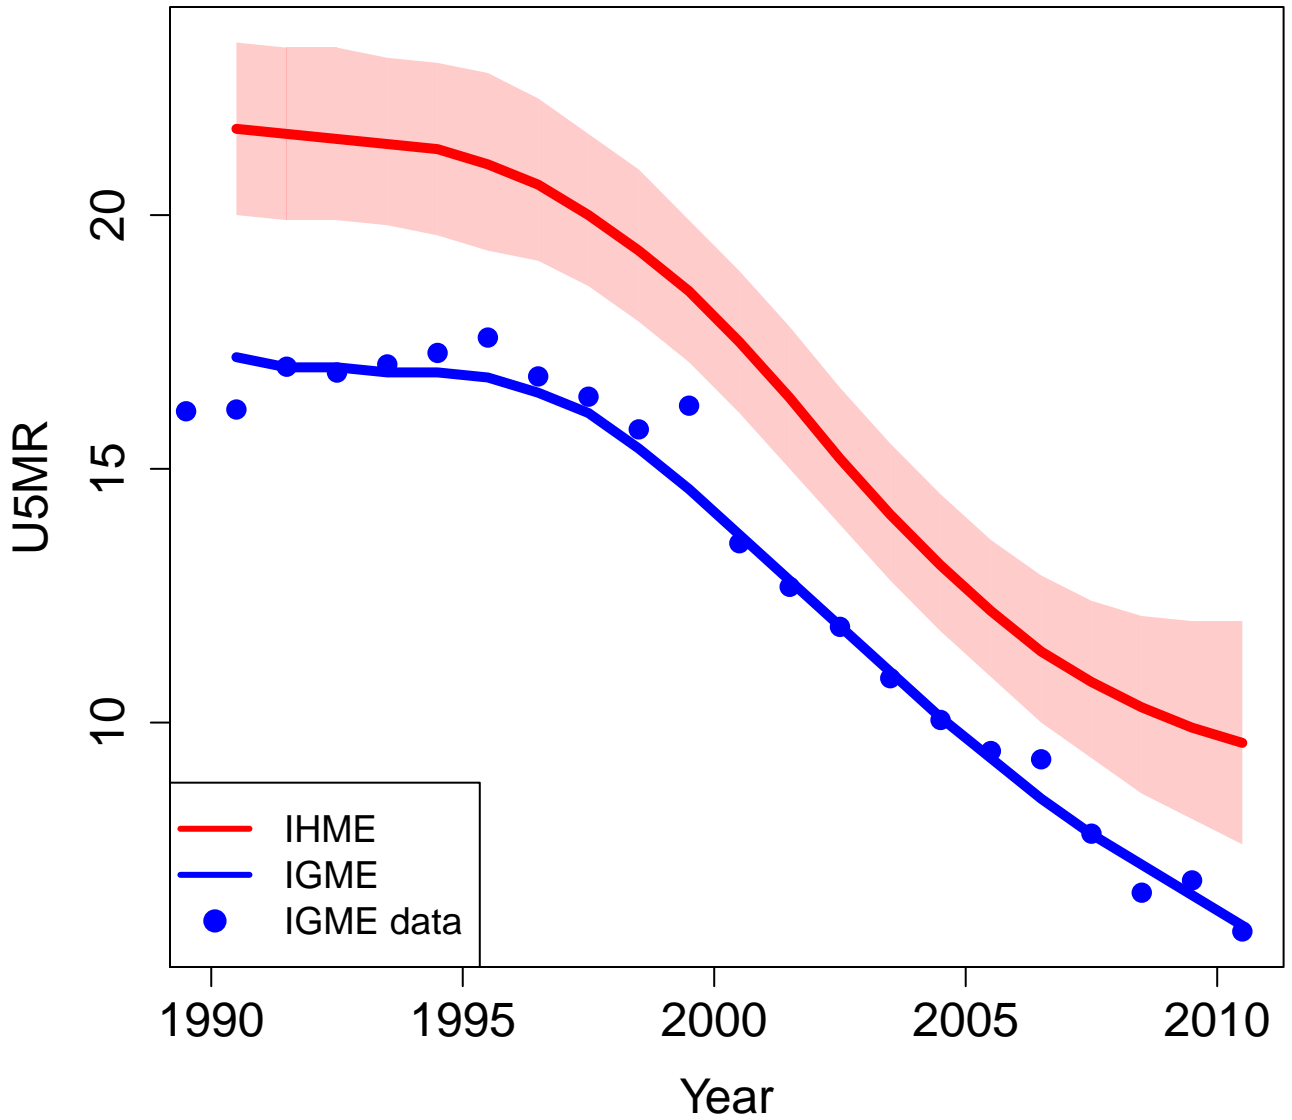



# Belgium

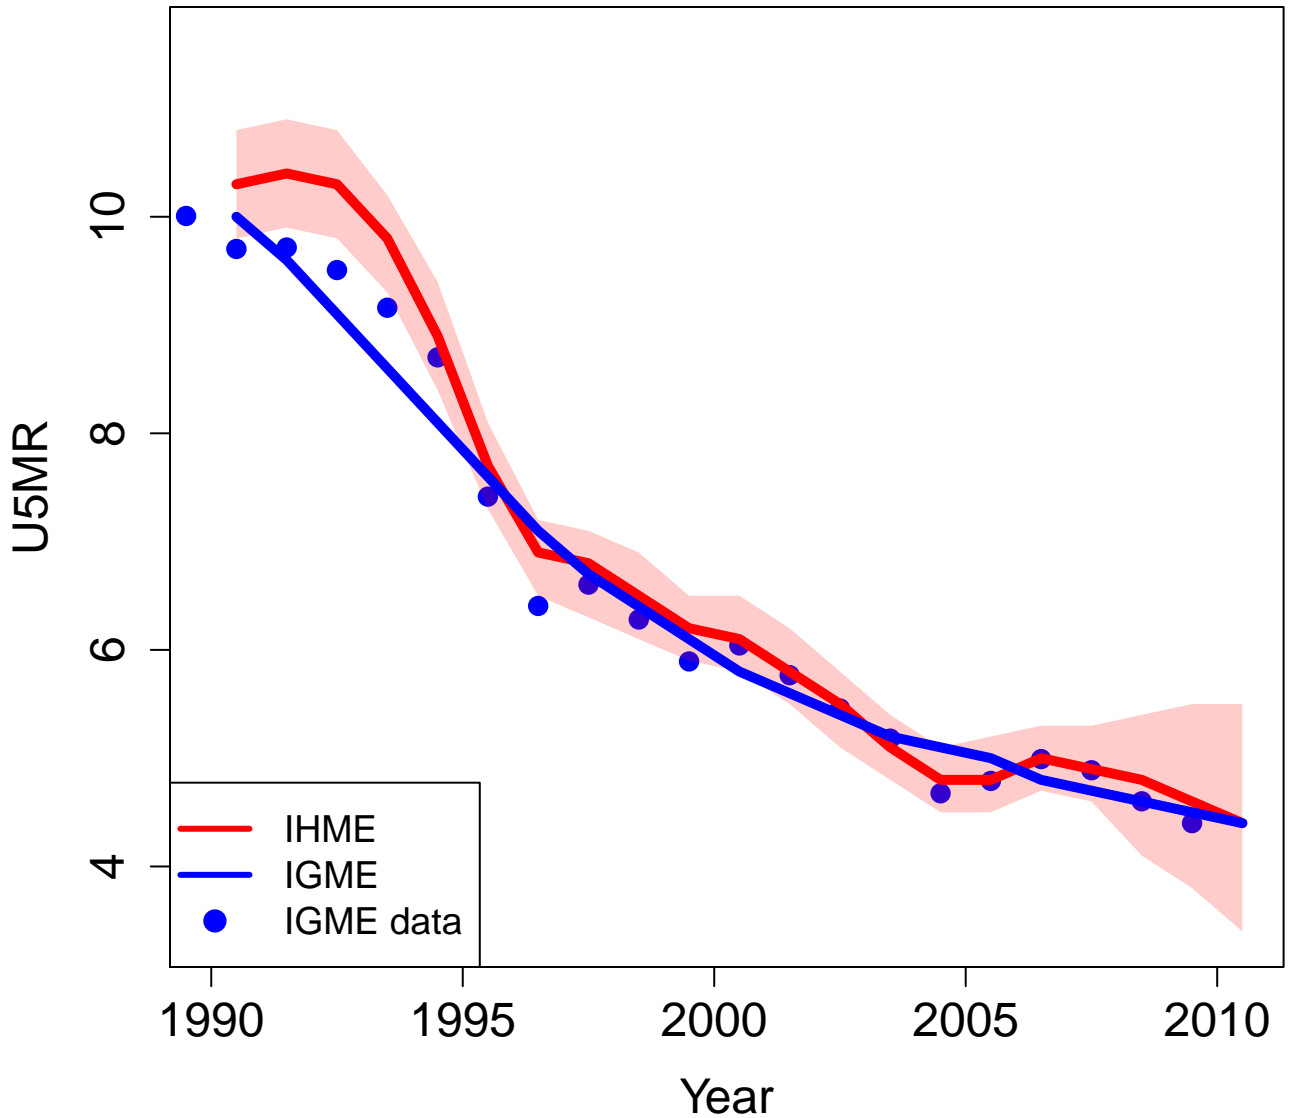

# Belize

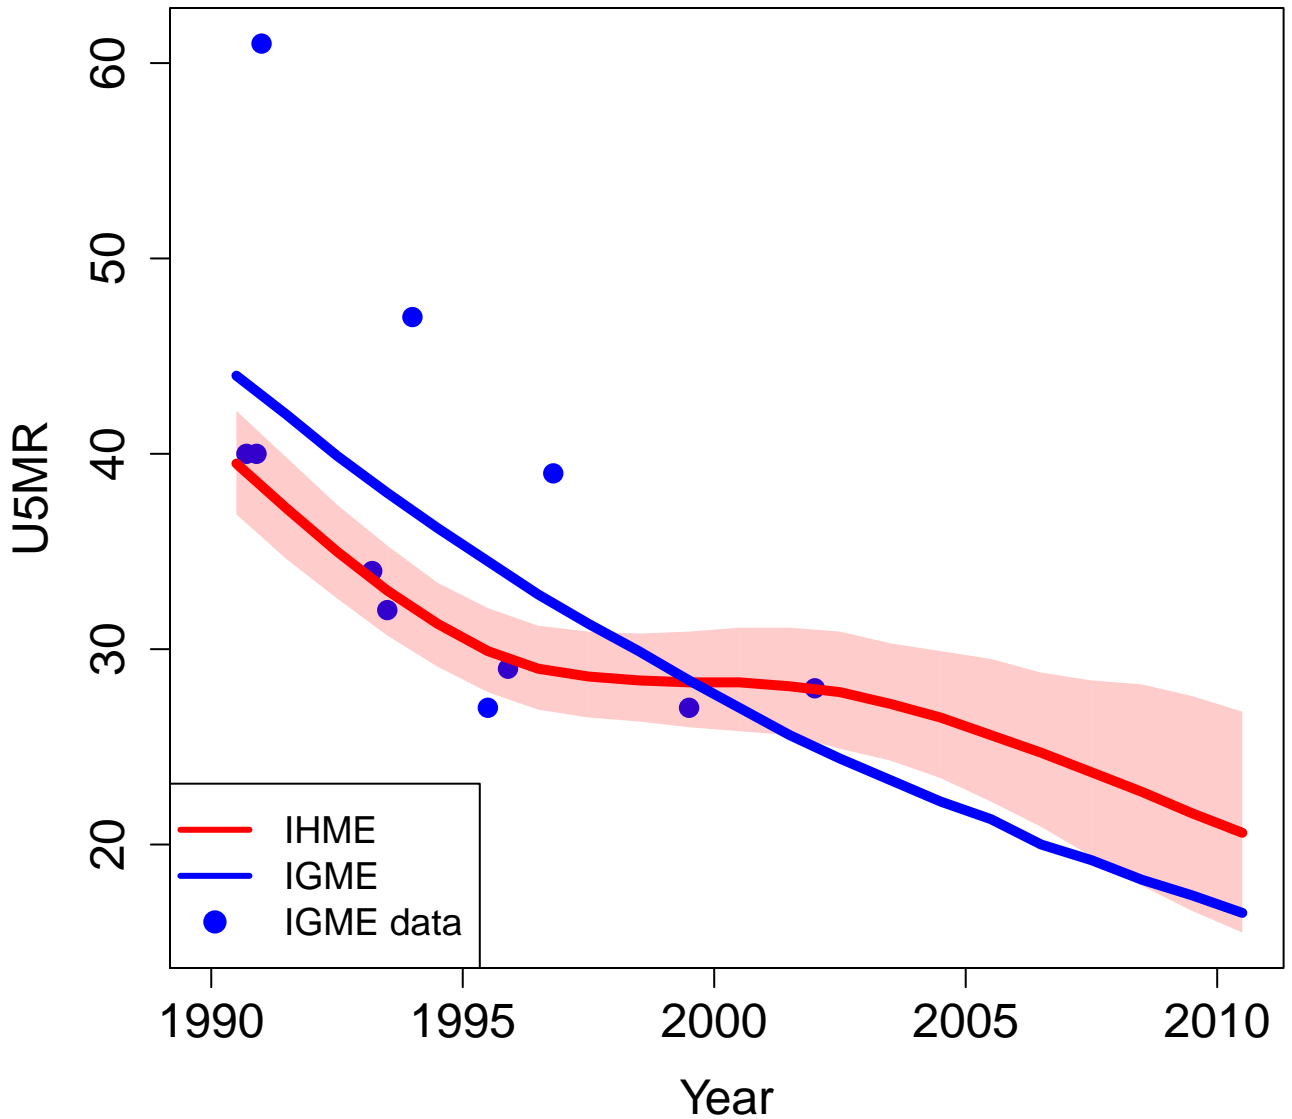

# Benin

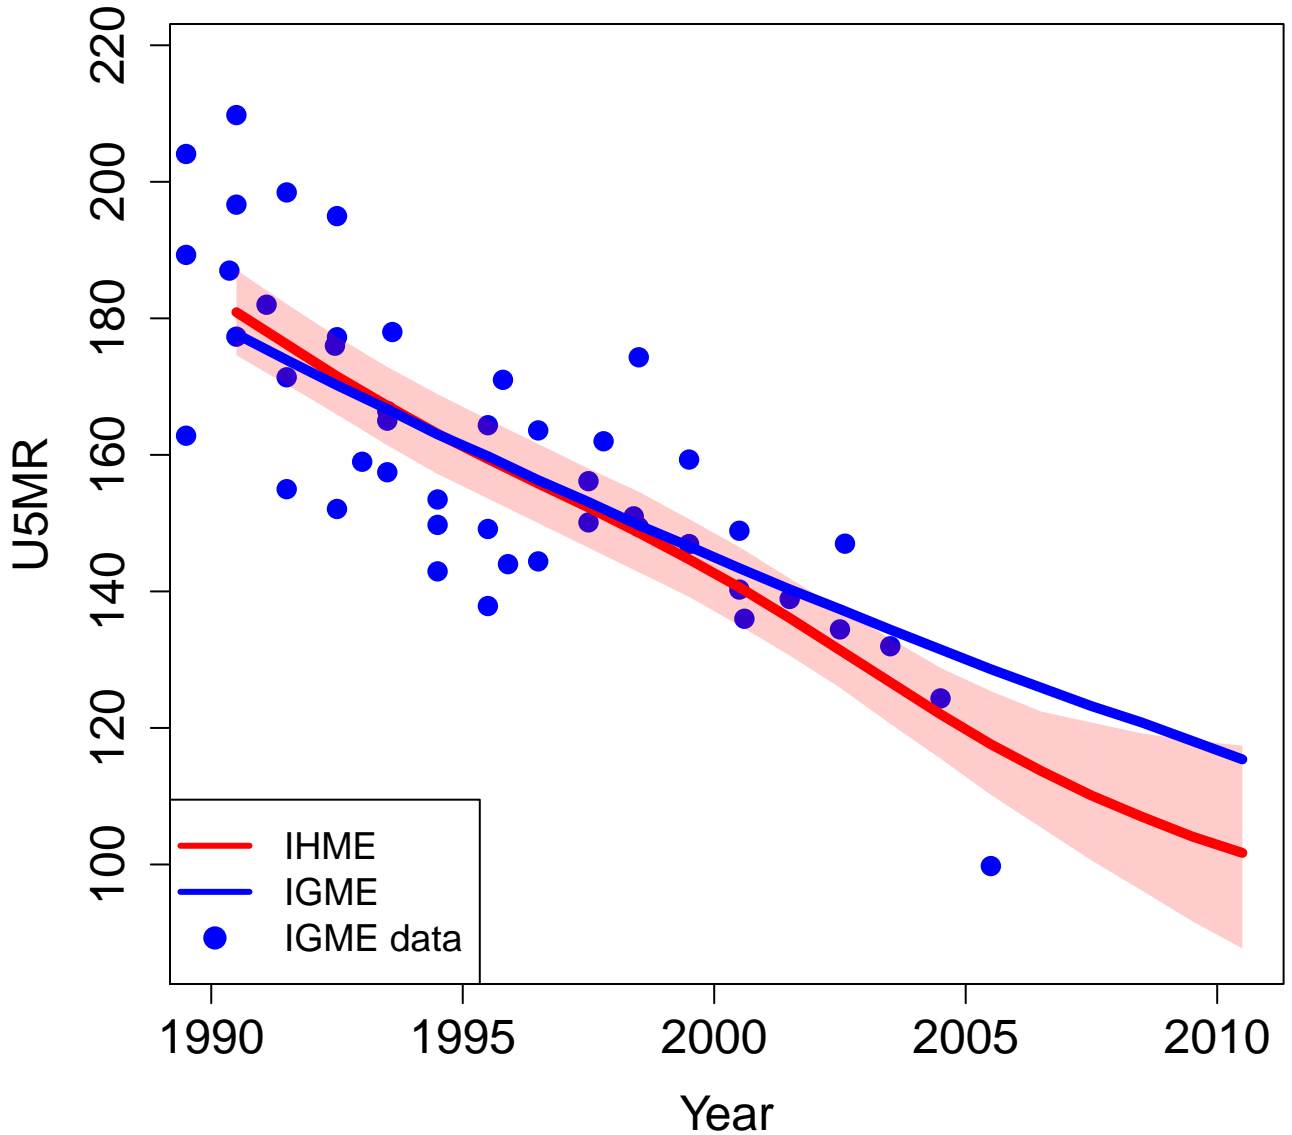

# Bhutan

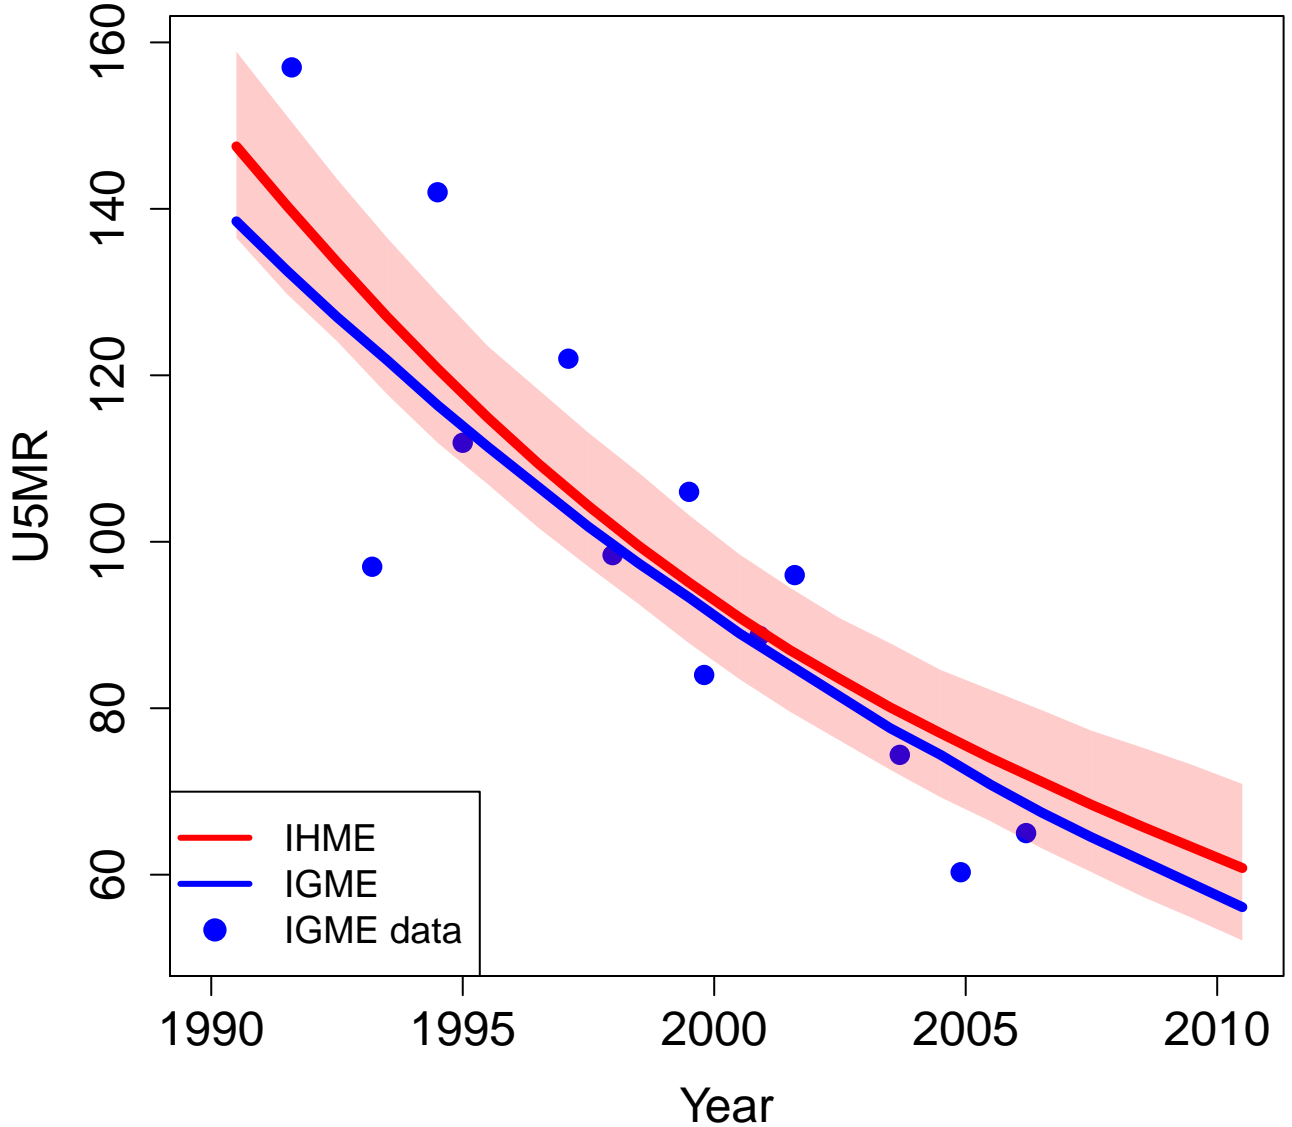

# Bolivia

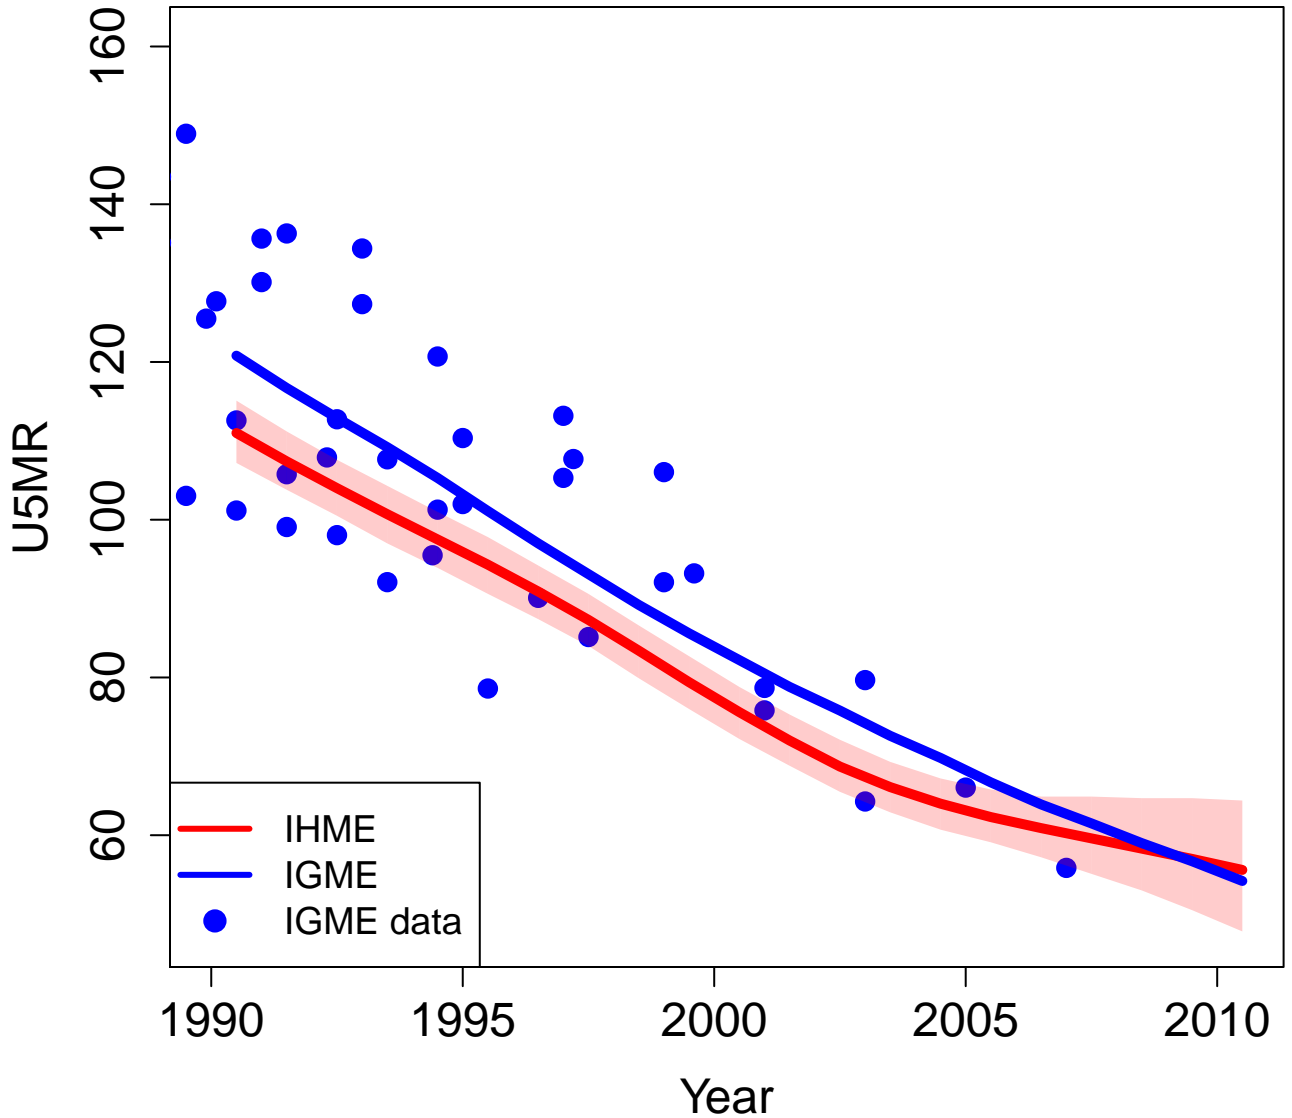

# Bosn&Herze

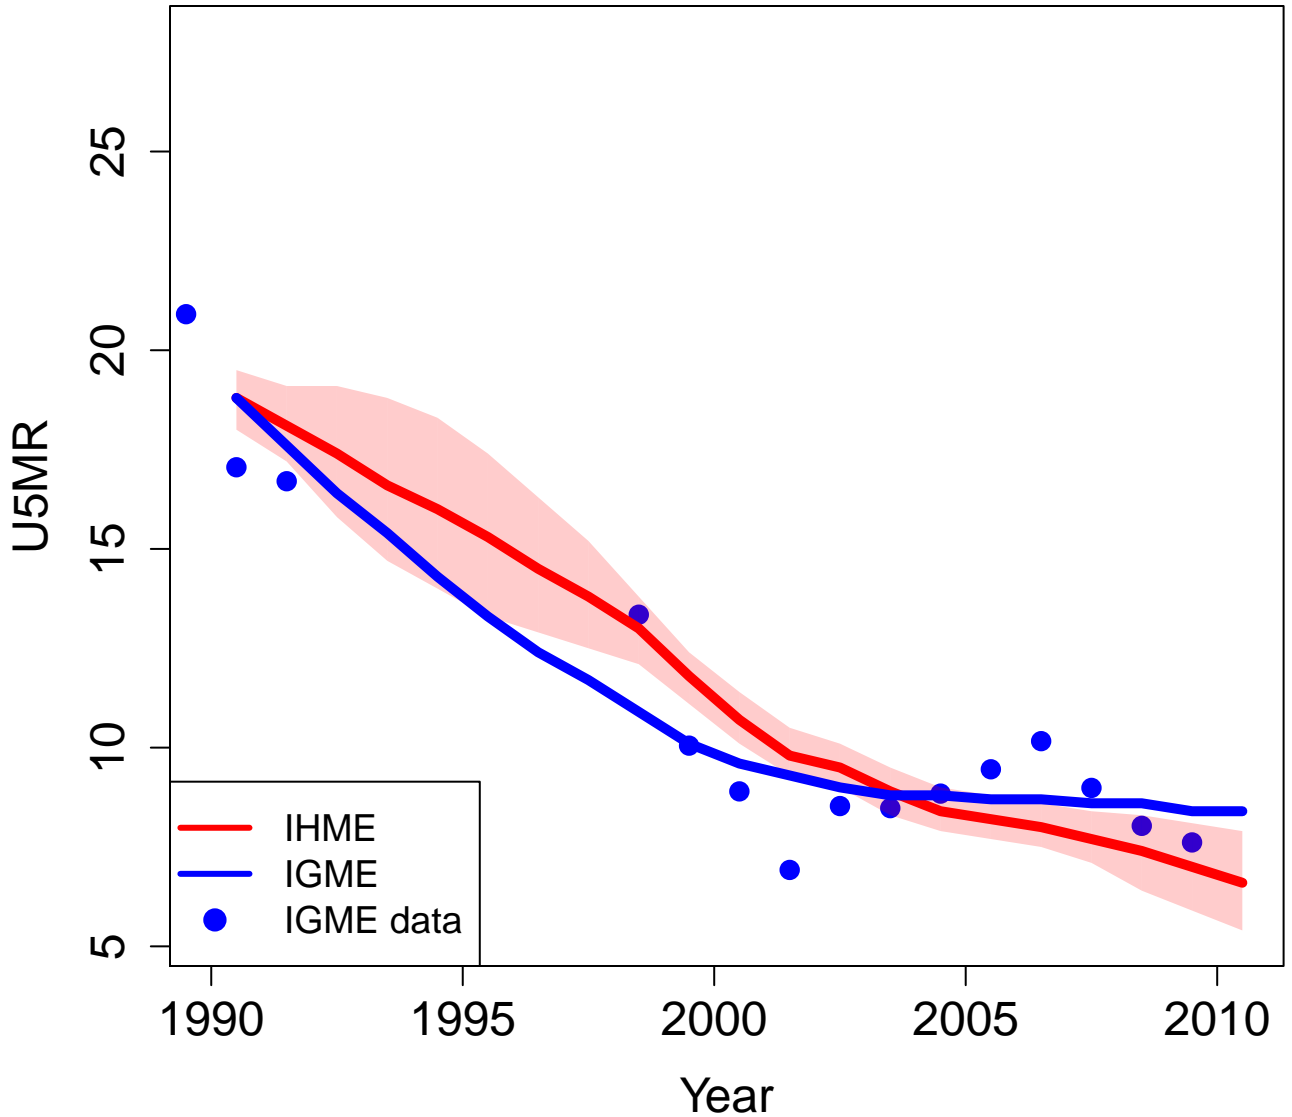

# Botswana

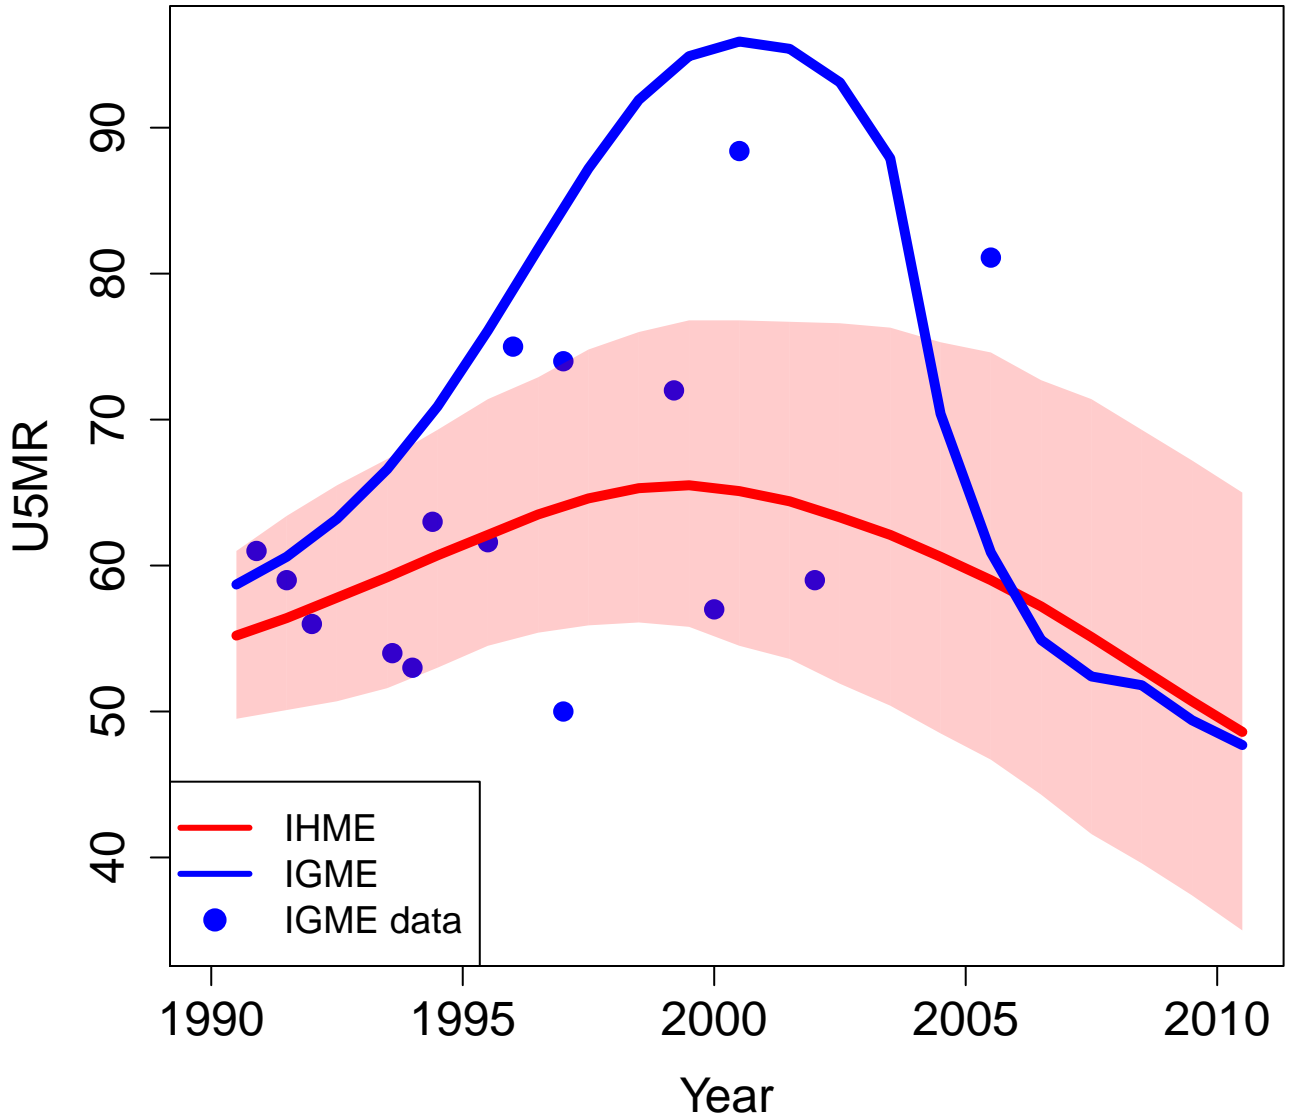

# Brazil

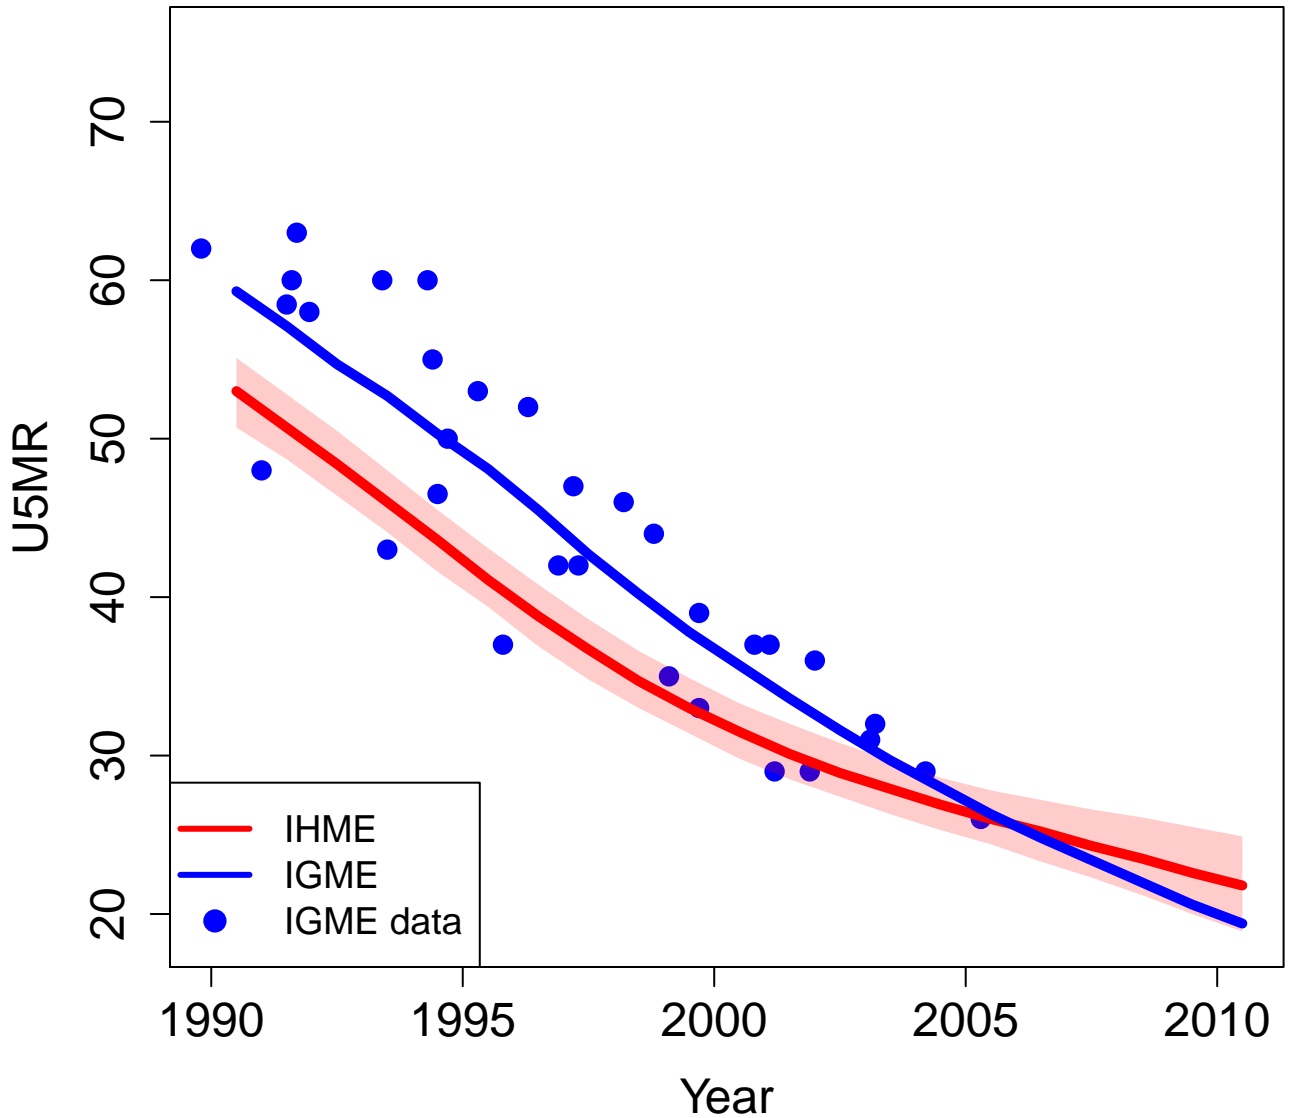



# Brunei

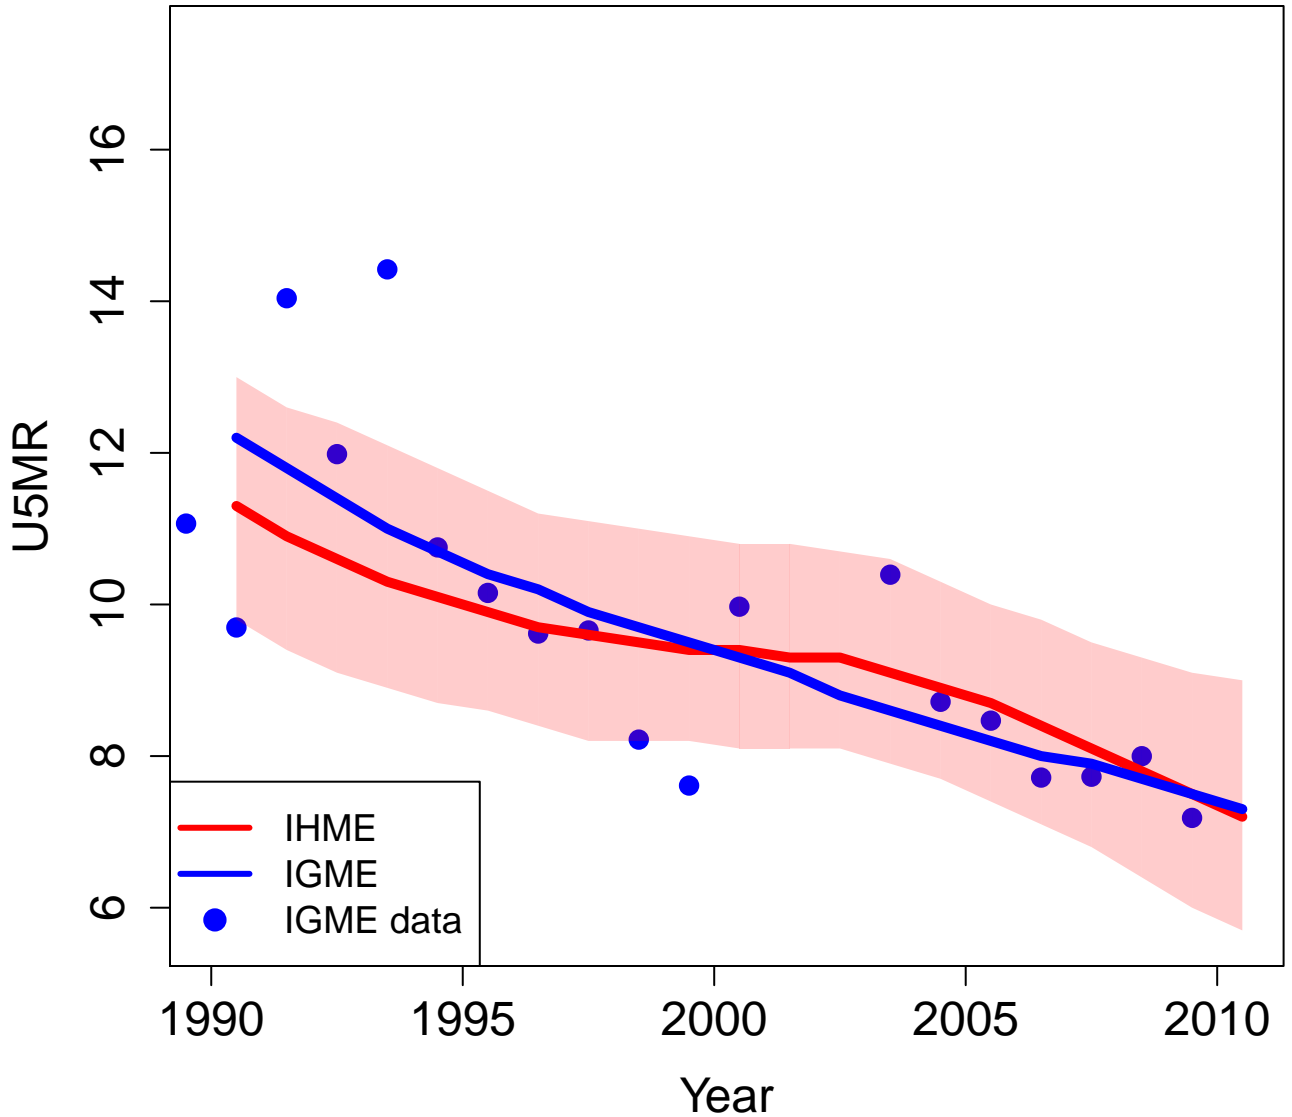

# Bulgaria

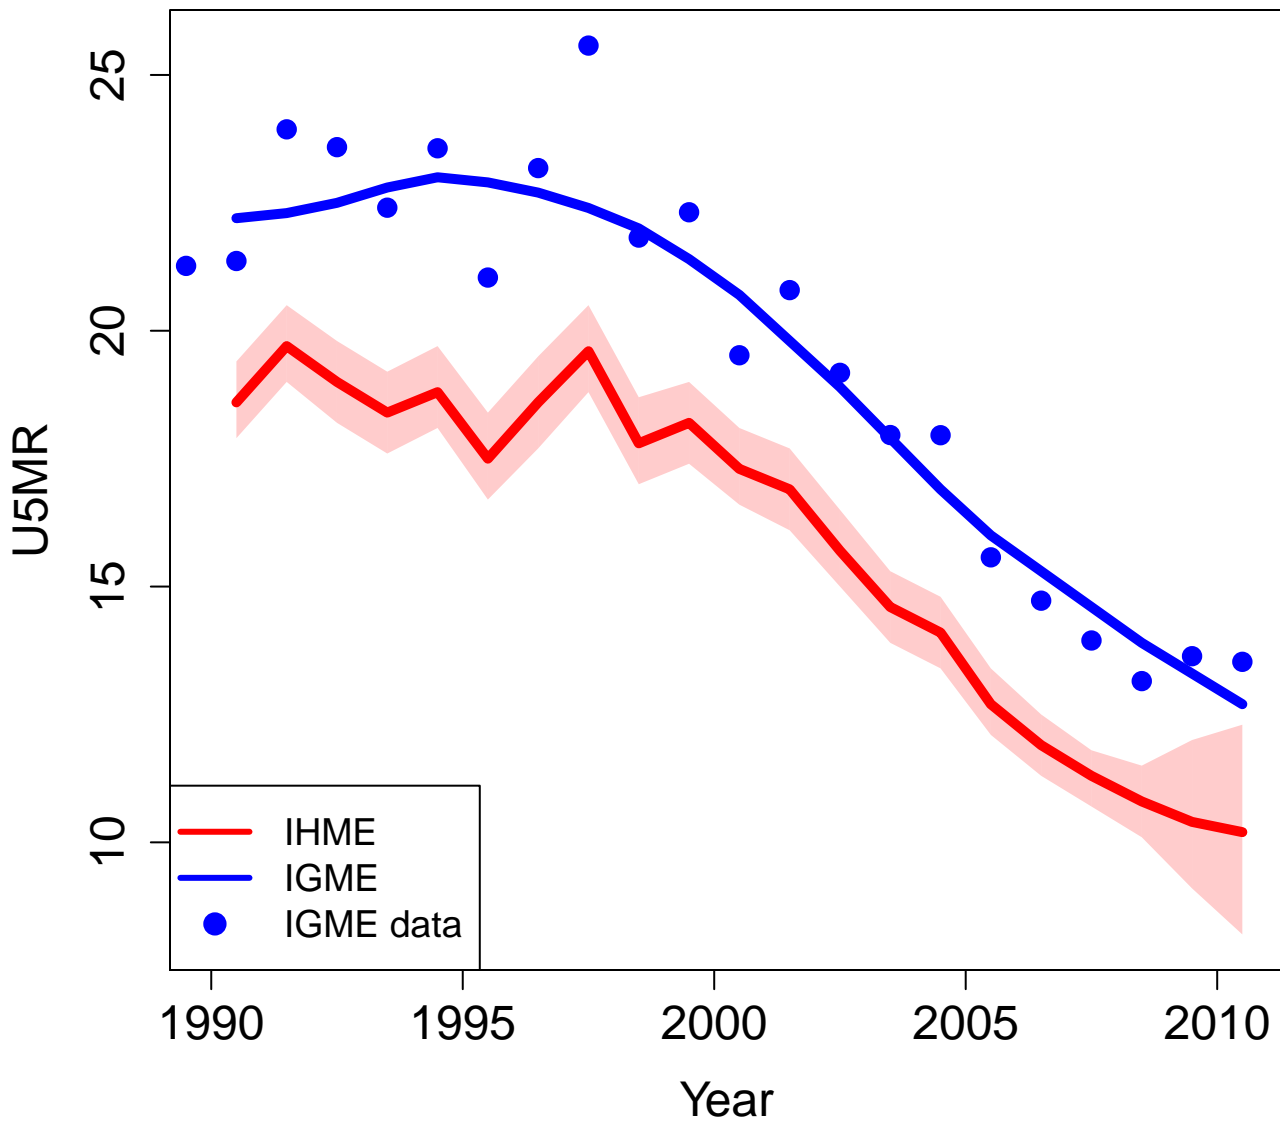

# Burkina Faso

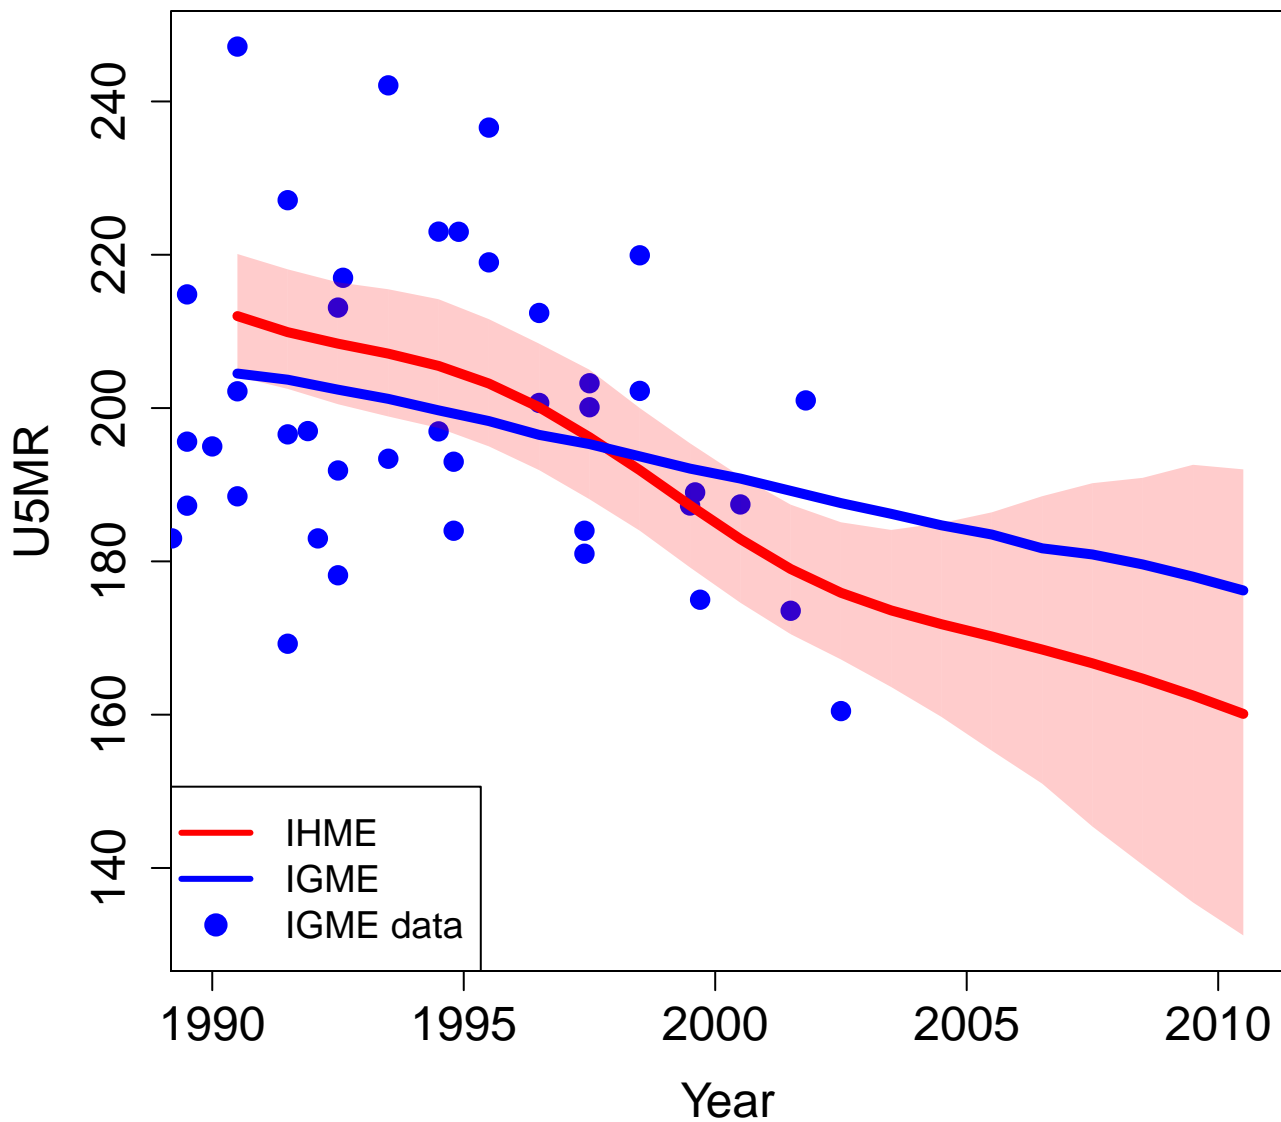

# Burundi

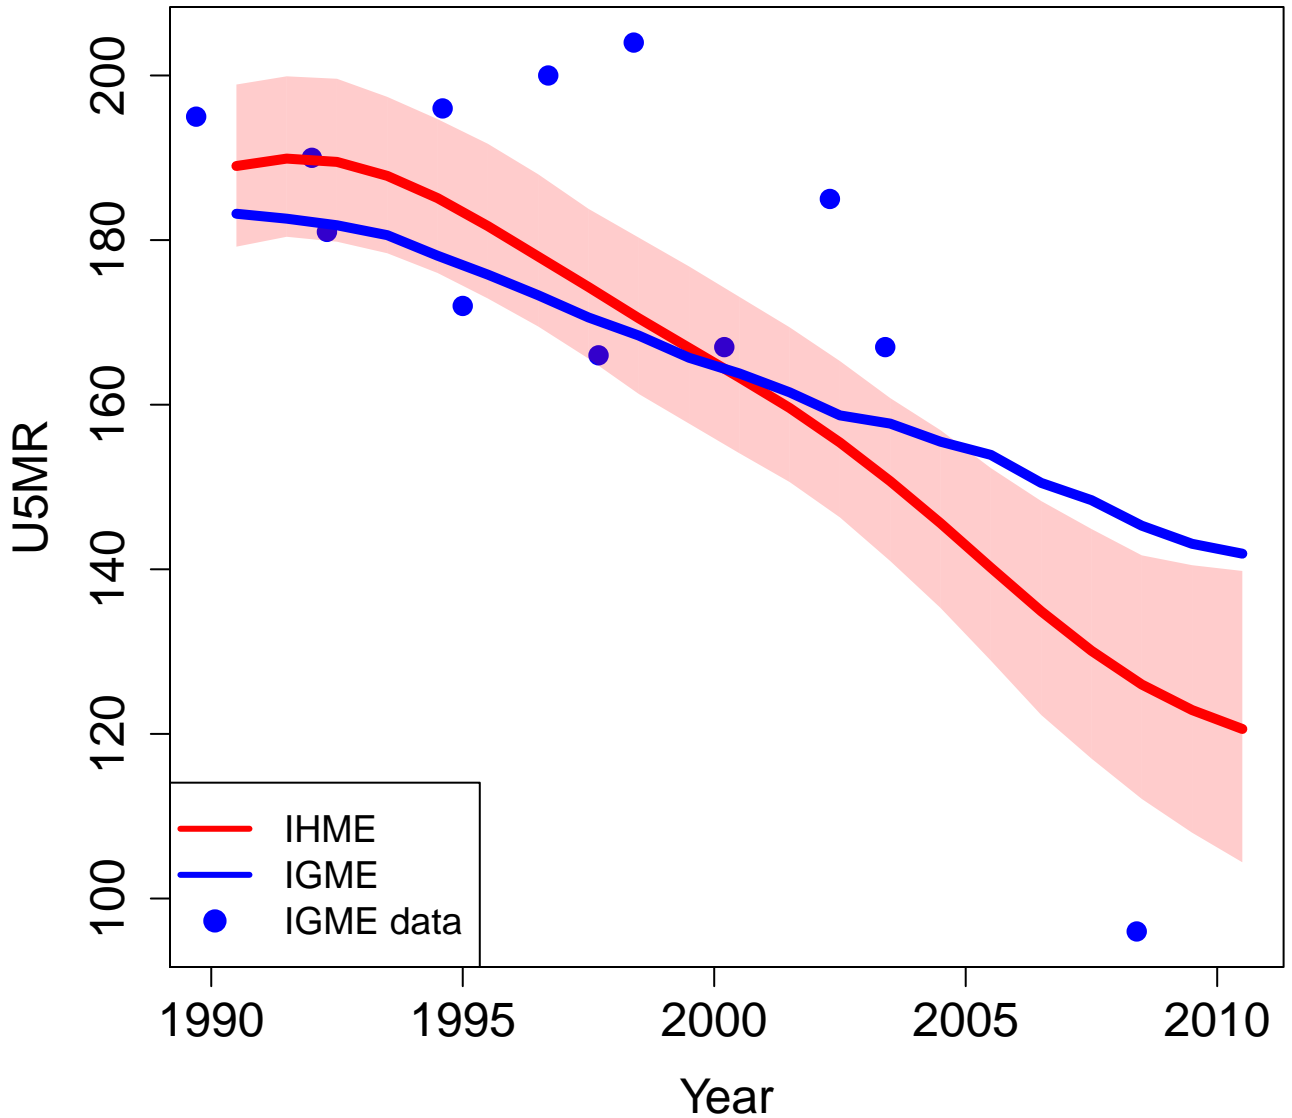

# Cambodia

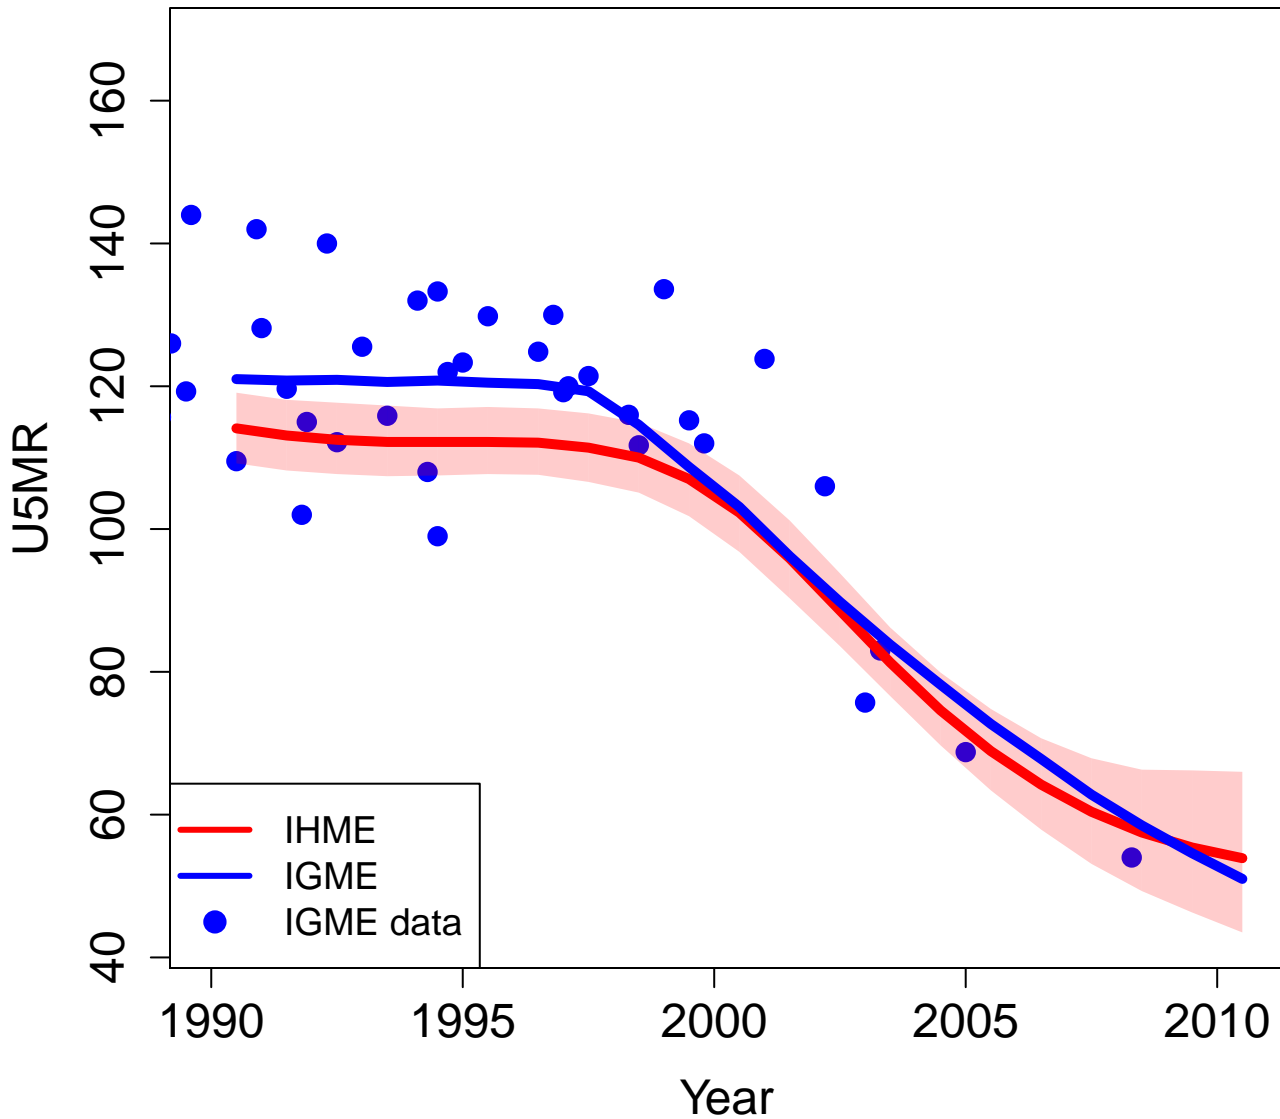

# Cameroon

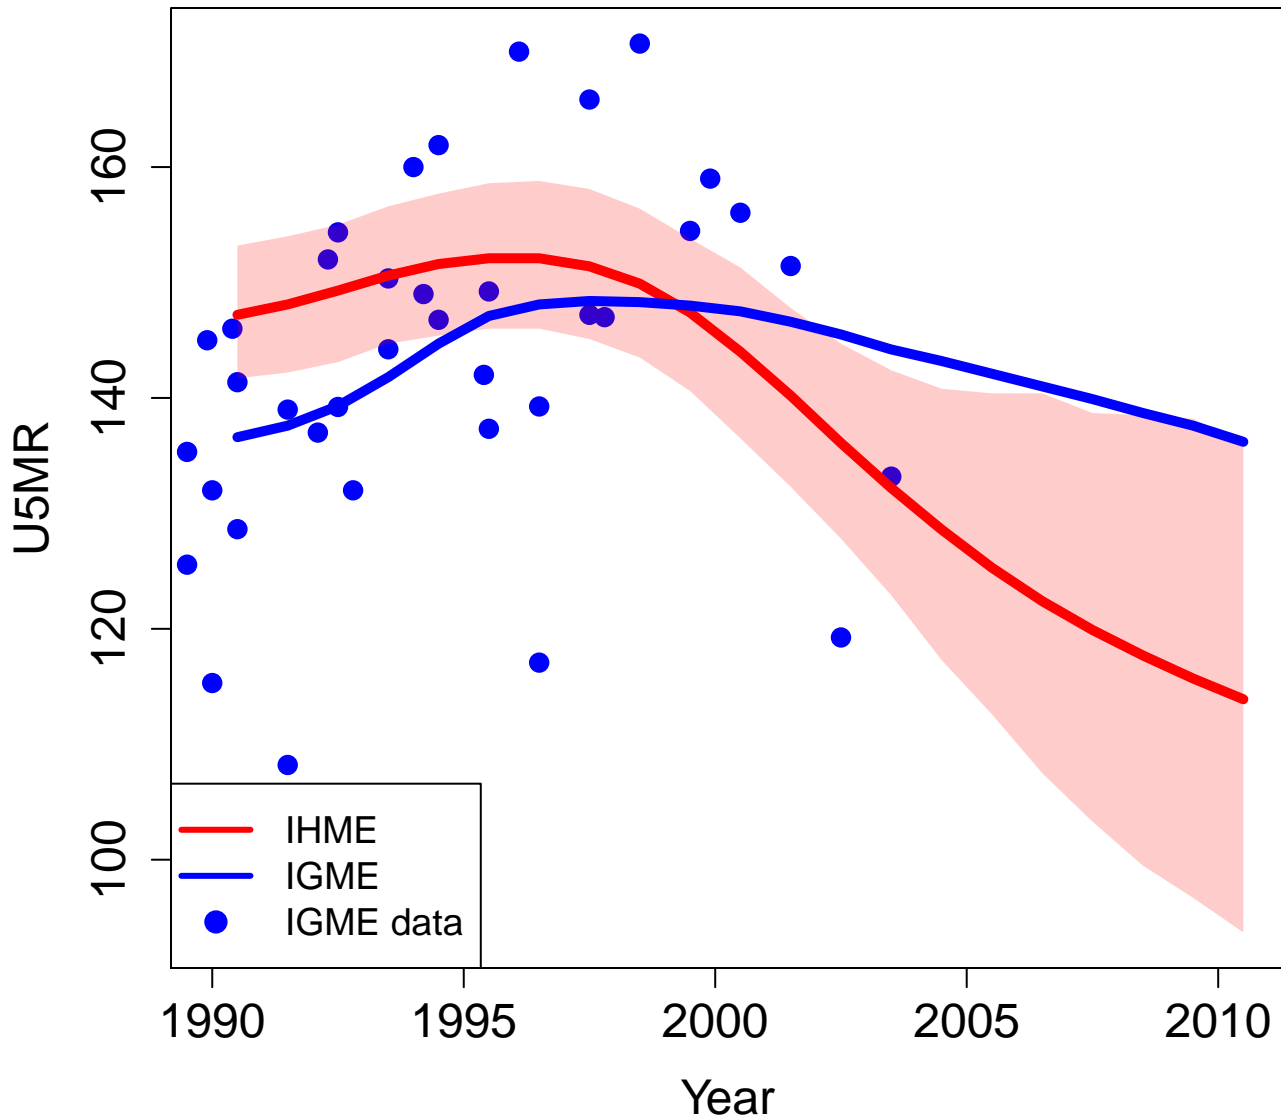

# Canada

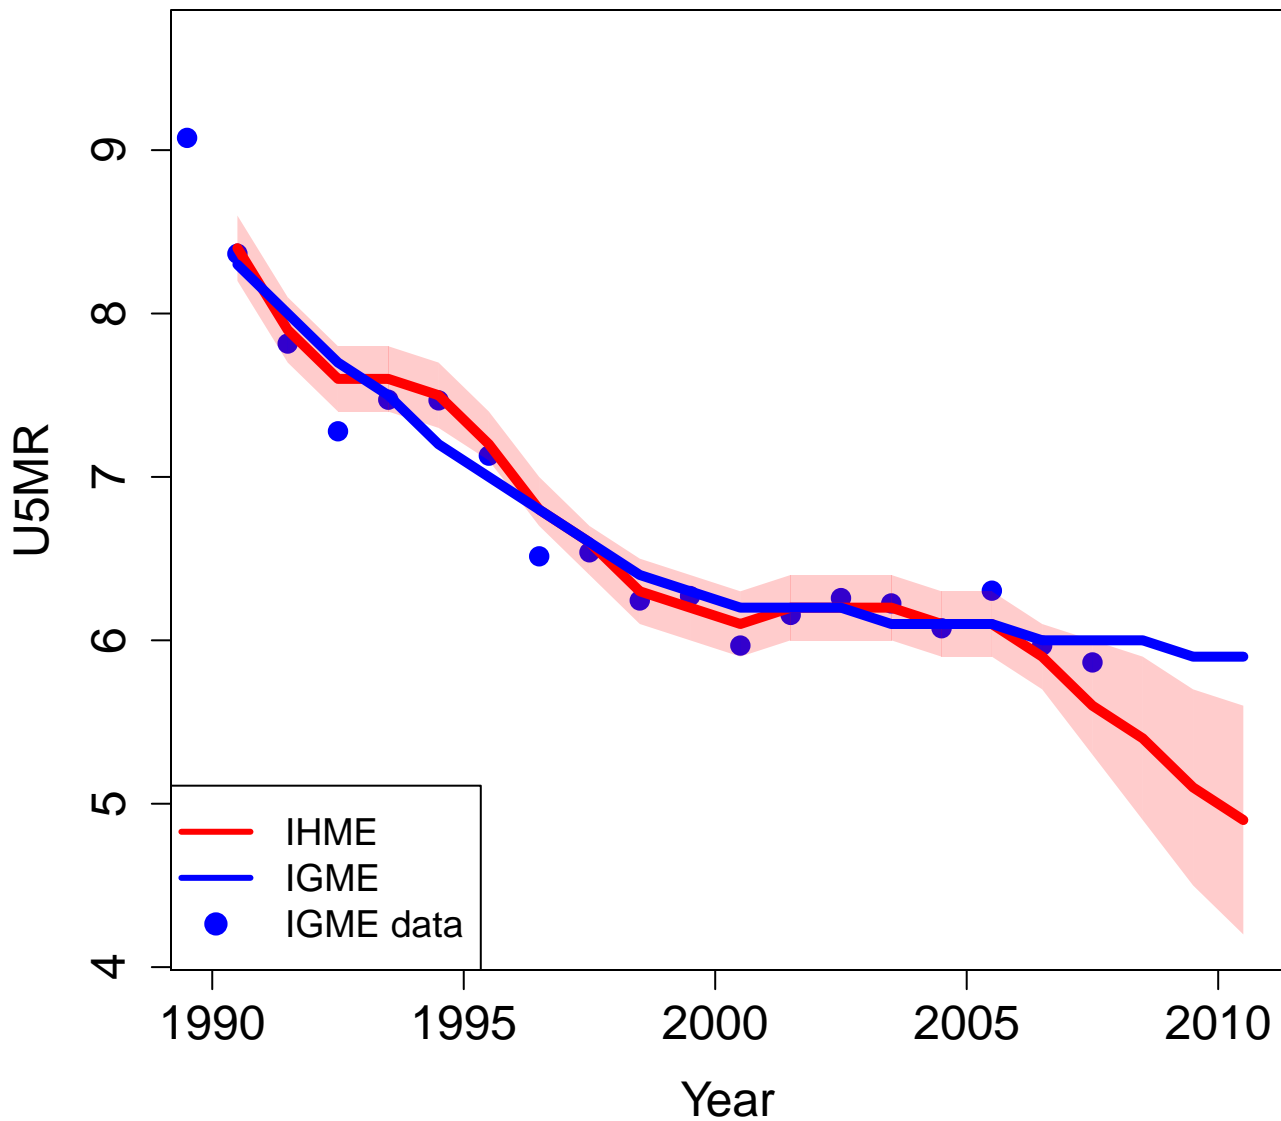

# Cape Verde

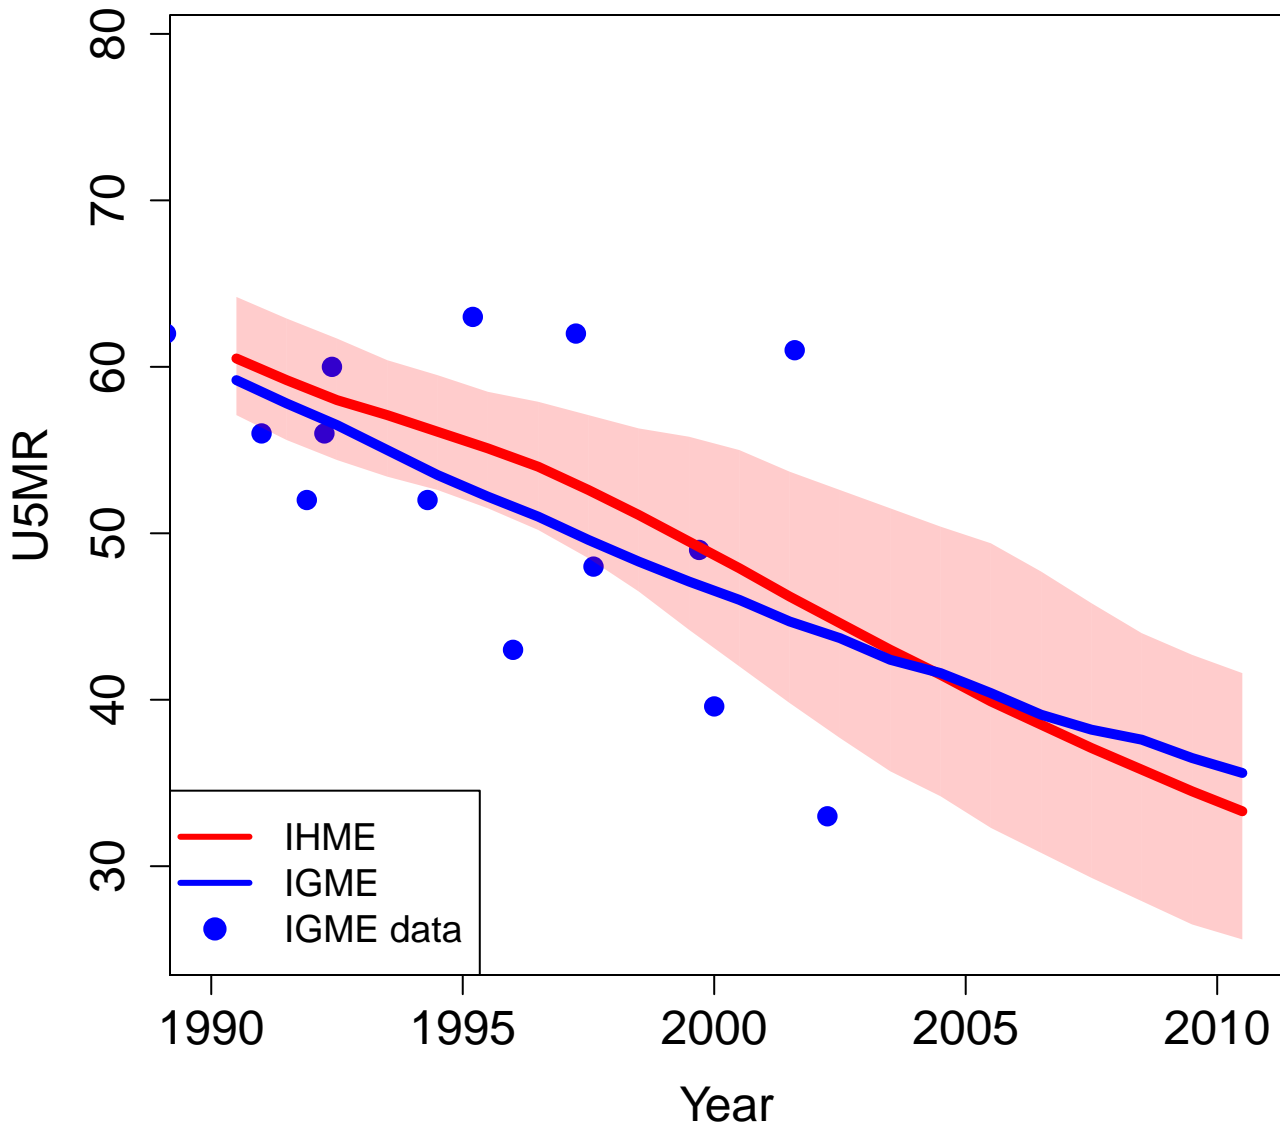



# CAR

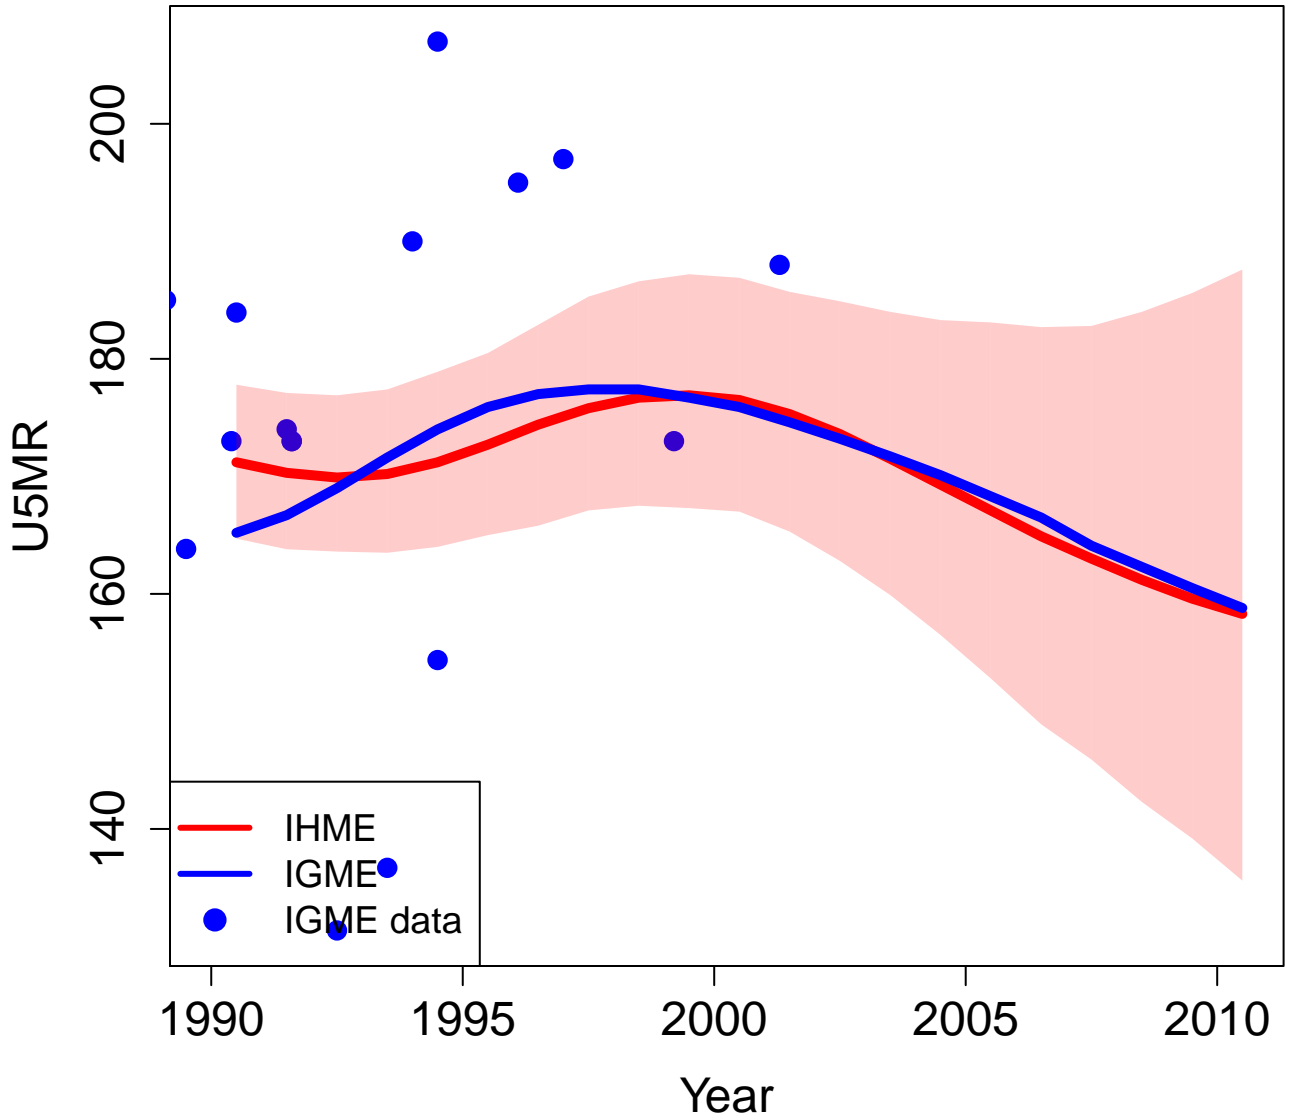

# Chad

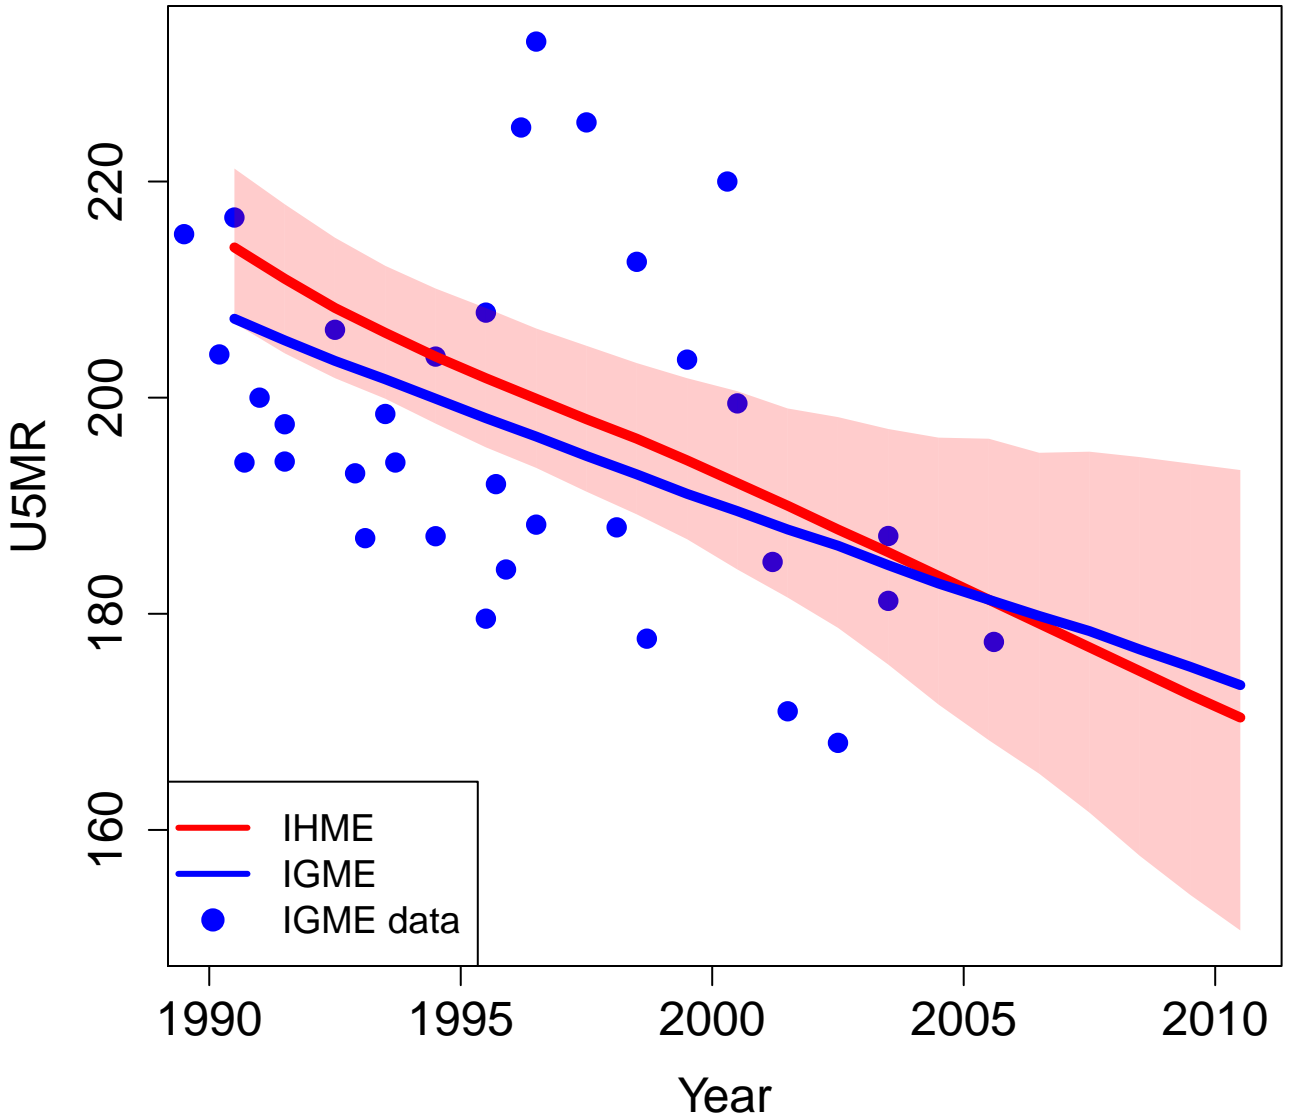

# Chile

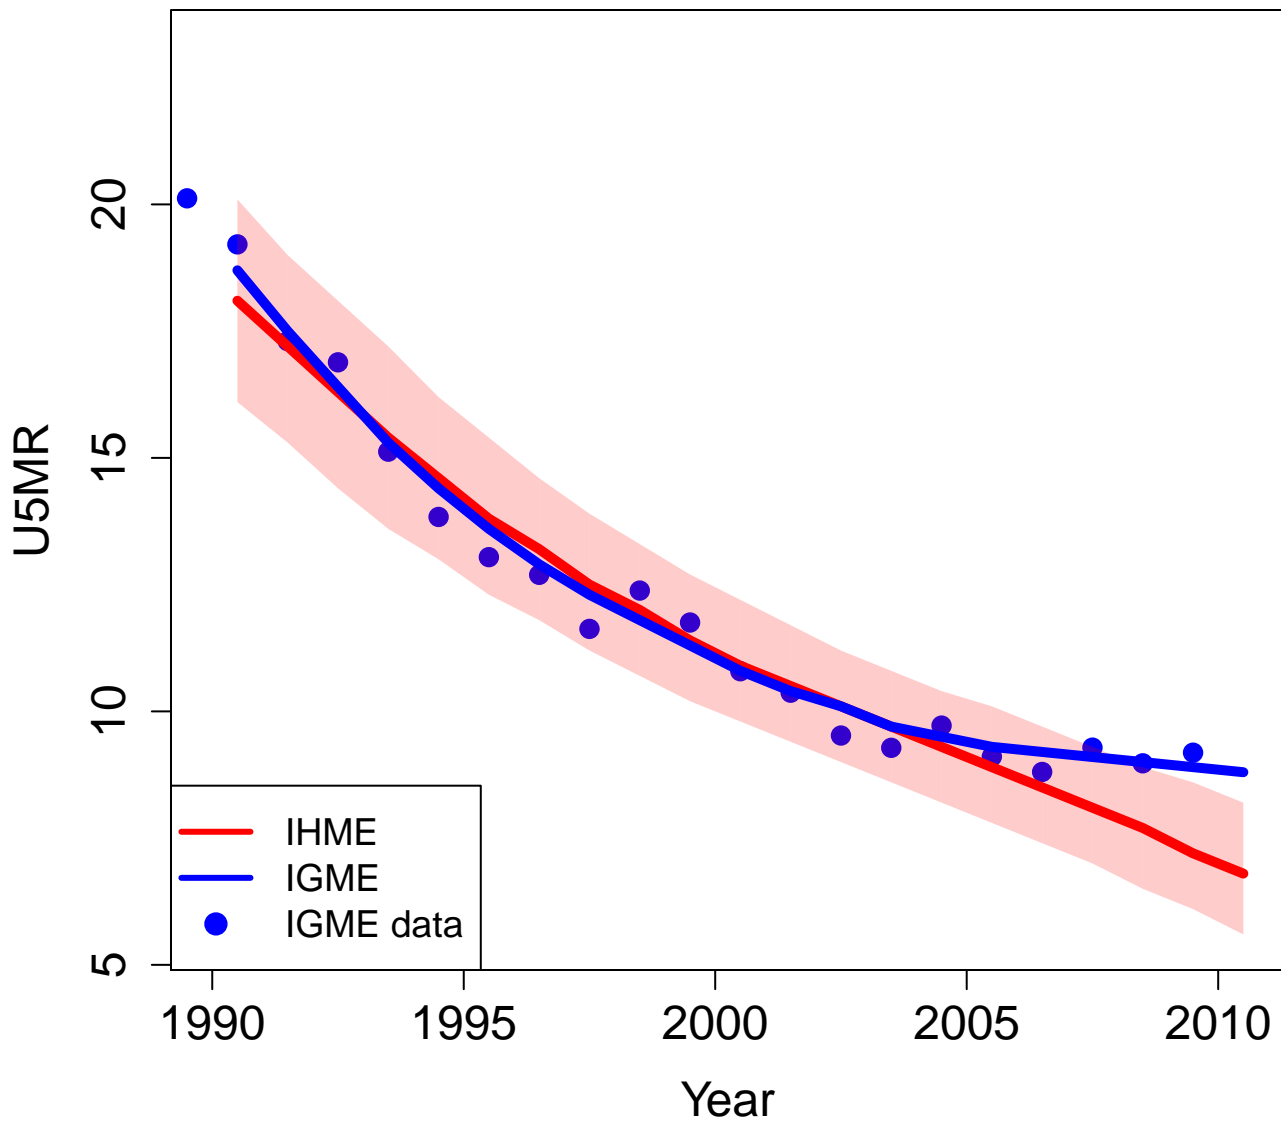

# China

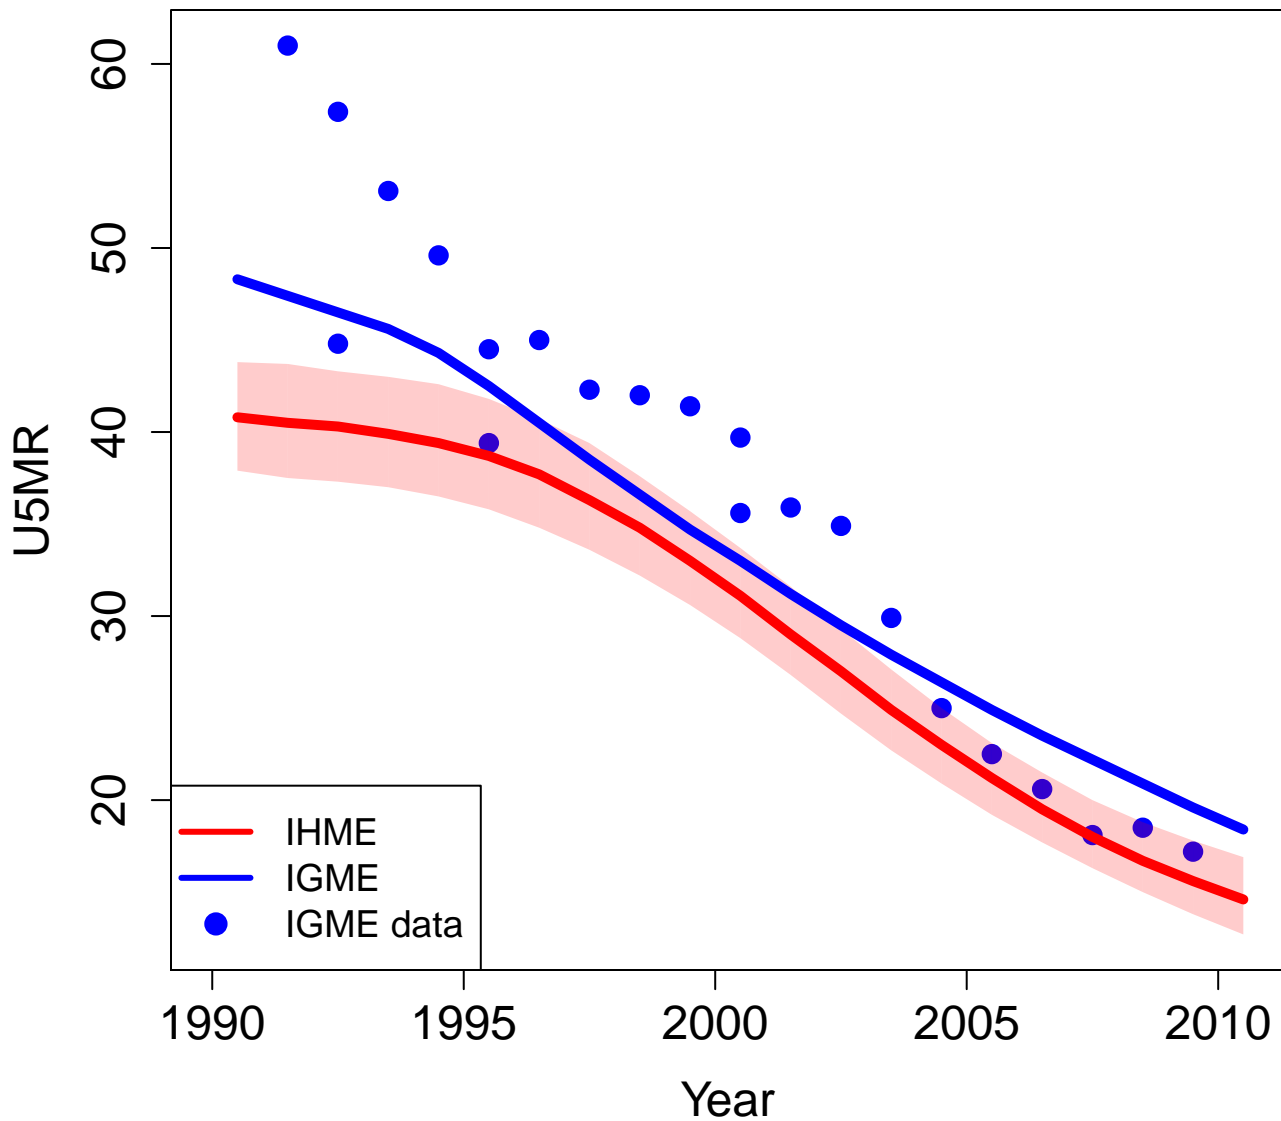

# Colombia

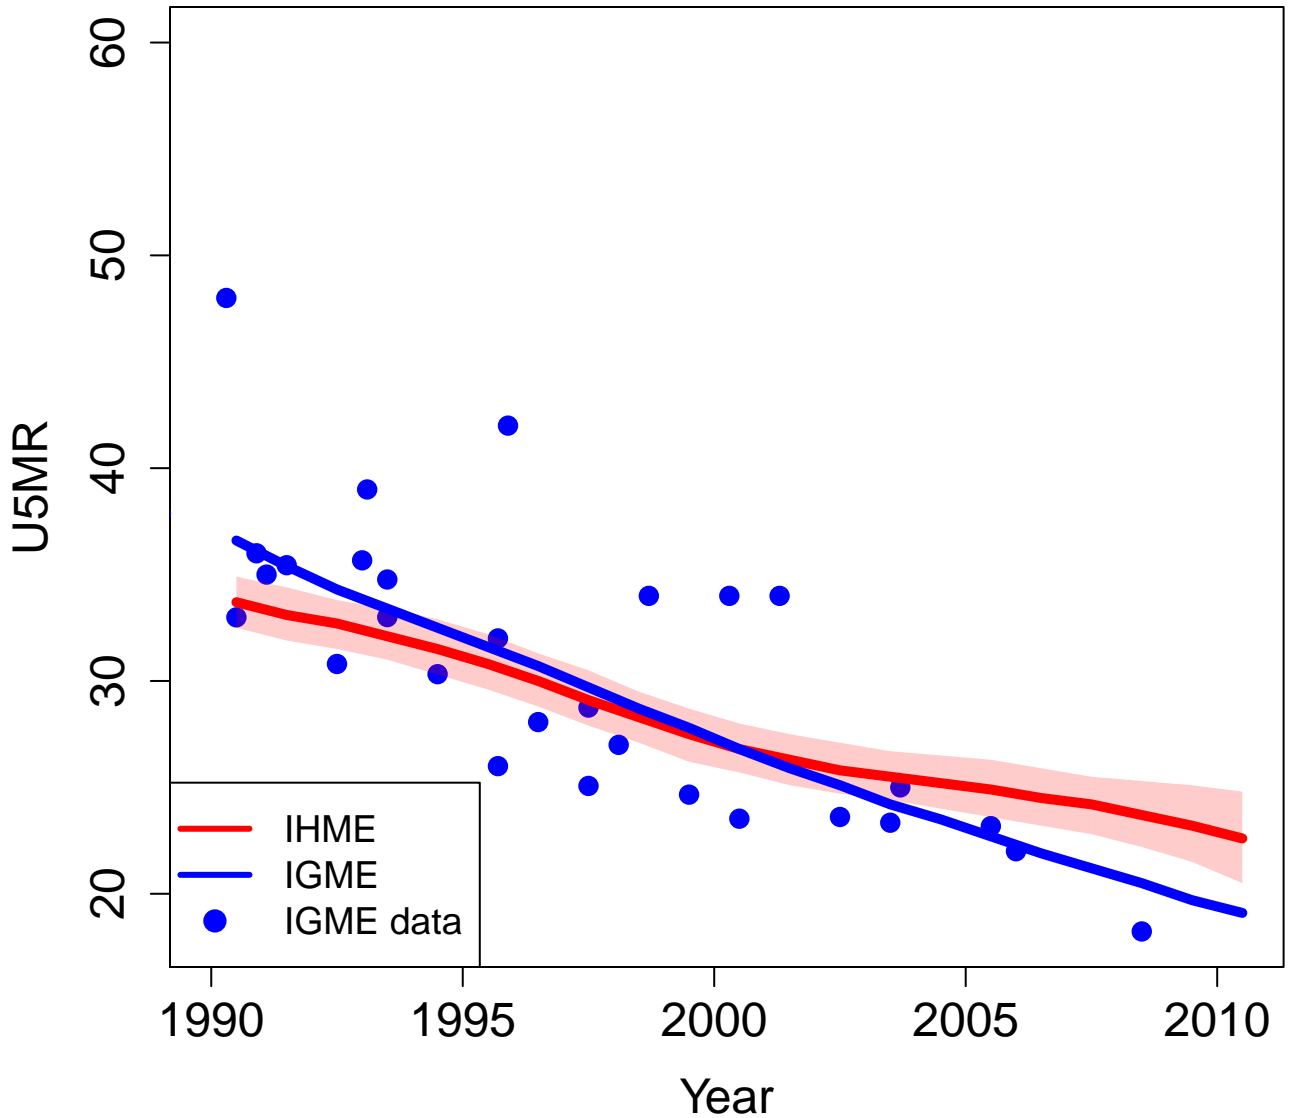

# Comoros

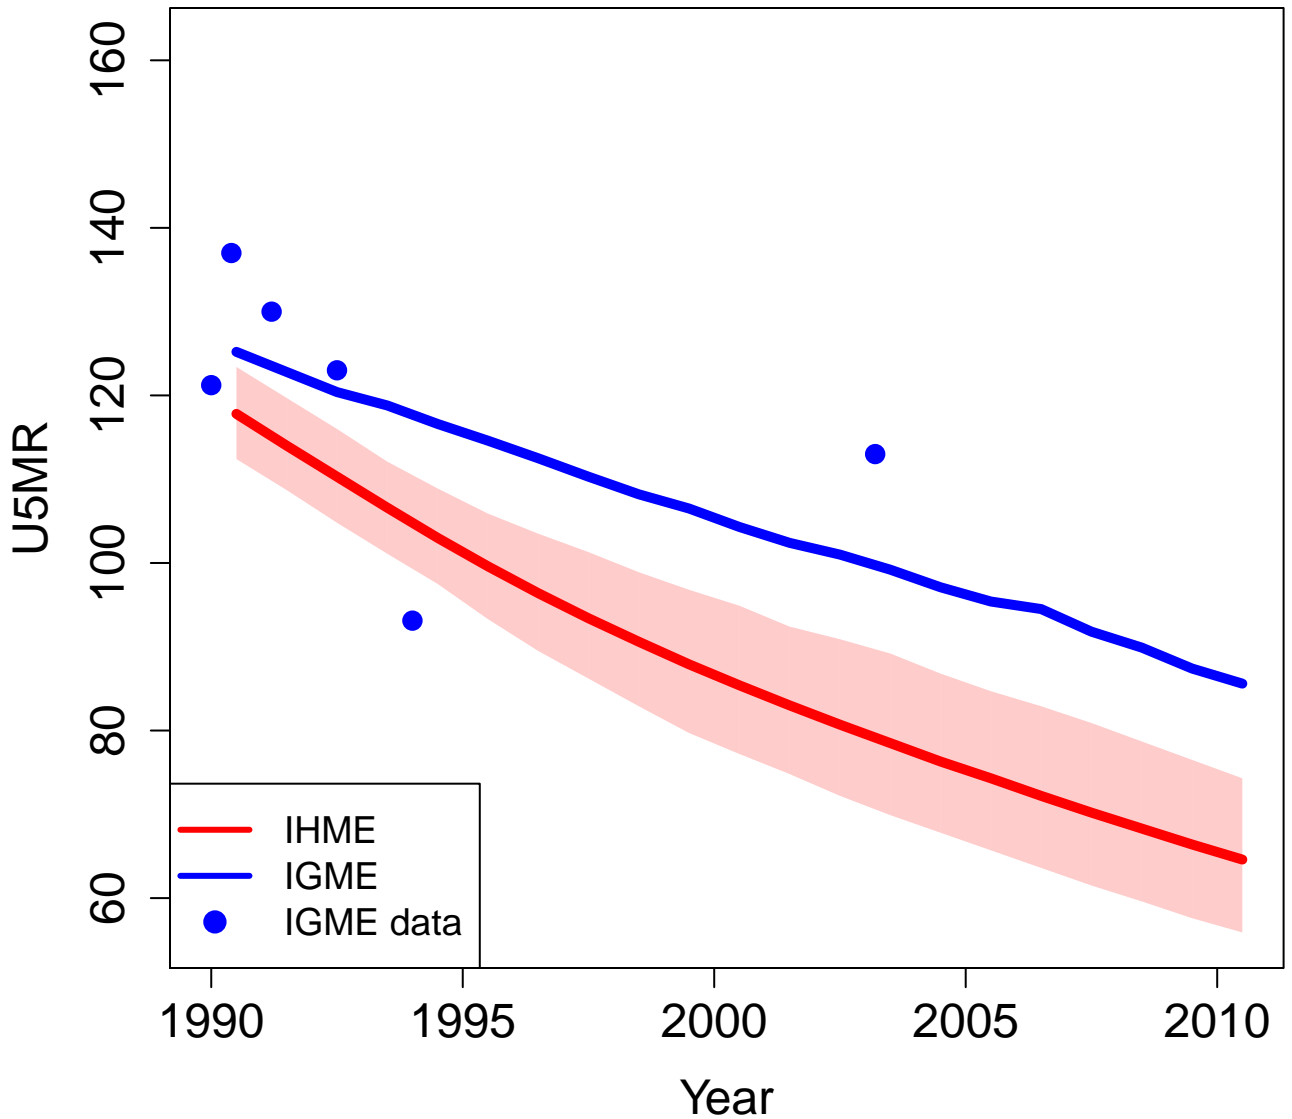

# Congo

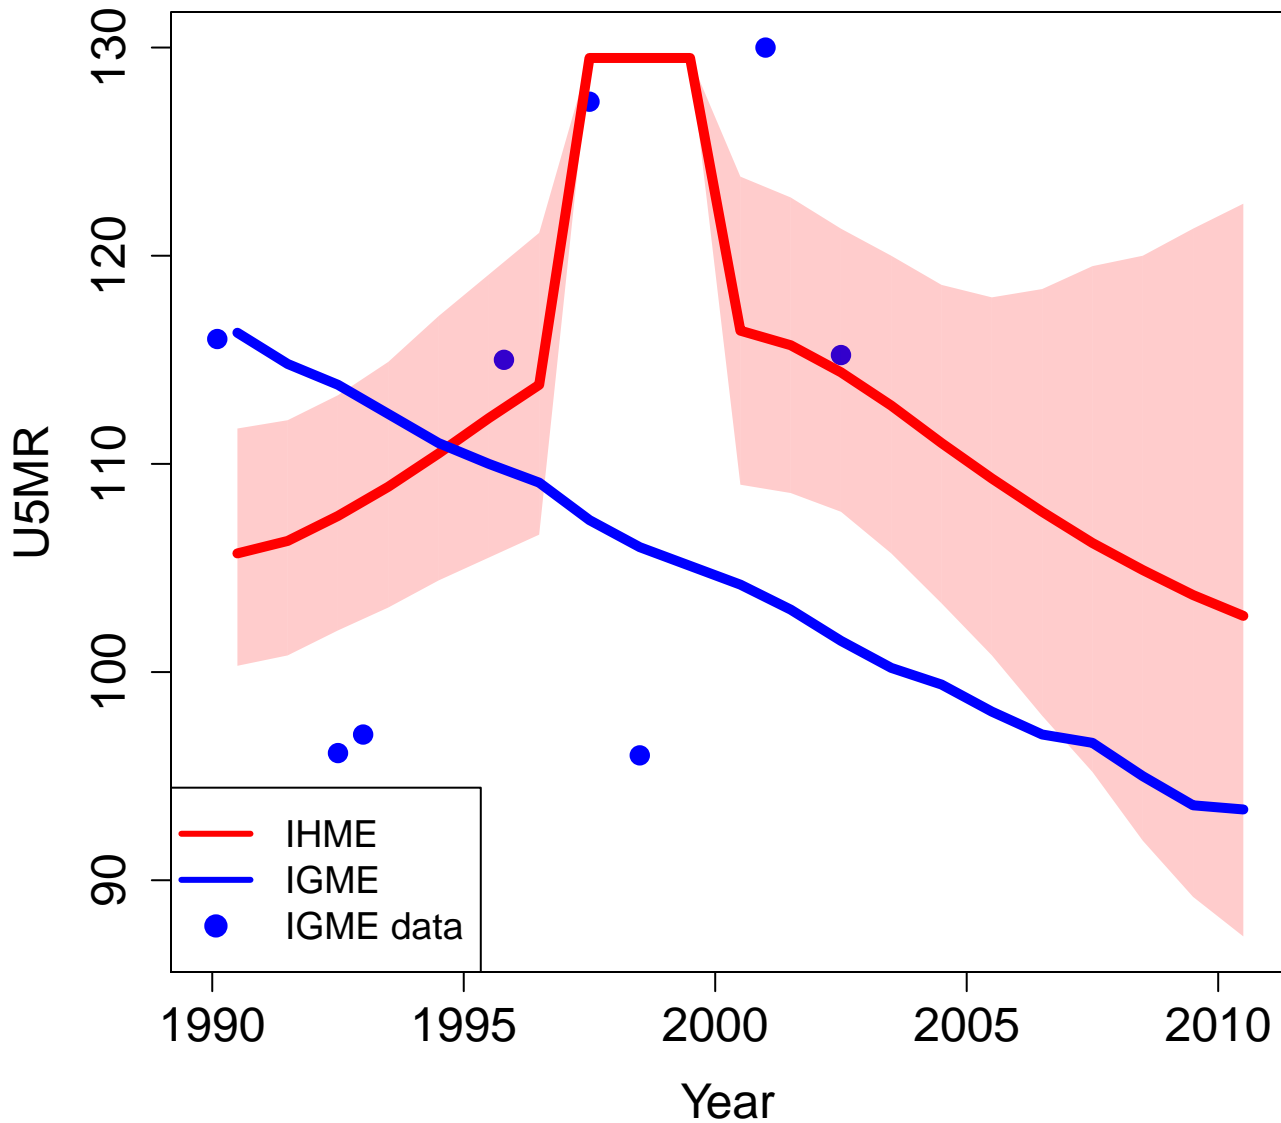

# Costa Rica

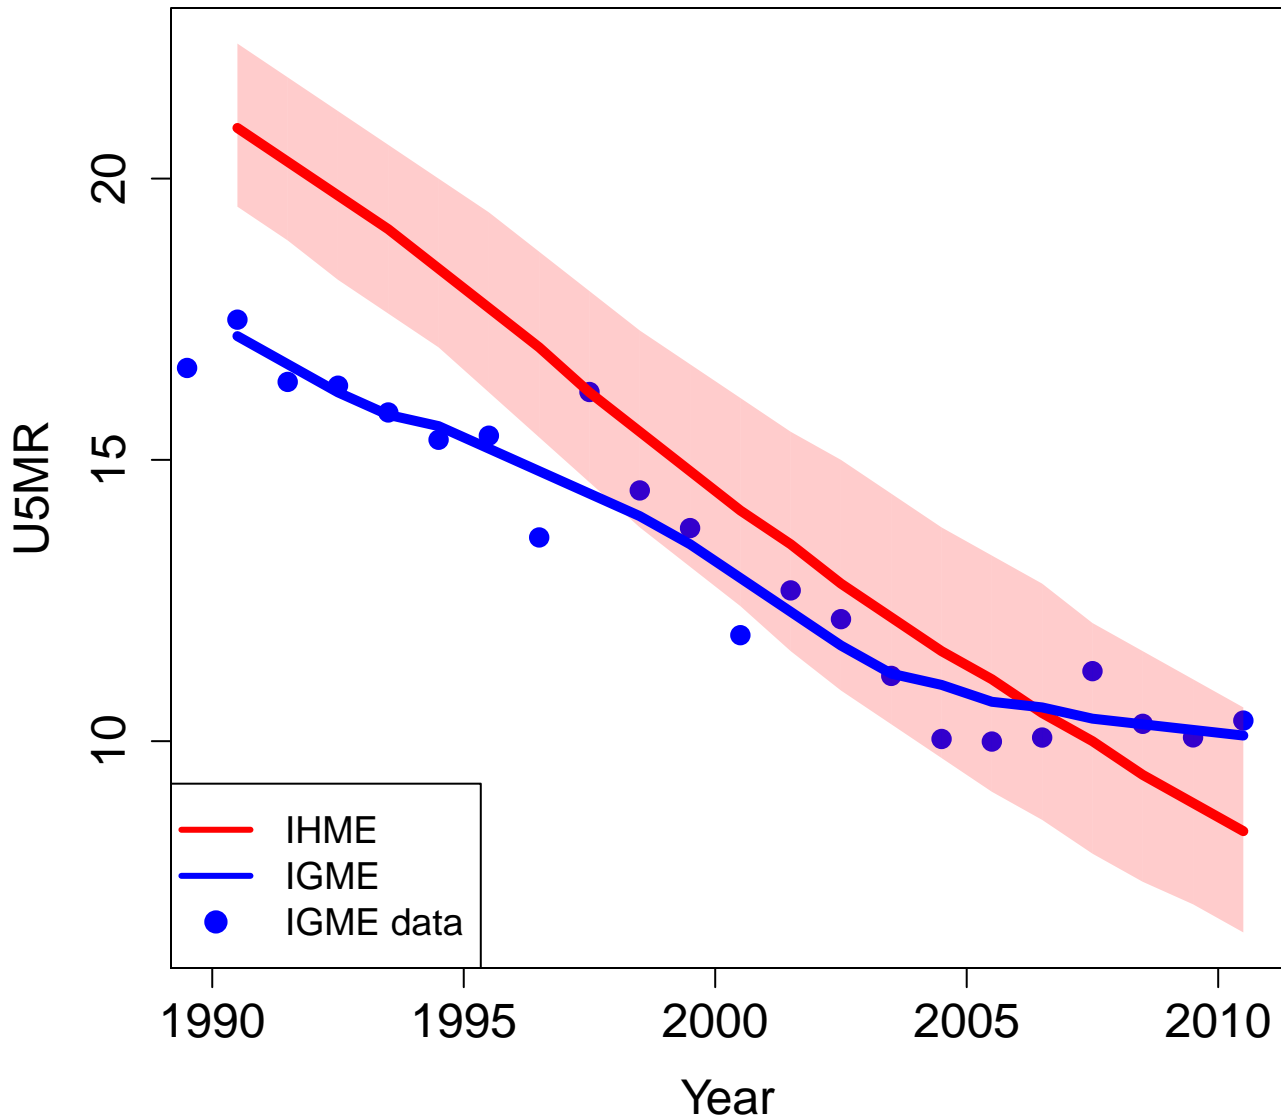



# Cote d'Ivoire

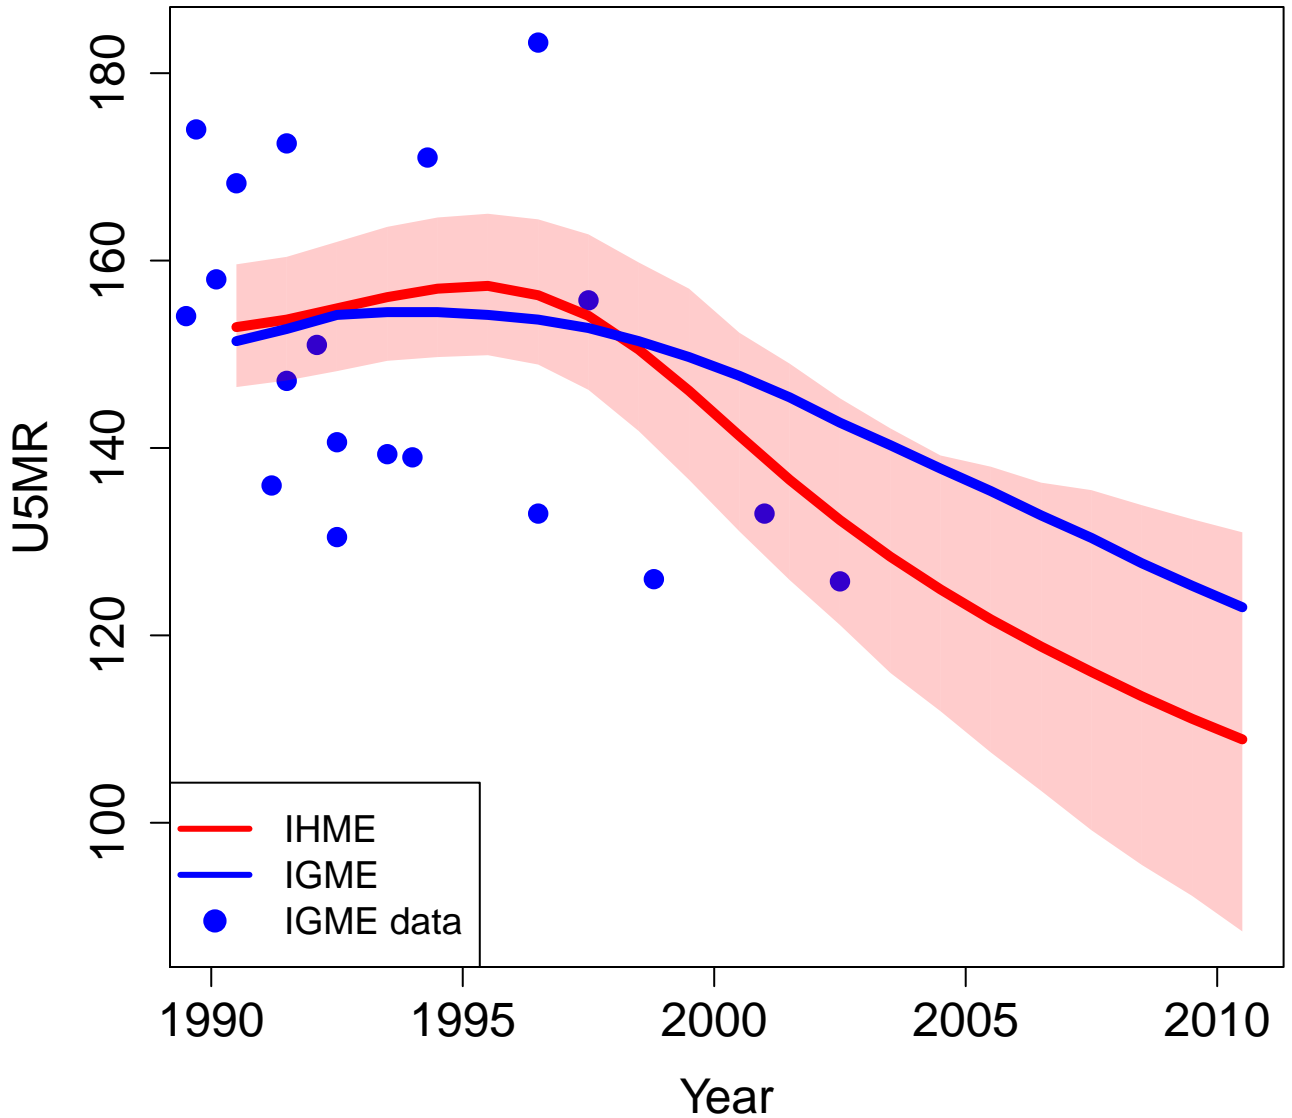

# Croatia

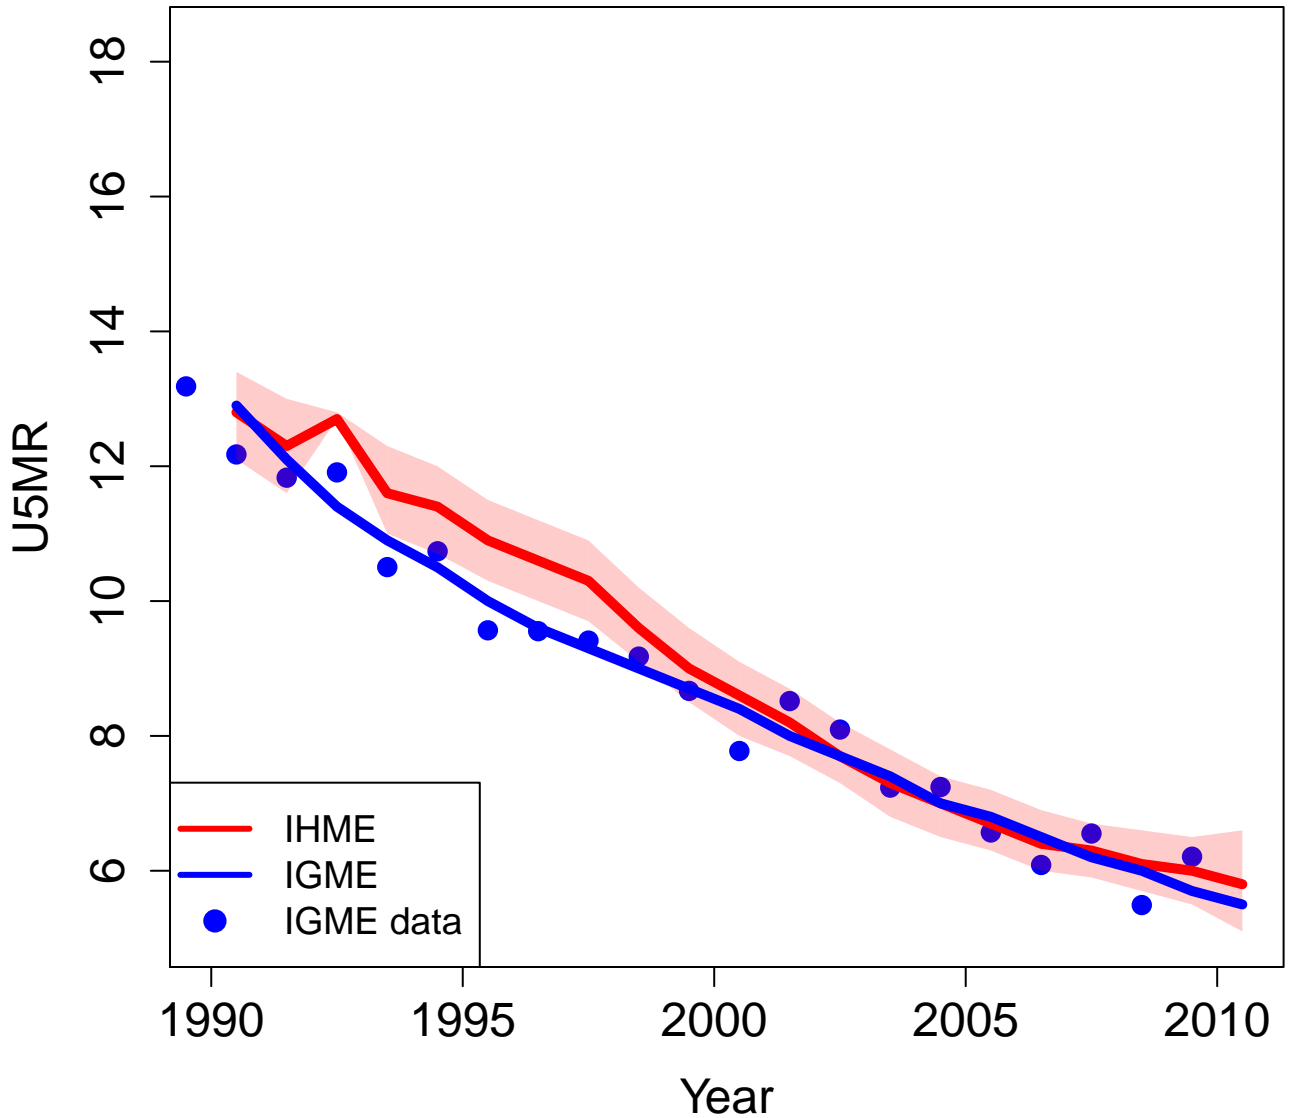

# Cuba

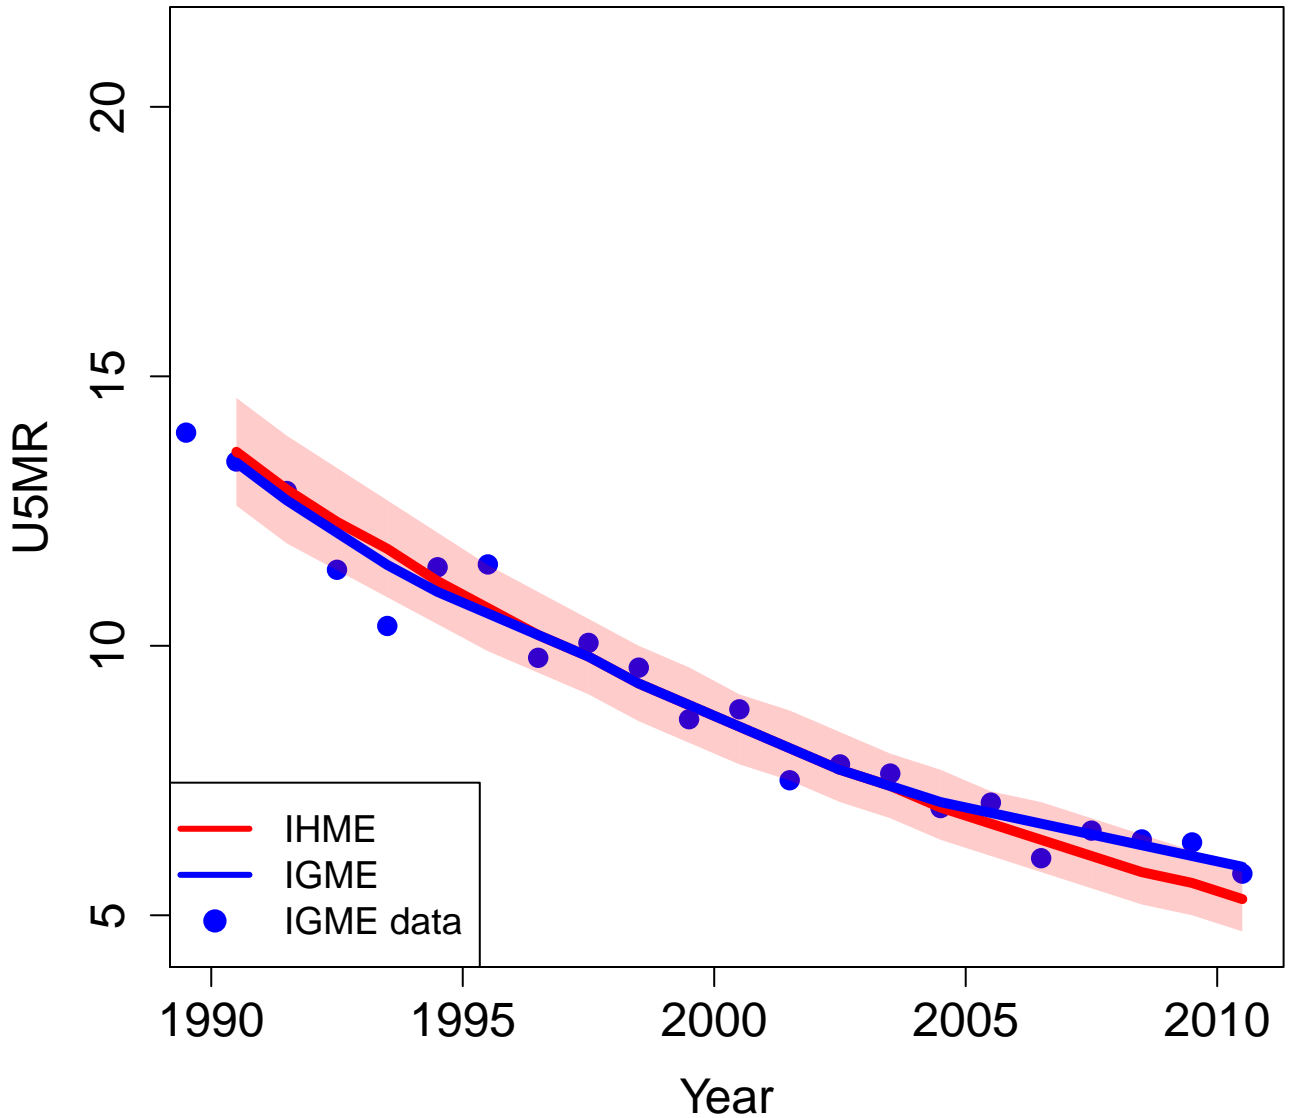

# Cyprus

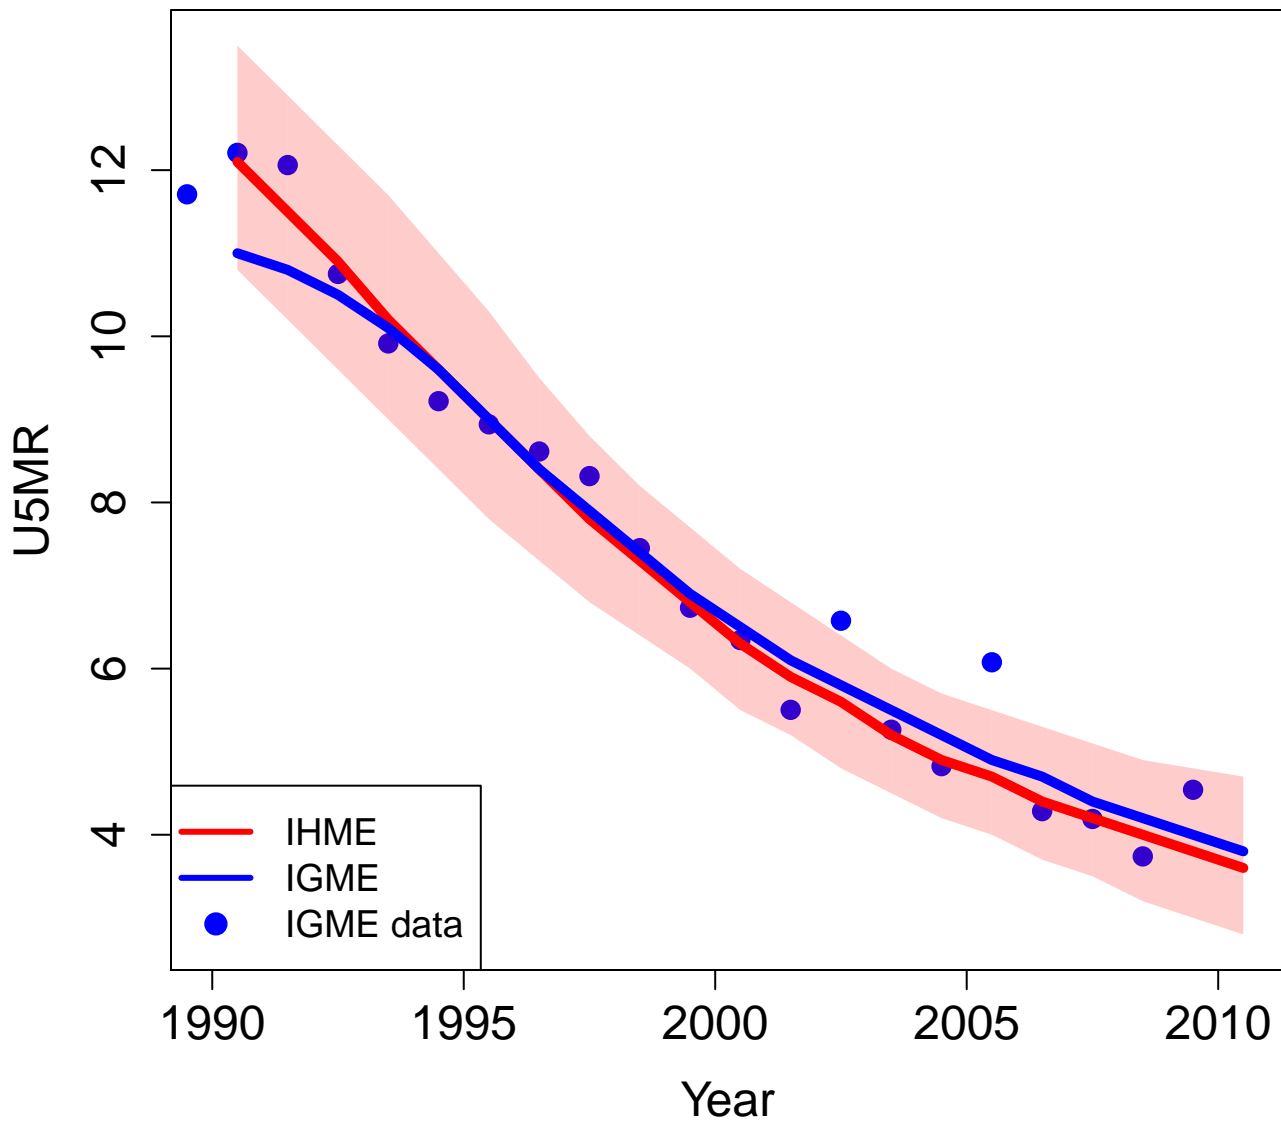

# Czech Republic

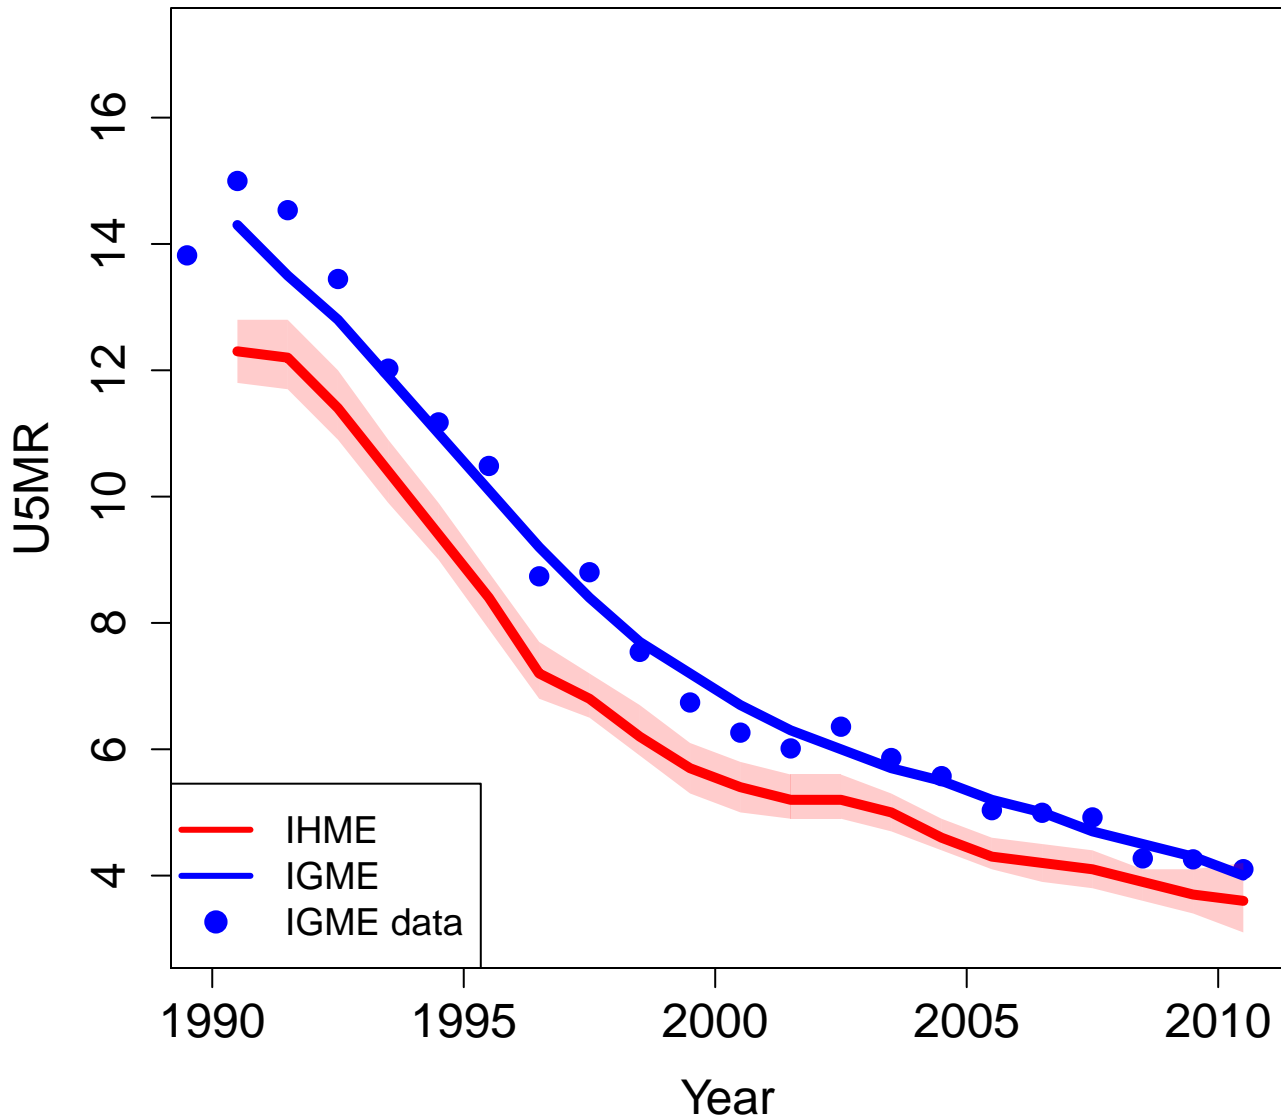

# North Korea

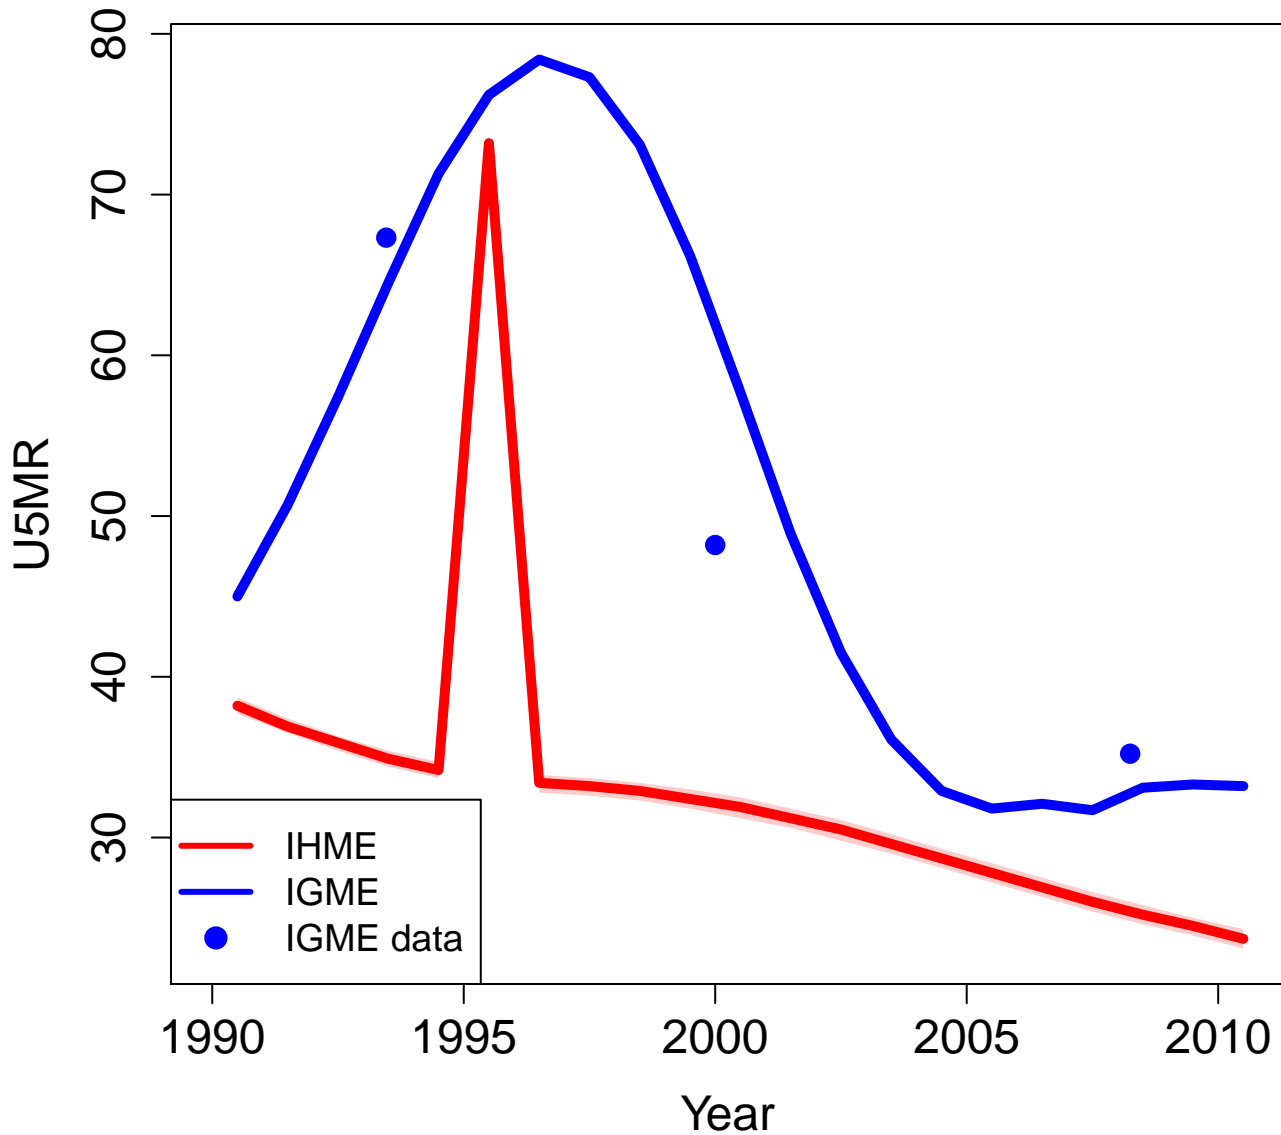

# DRC

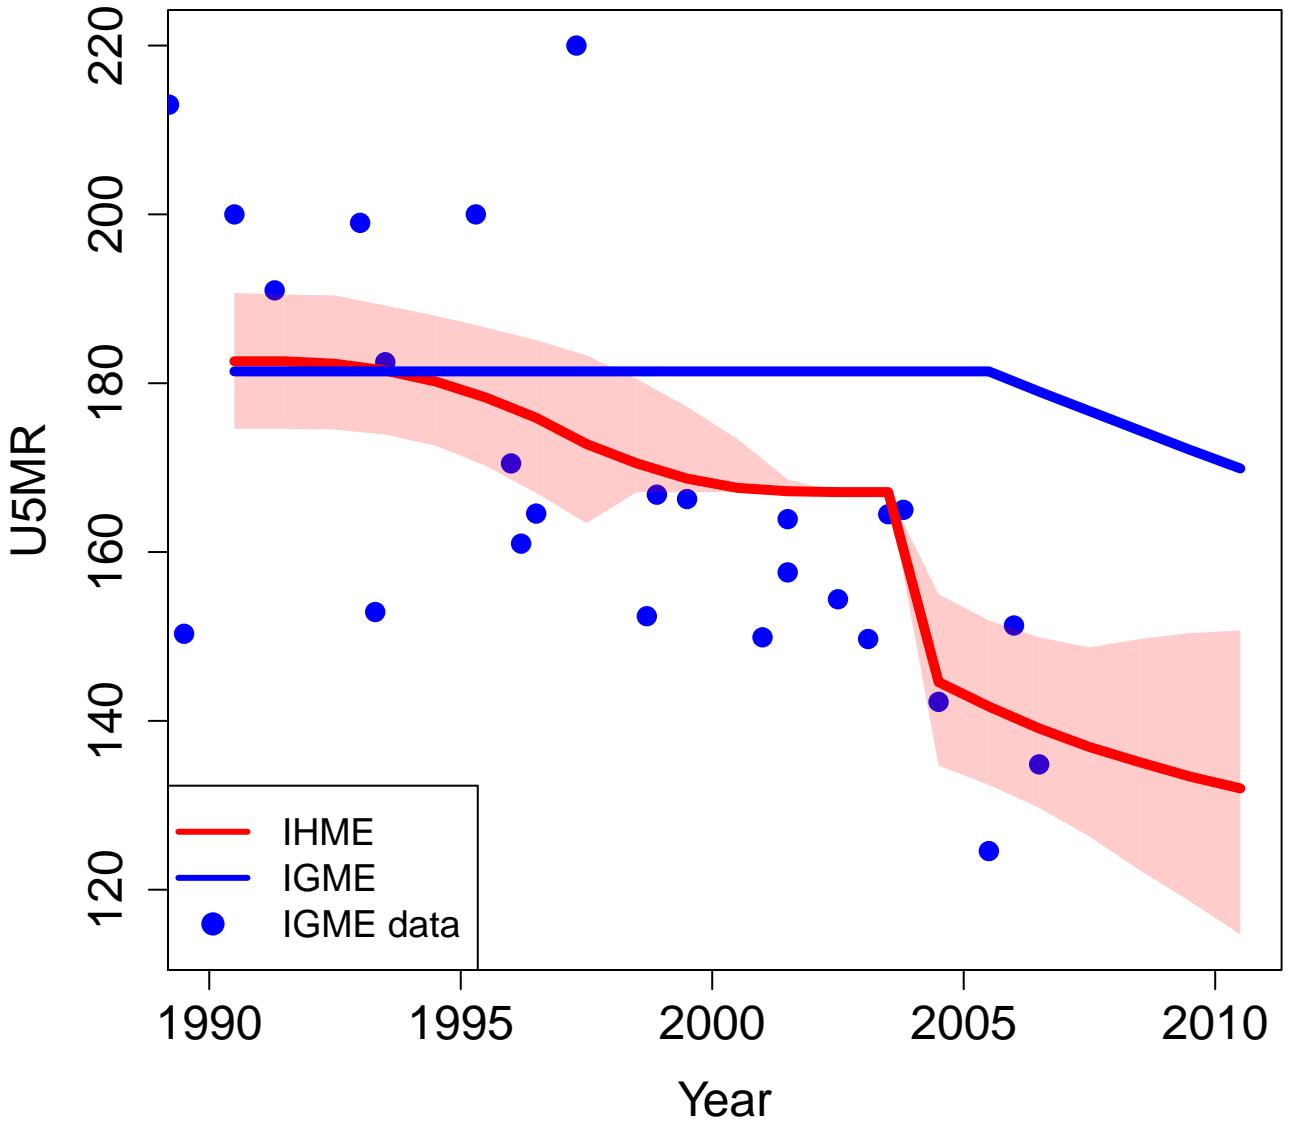

# Denmark

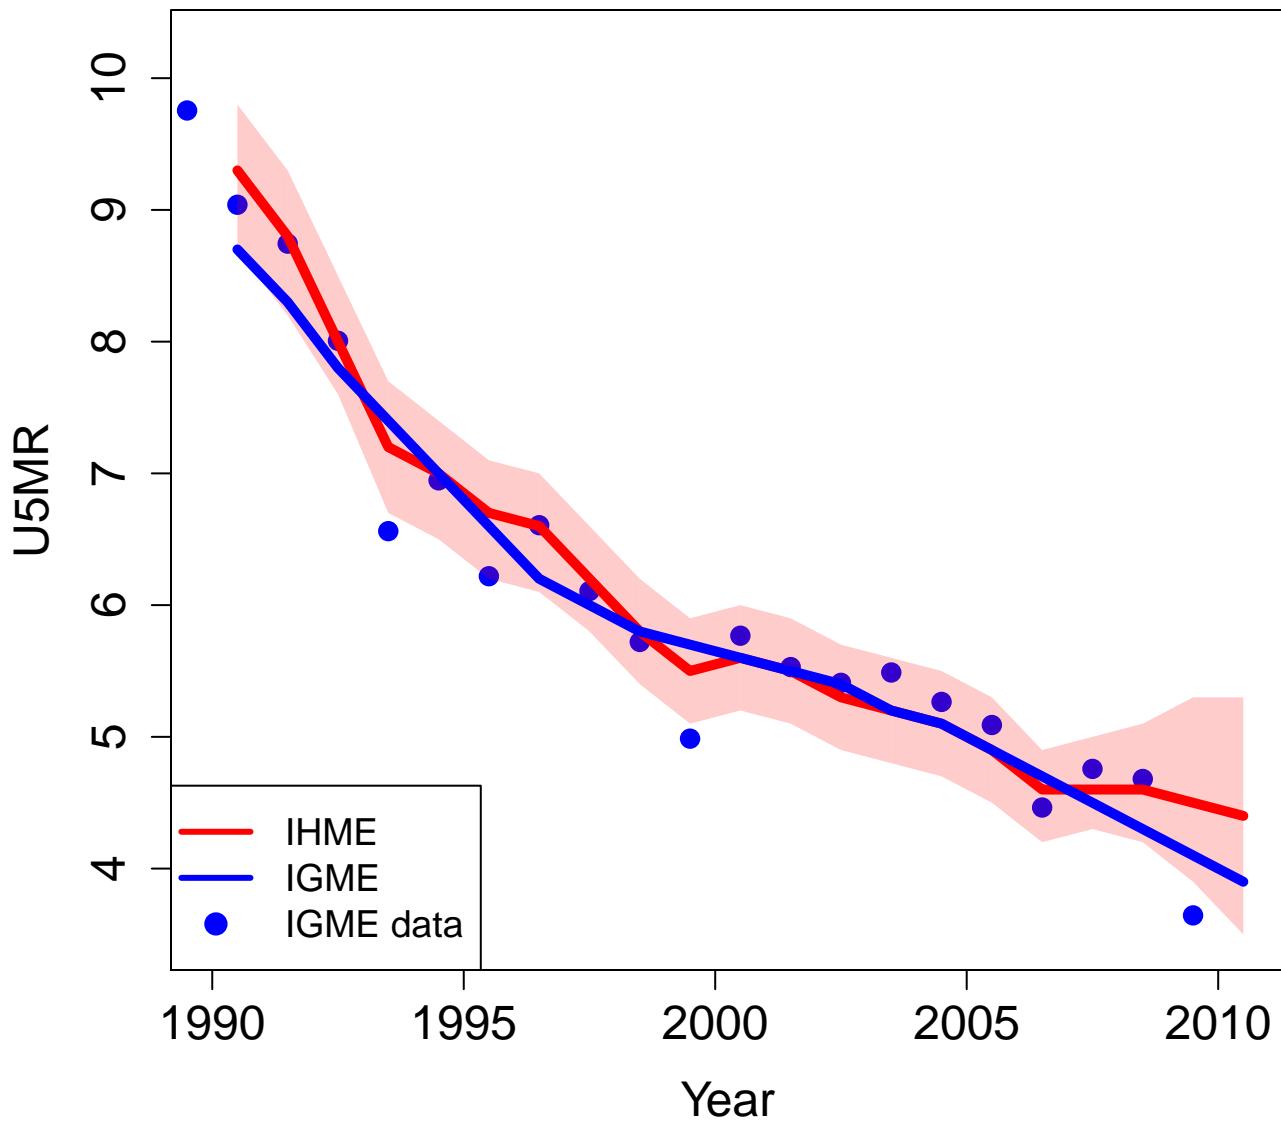



# Djibouti

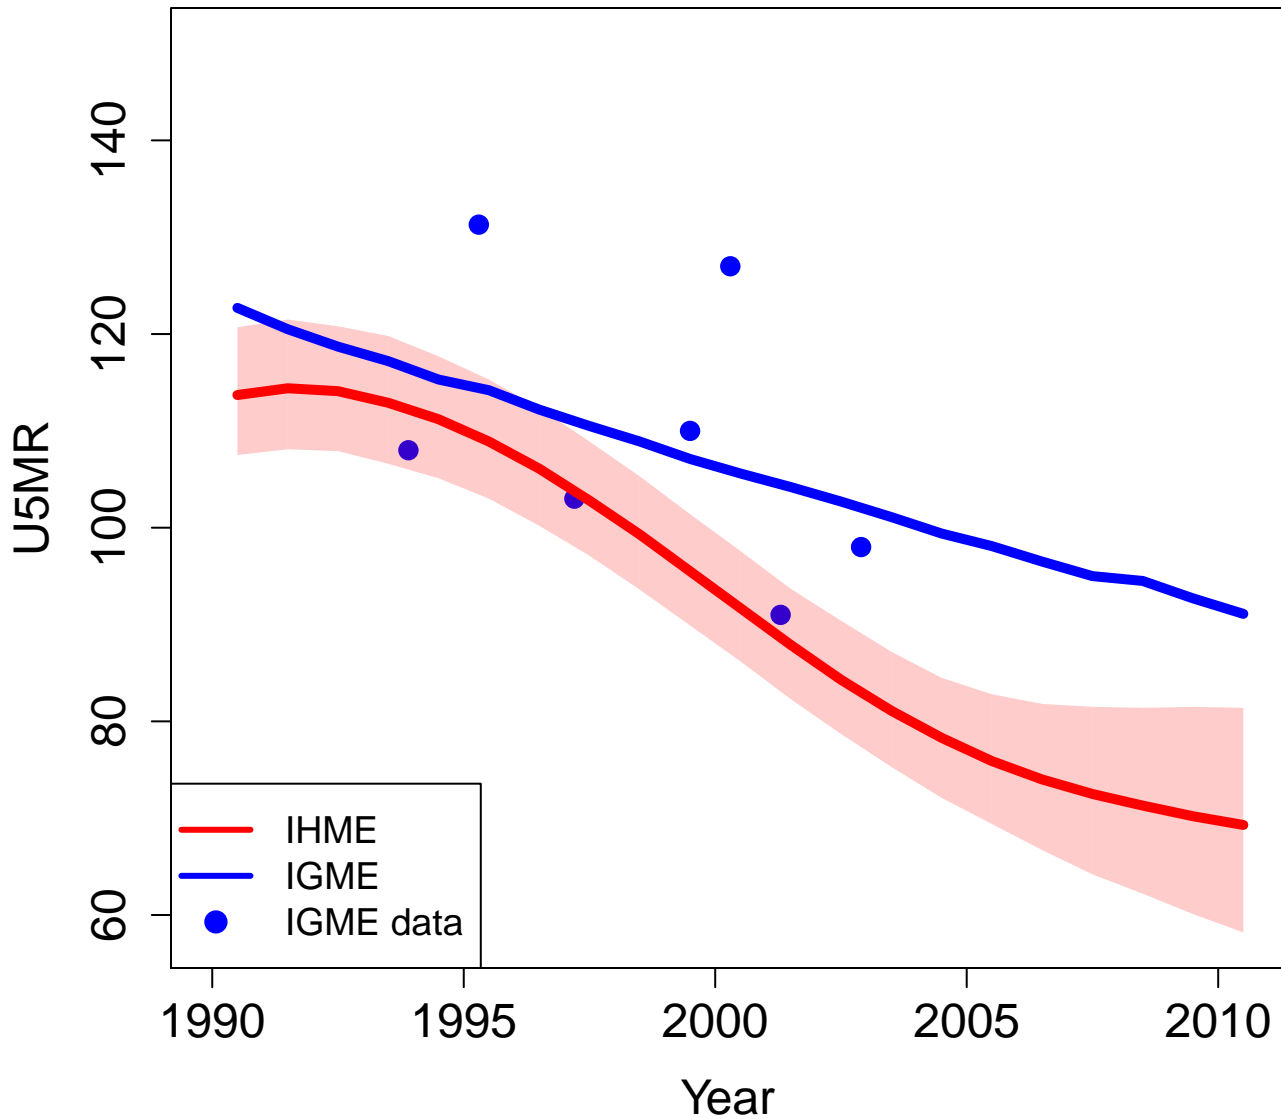

# Dominica

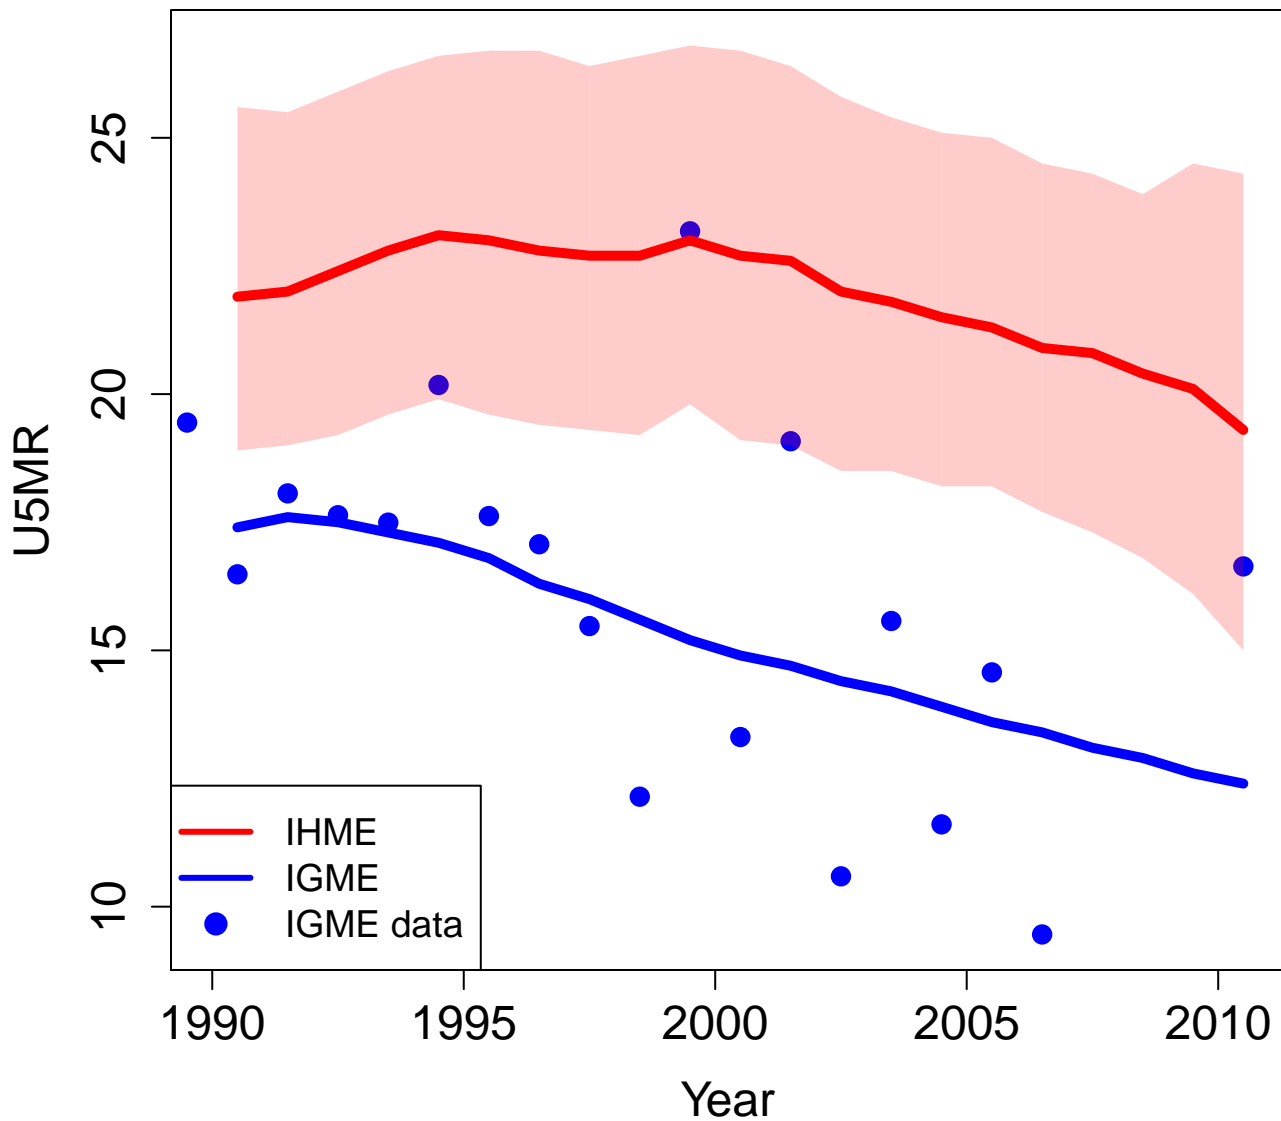

# Dominican Republic

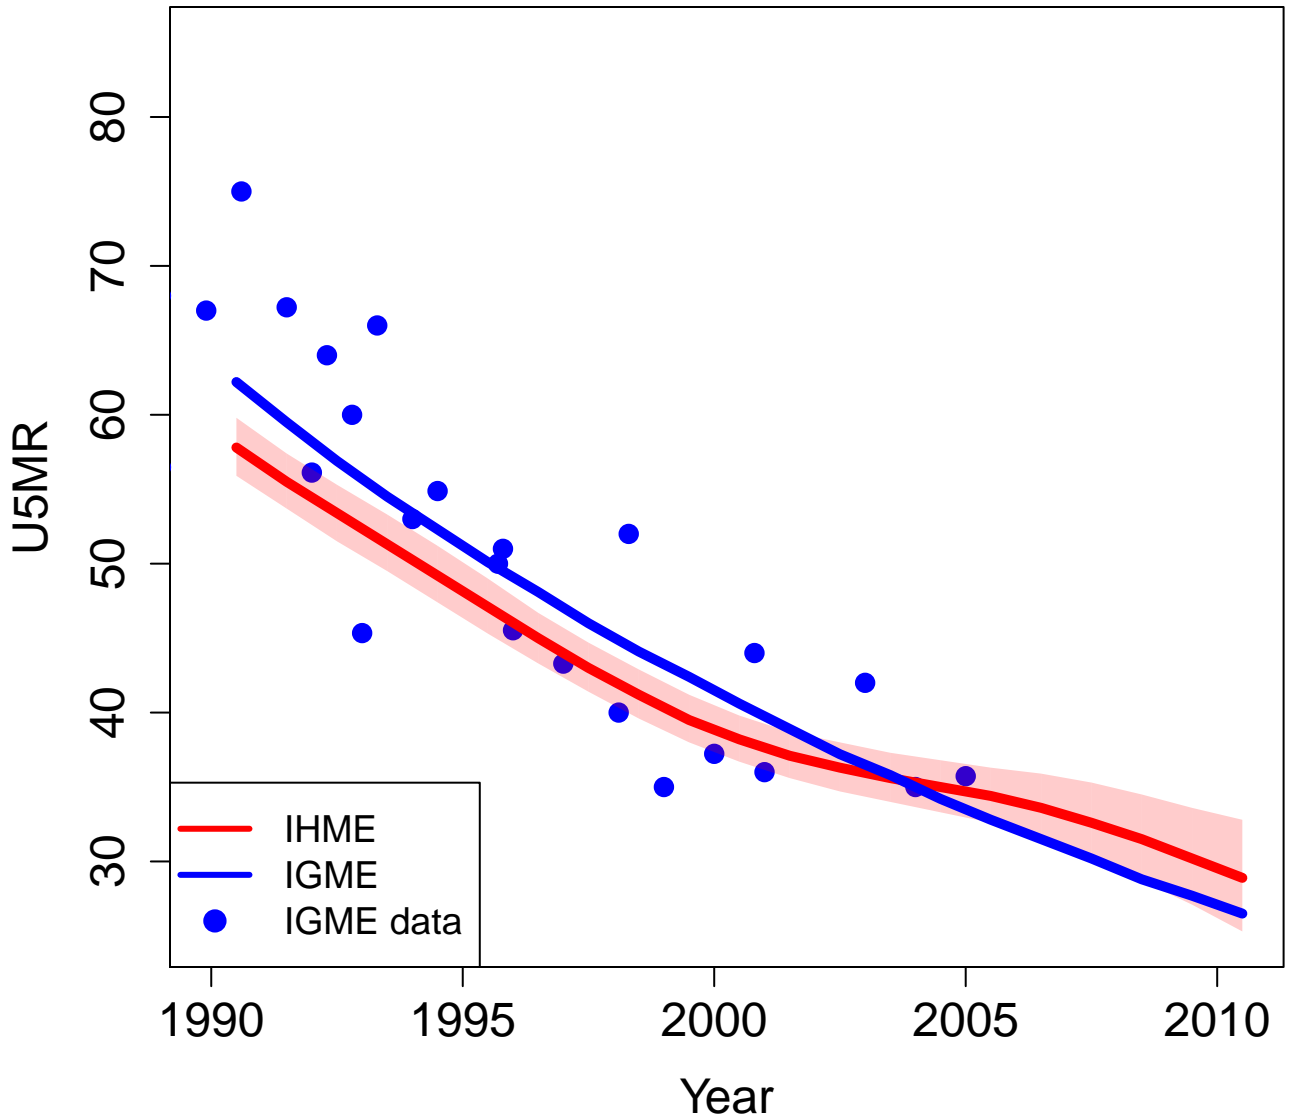

# Ecuador

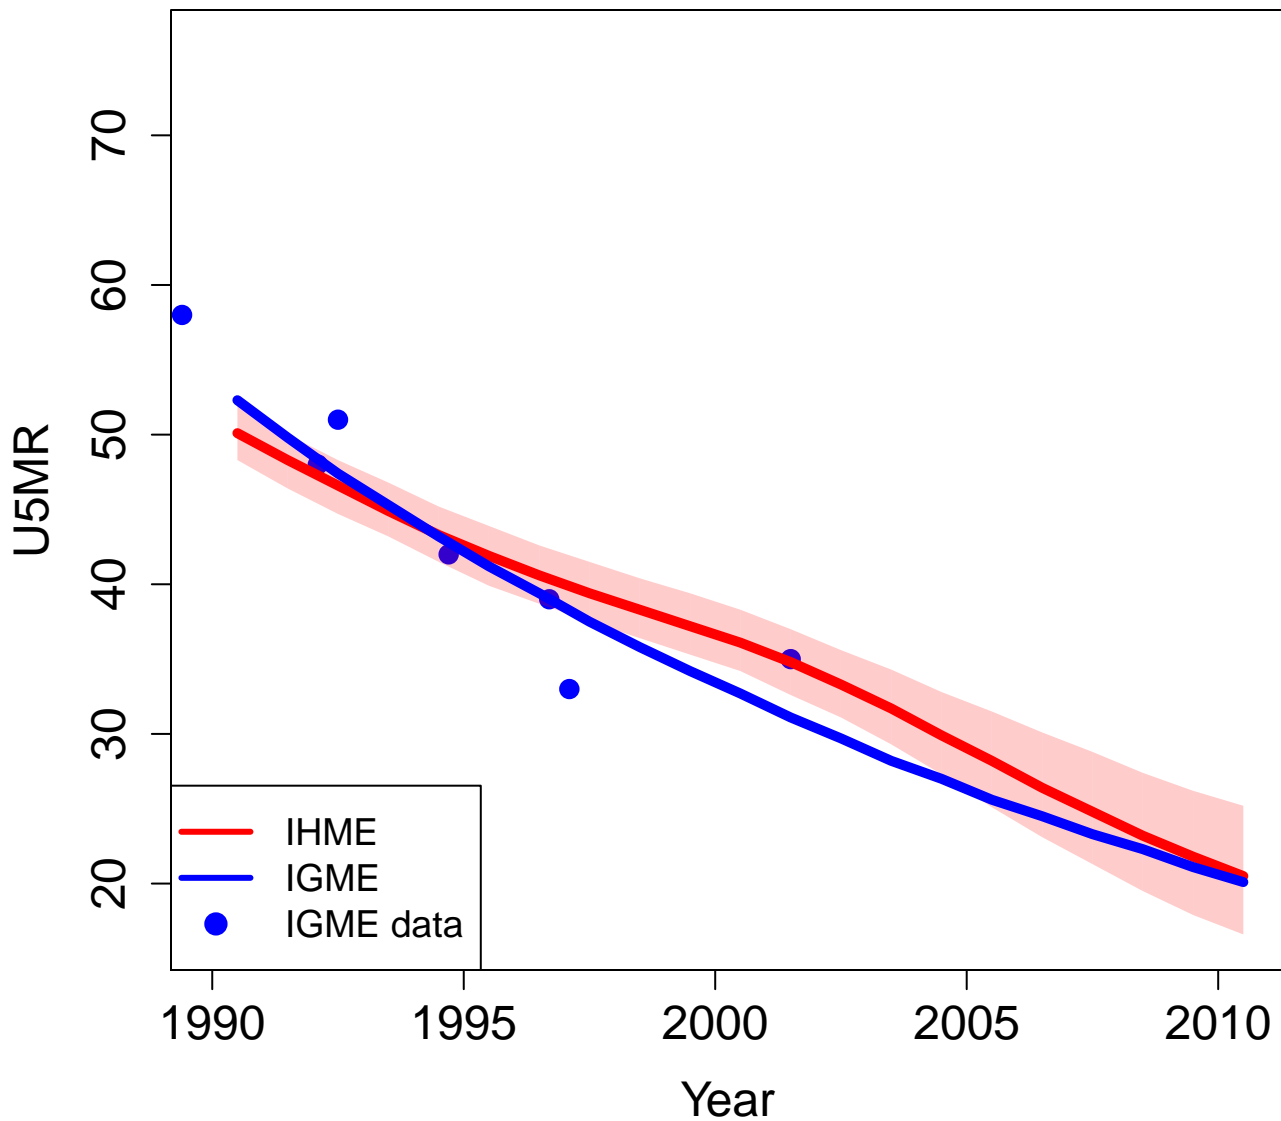

# Egypt

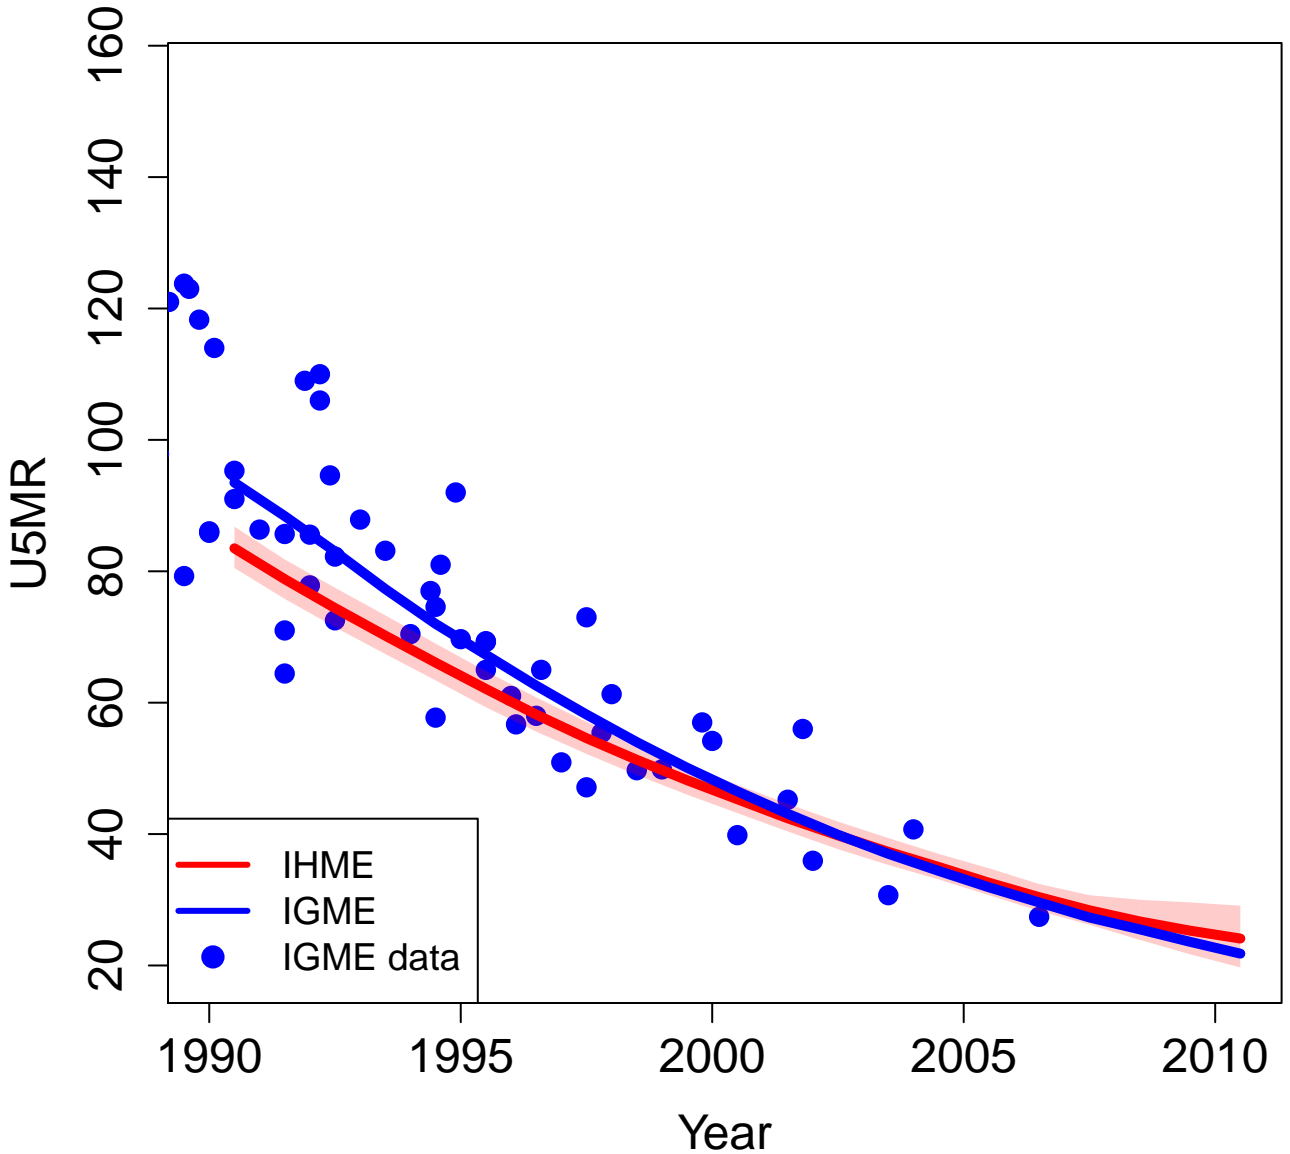

# El Salvador

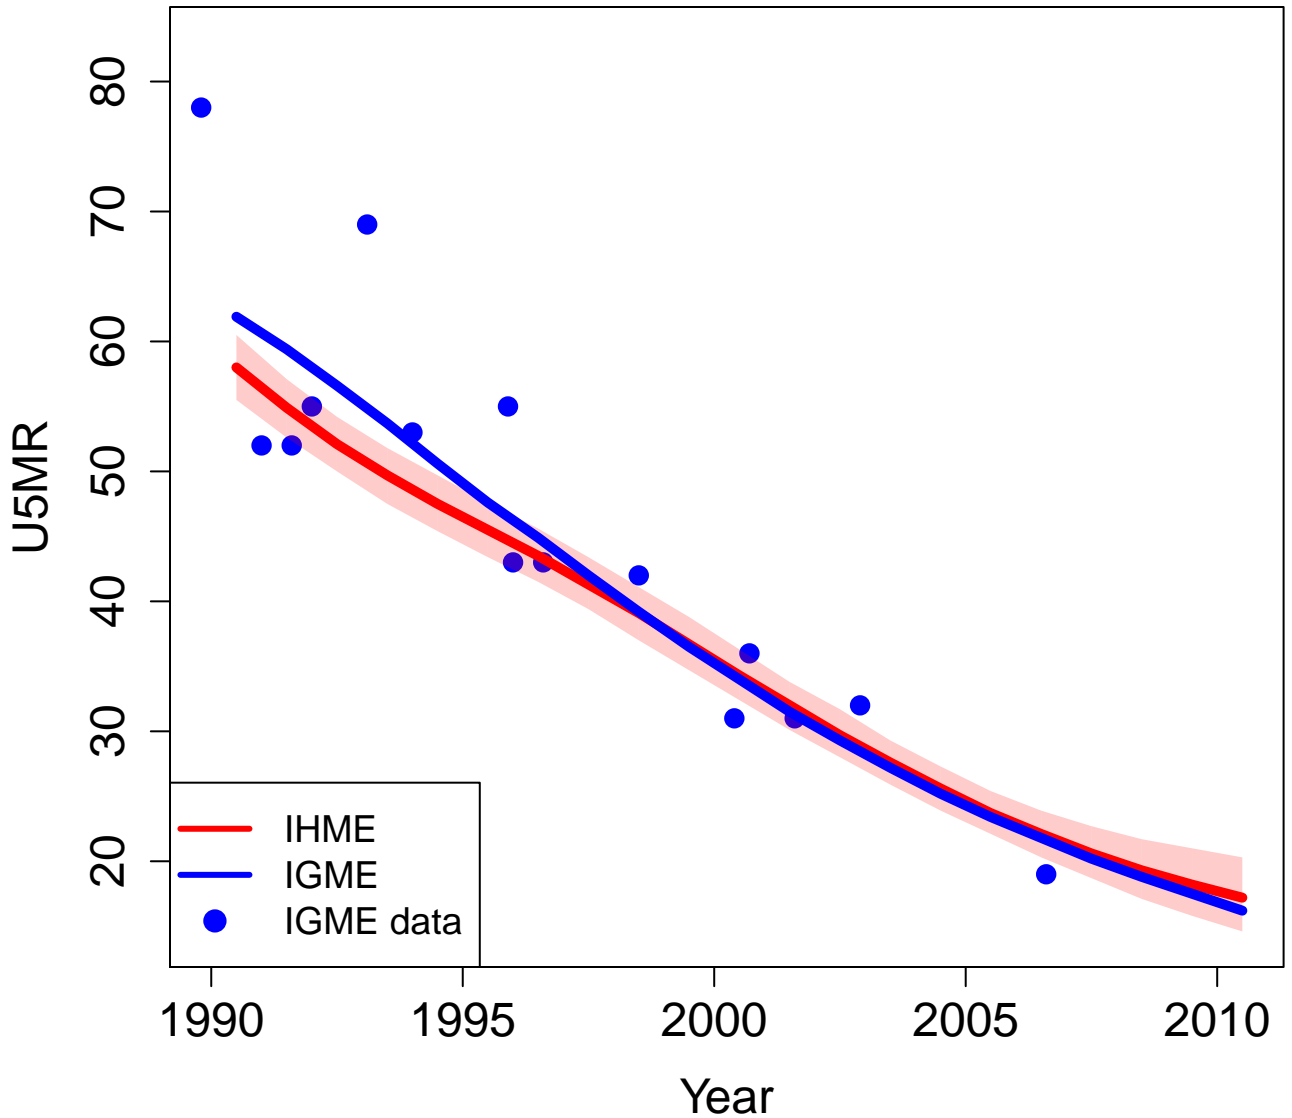

# Equatorial Guinea

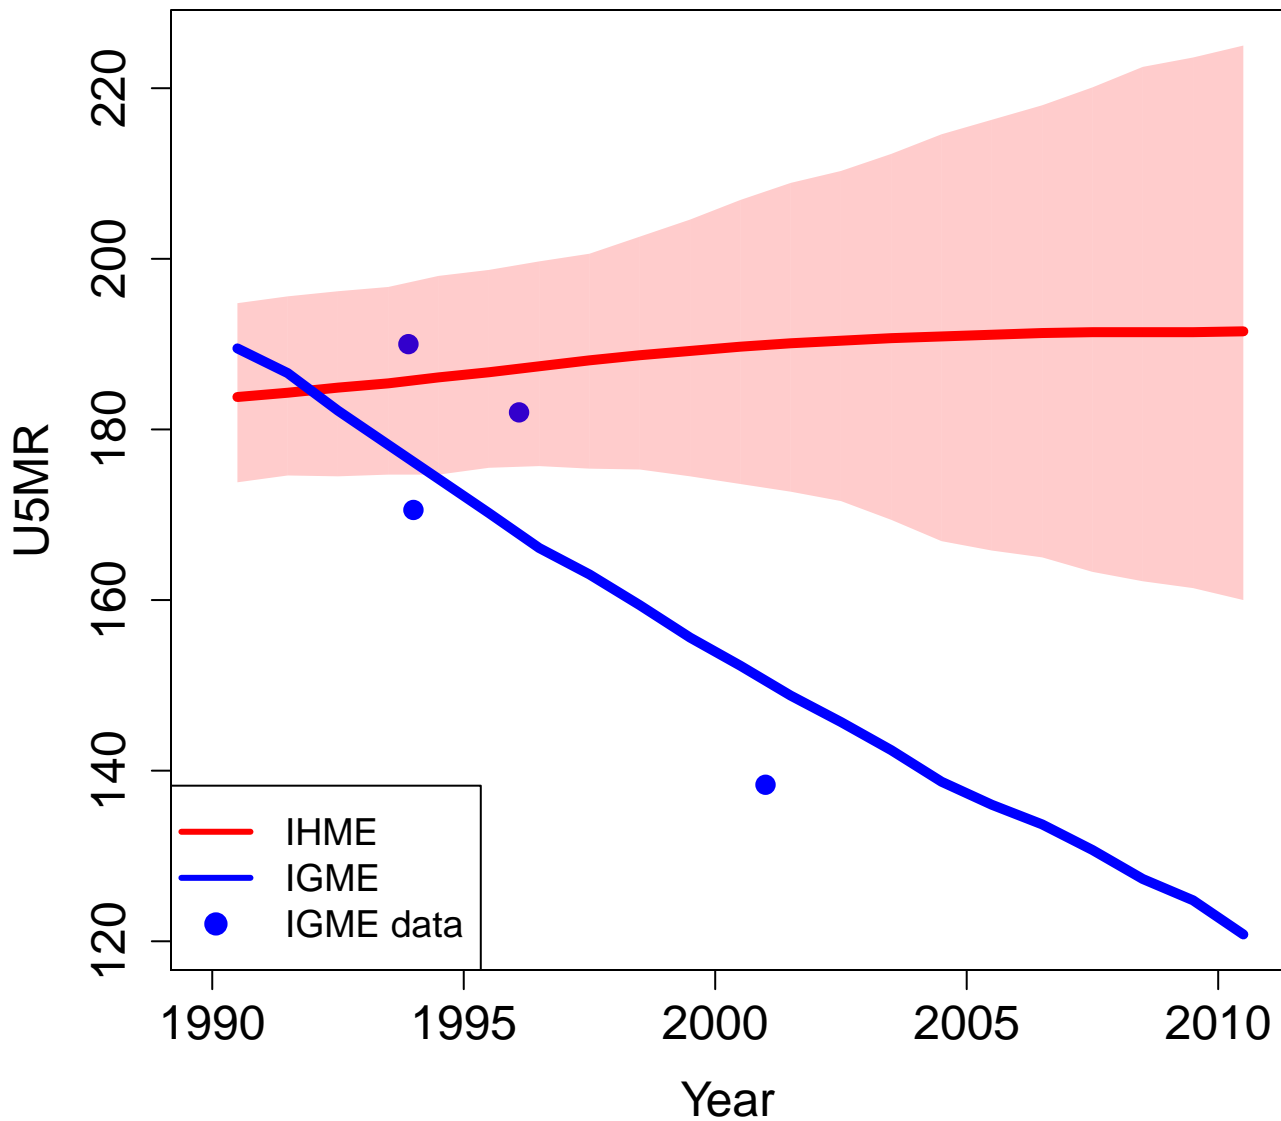

# Eritrea

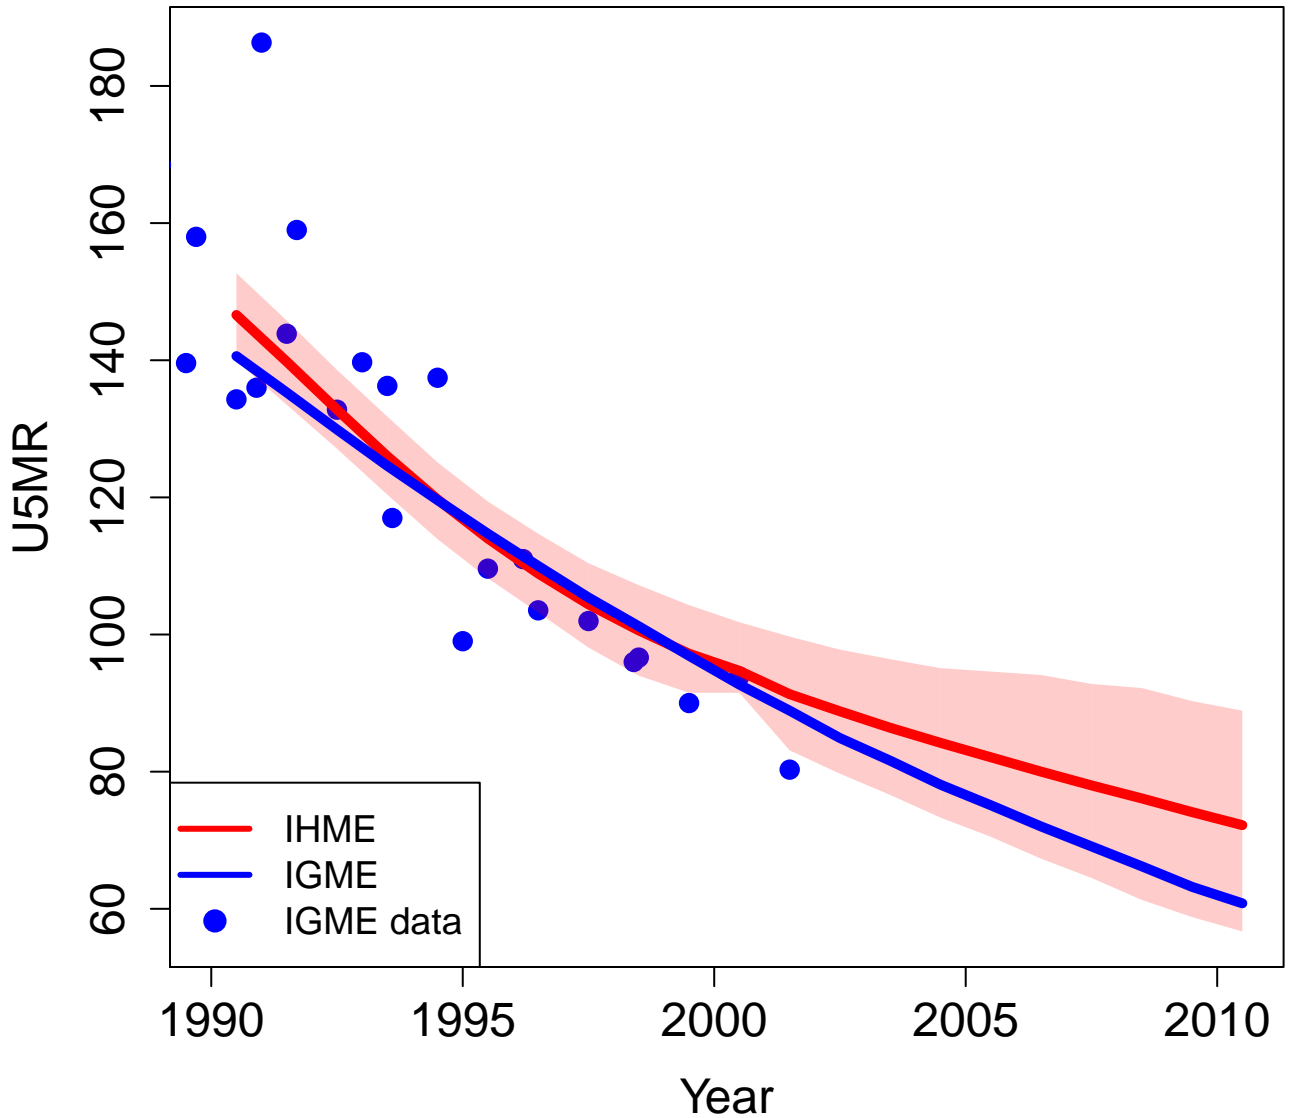



# Estonia

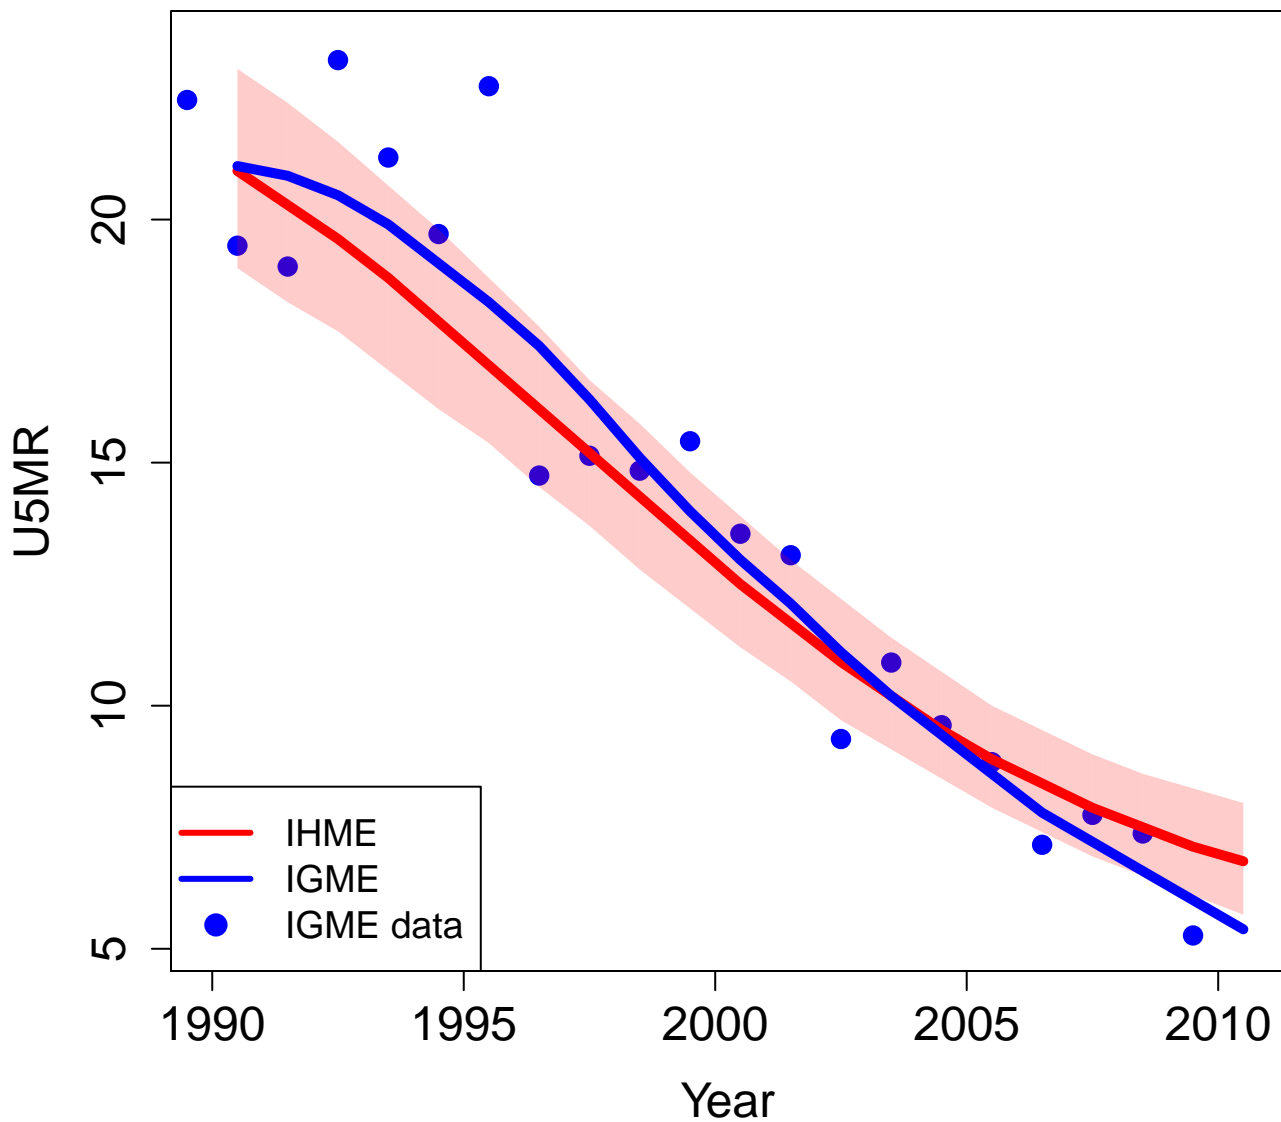

# Ethiopia

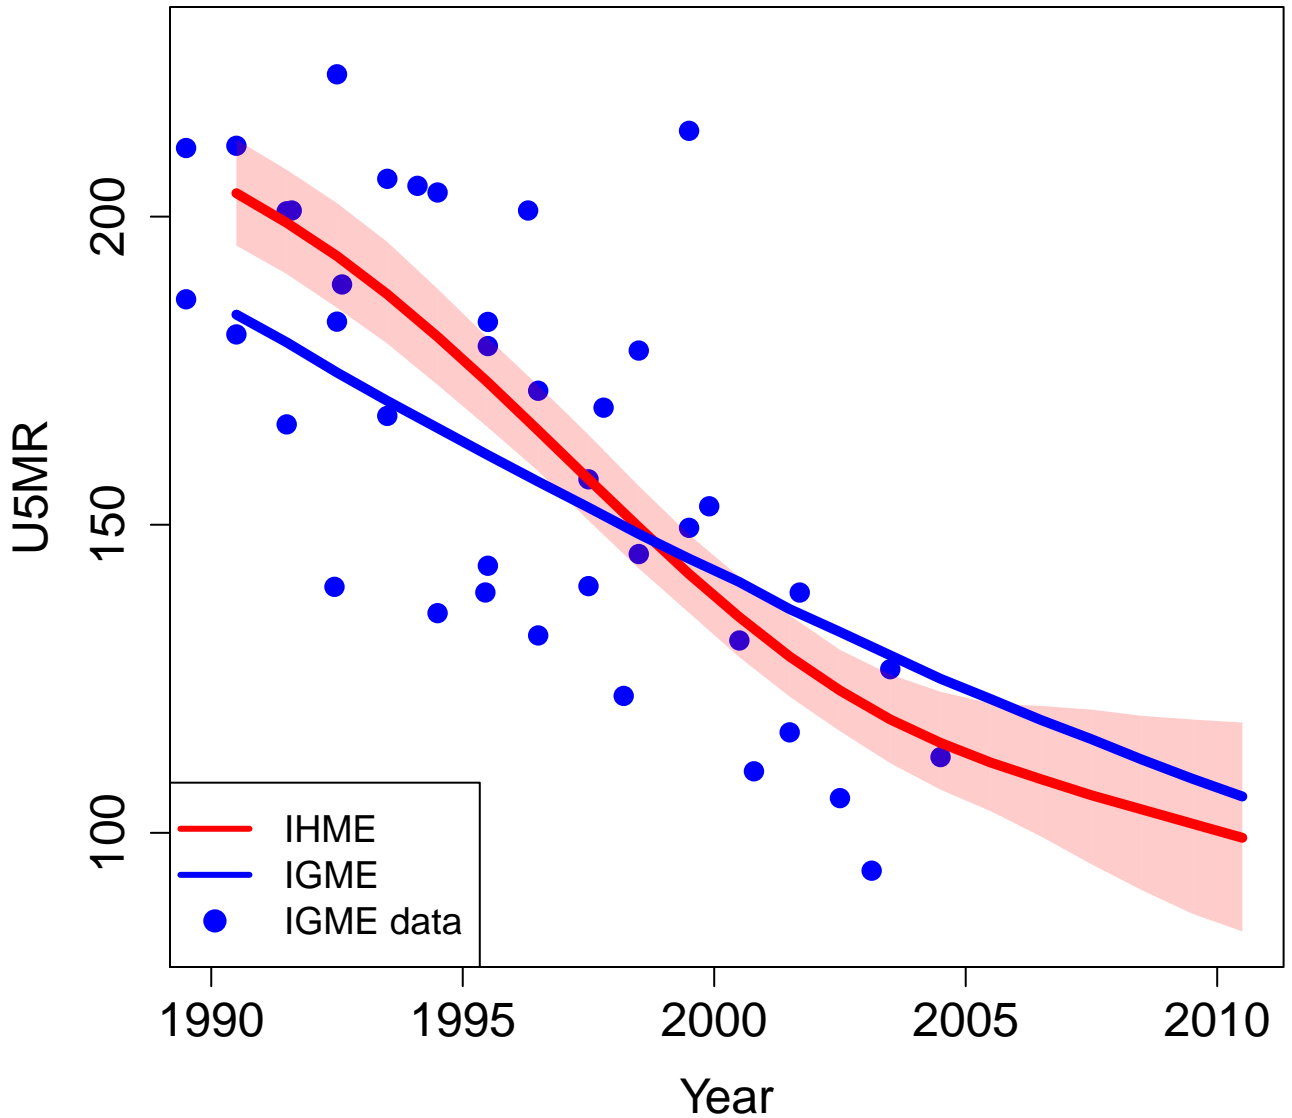

# Fiji

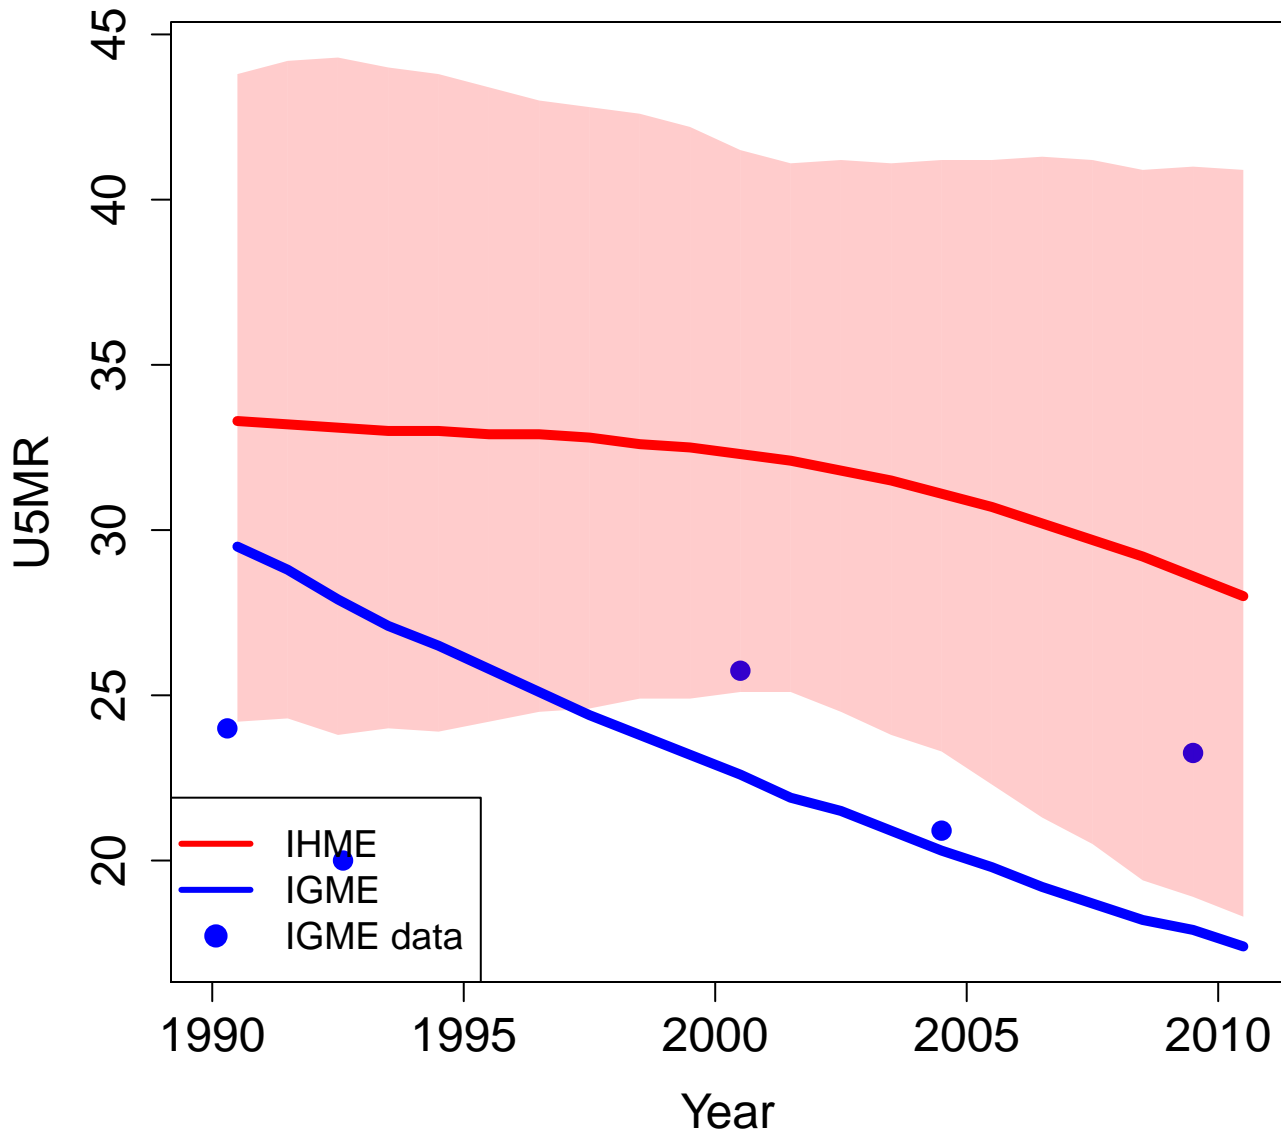

# Finland

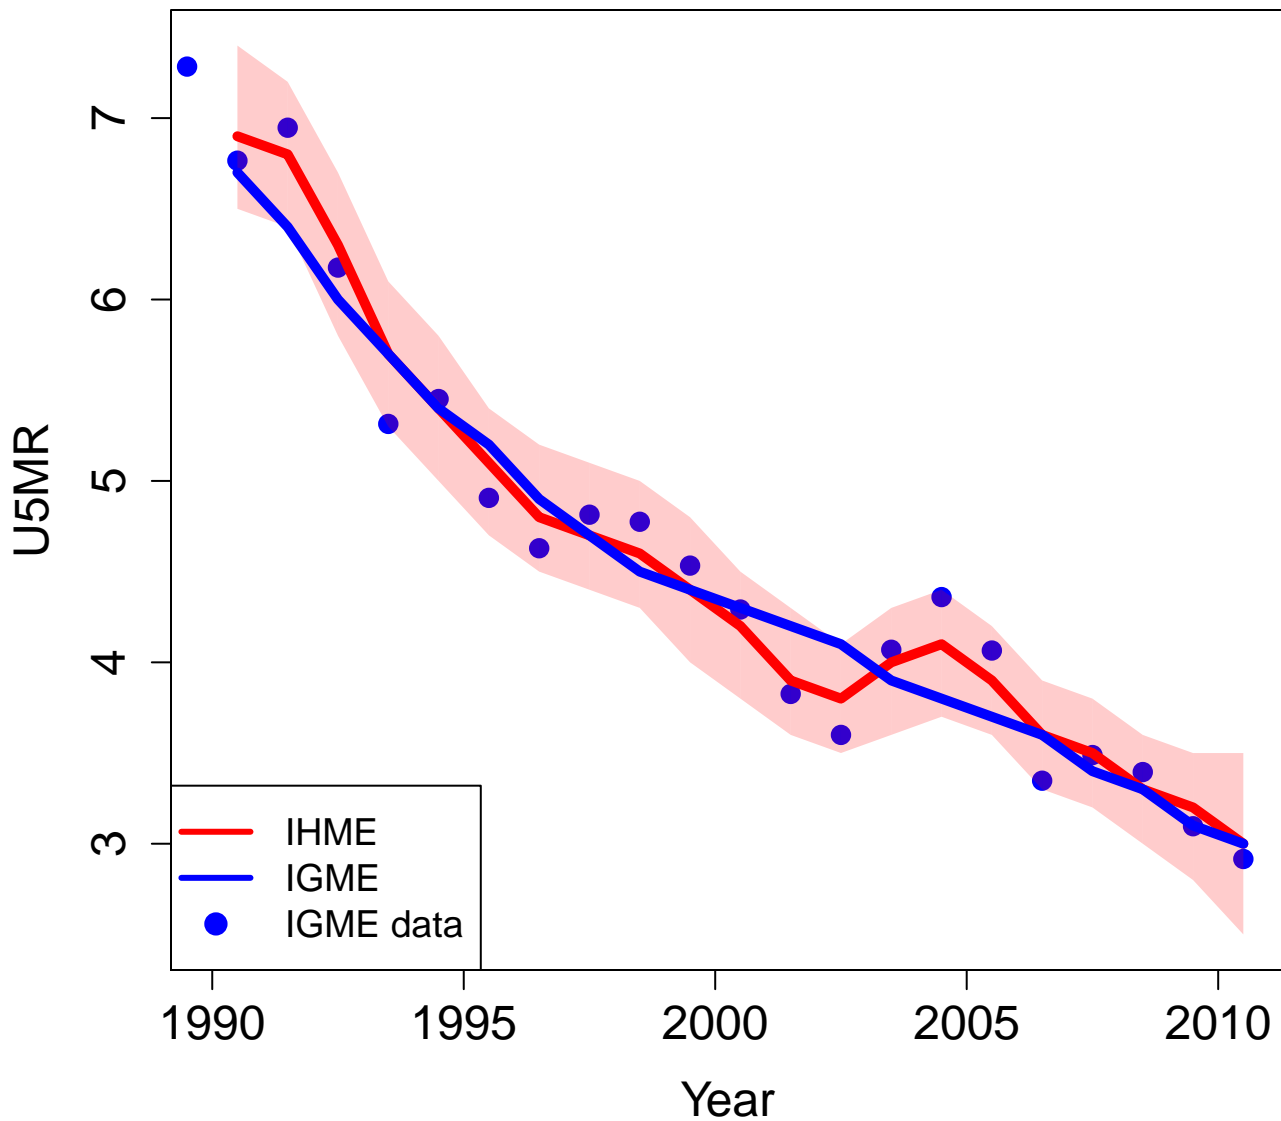

# France

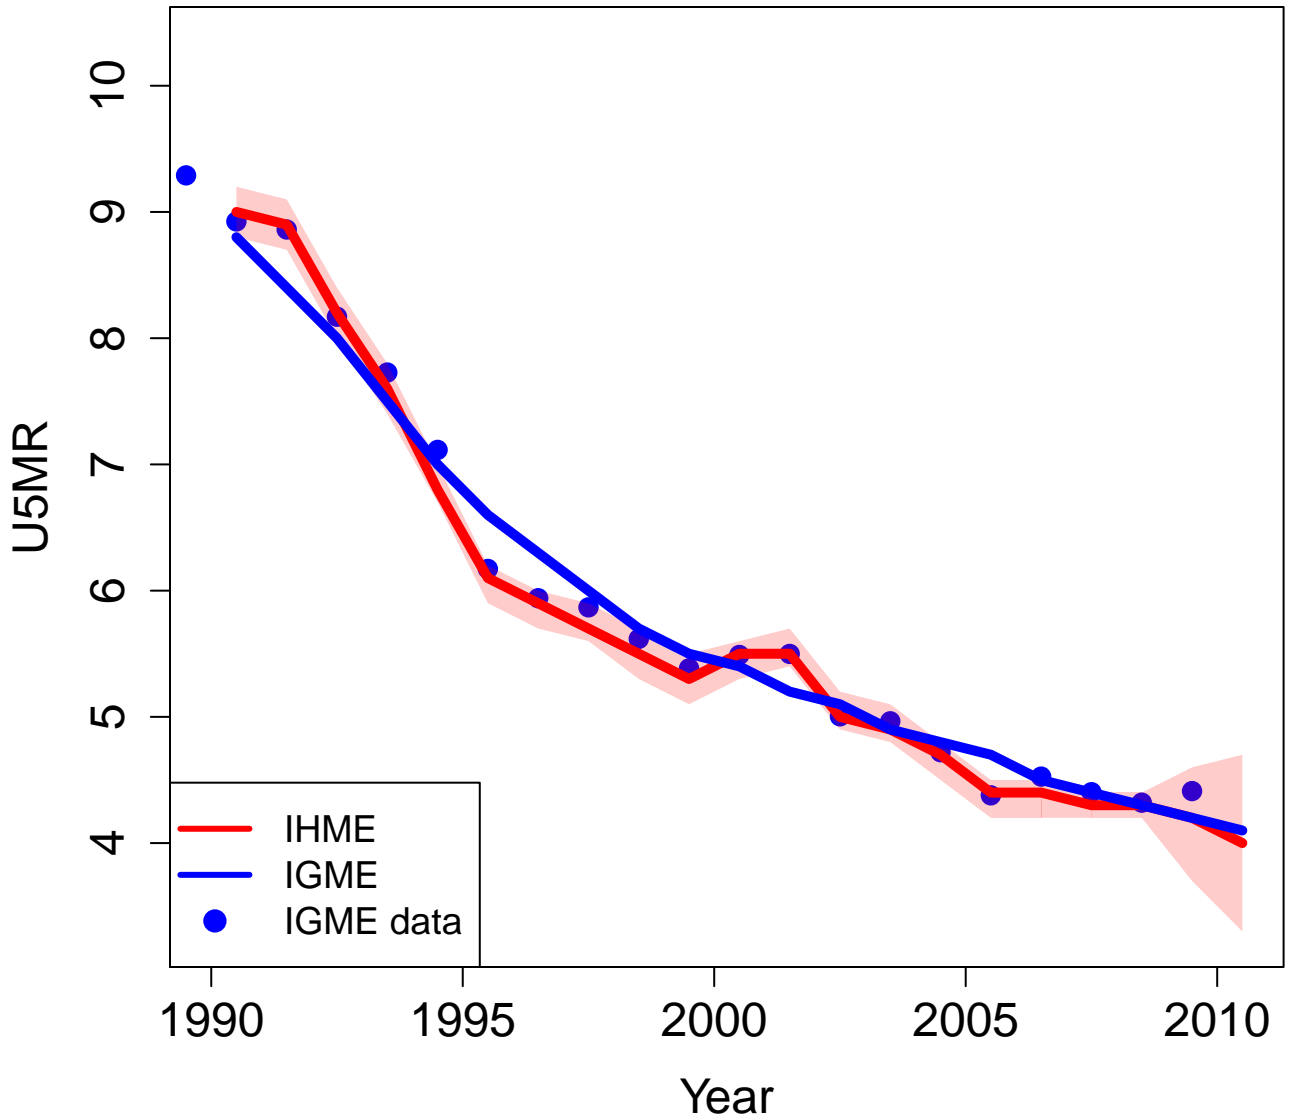

# Gabon

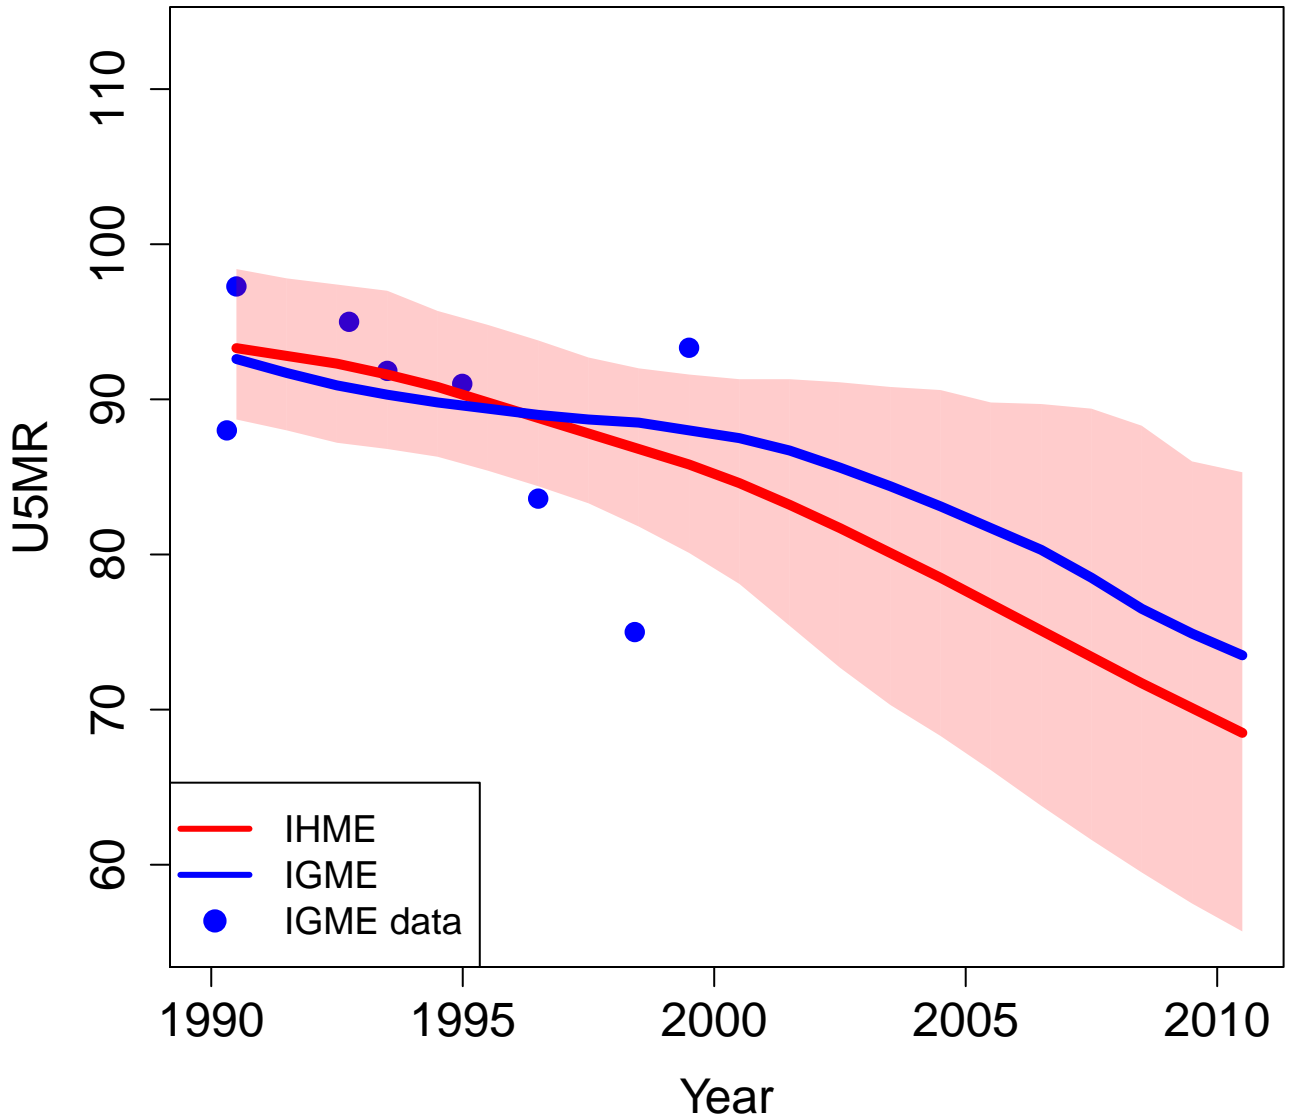

# Gambia

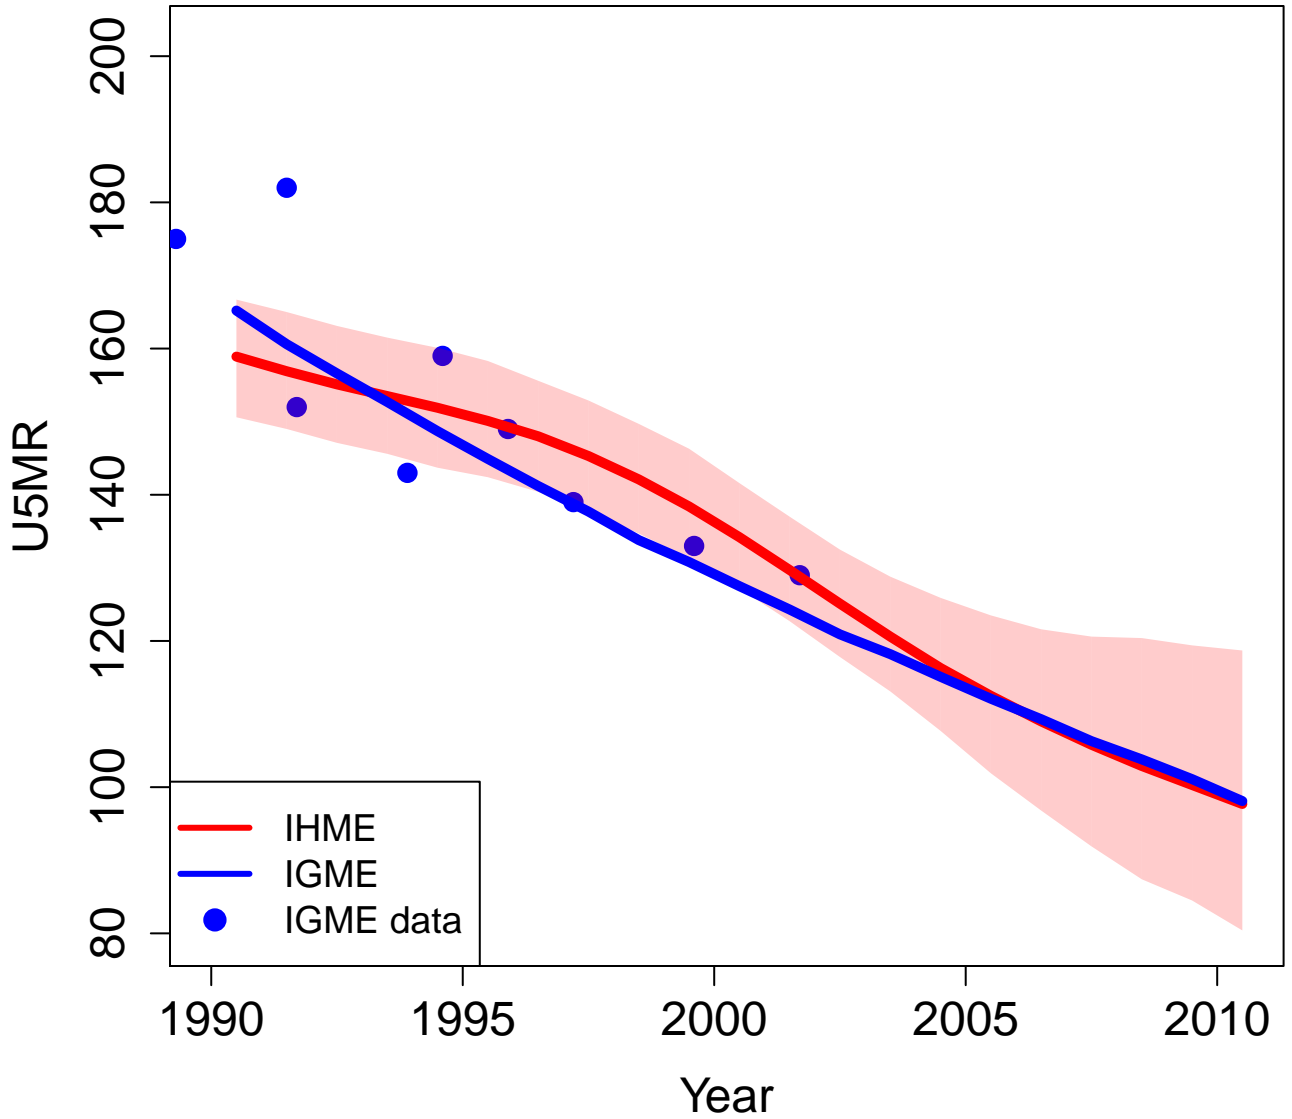

# Georgia

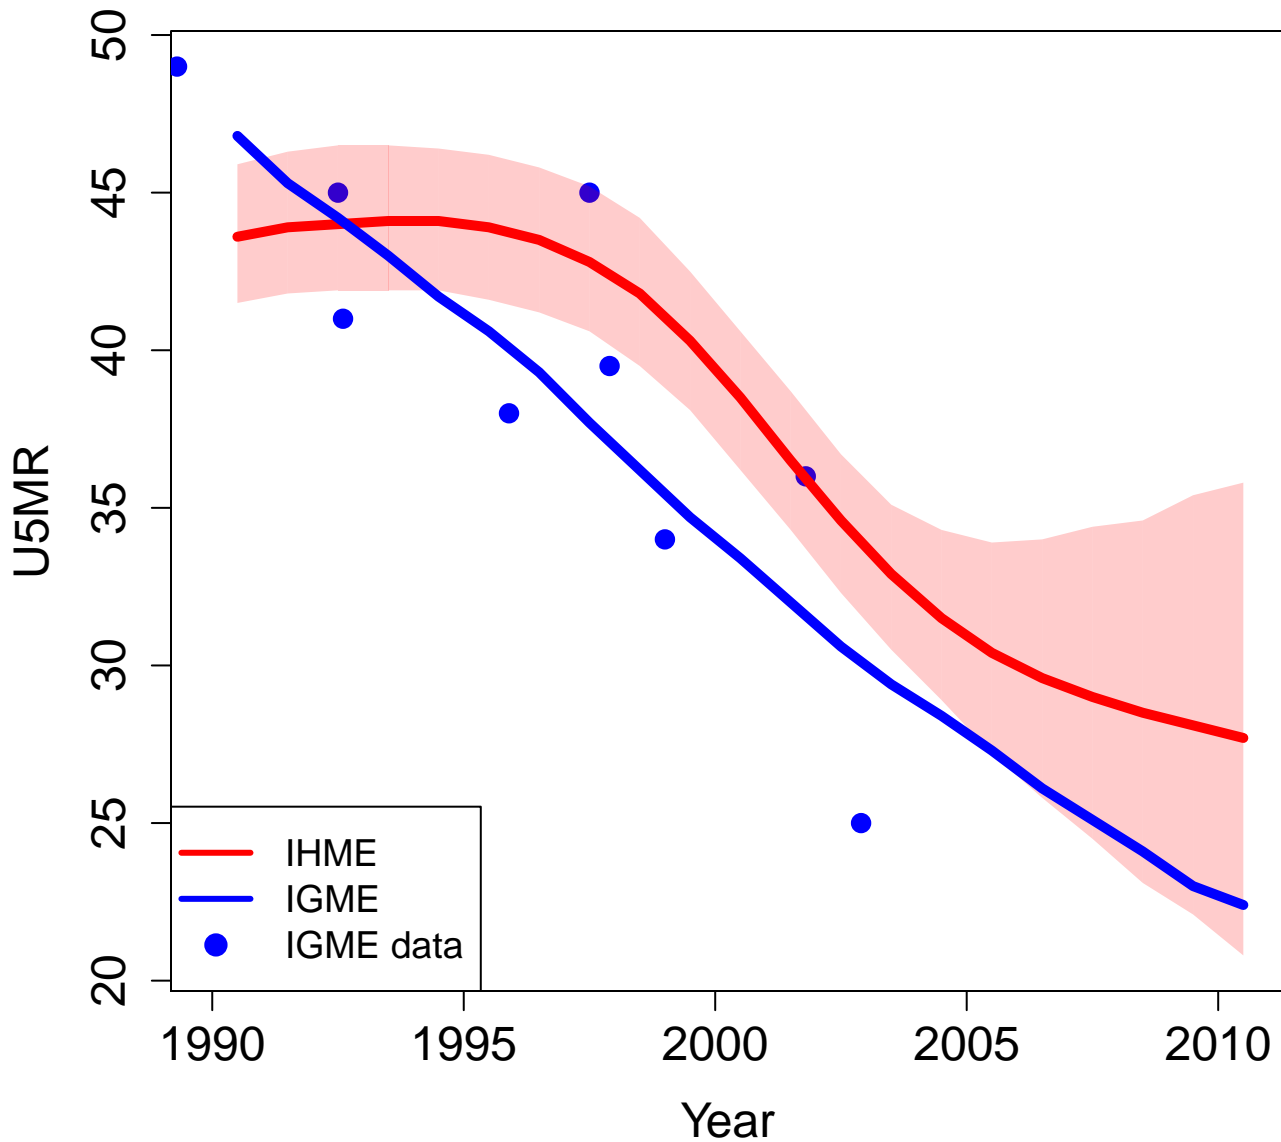



# Germany

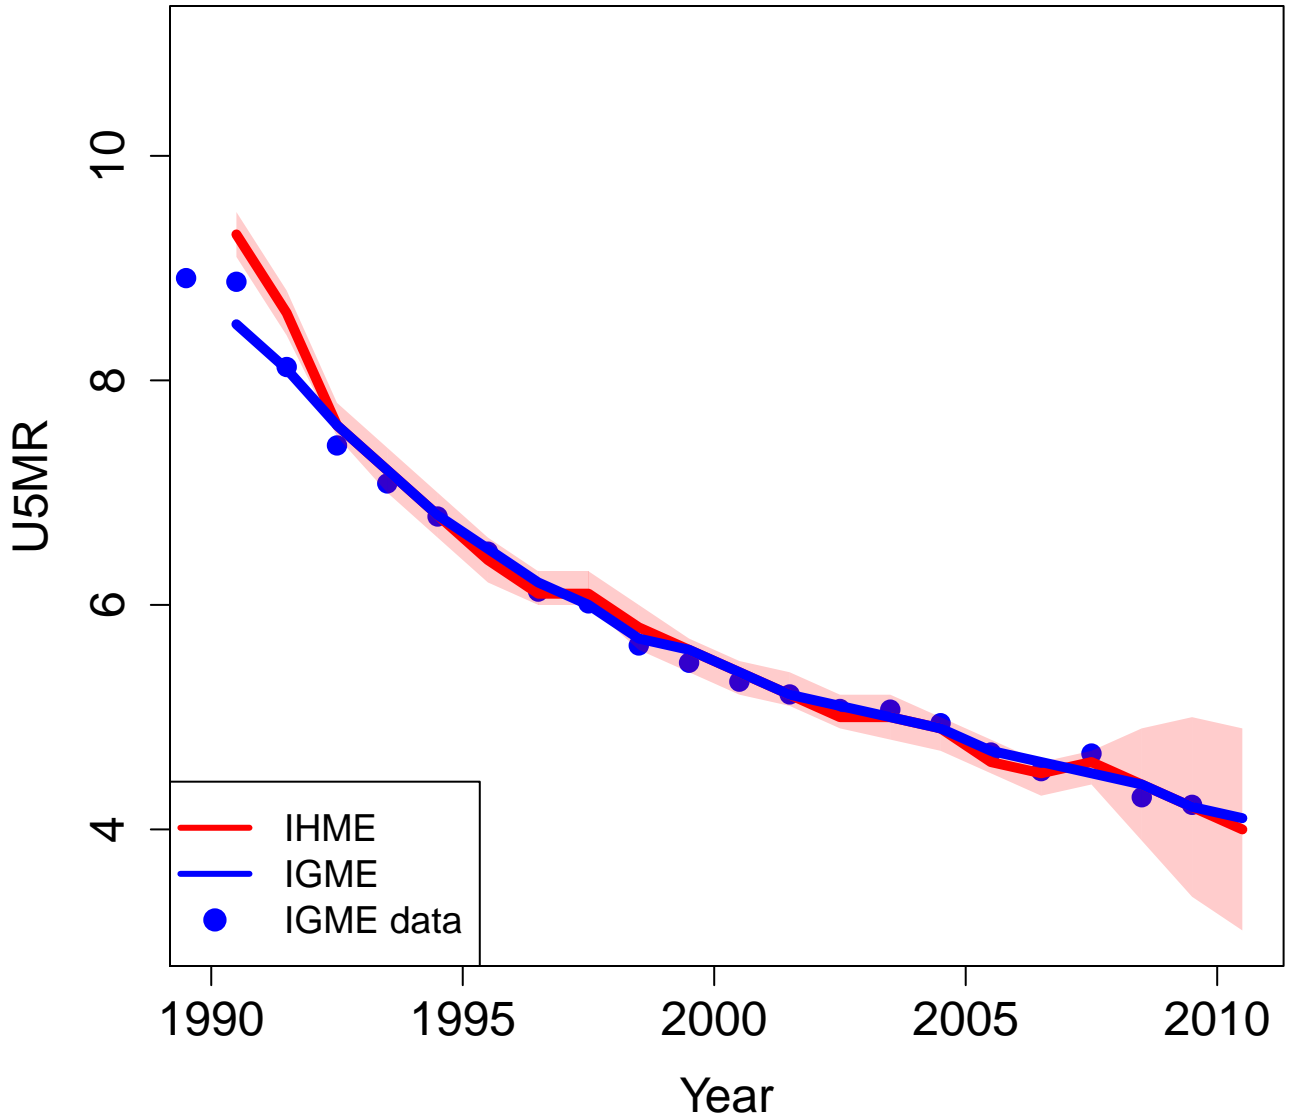

# Ghana

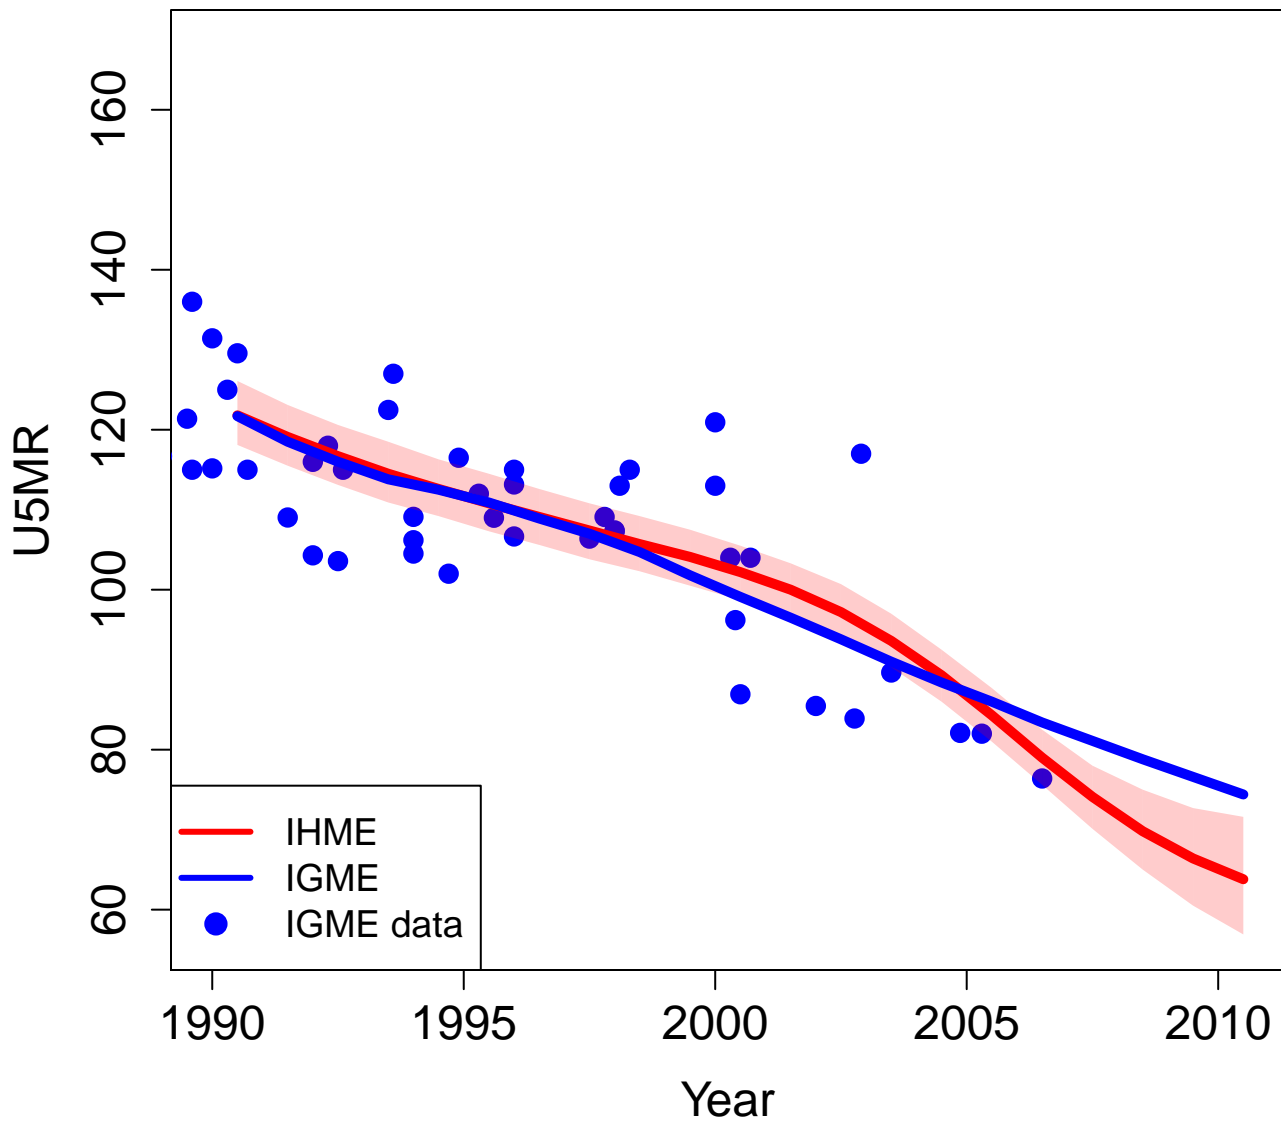

# Greece

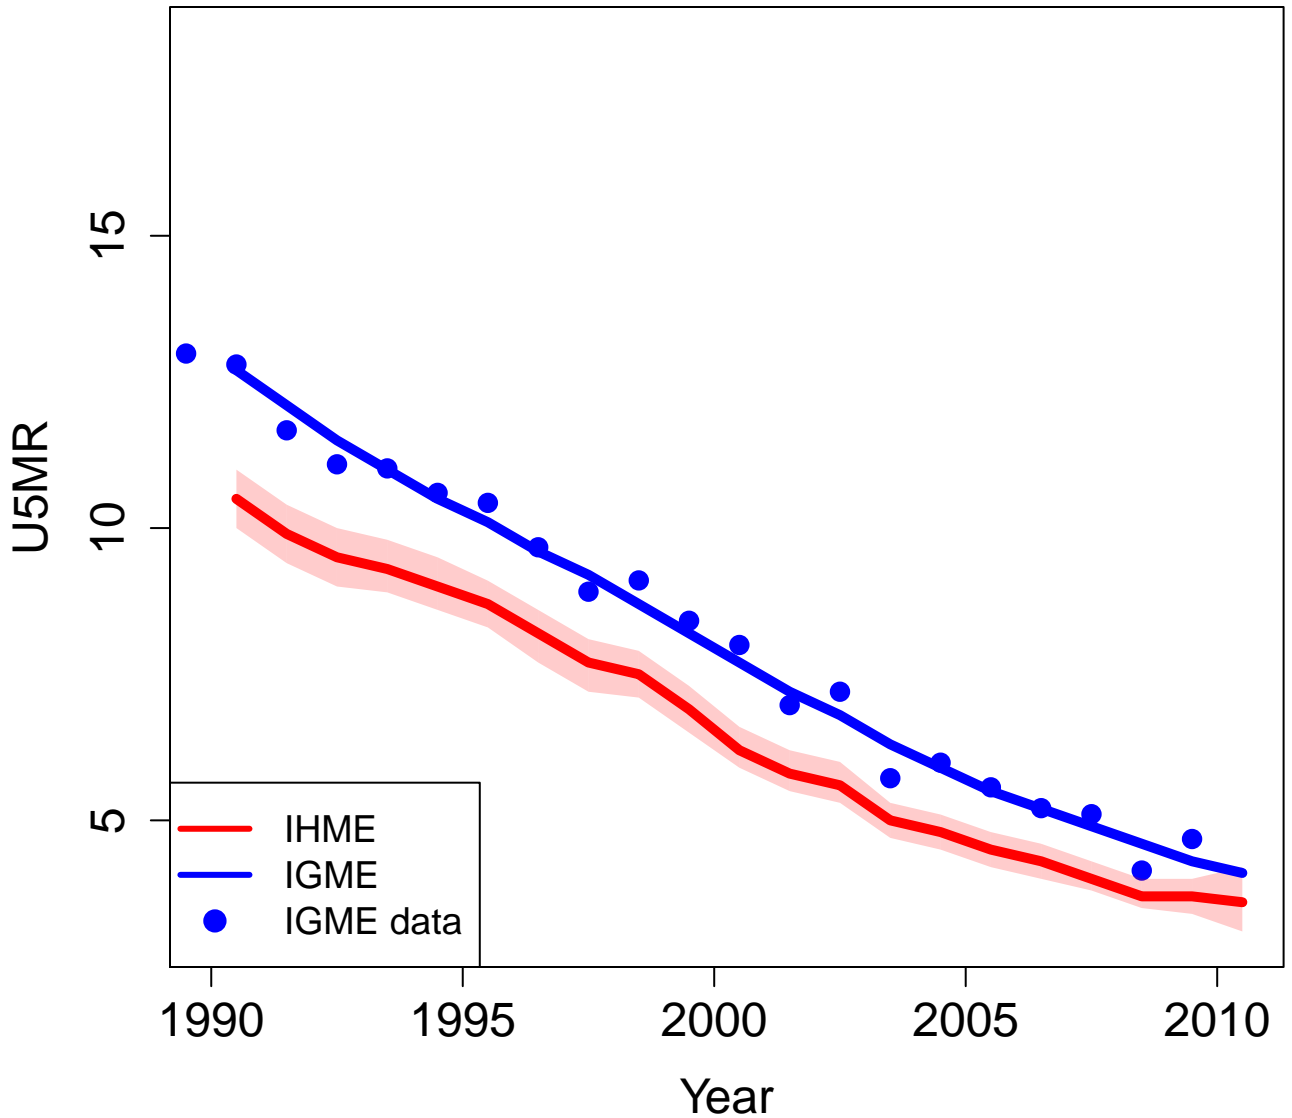

# Grenada

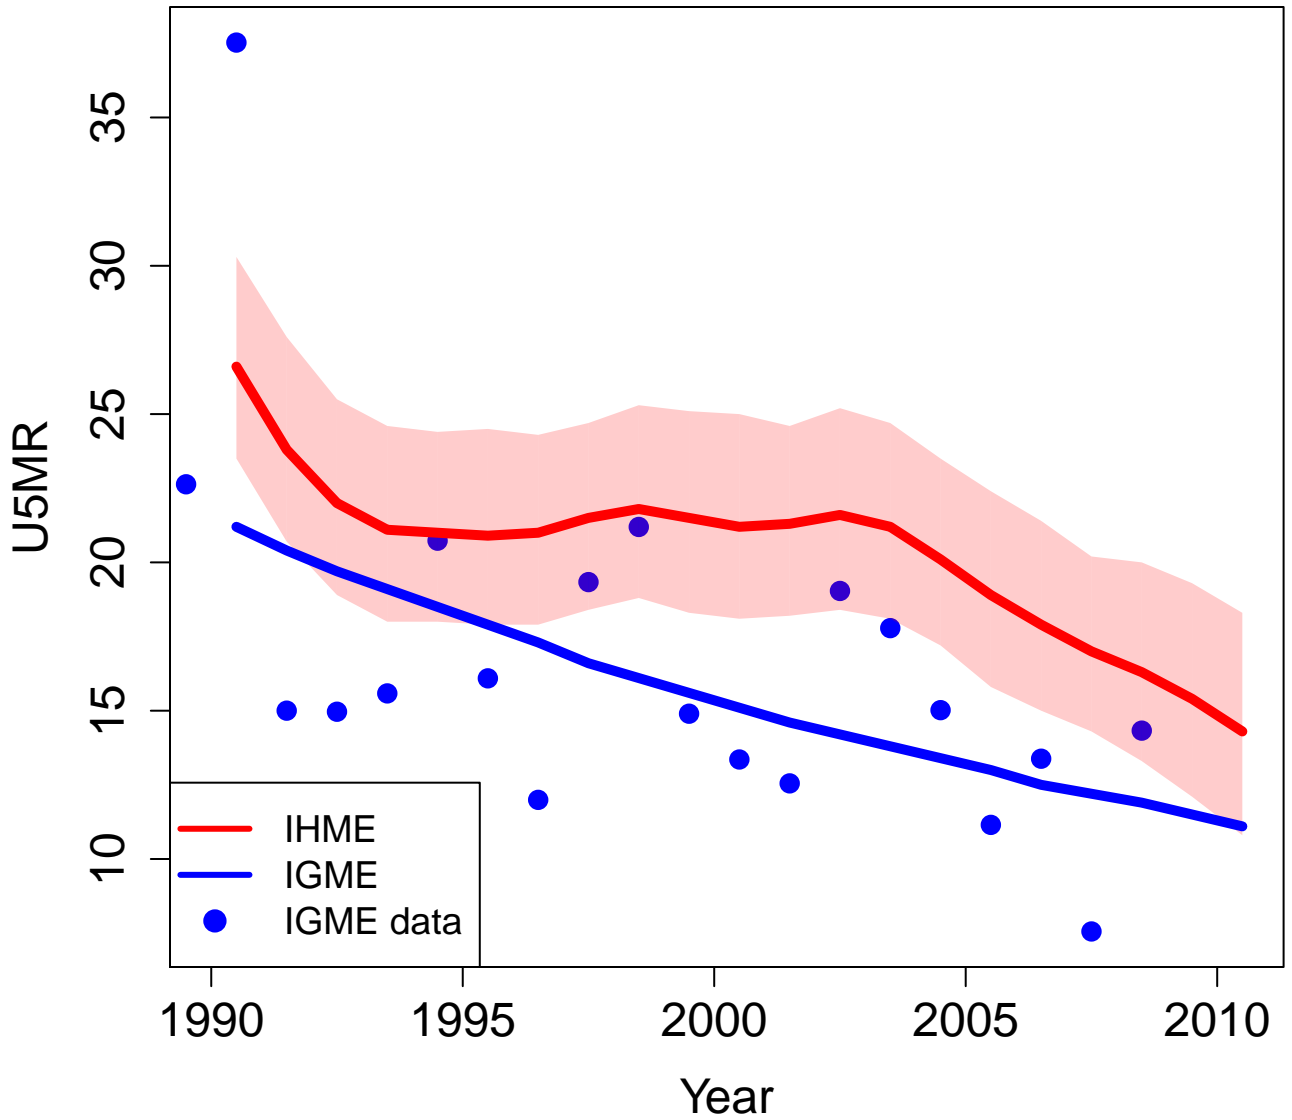

# Guatemala

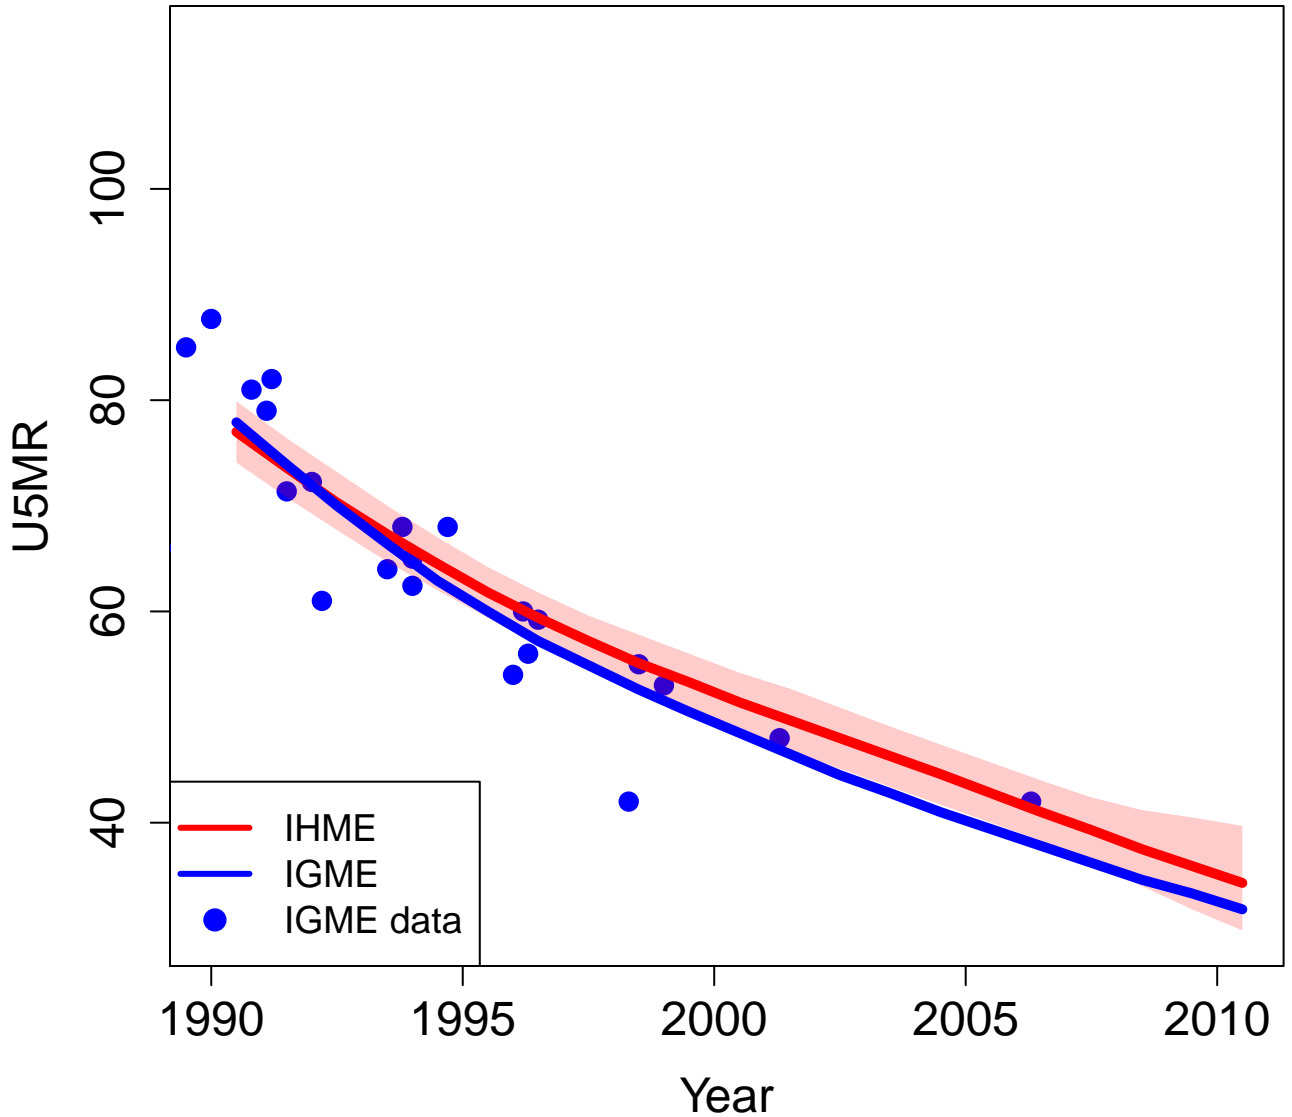

# Guinea

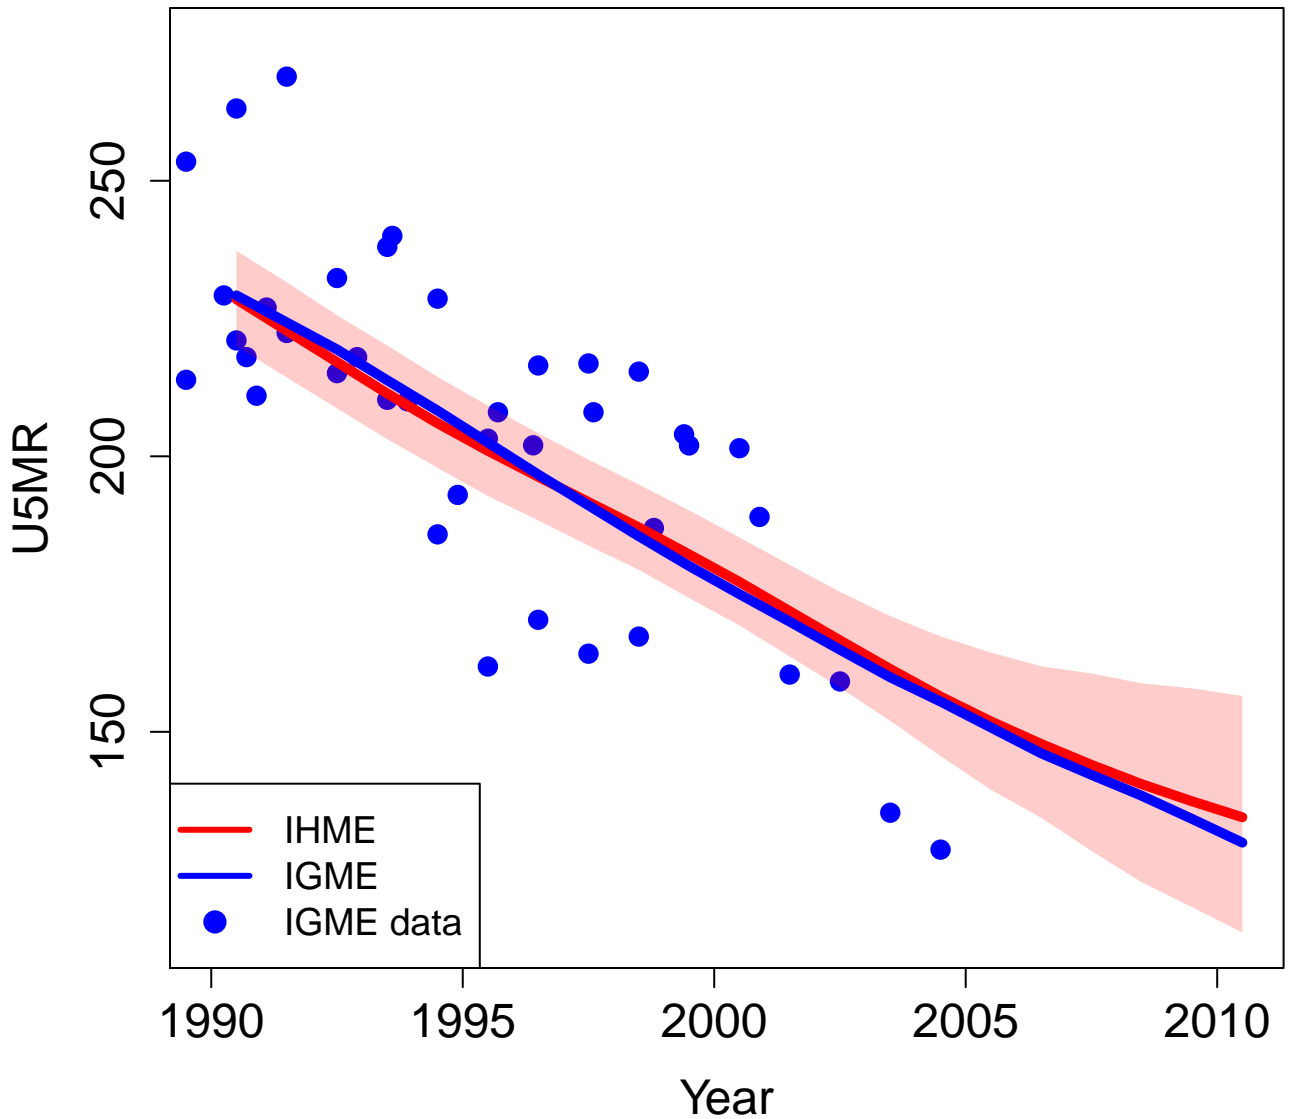

# Guinea-Bissau

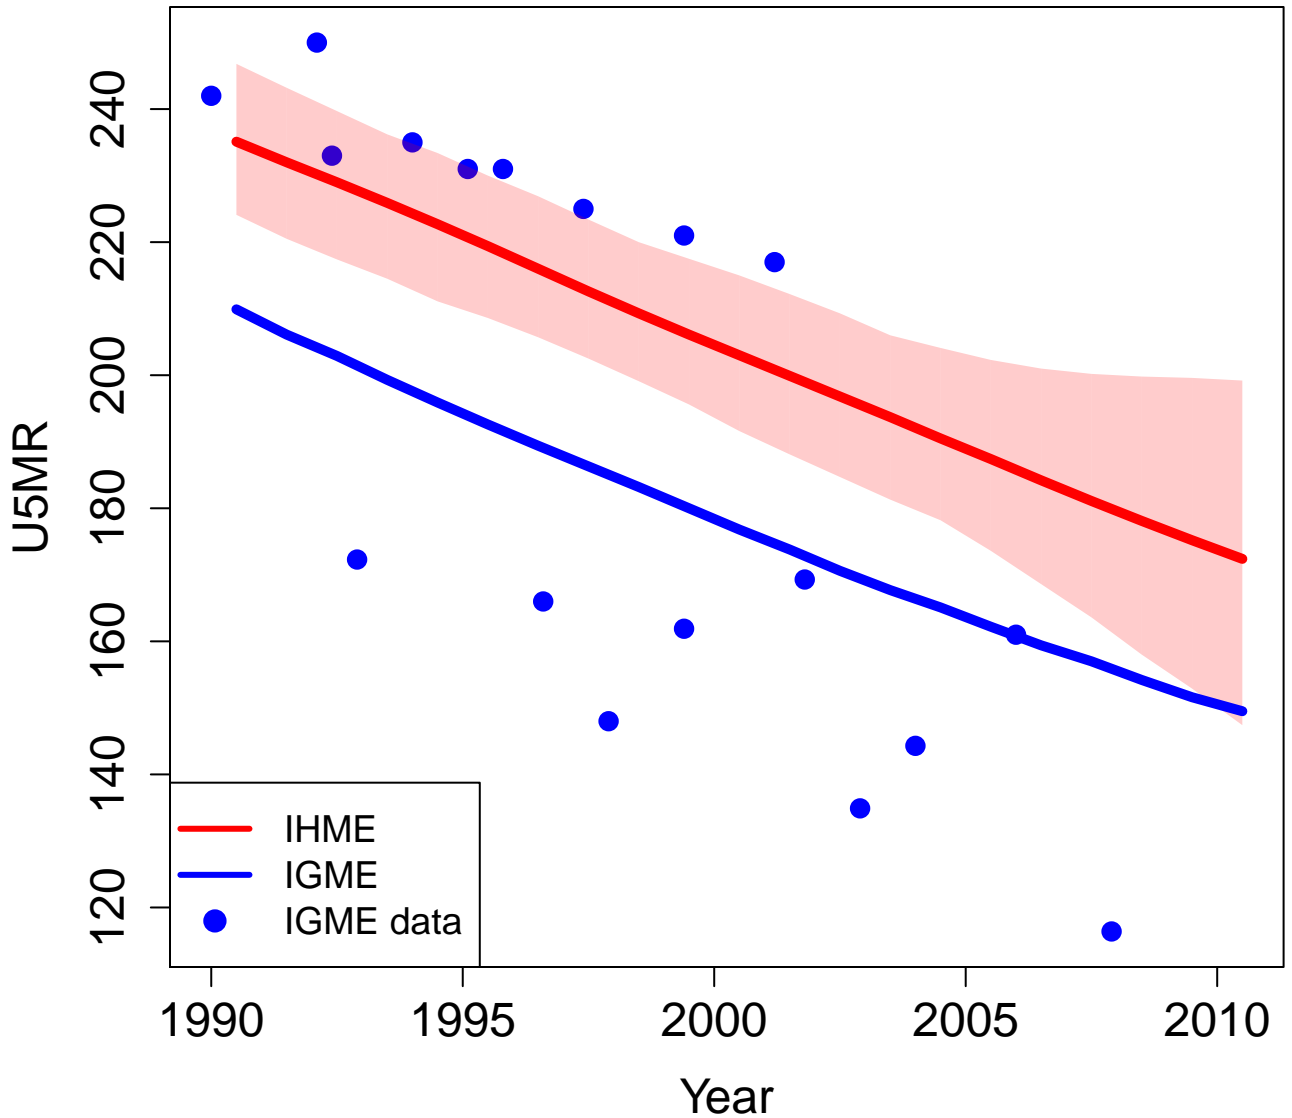

# Guyana

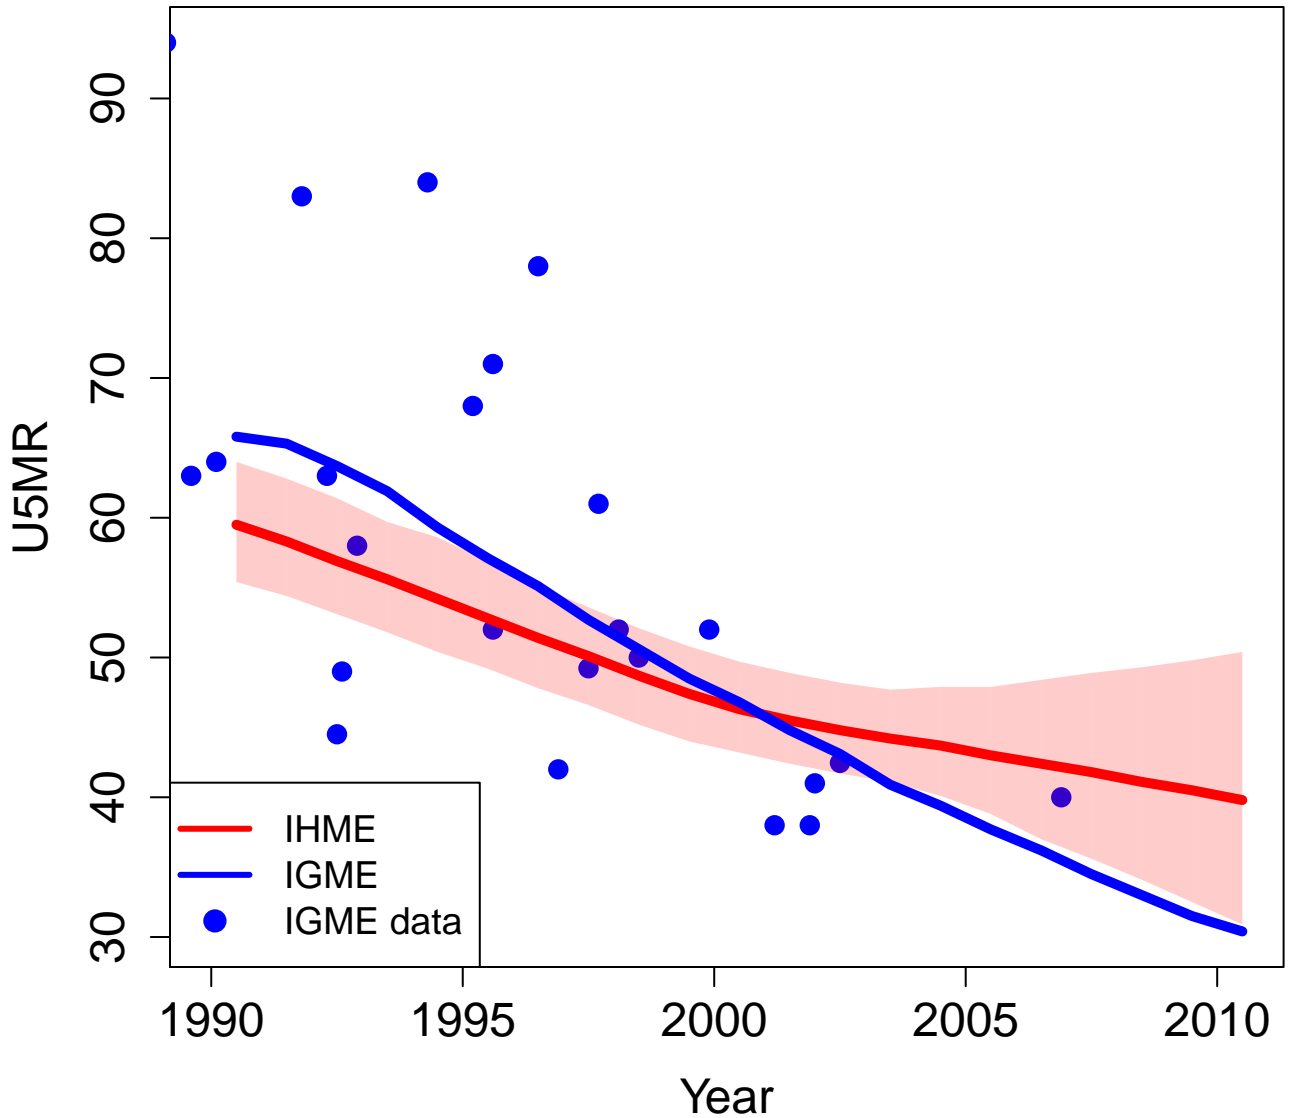



# Haiti

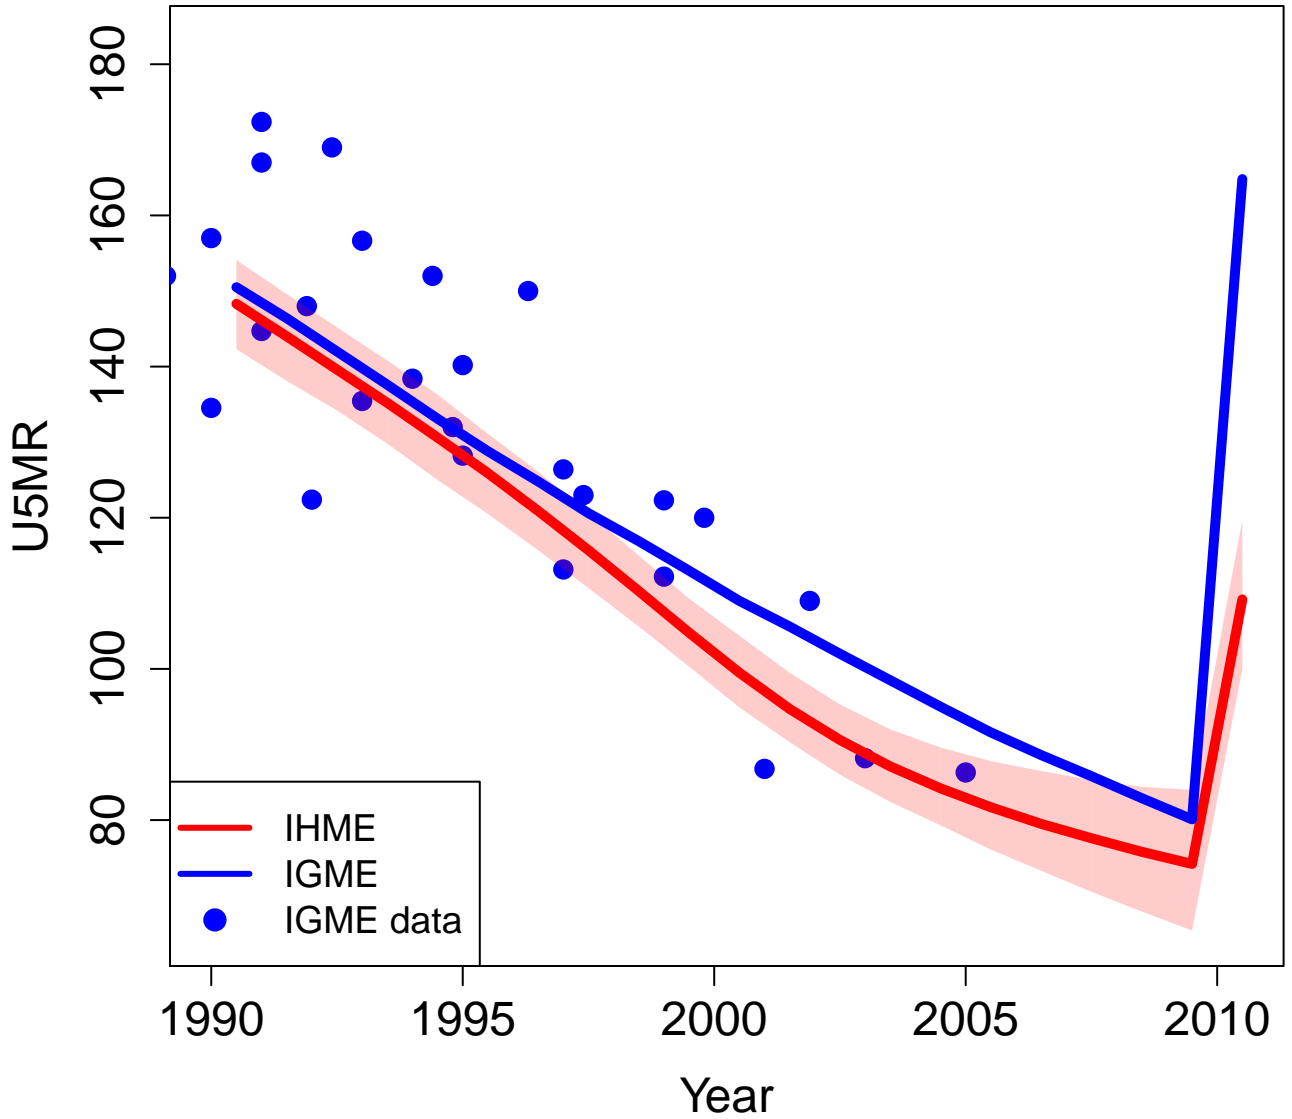

# Honduras

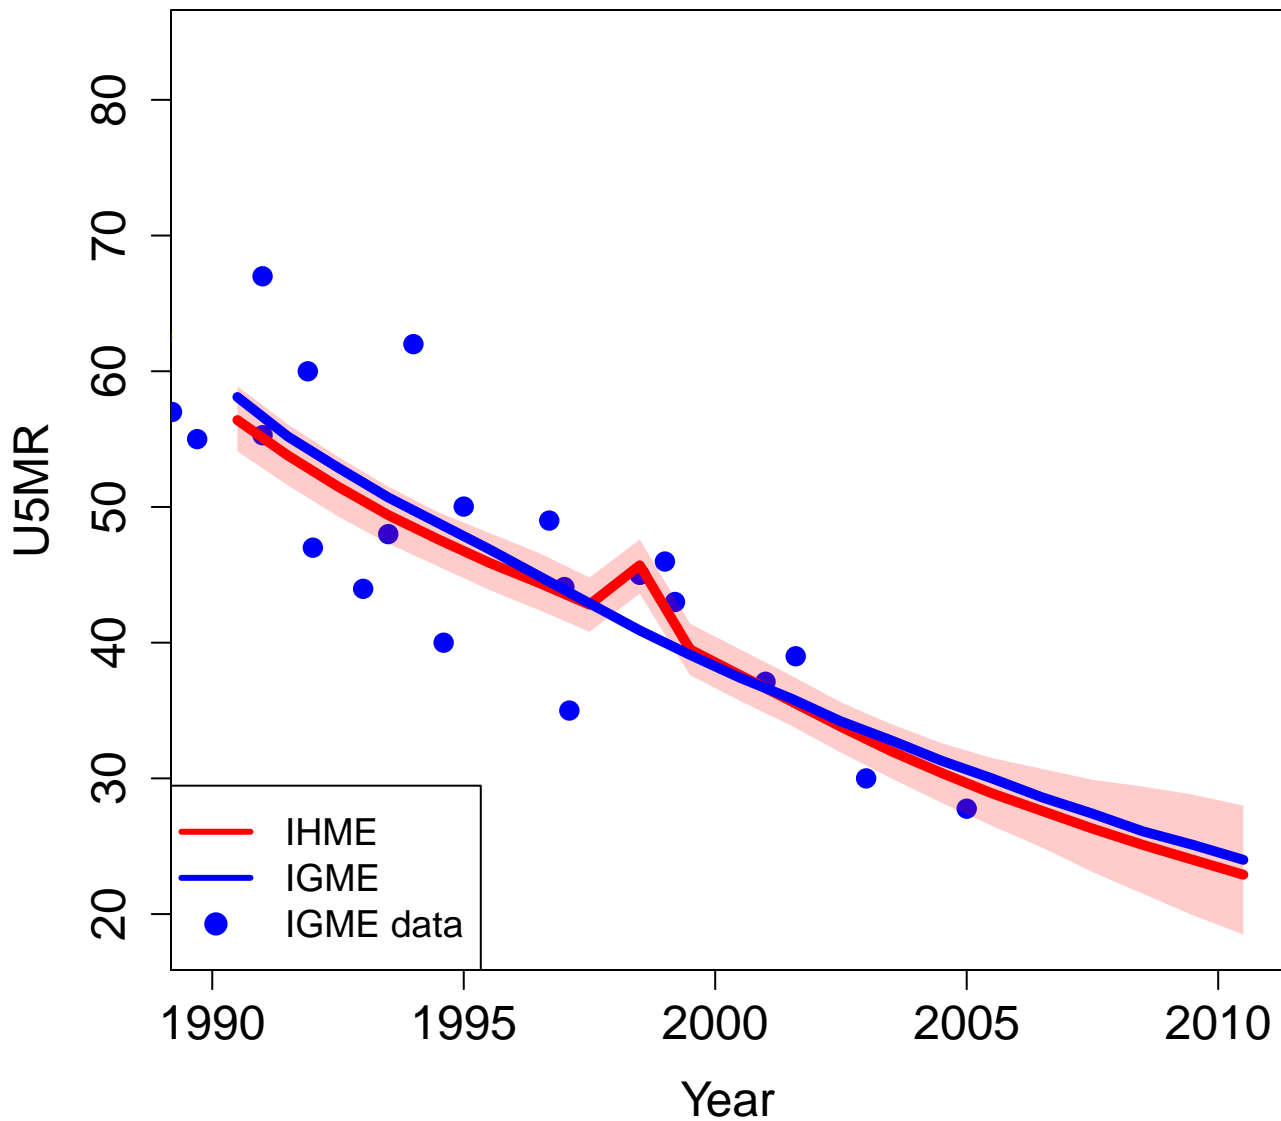

# Hungary

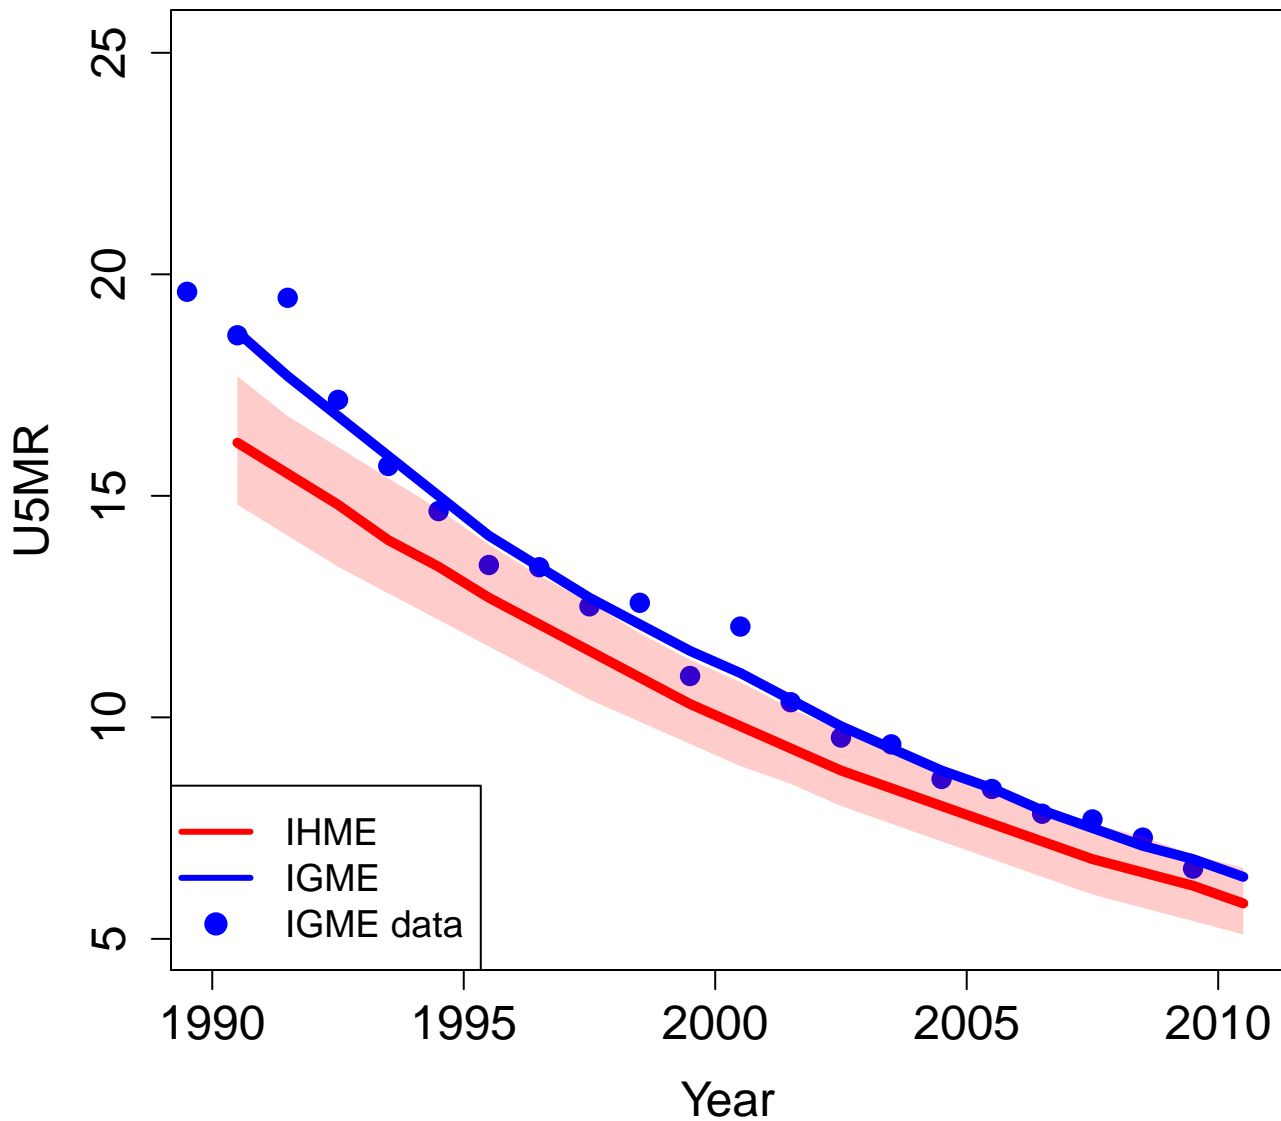

# Iceland

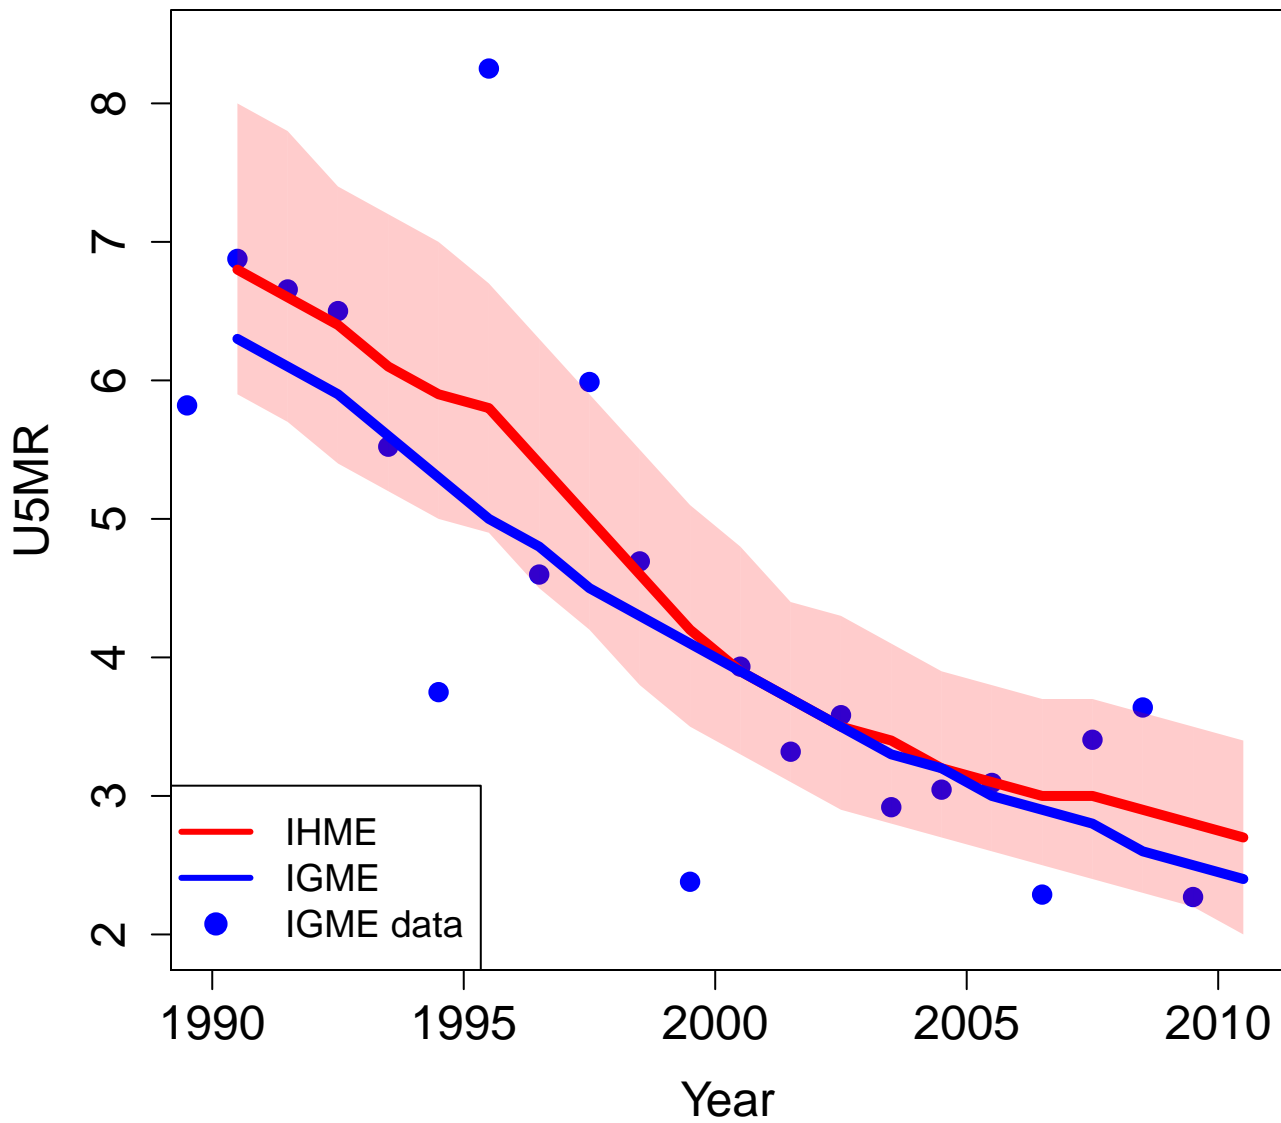

# India

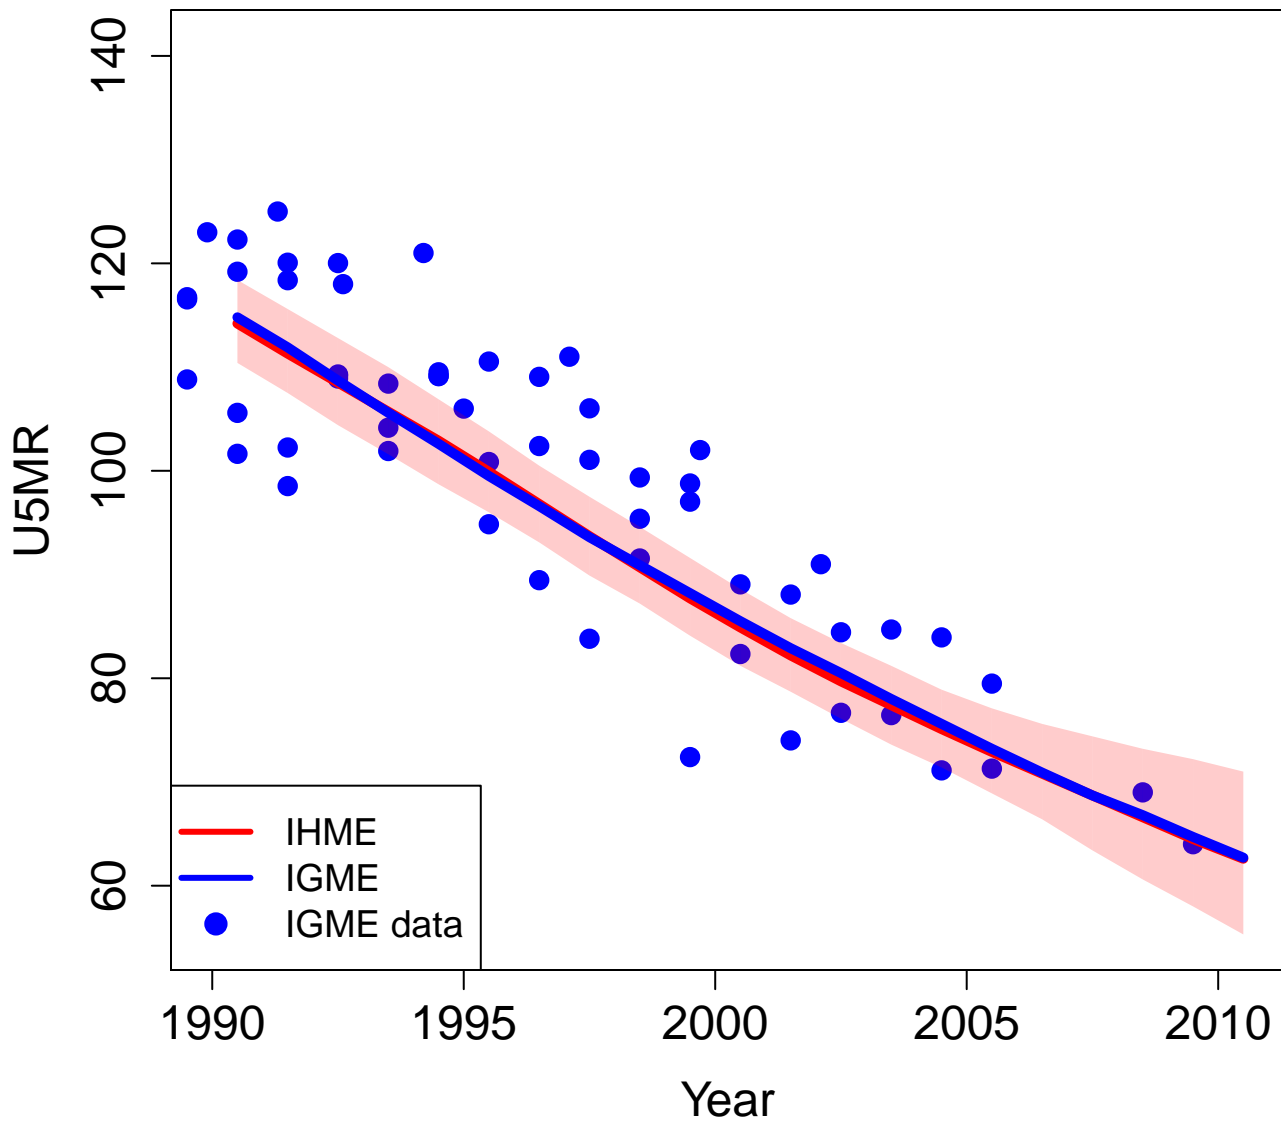

# Indonesia

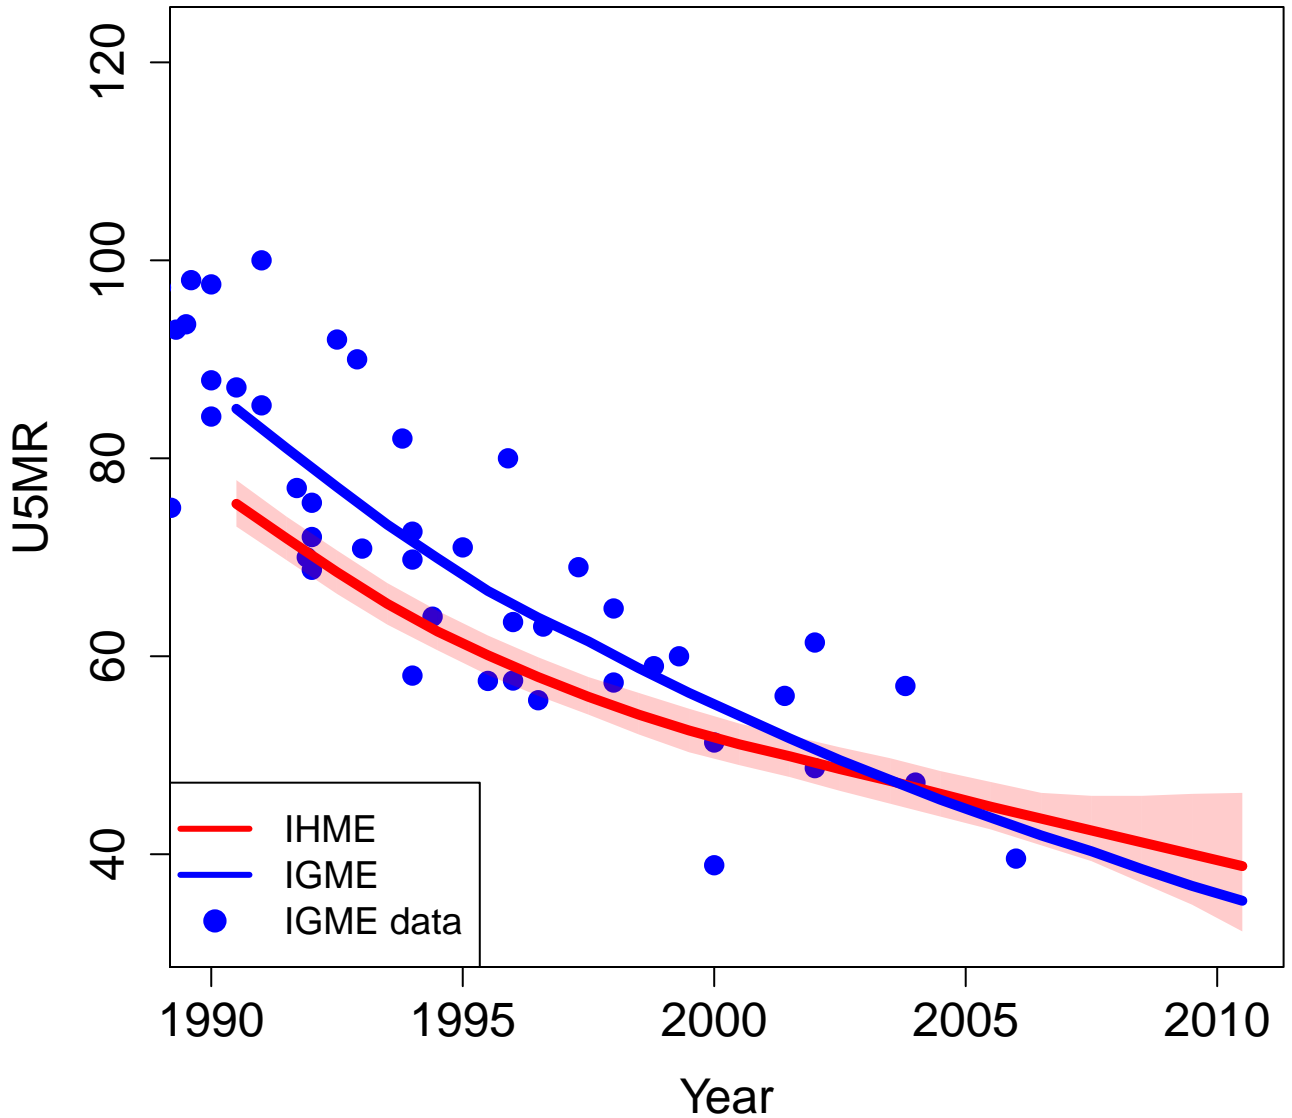

# Iran

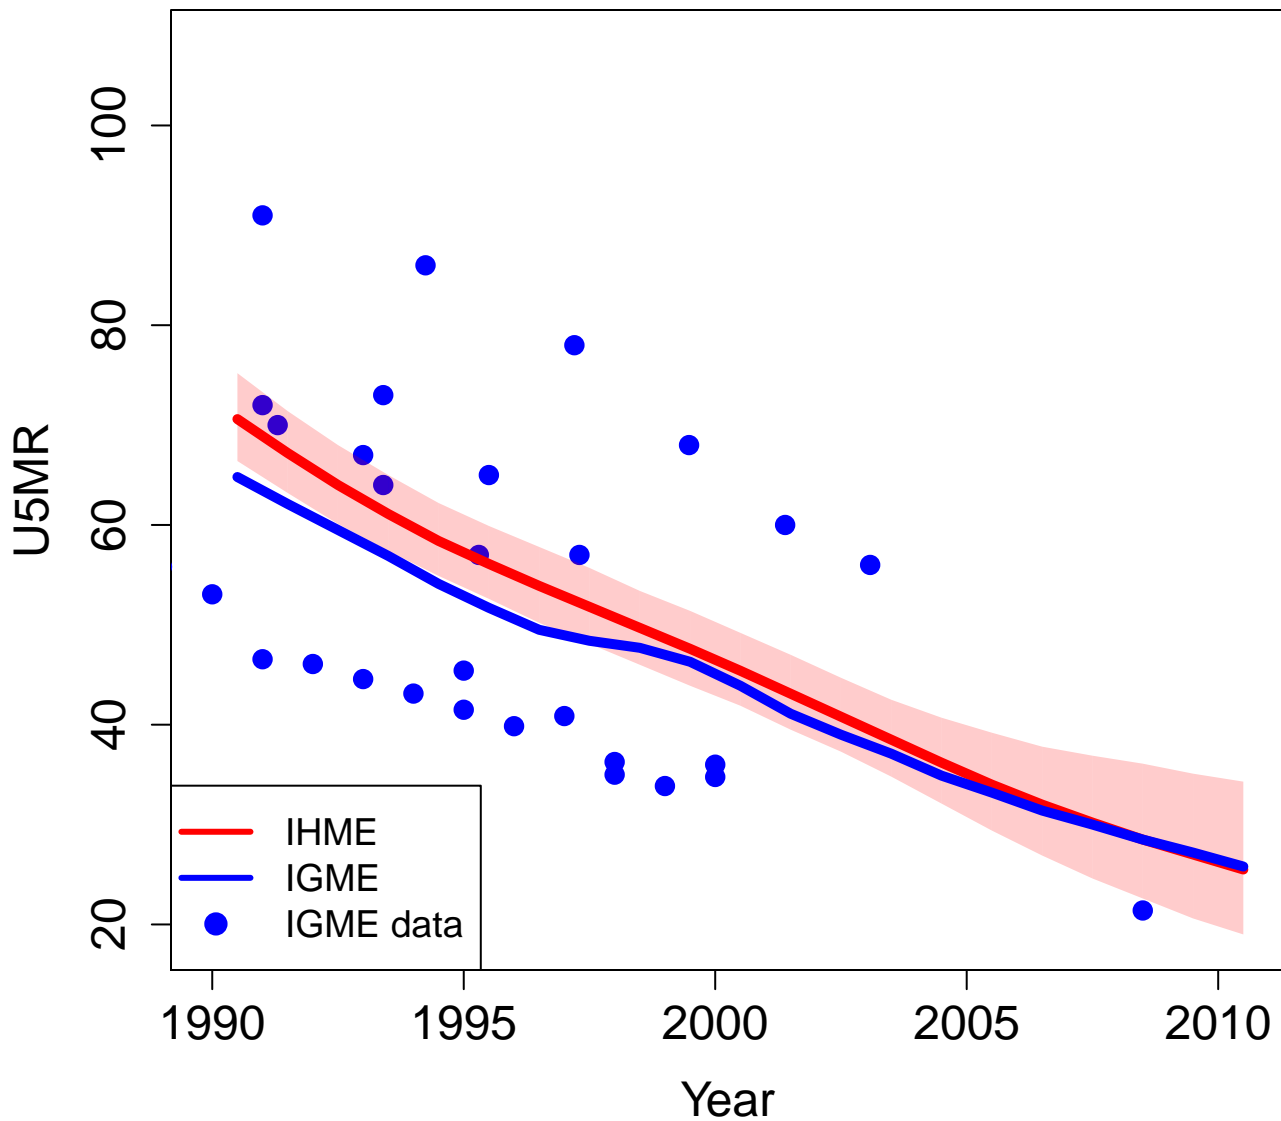

# Iraq

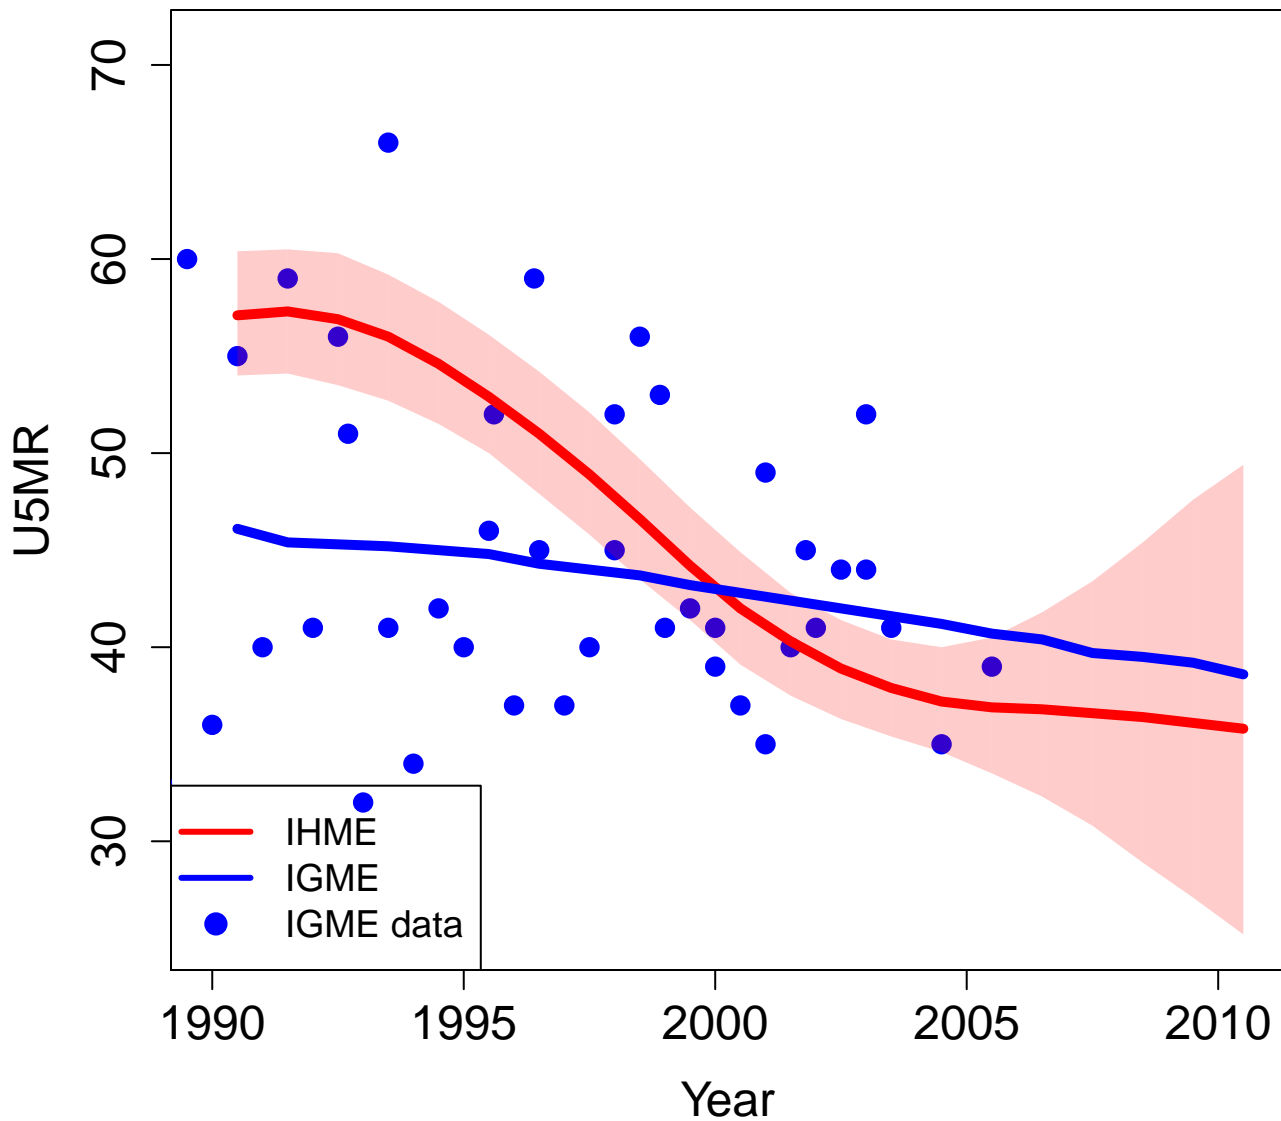



# Ireland

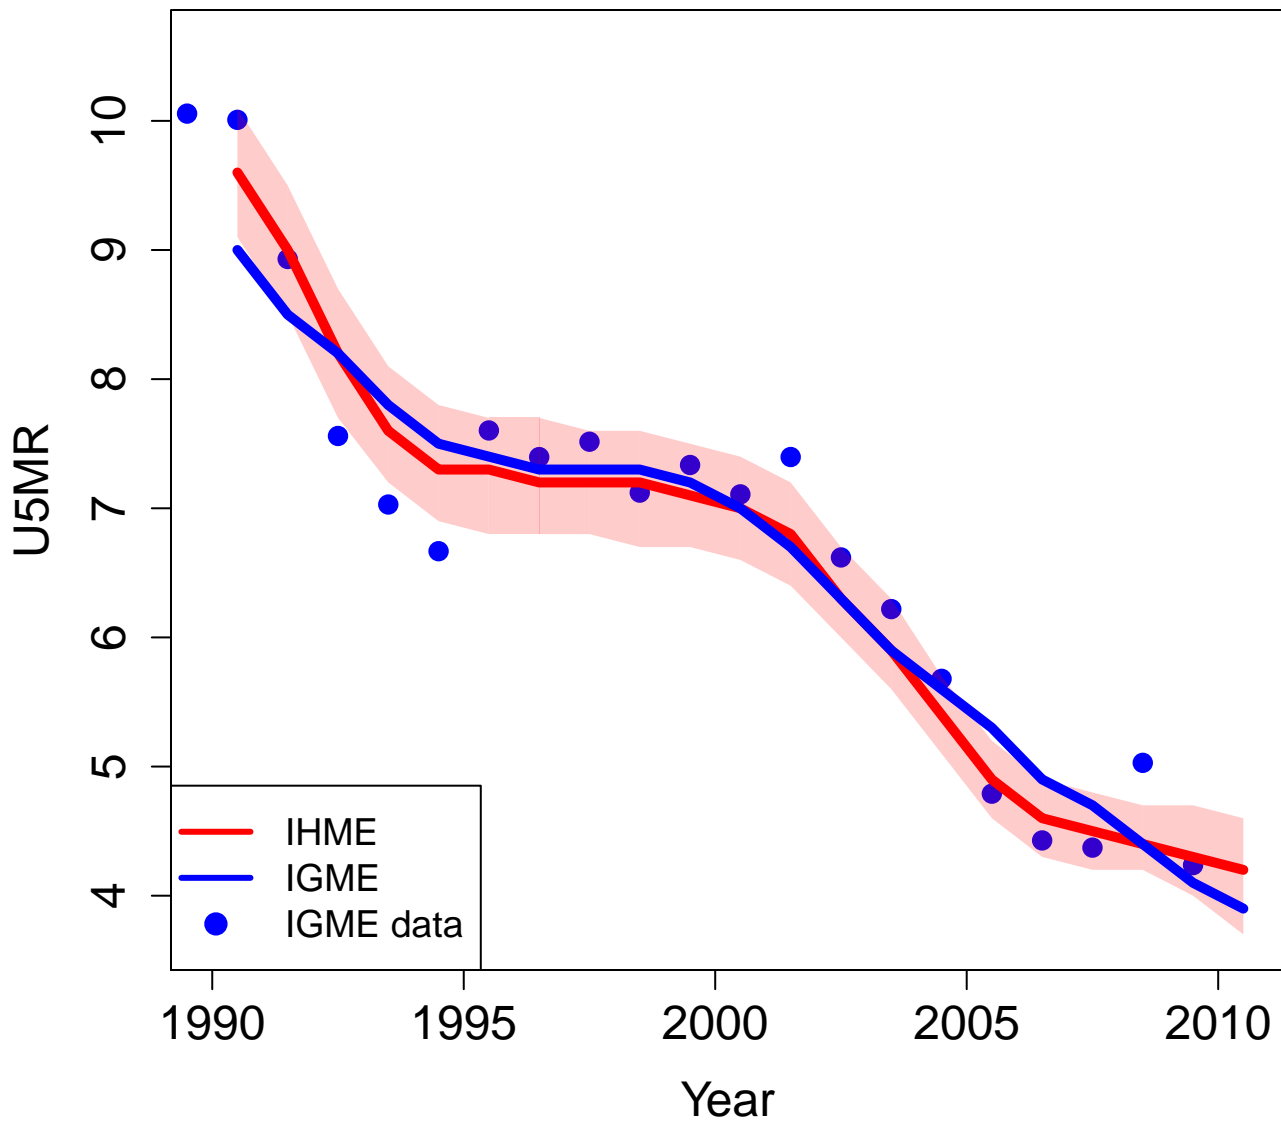

# Israel

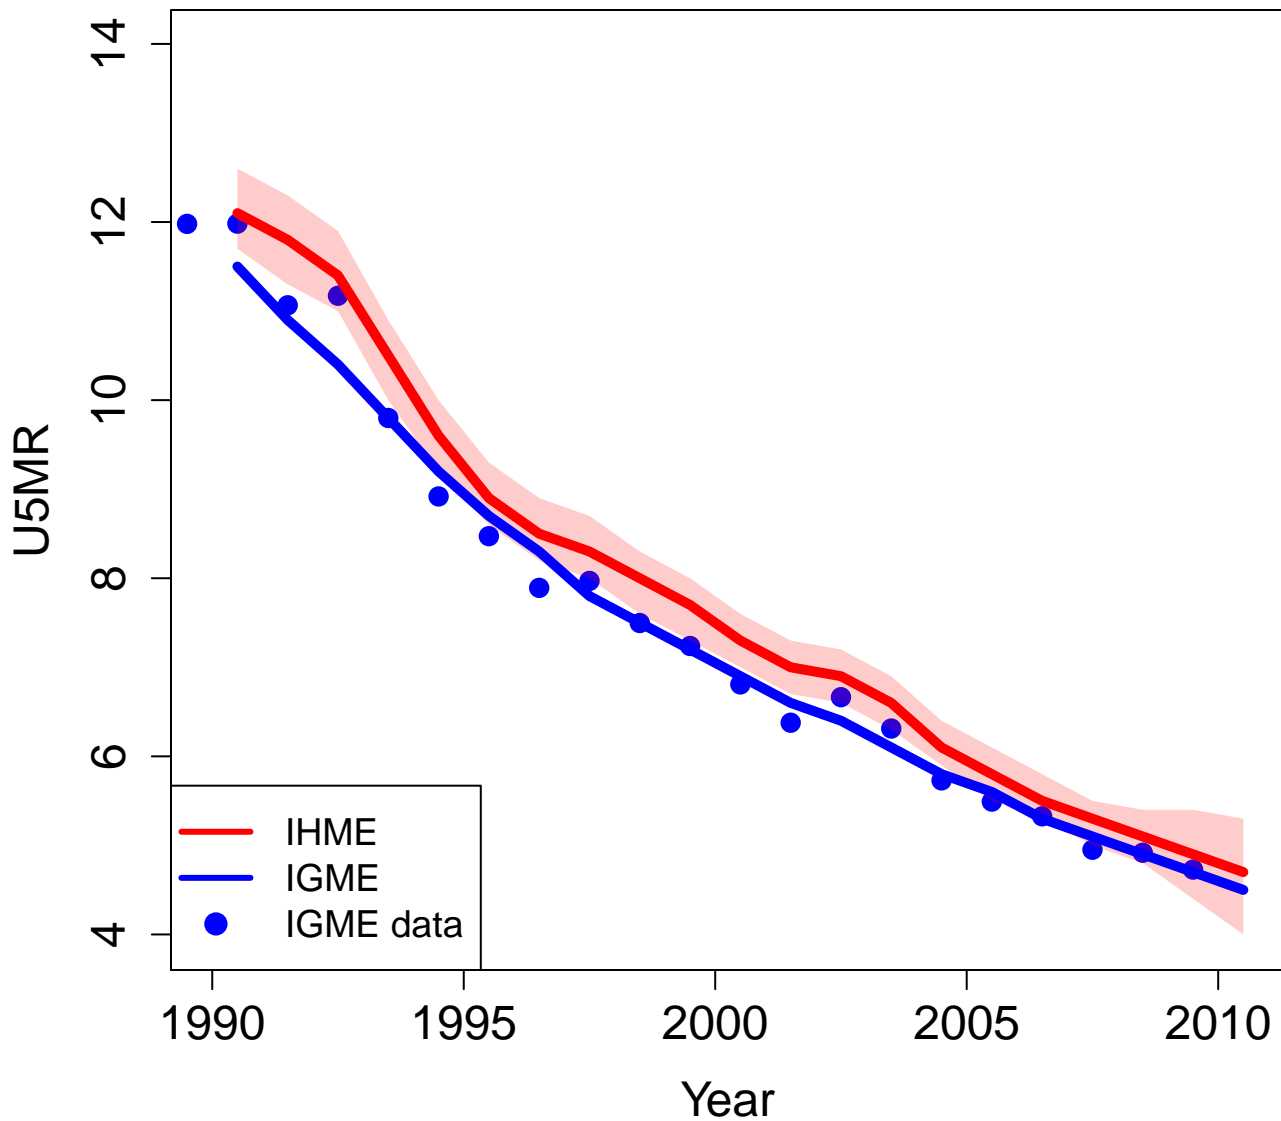

# Italy

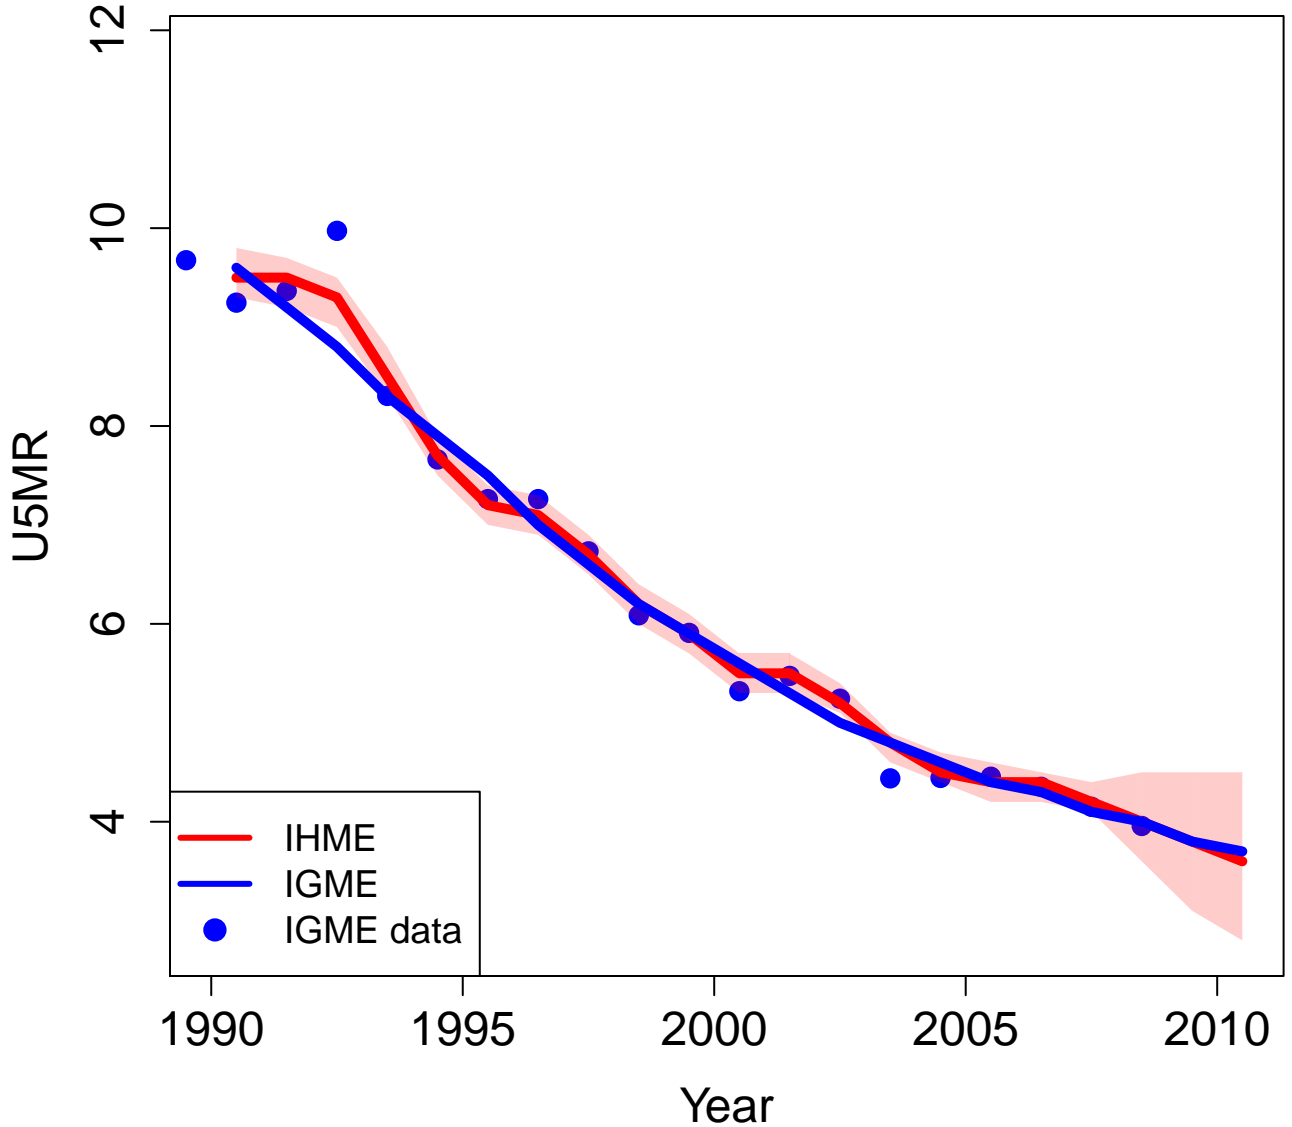

# Jamaica

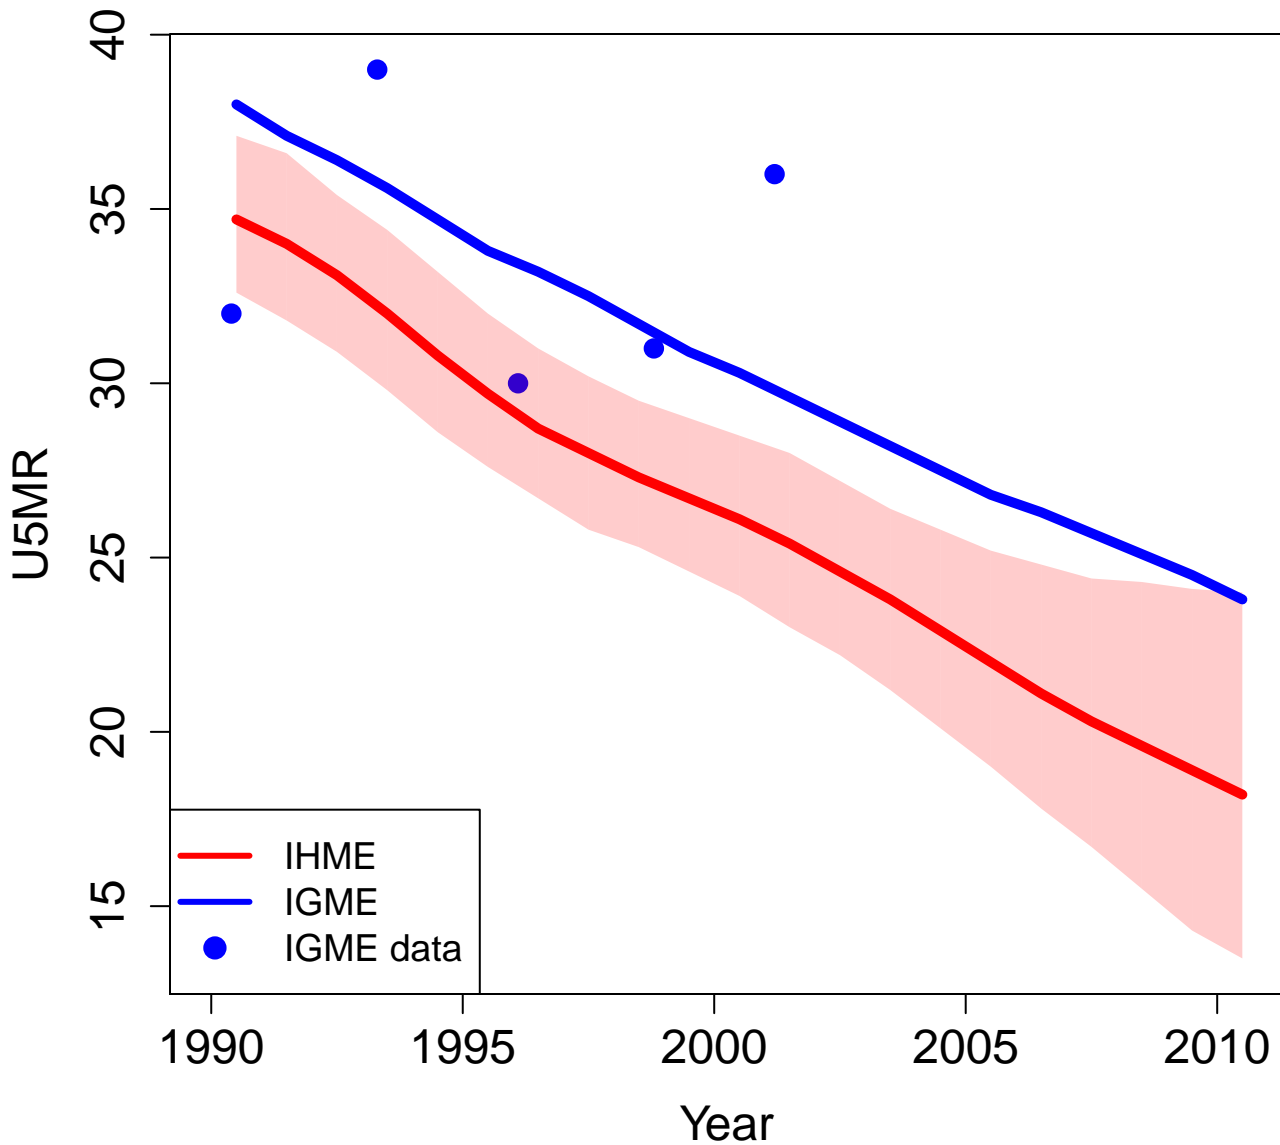

# Japan

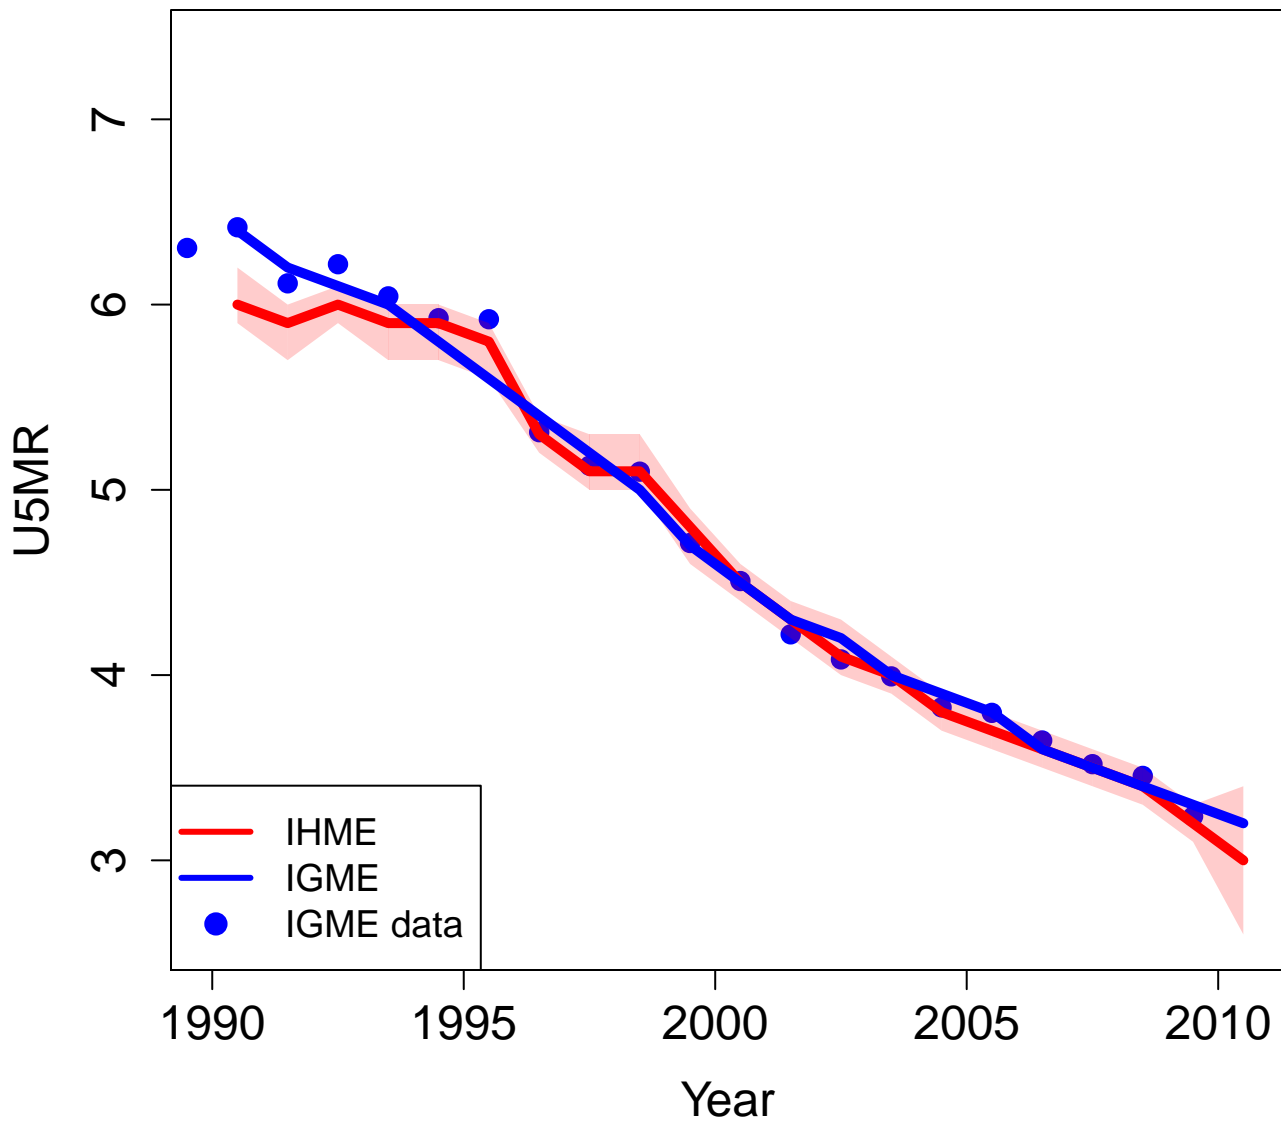

# Jordan

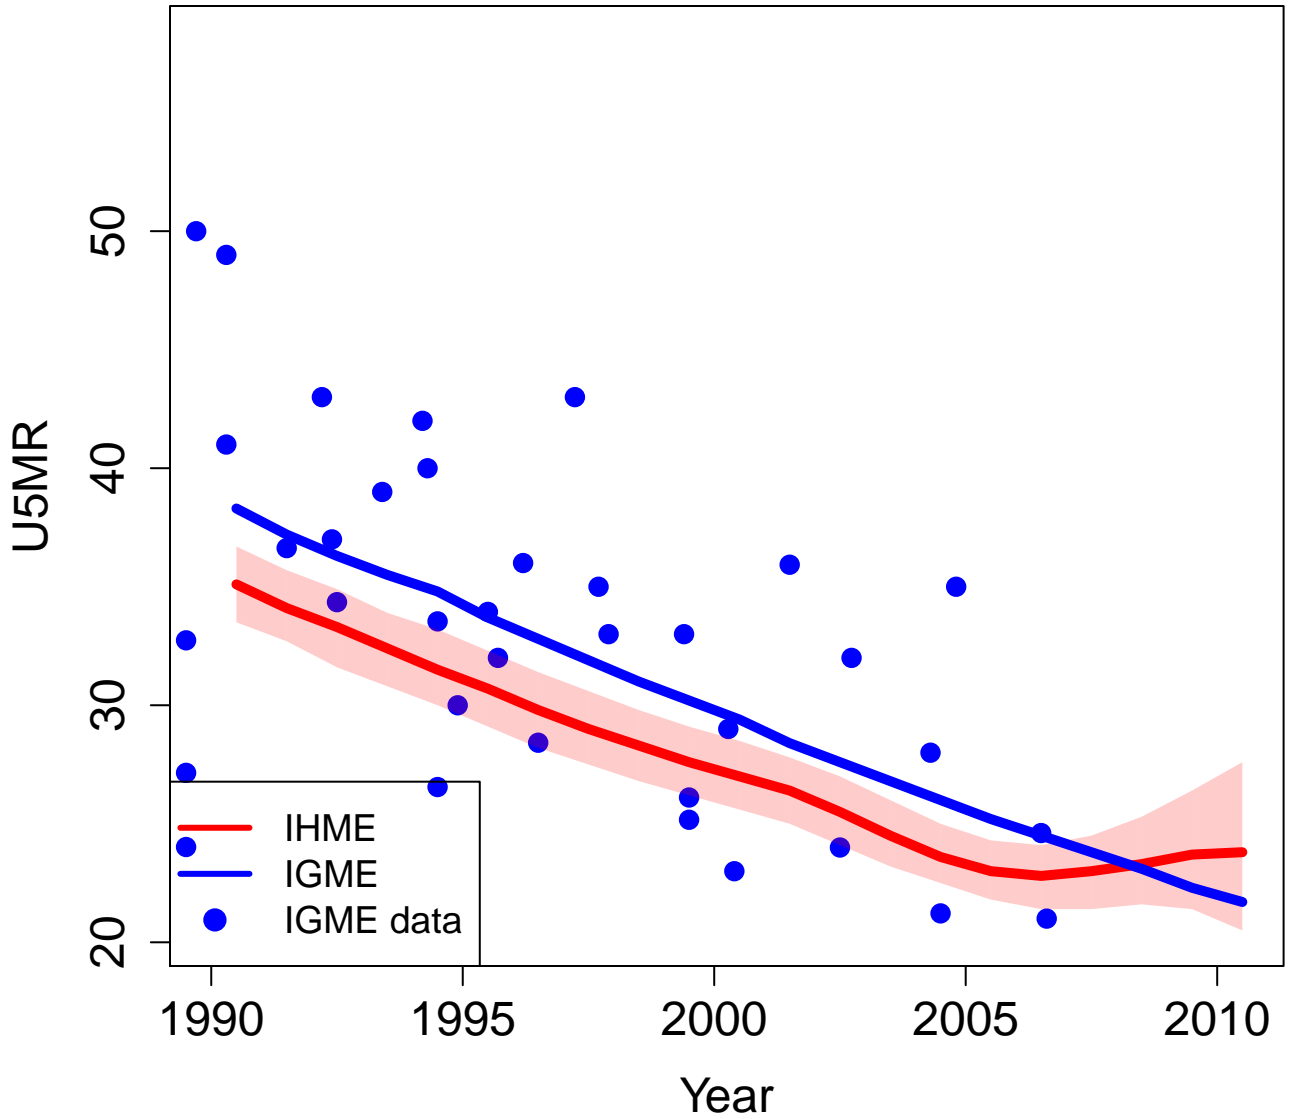

# Kazakhstan

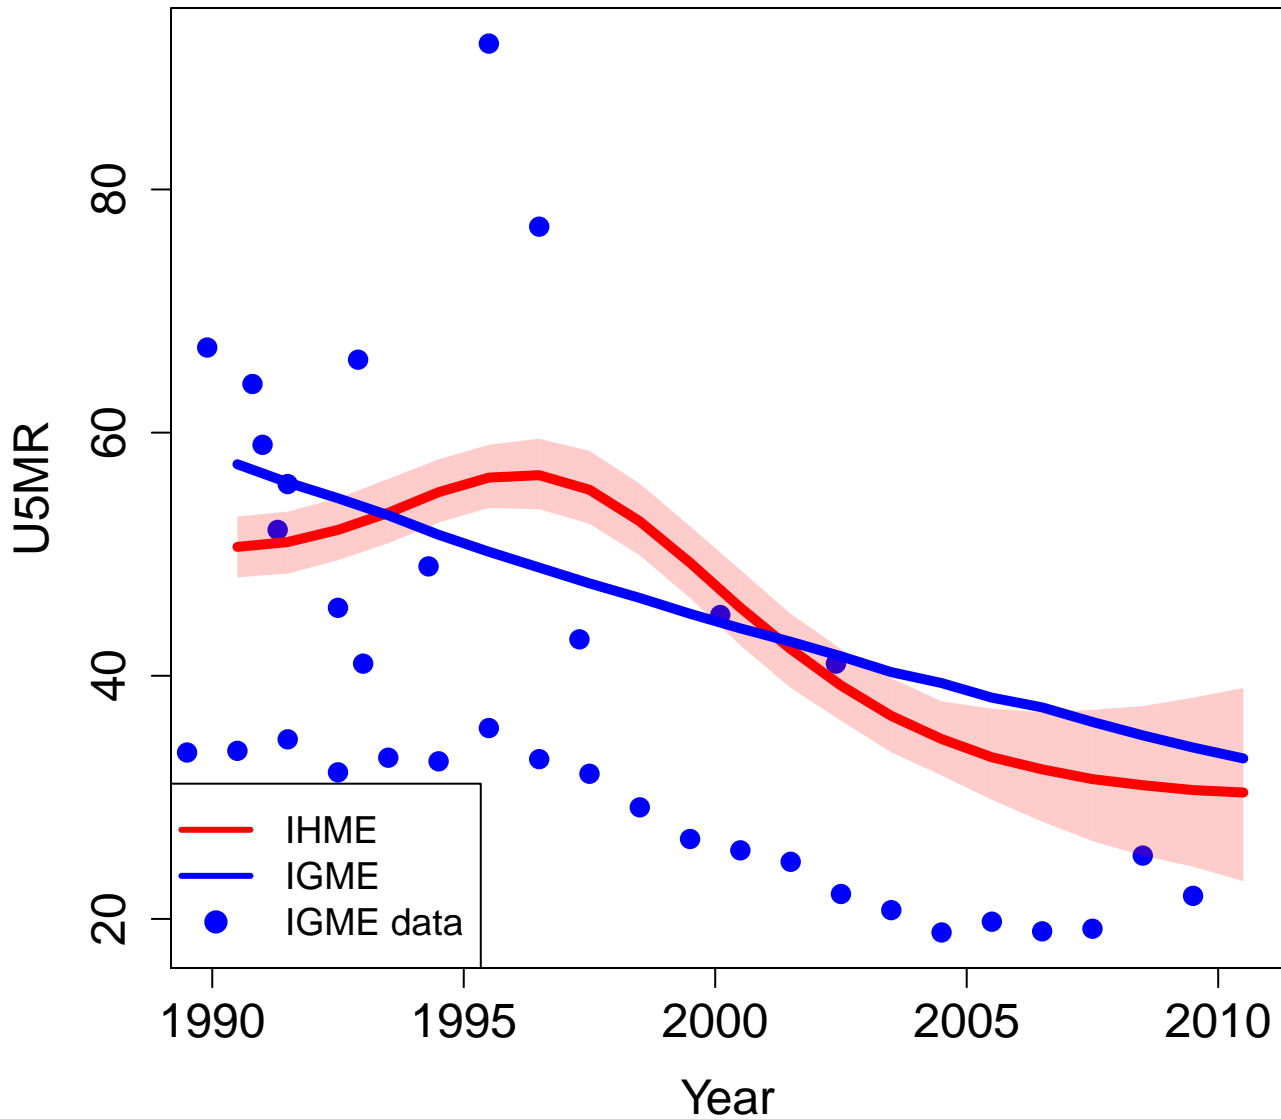

# Kenya

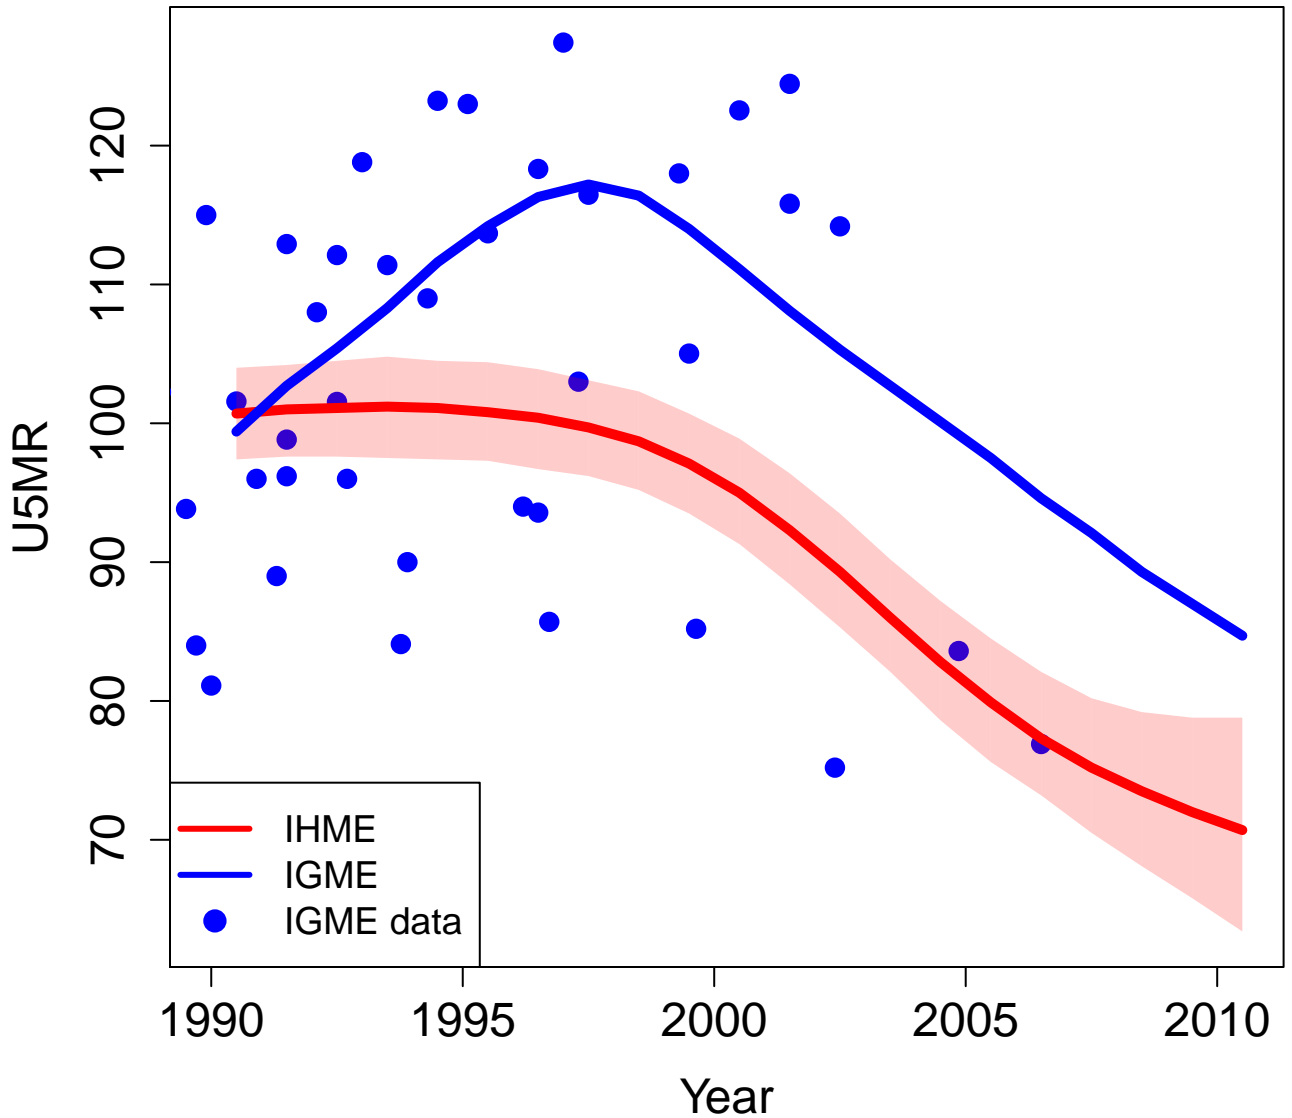



# Kiribati

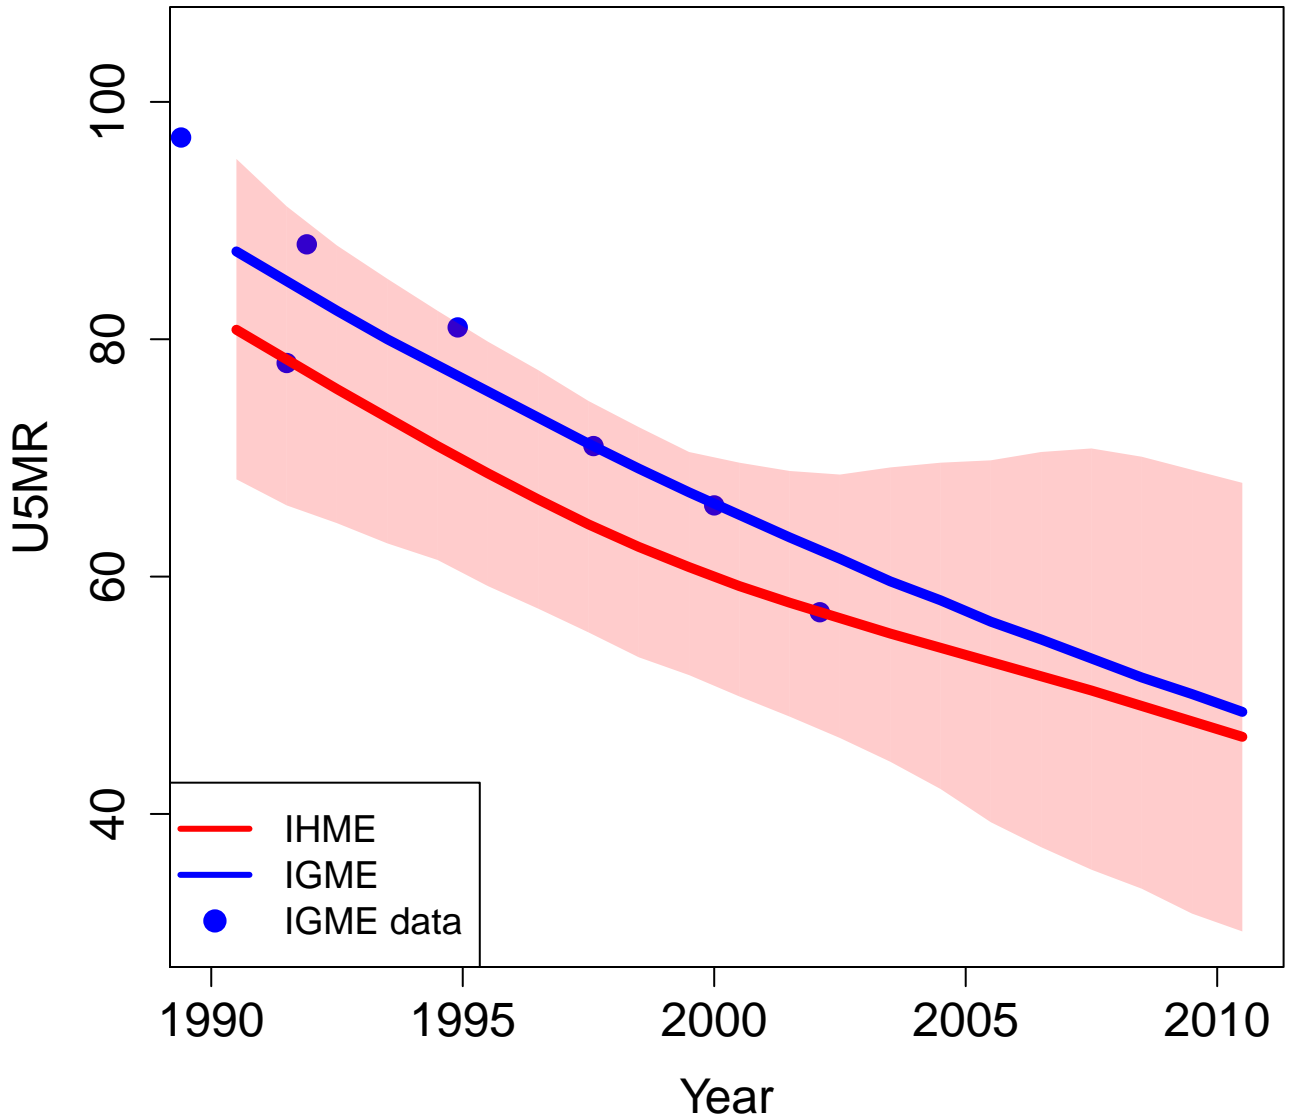

# Kuwait

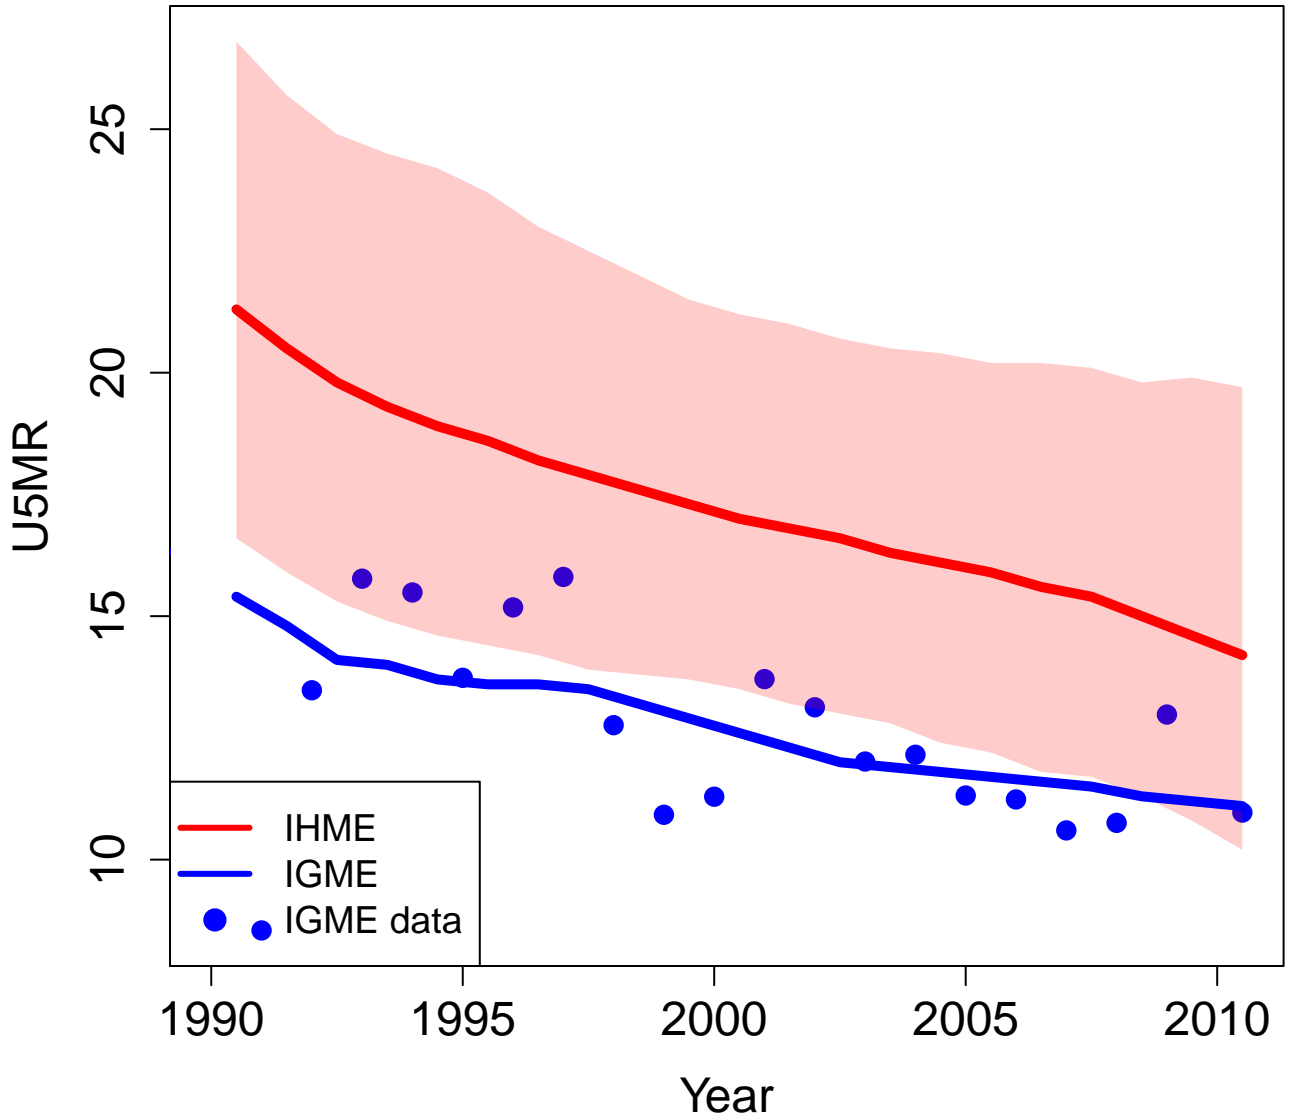

# Kyrgyzstan

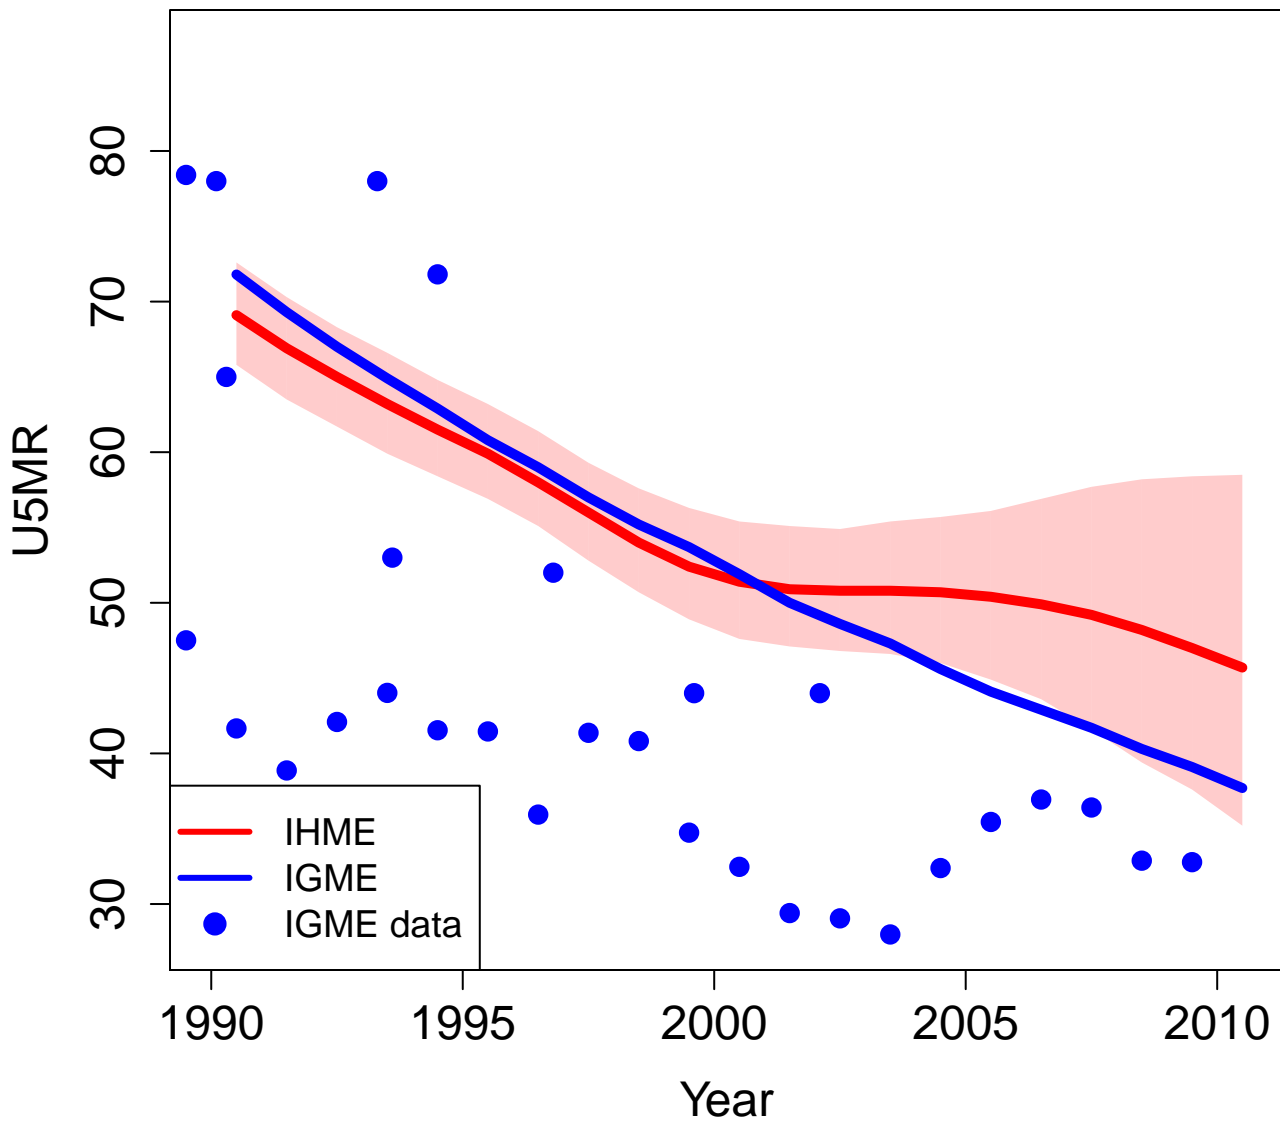

# Laos

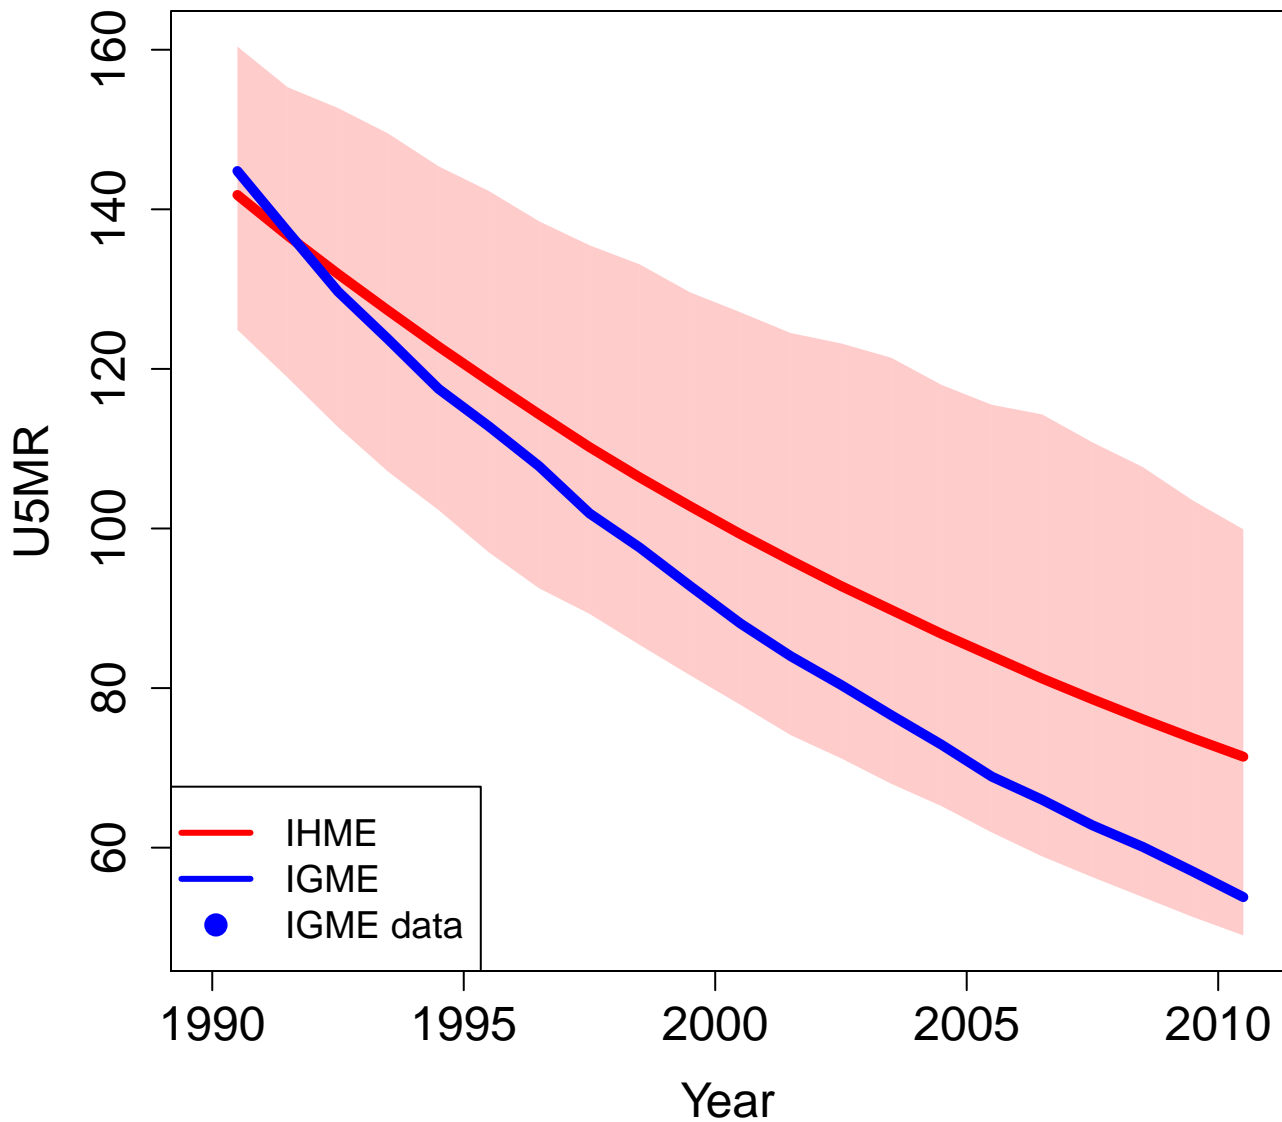

# Latvia

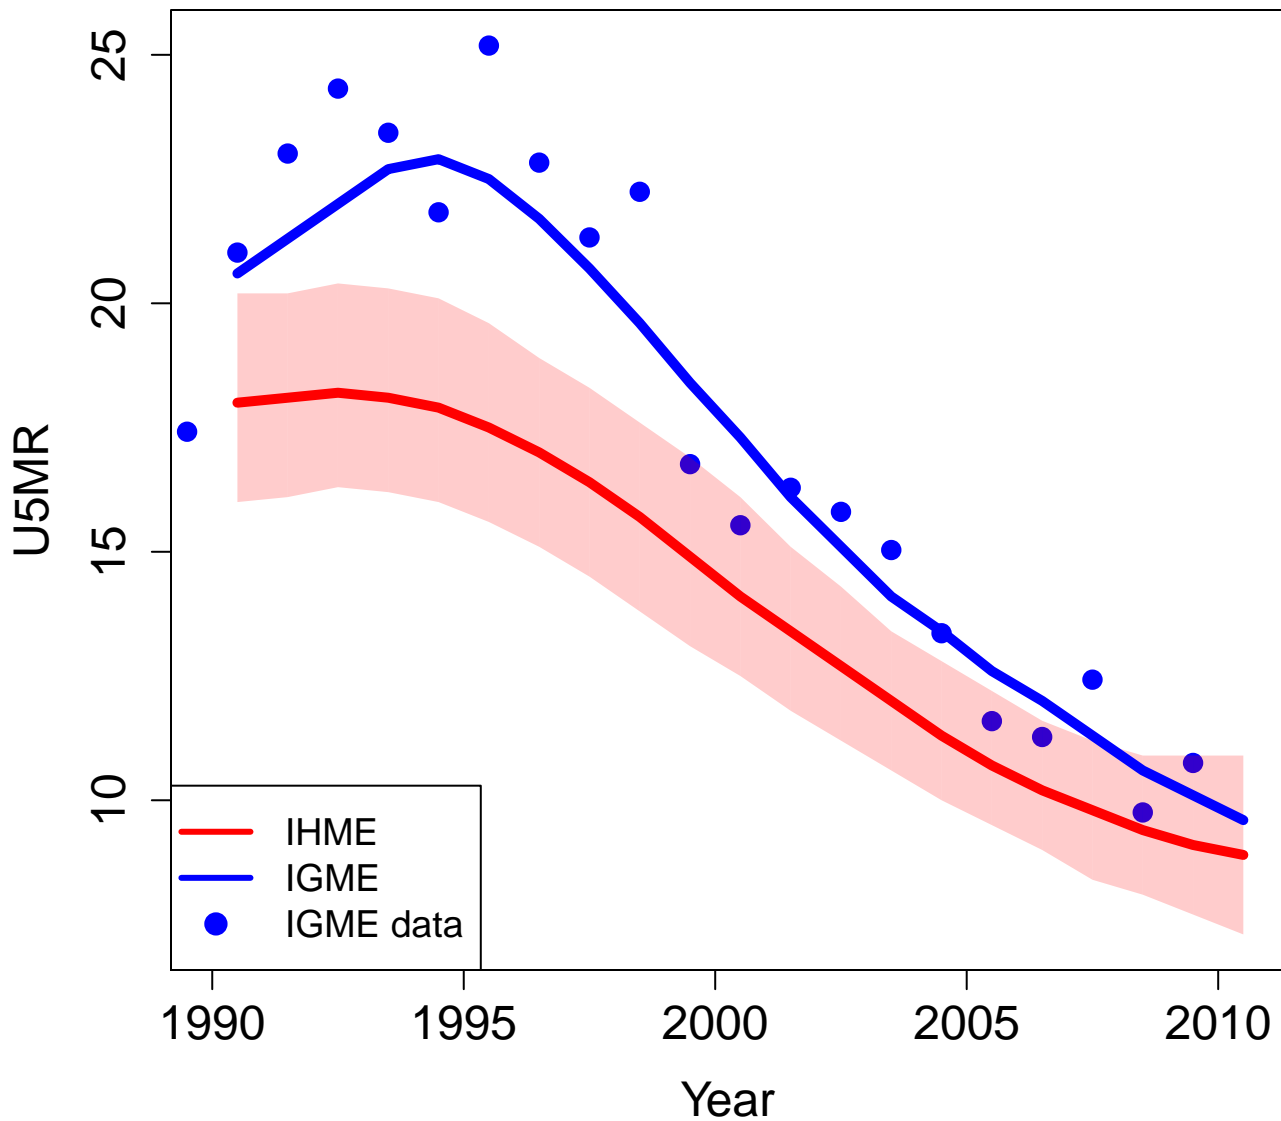

# Lebanon

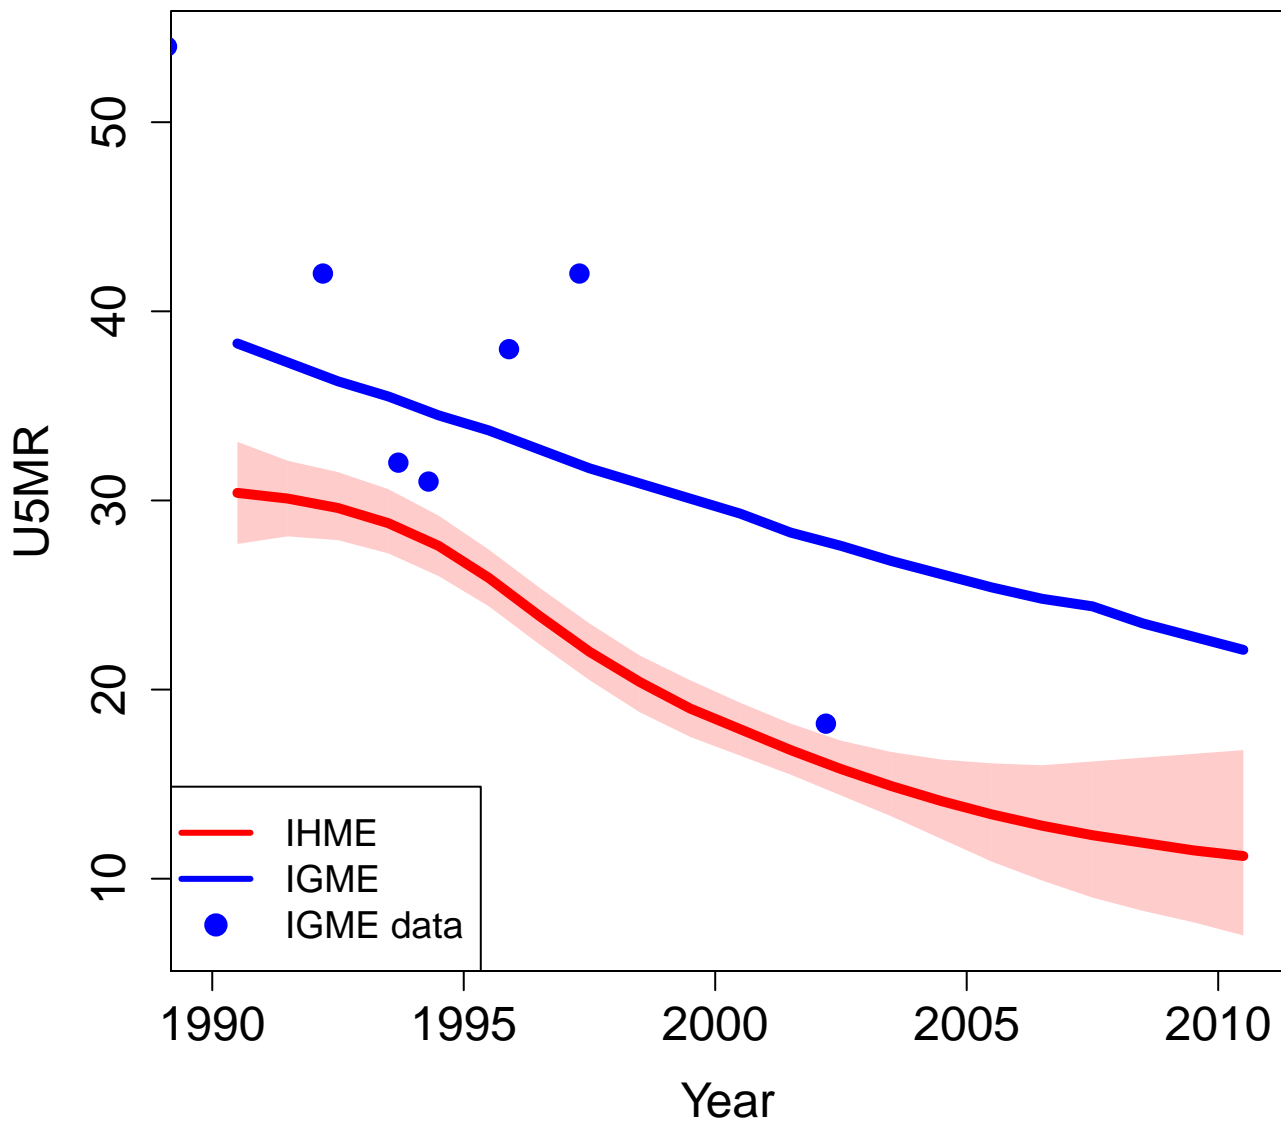

# Lesotho

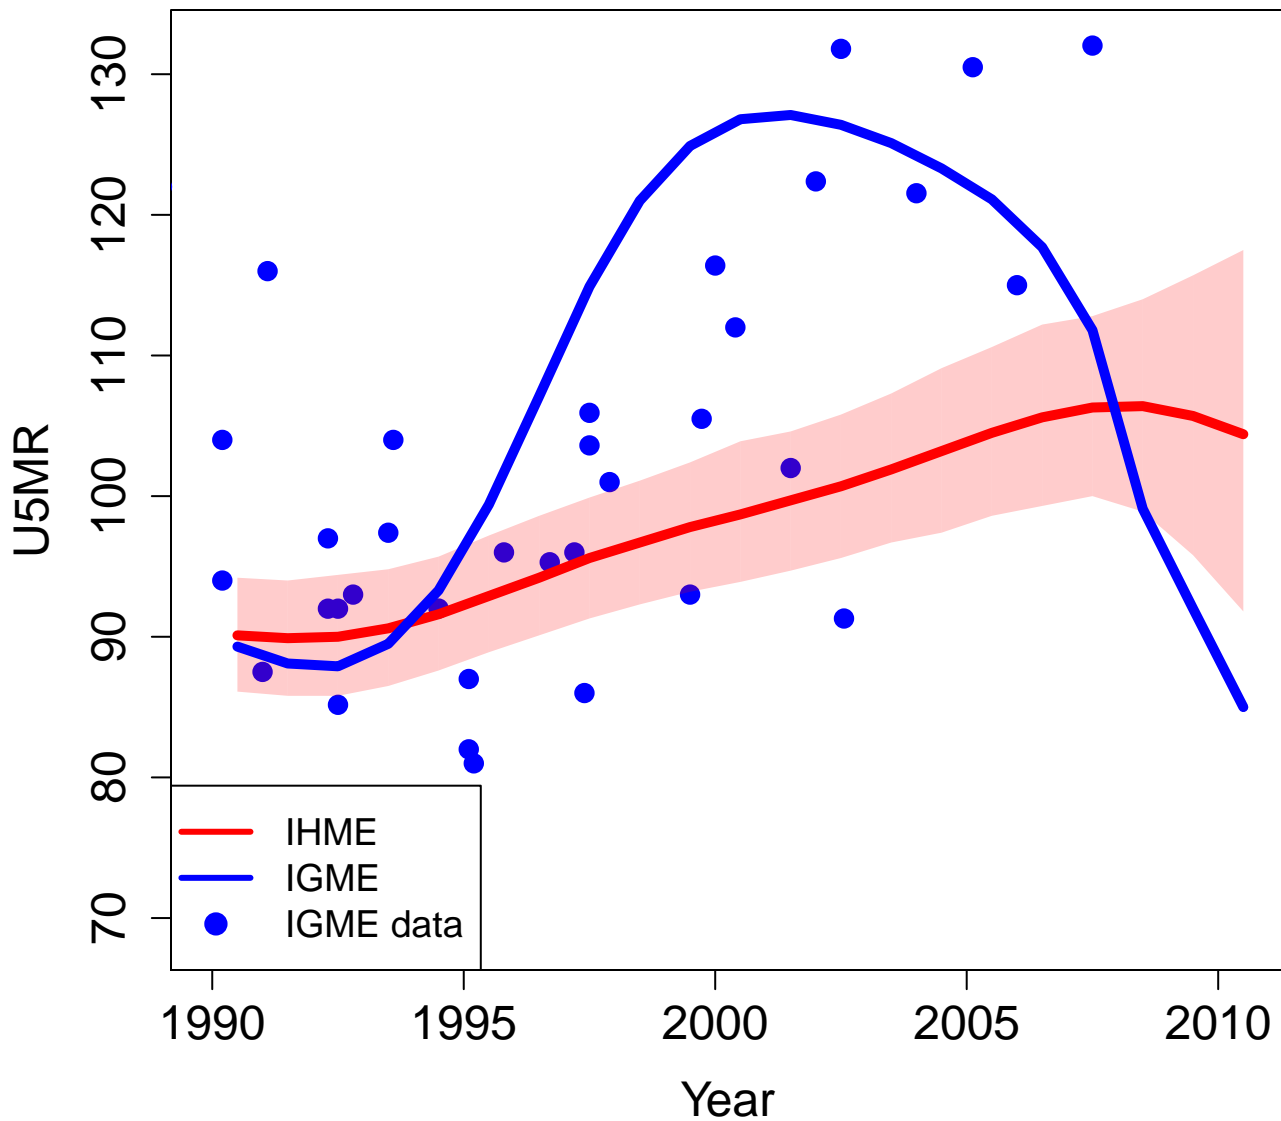

# Liberia

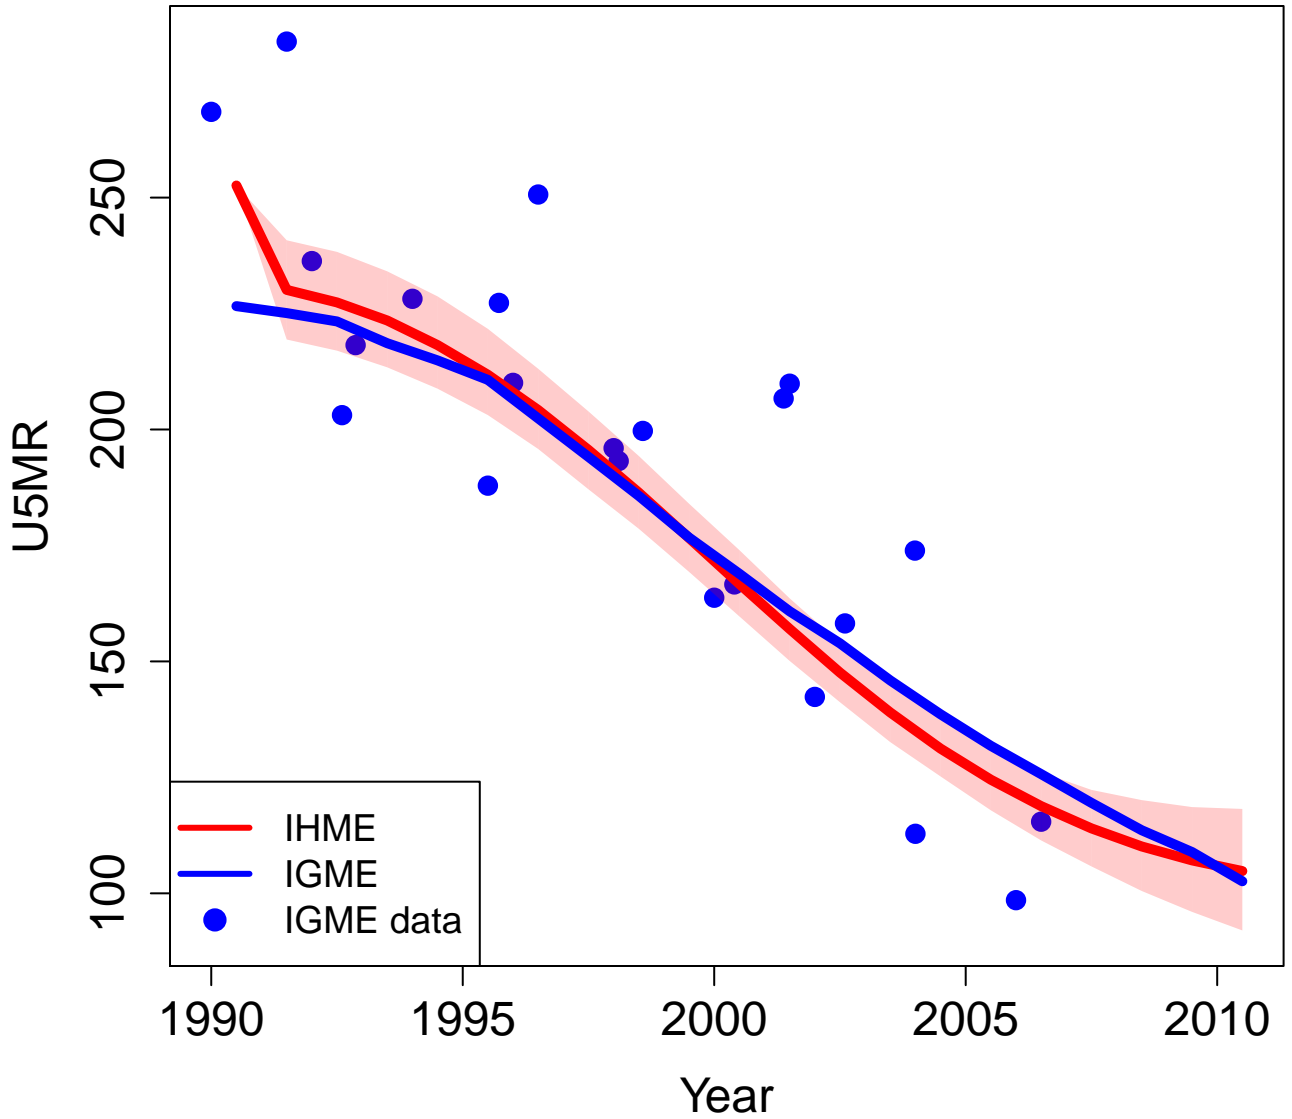



# Libya

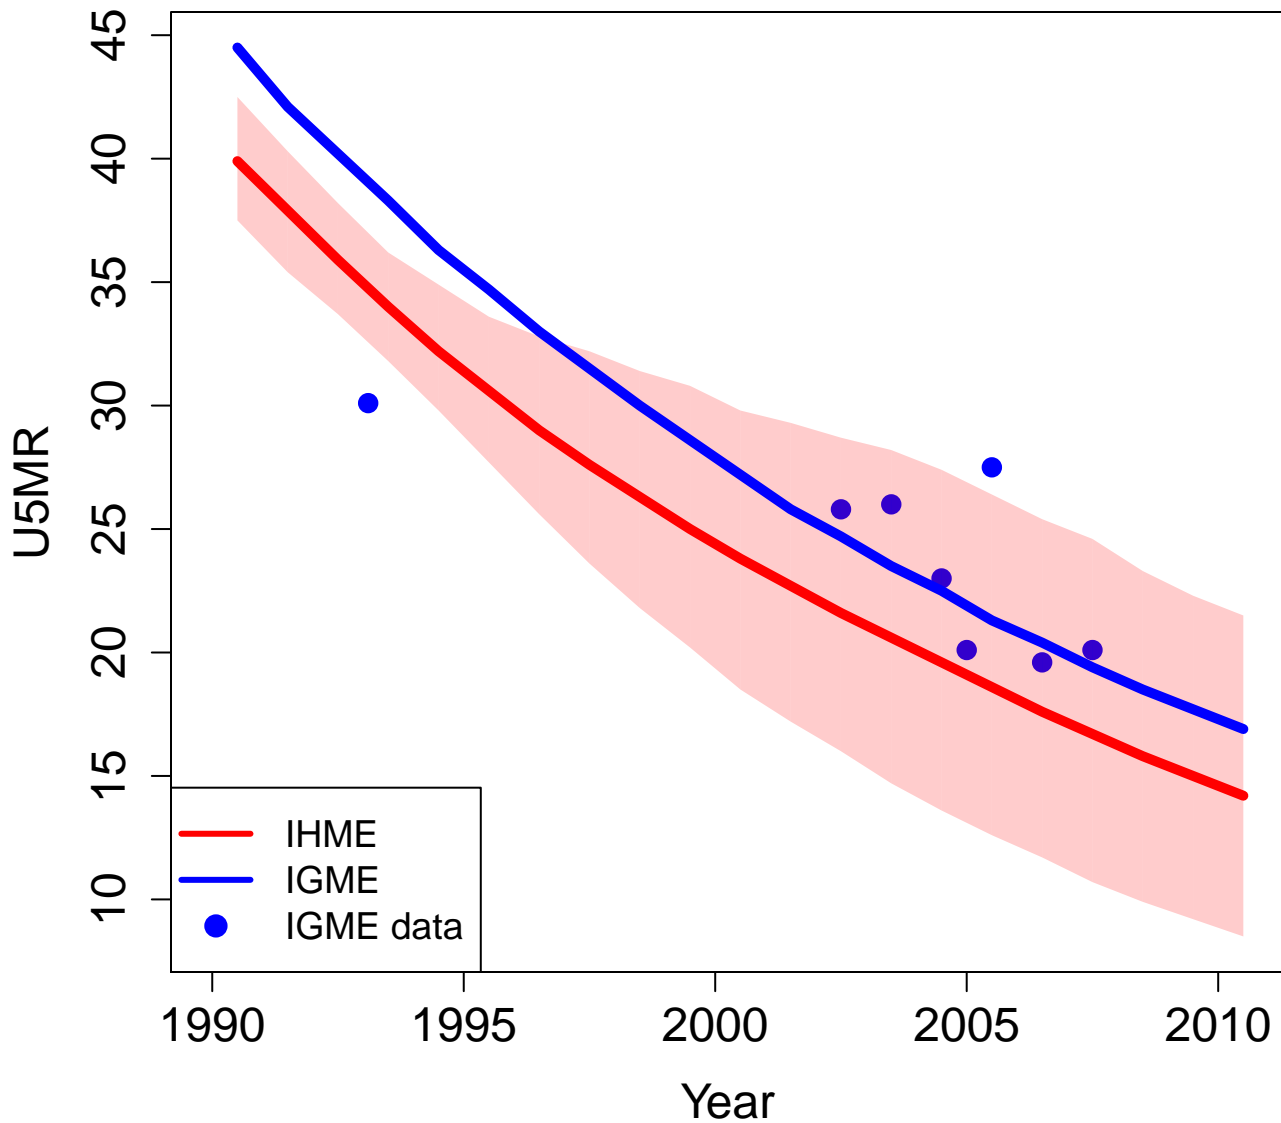

# Lithuania

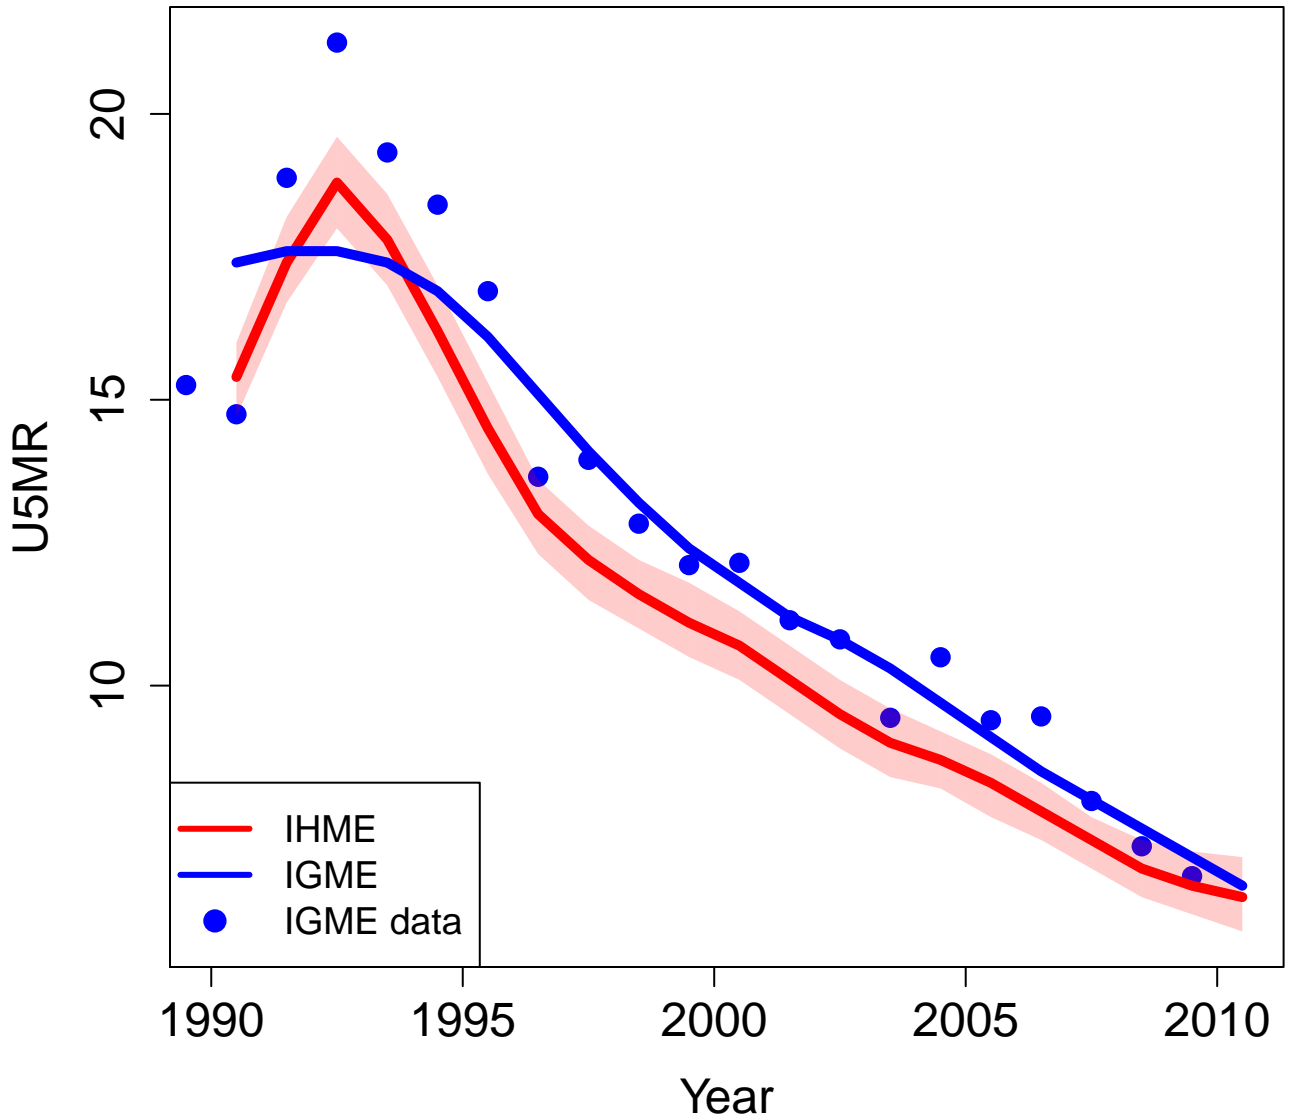

# Luxembourg

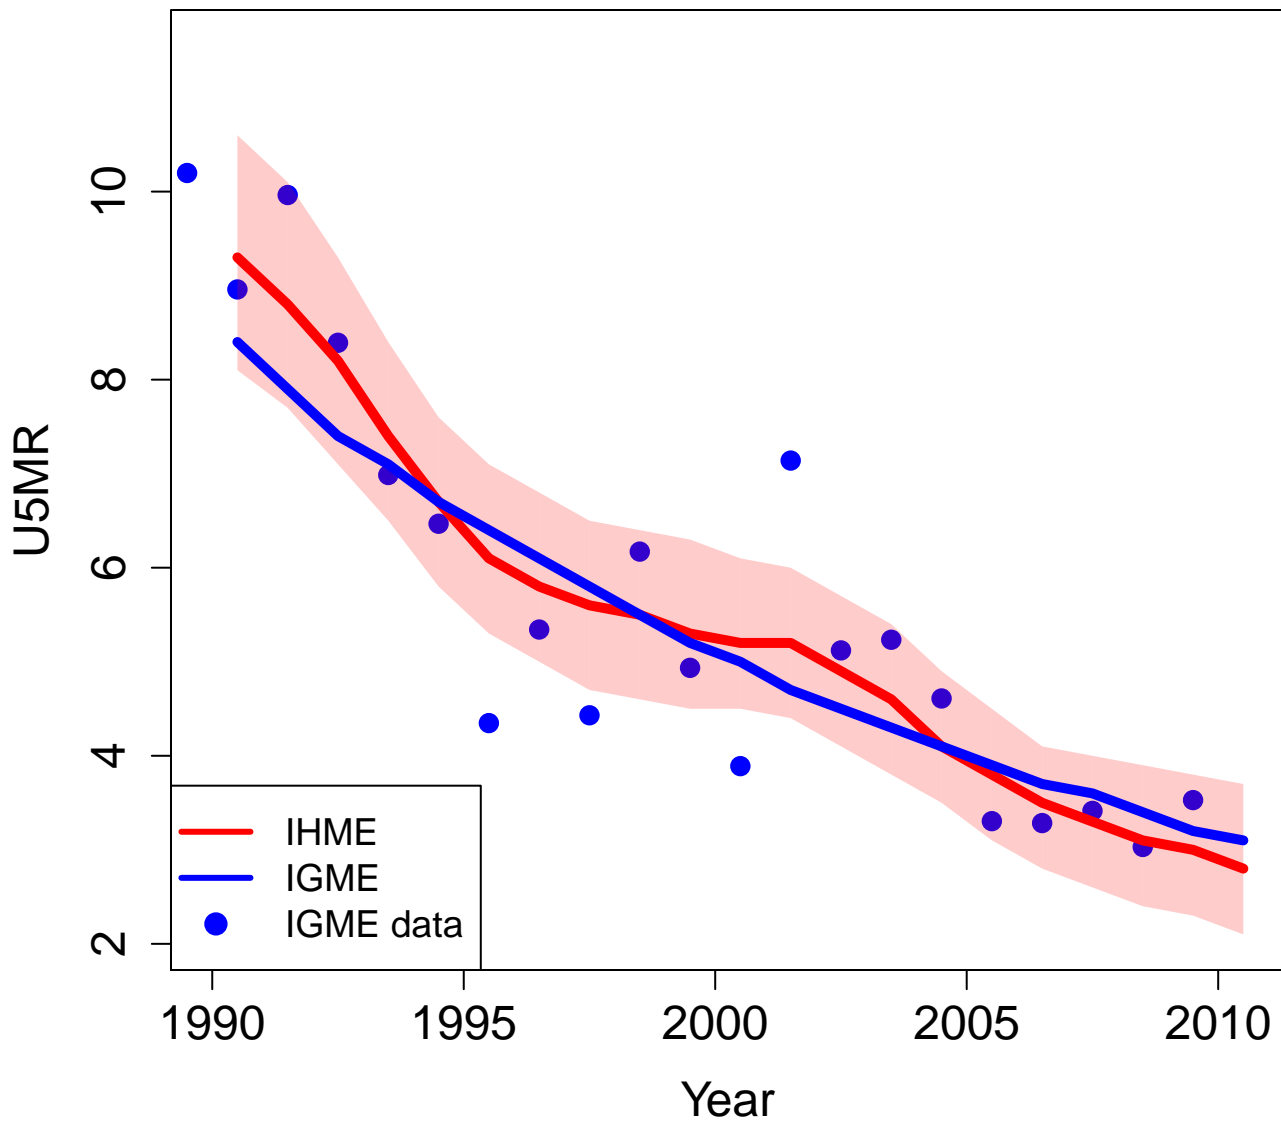

# Madagascar

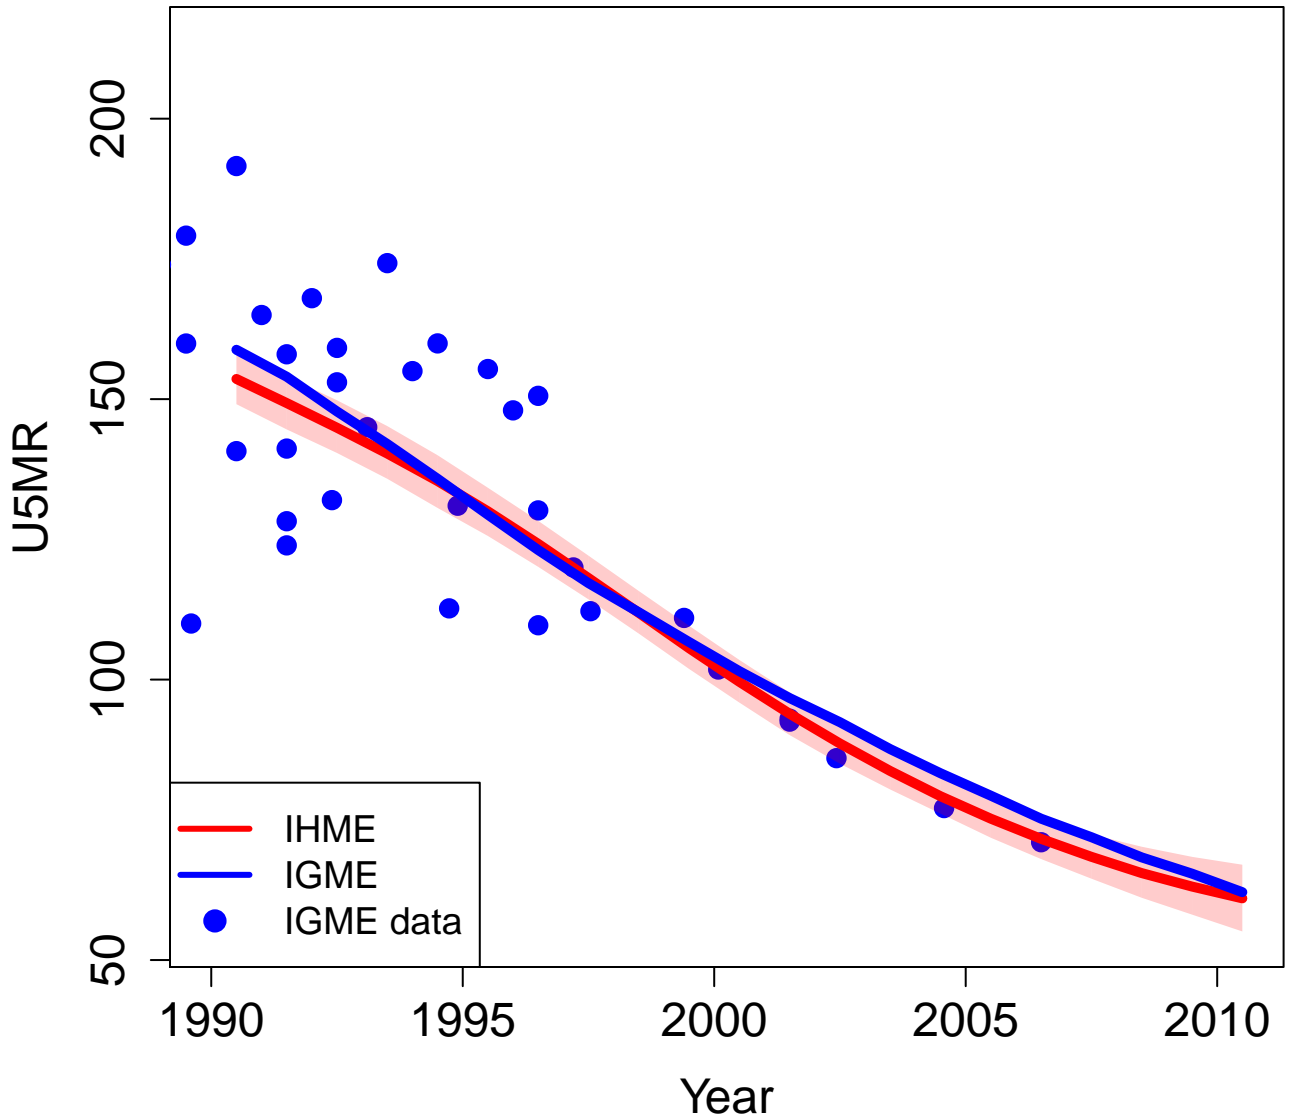

# Malawi

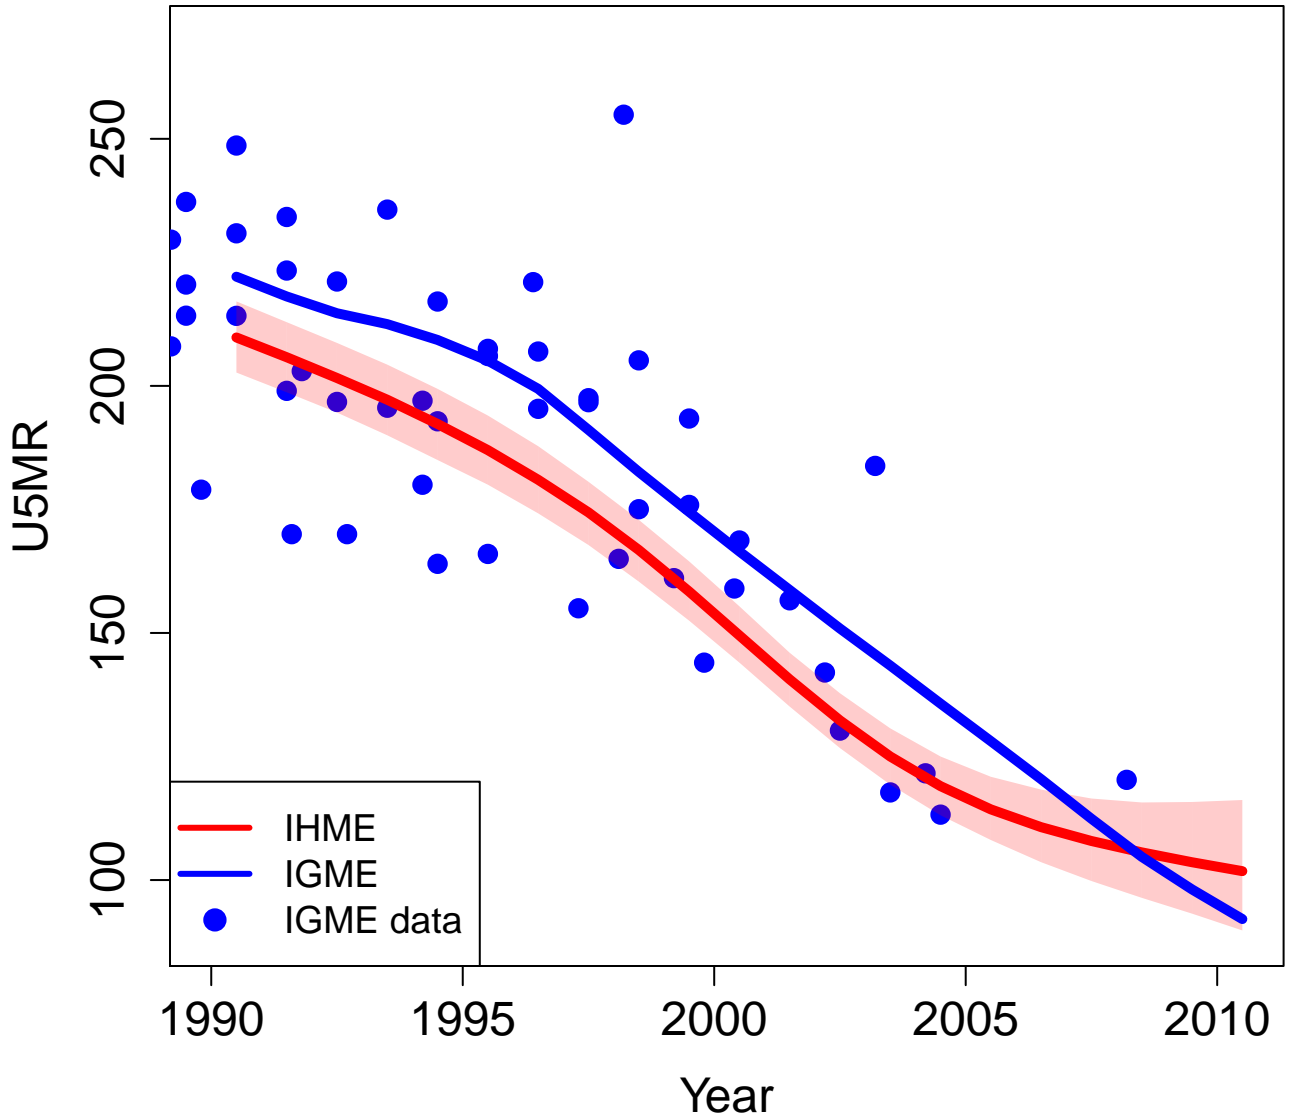

# Malaysia

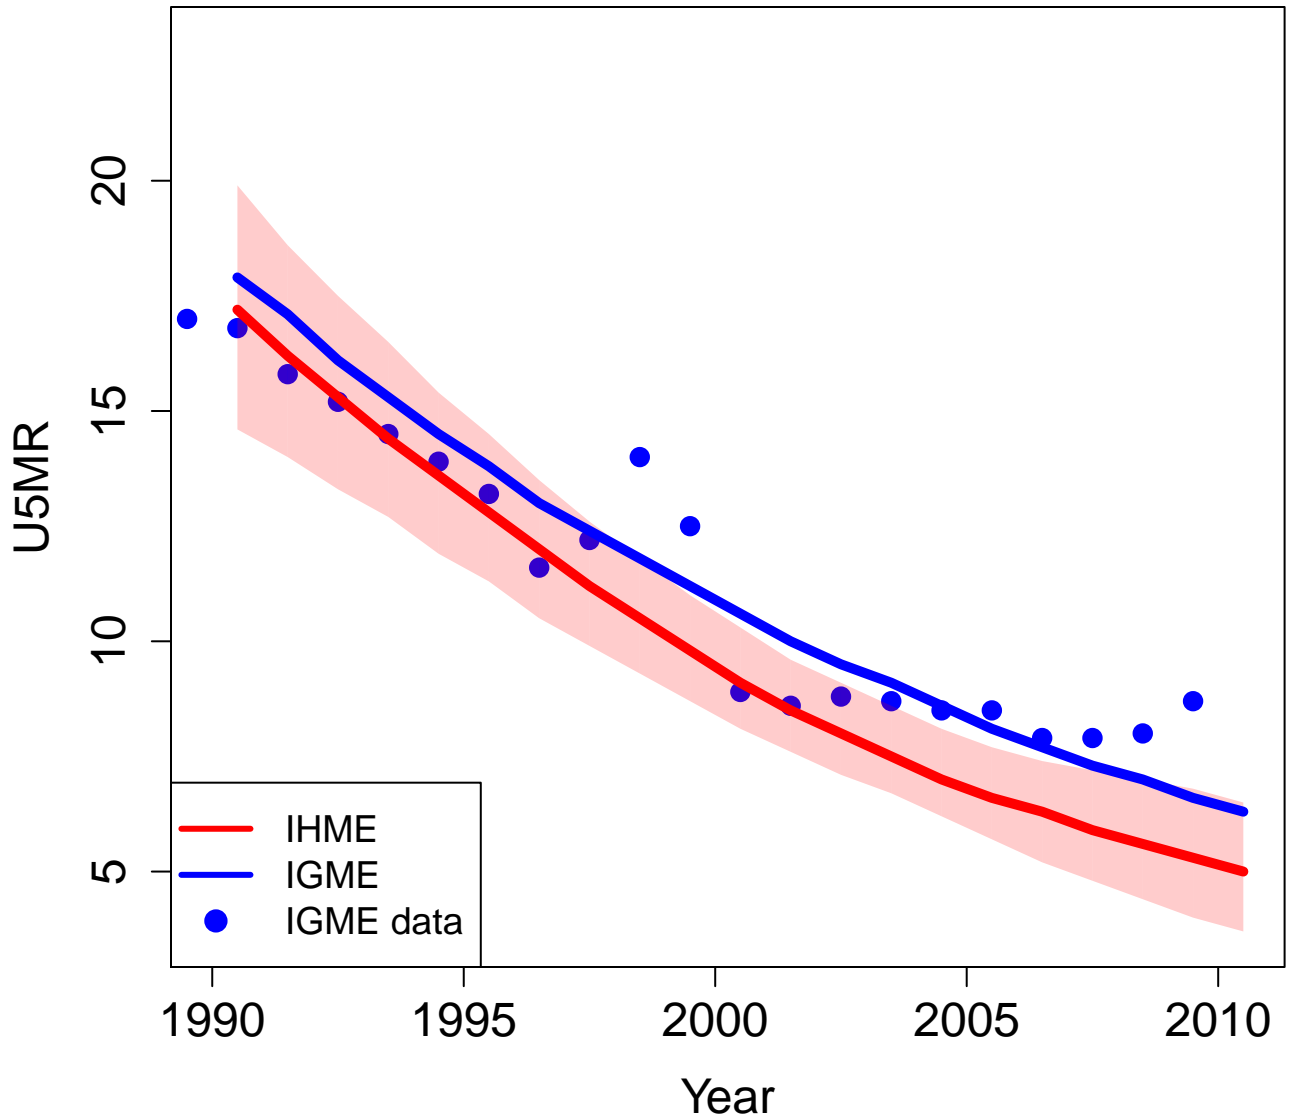

# Maldives

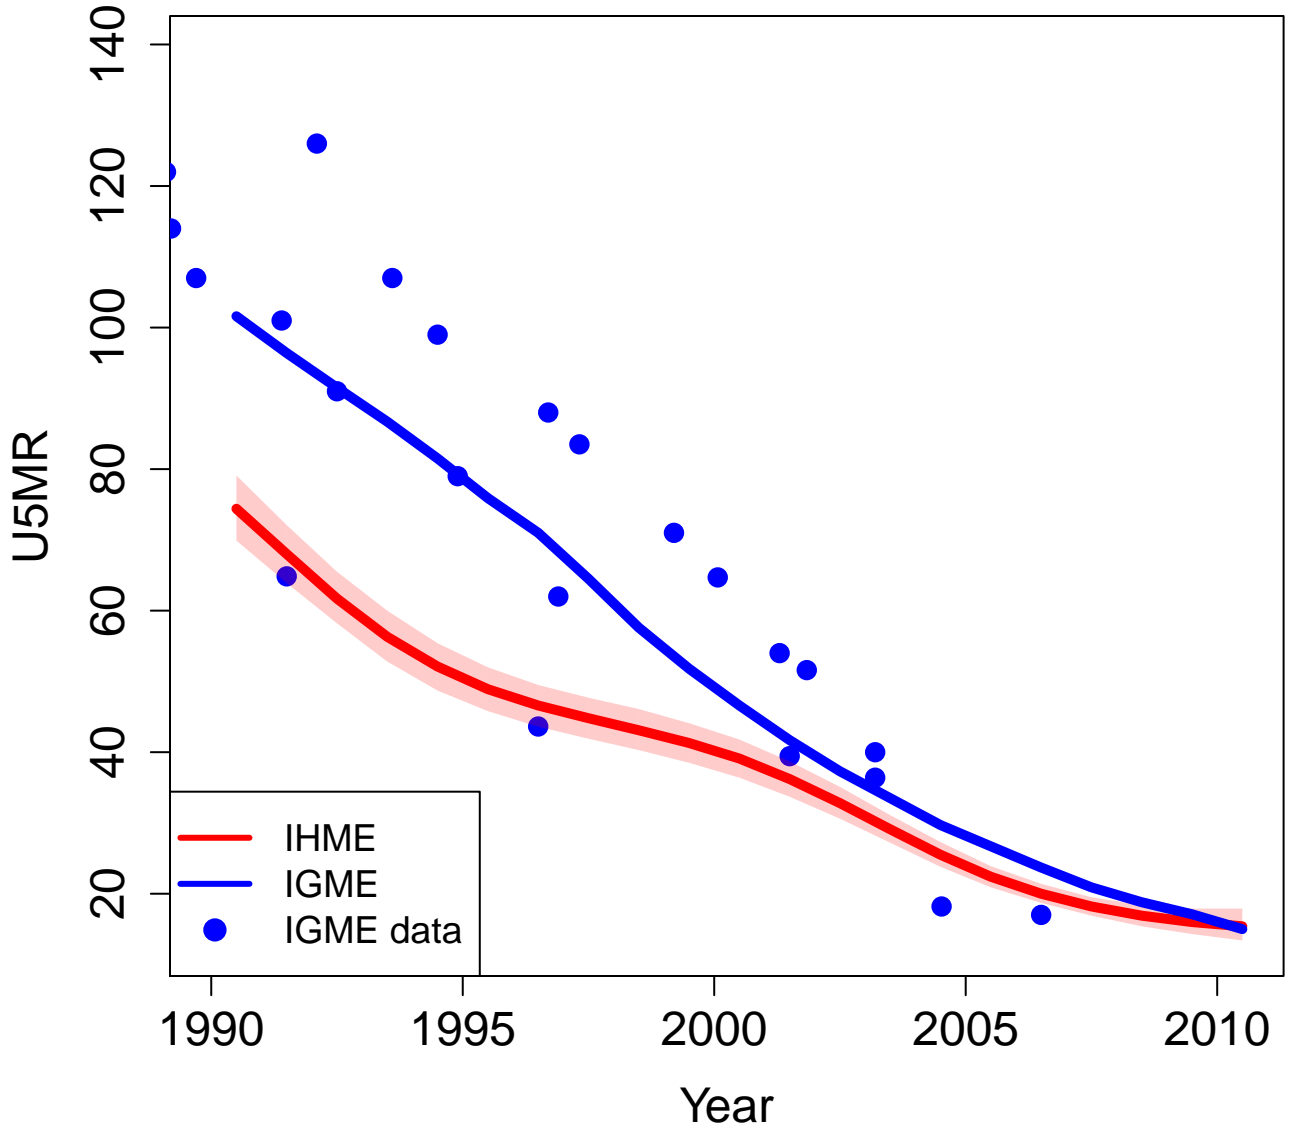

# Mali

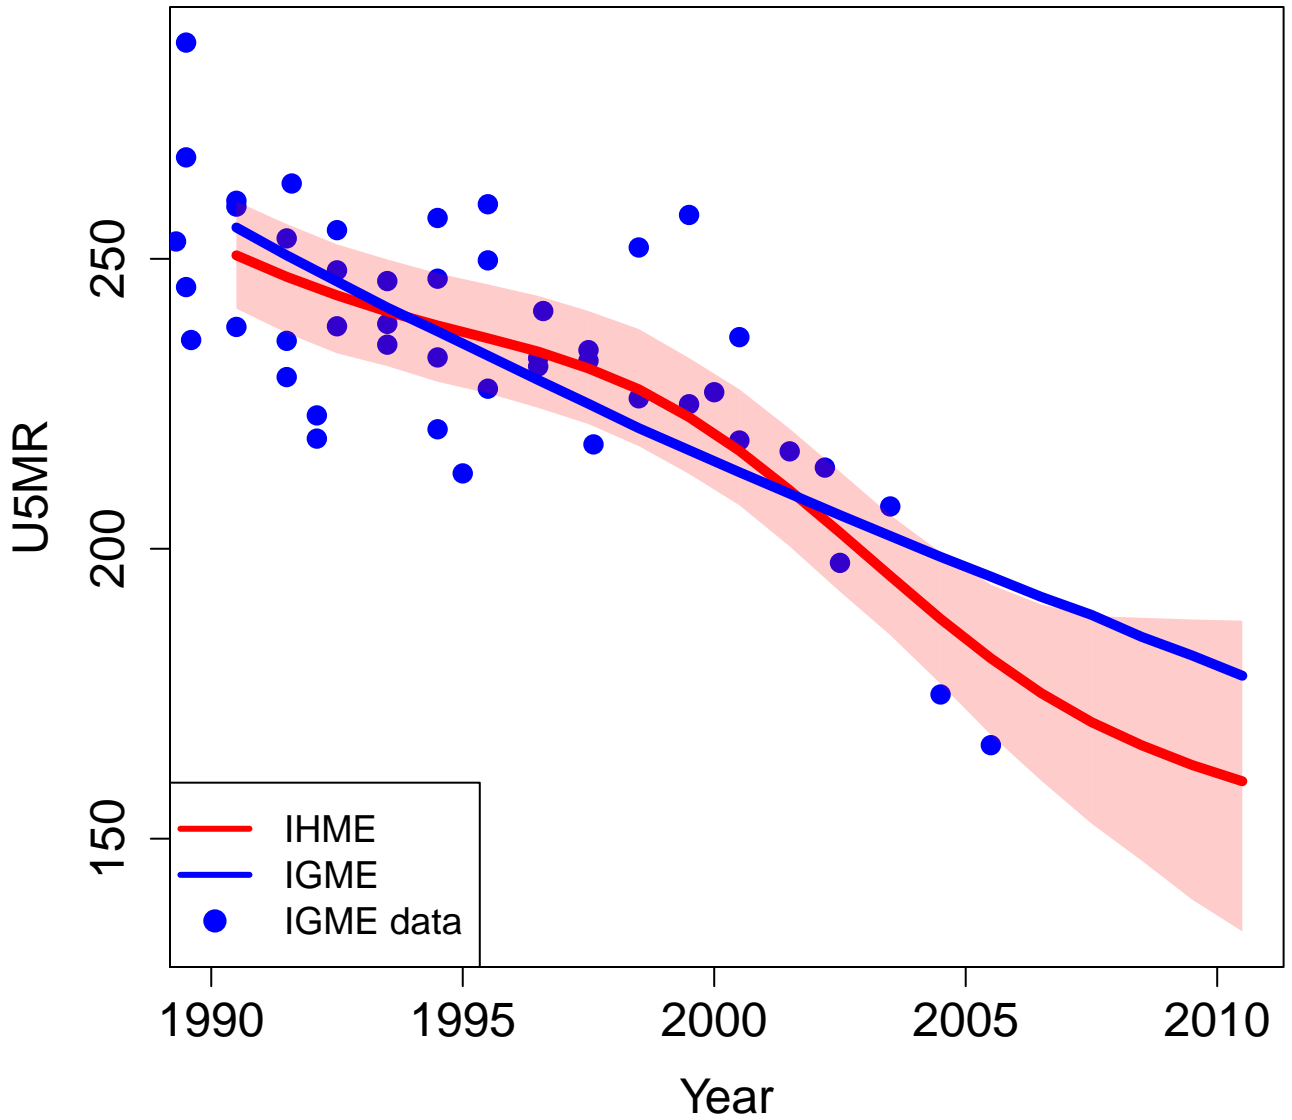



# Malta

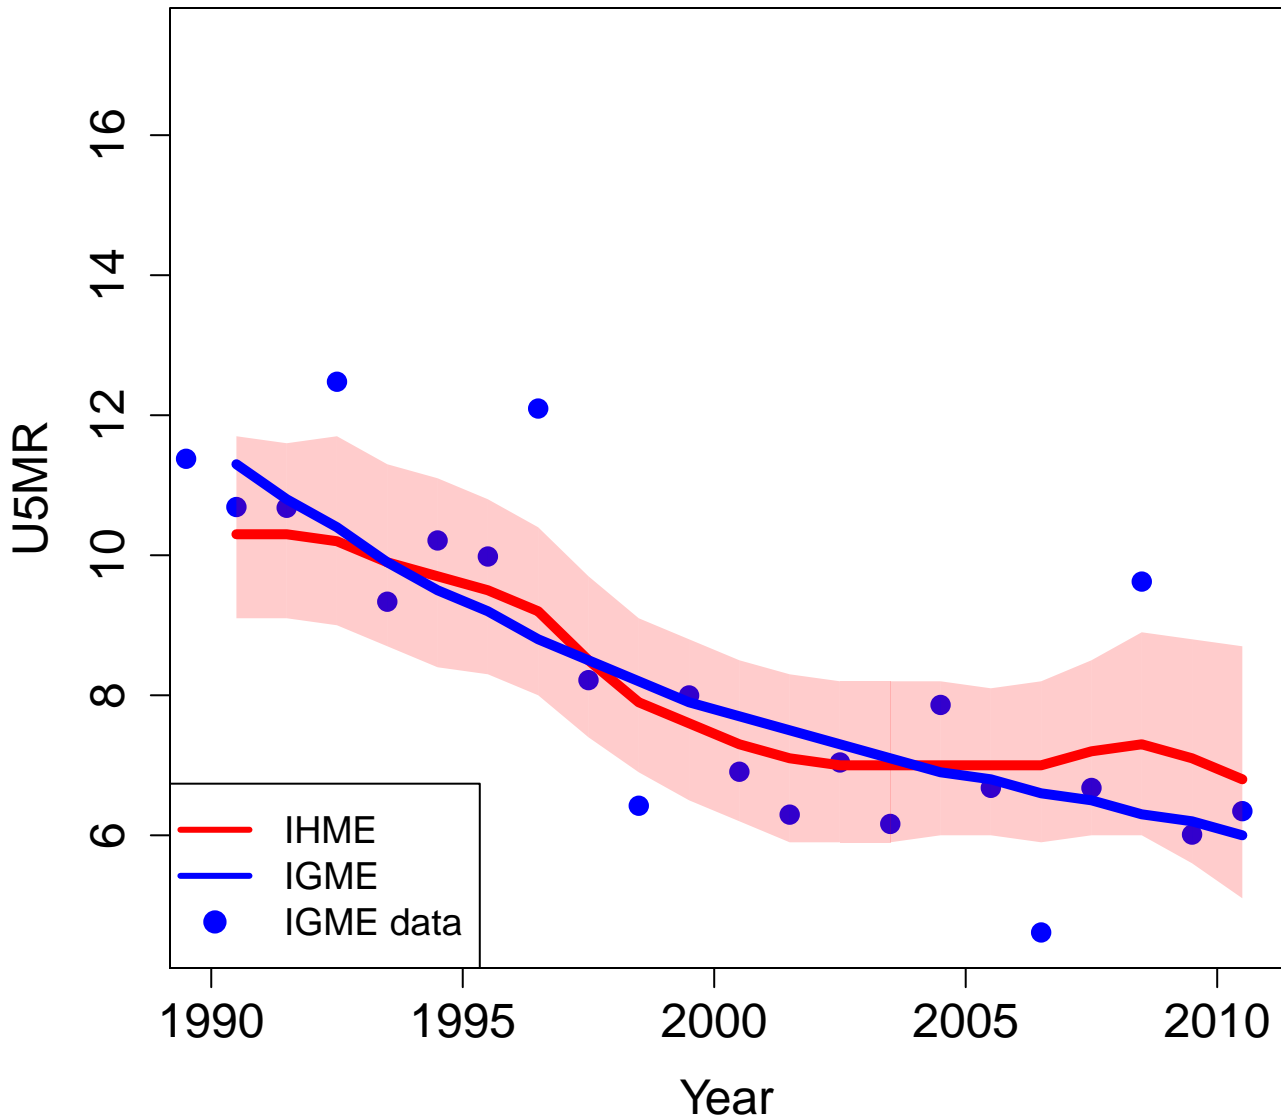

# Marshall Islands

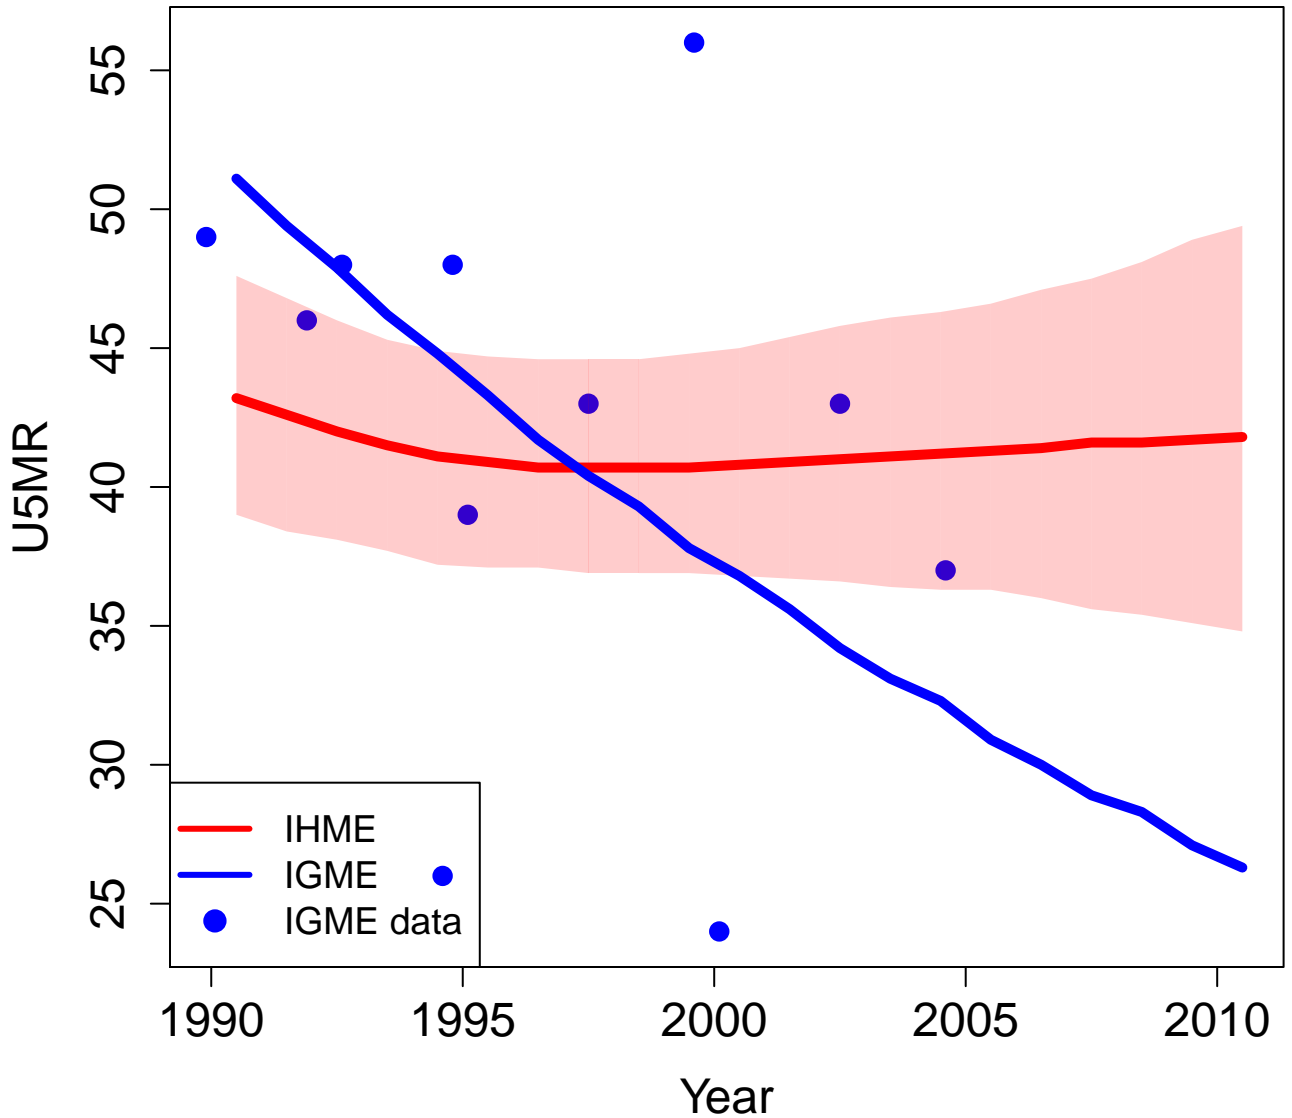

# Mauritania

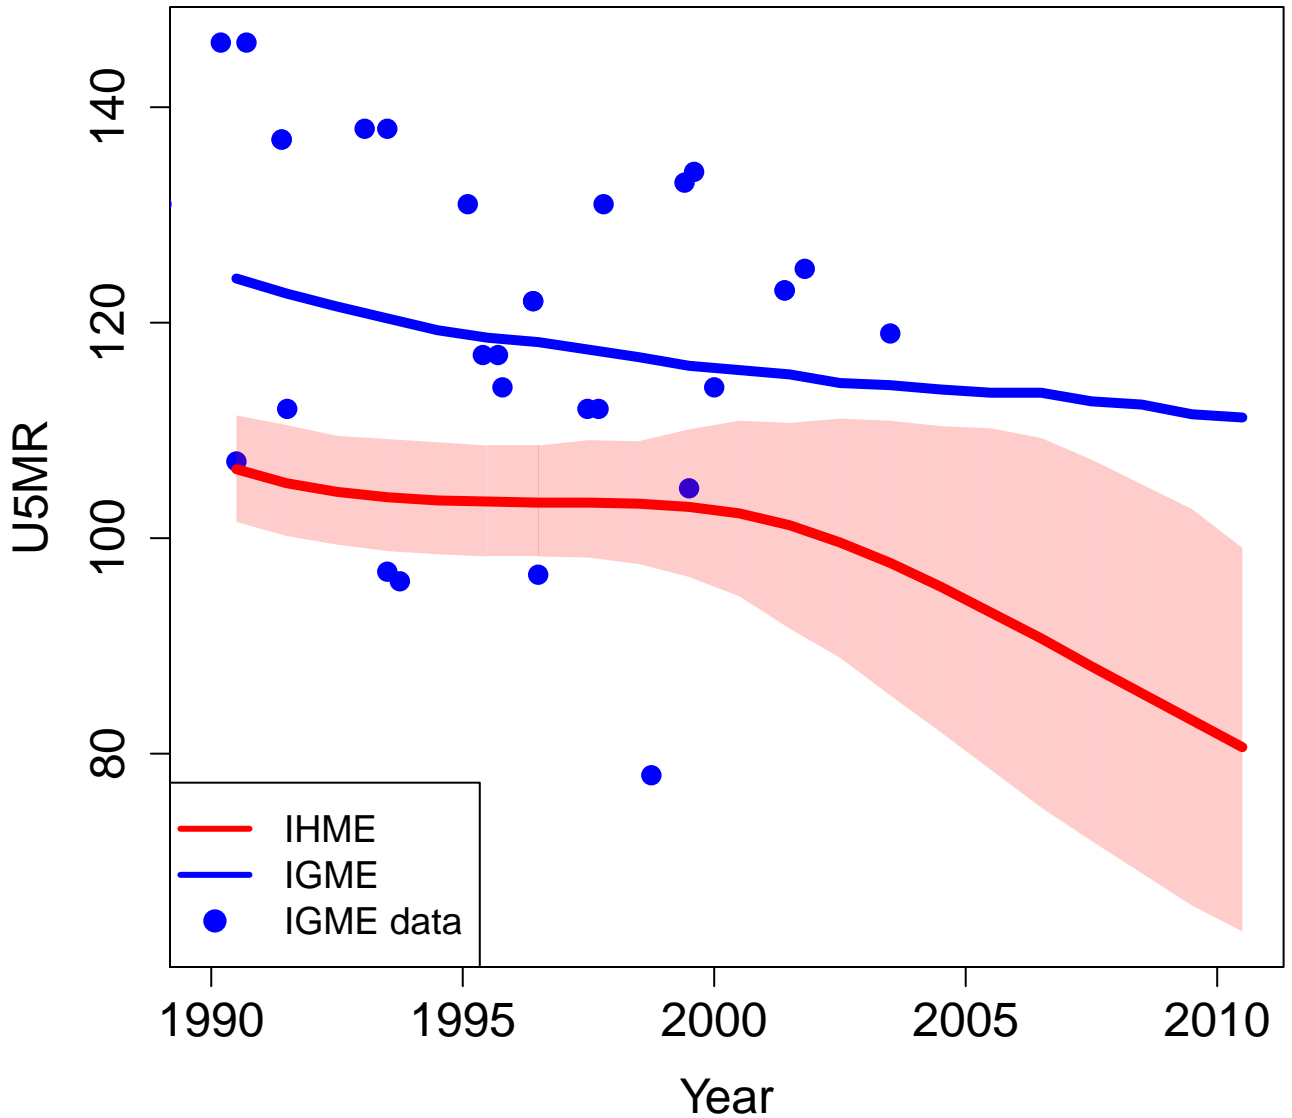

# Mauritius

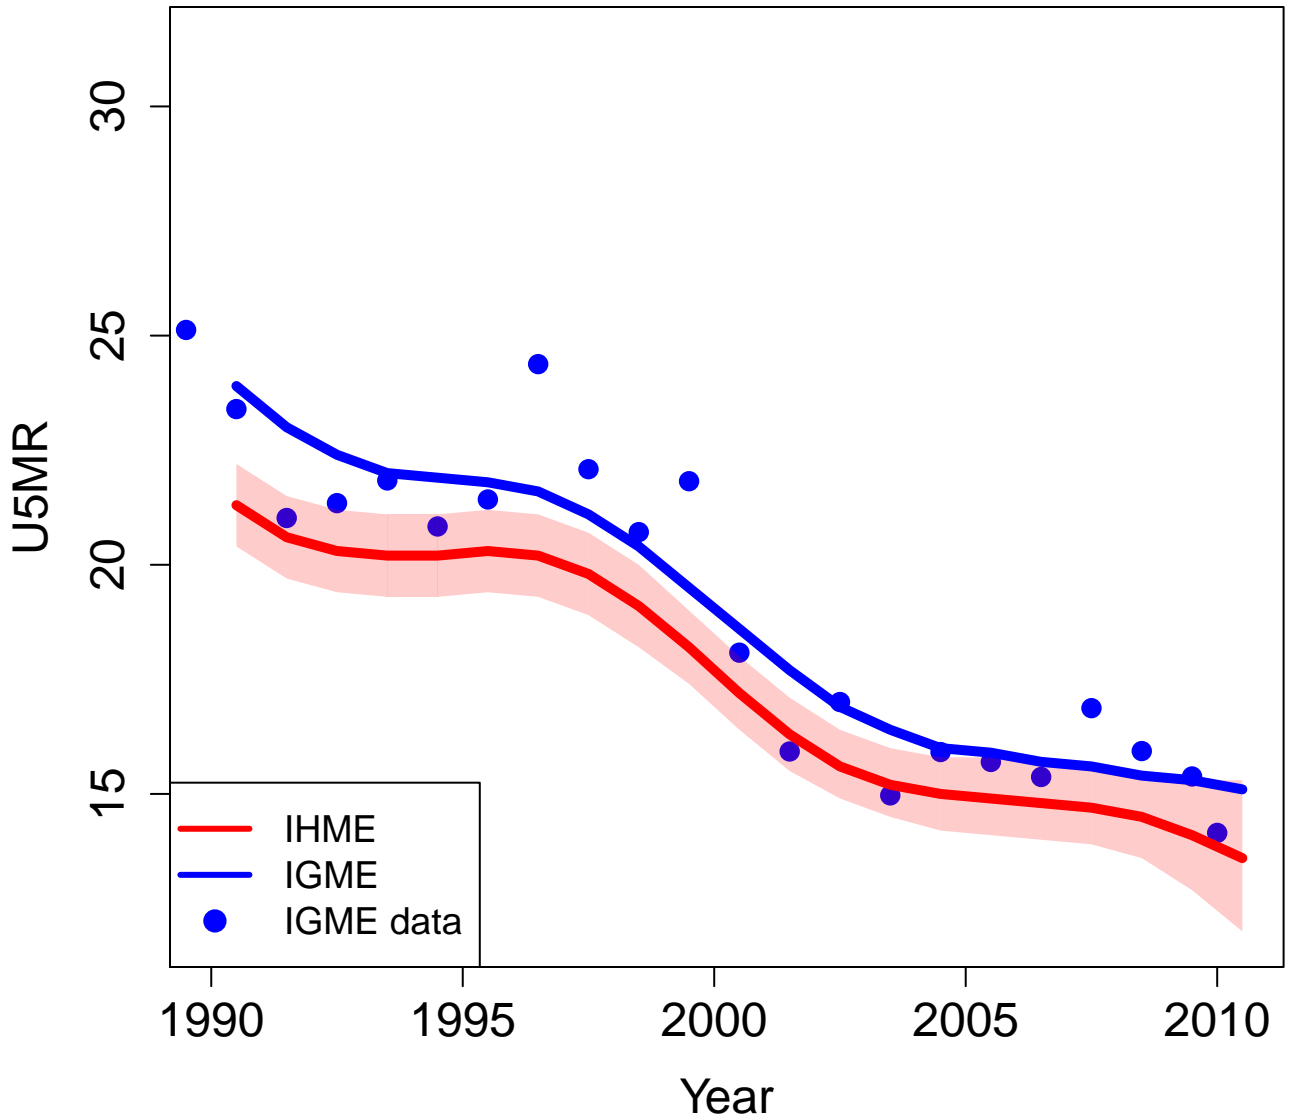

# Mexico

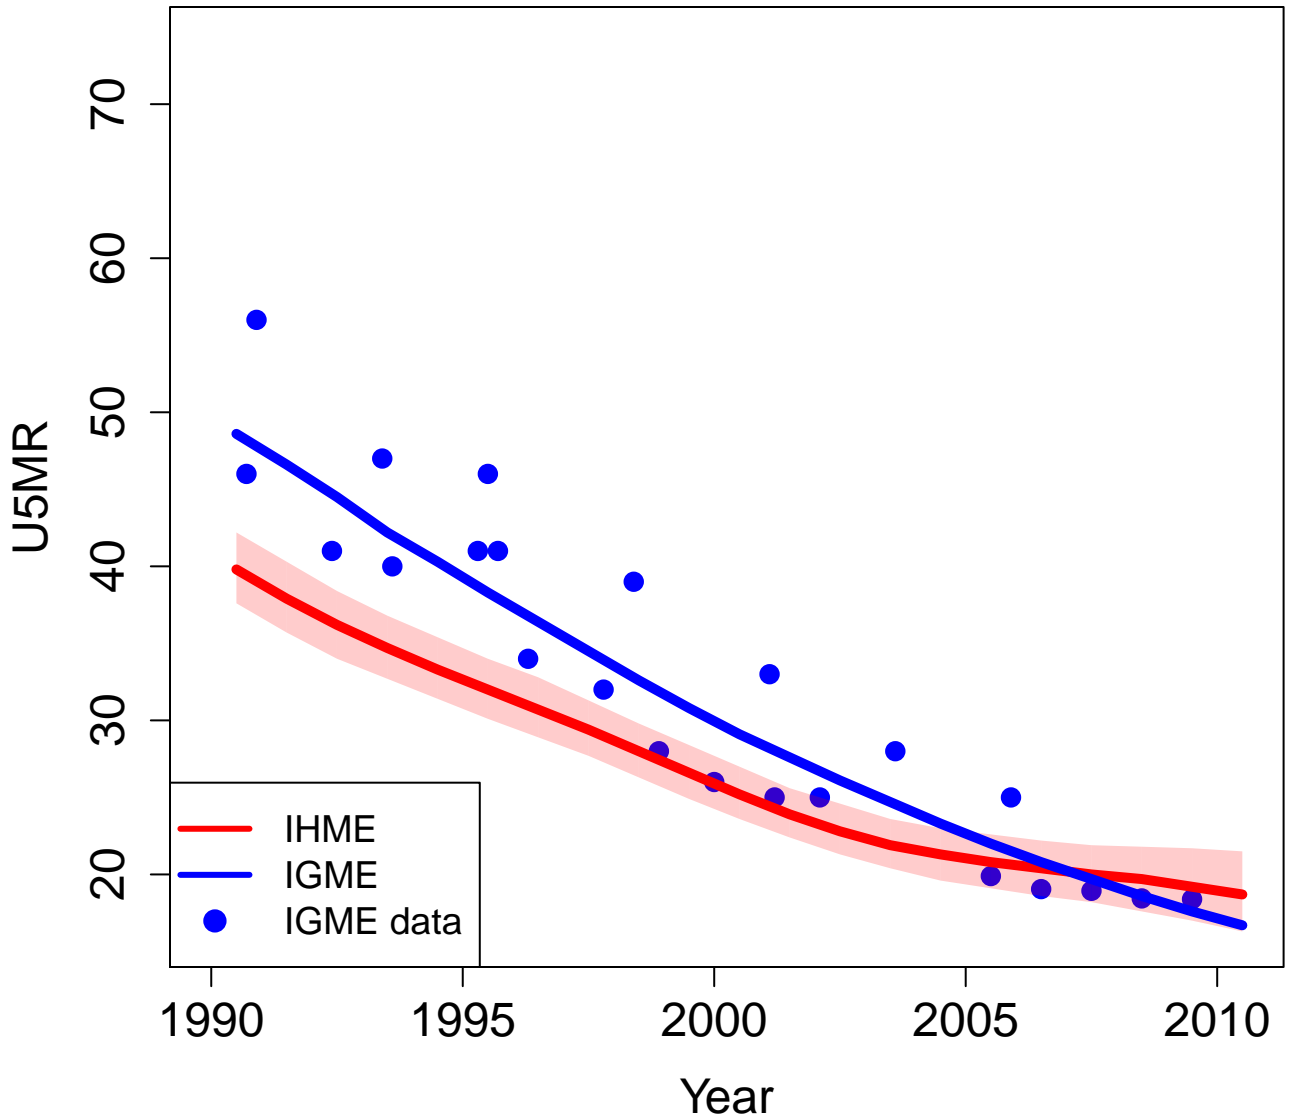

# Micronesia

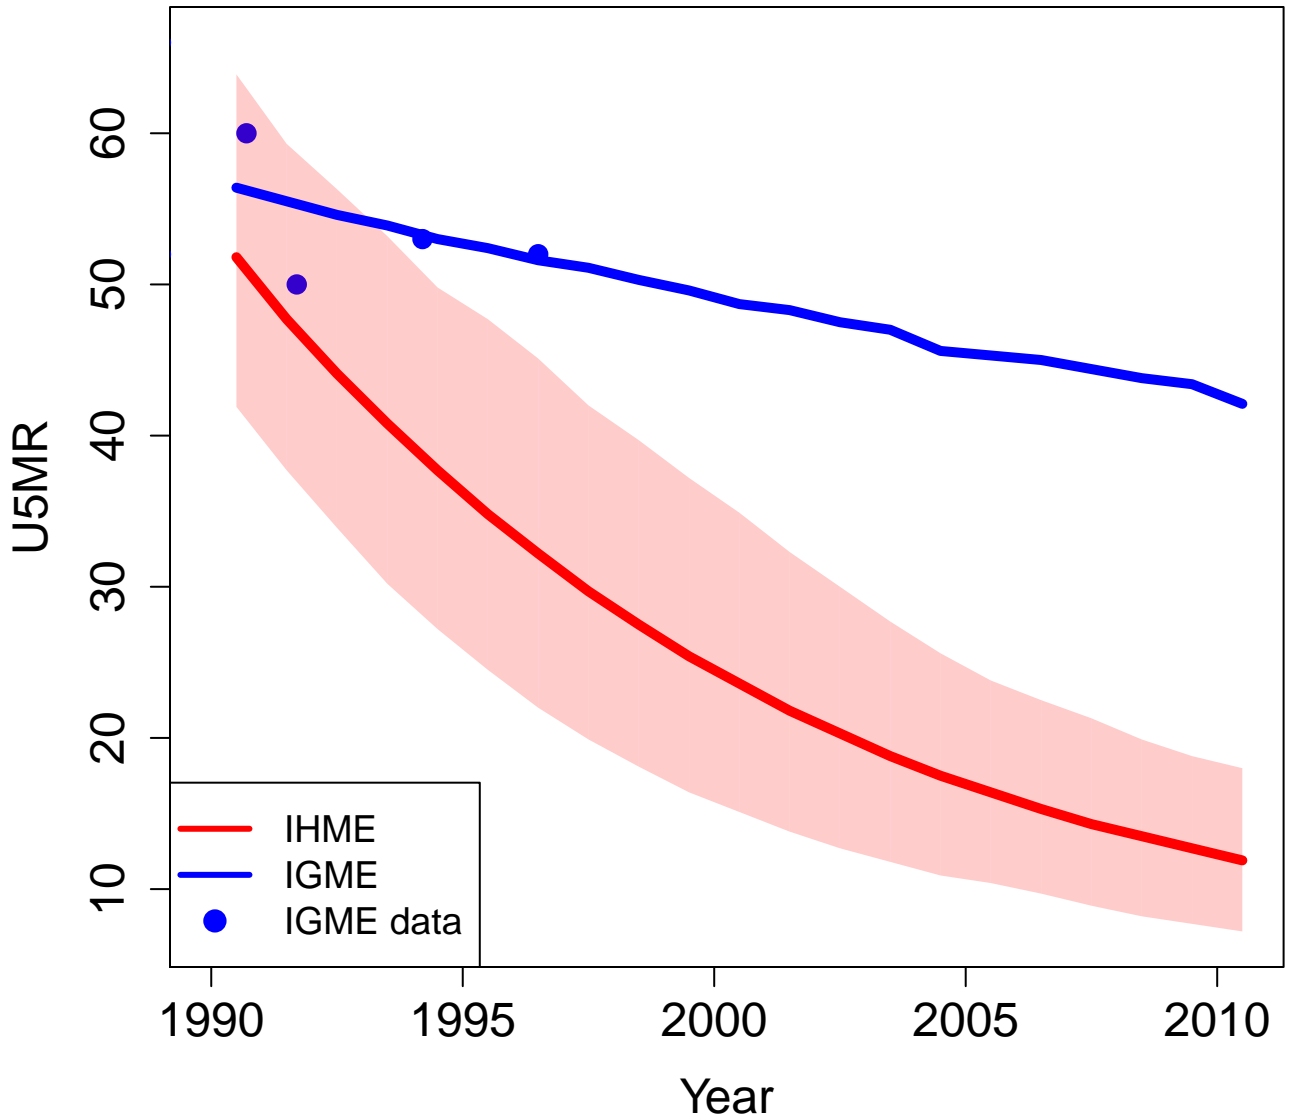

# Mongolia

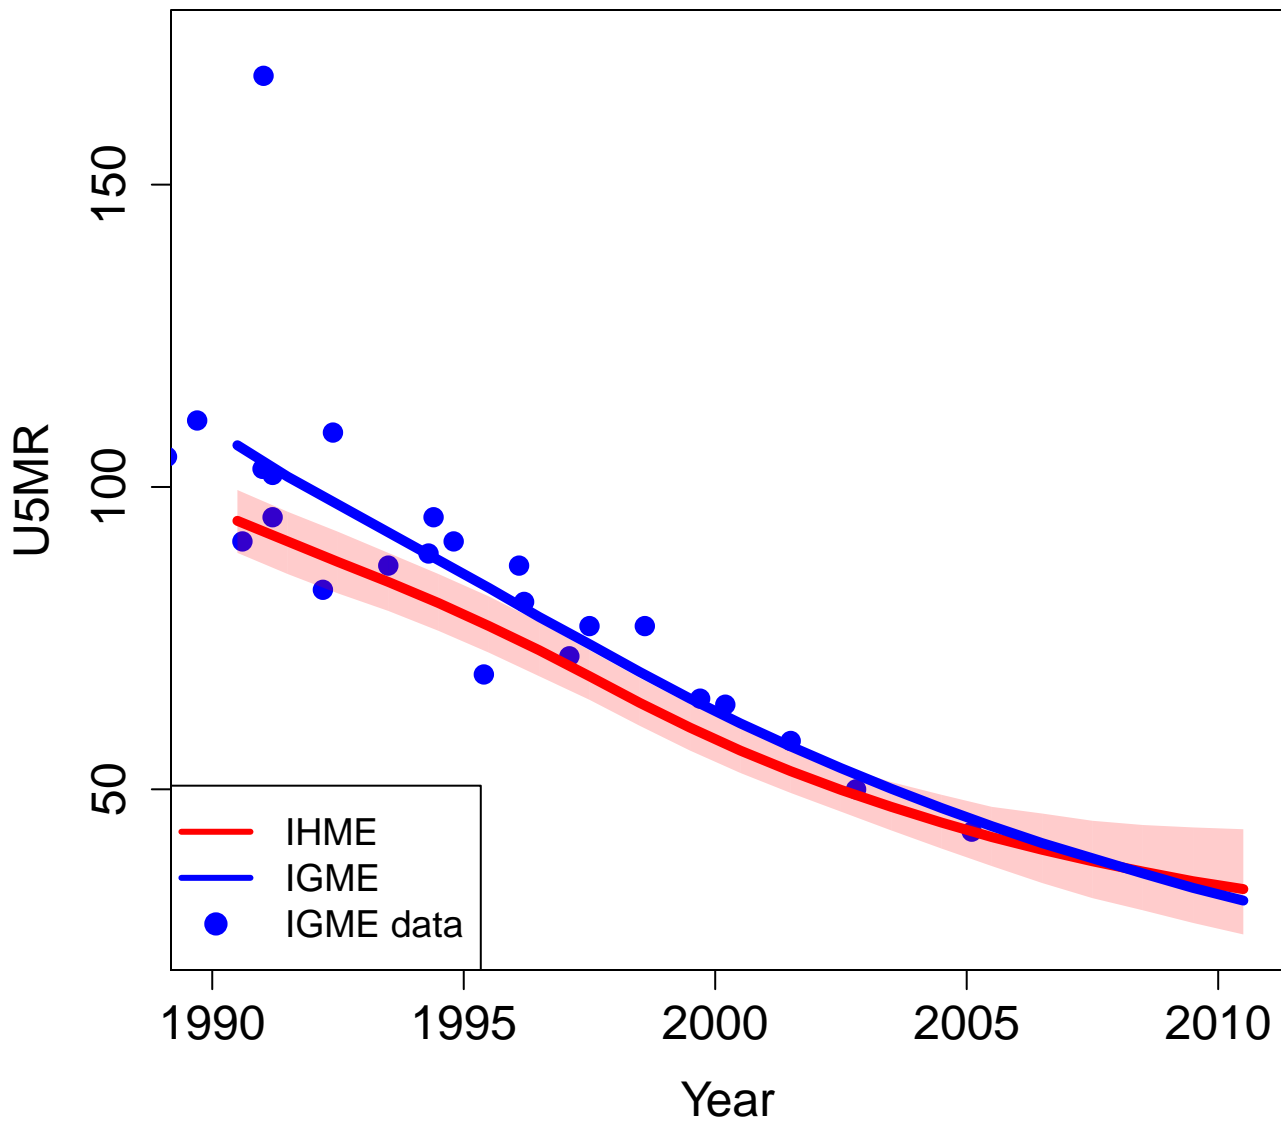

# Montenegro

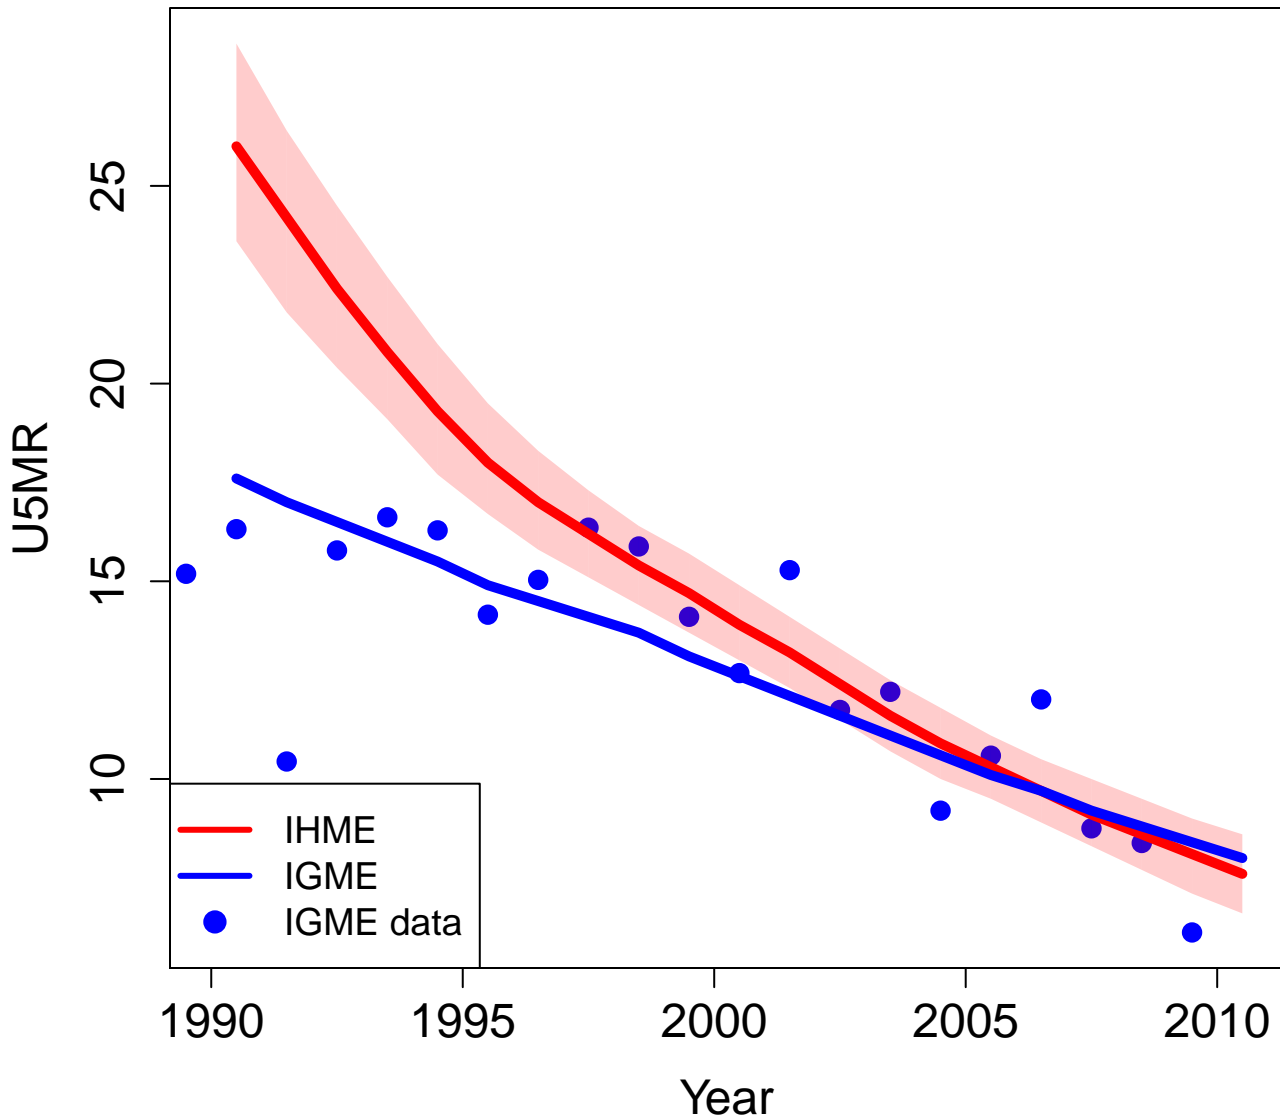



# Morocco

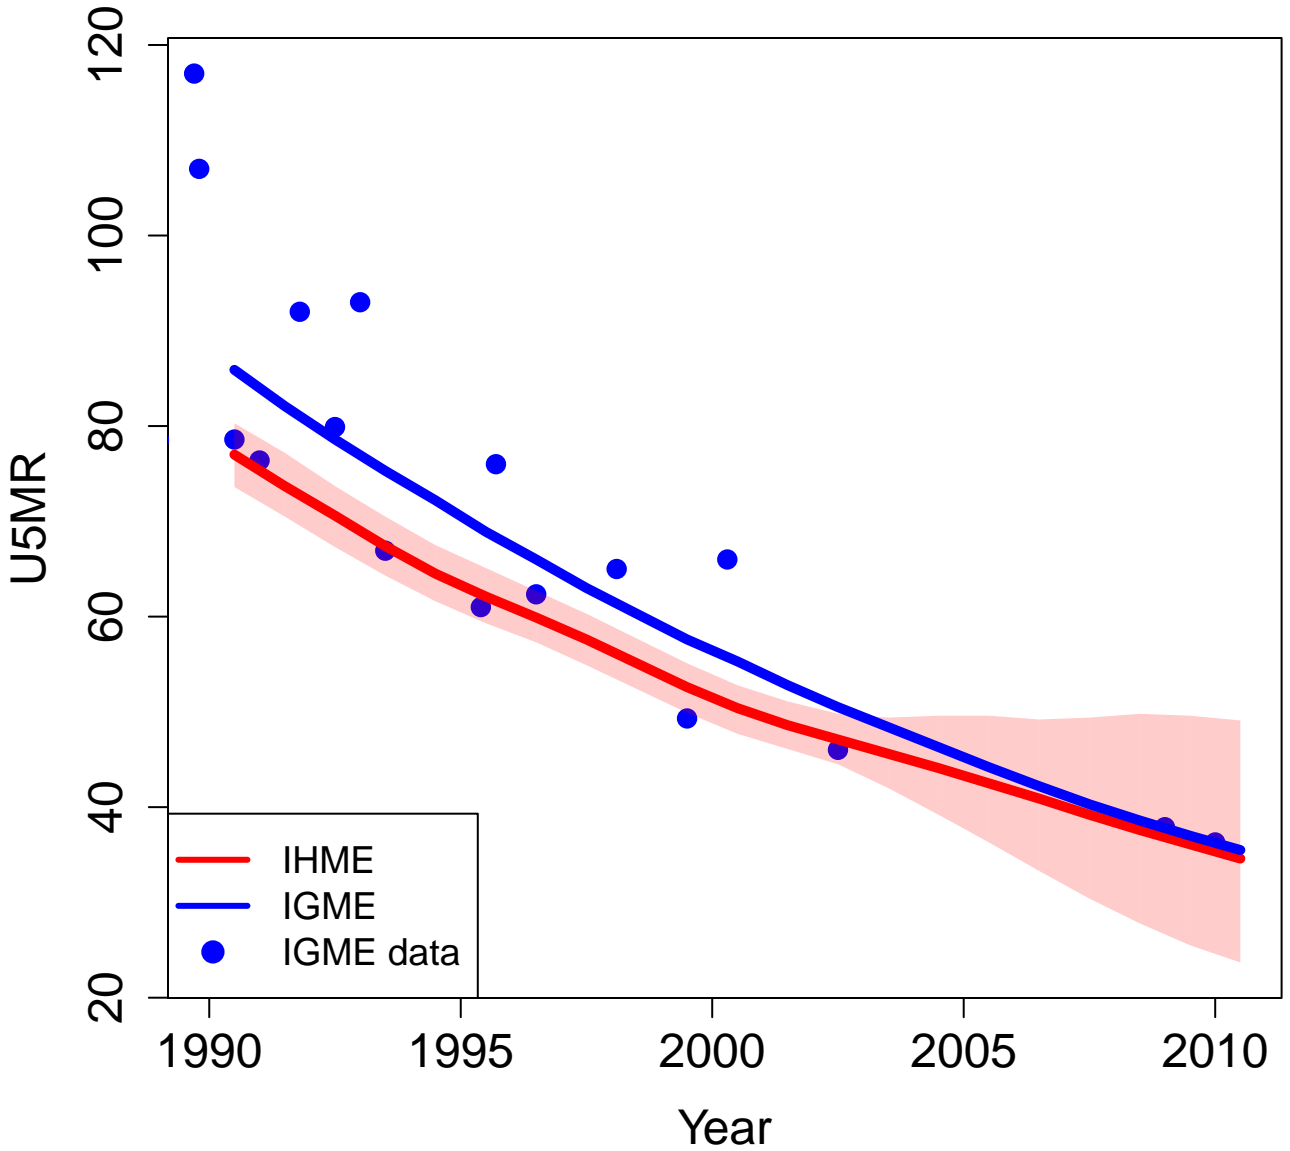

# Mozambique

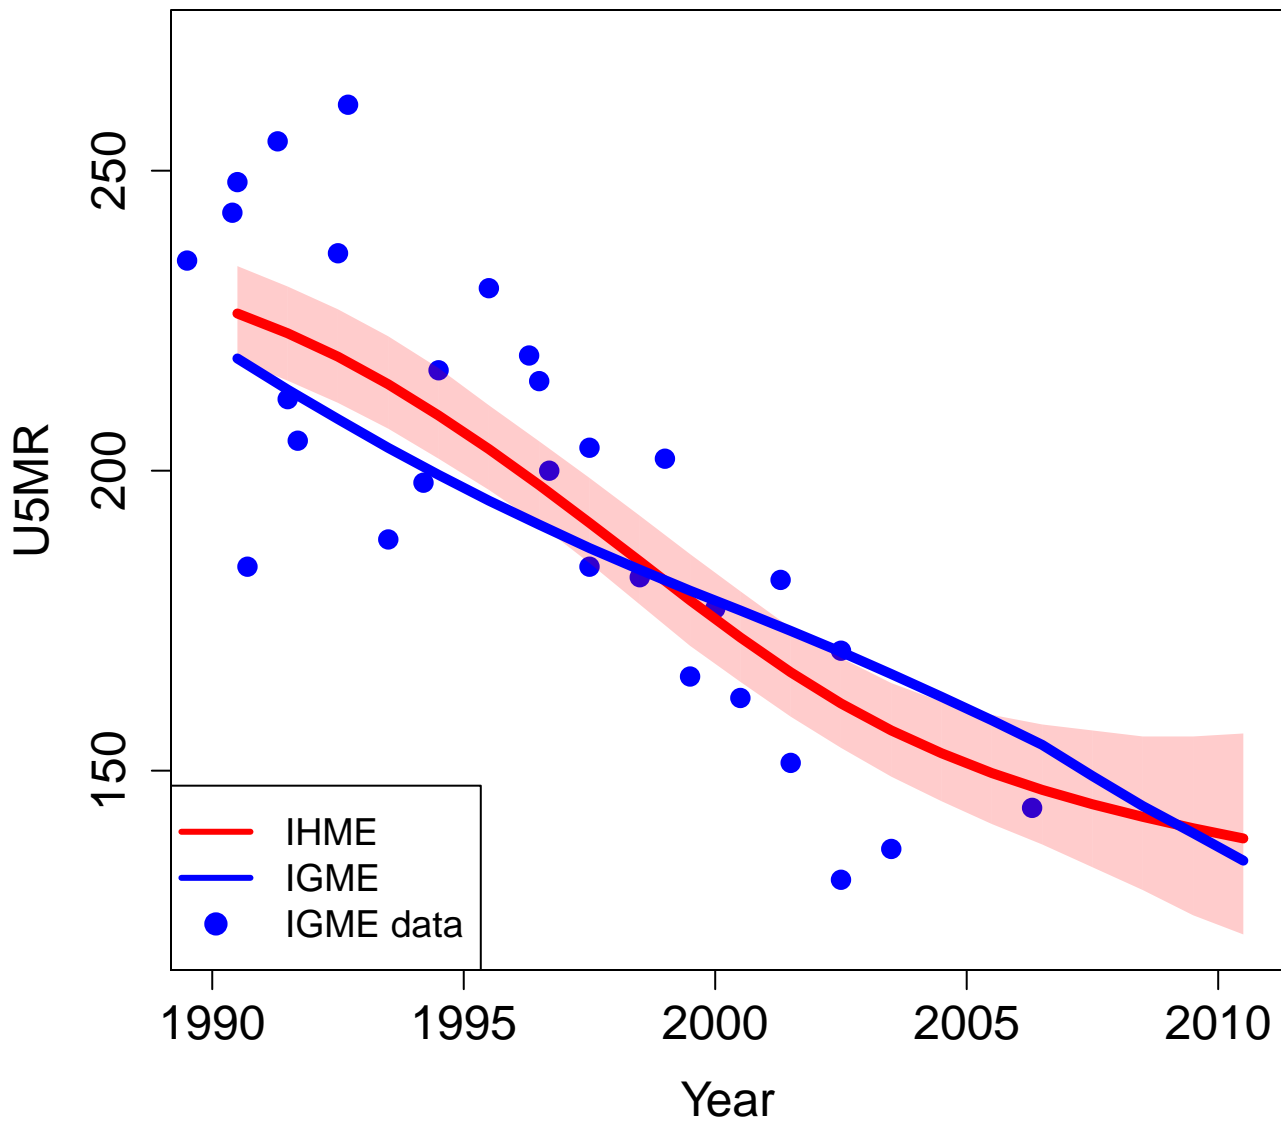

# Myanmar

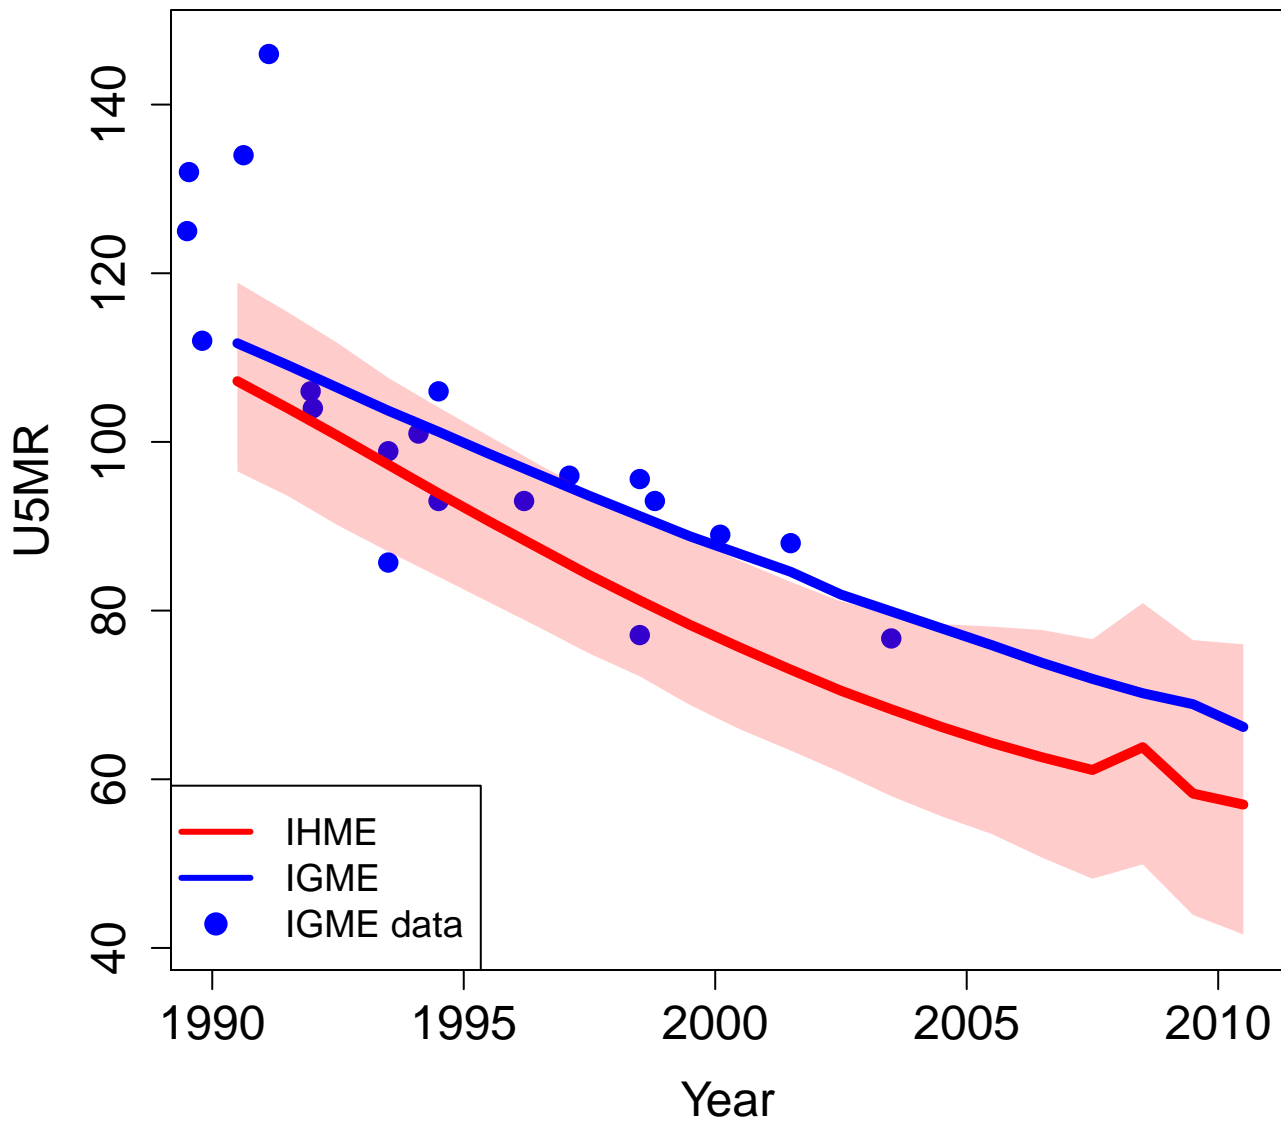

# Namibia

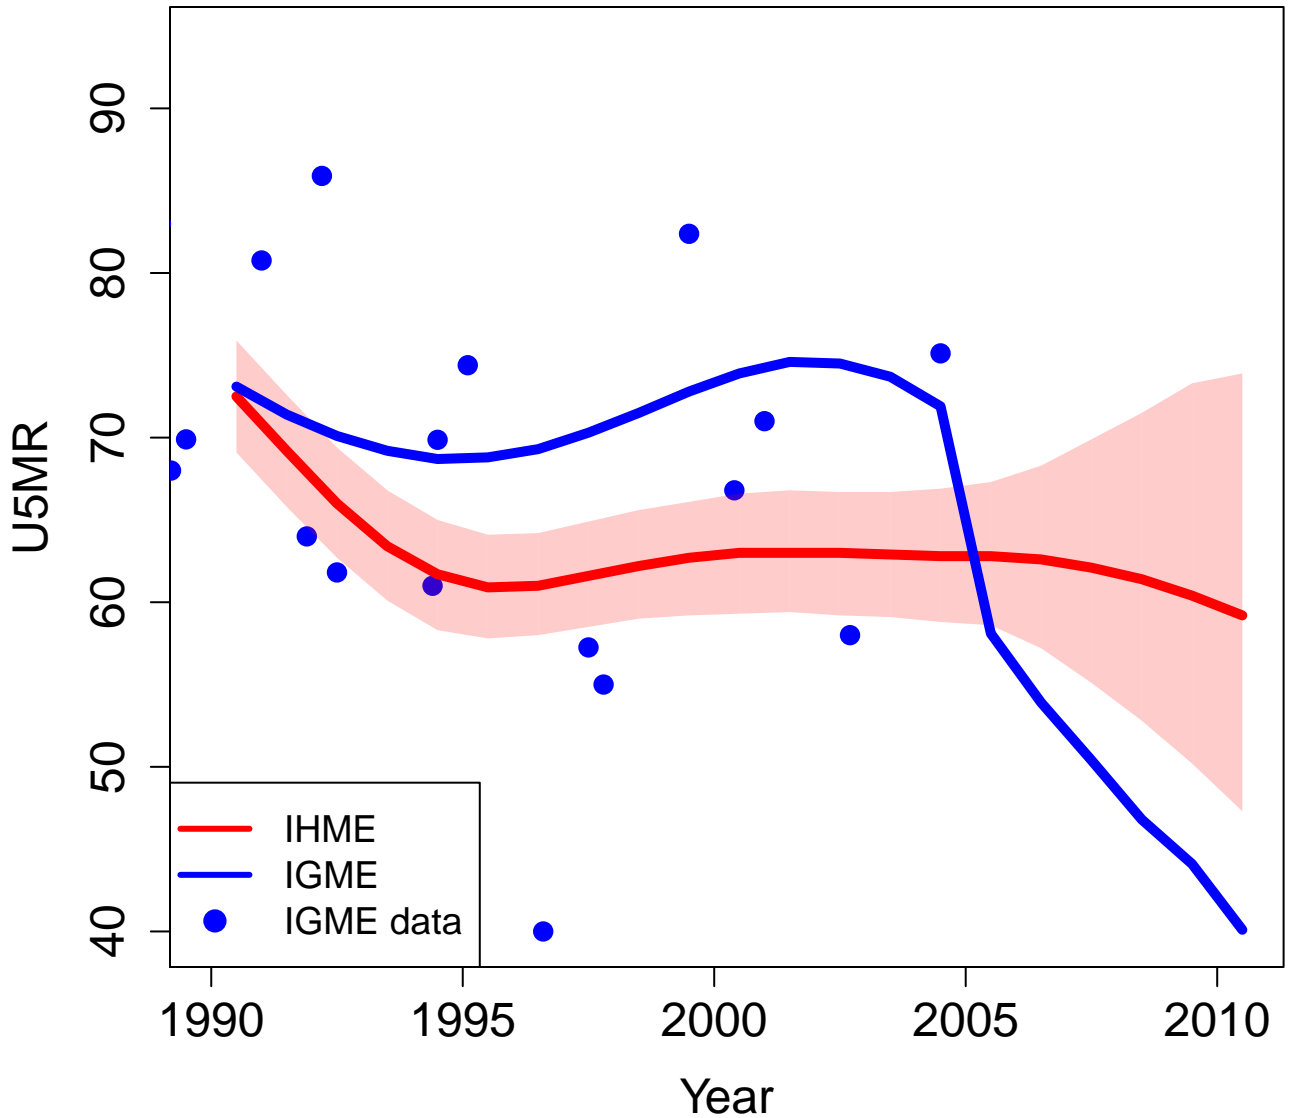

# Nepal

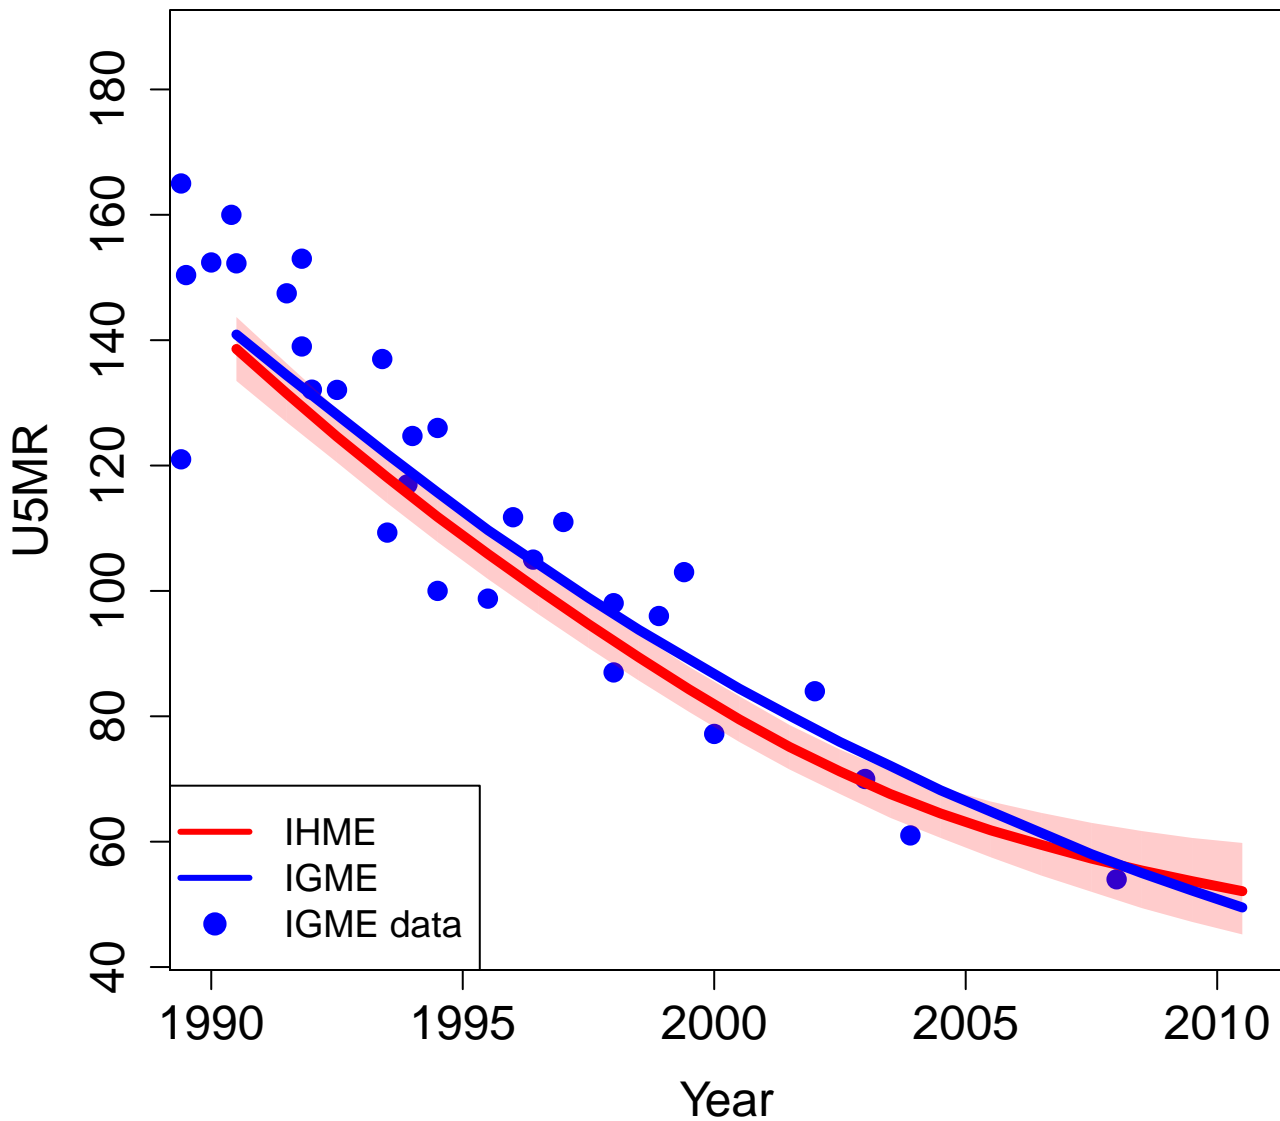

# Netherlands

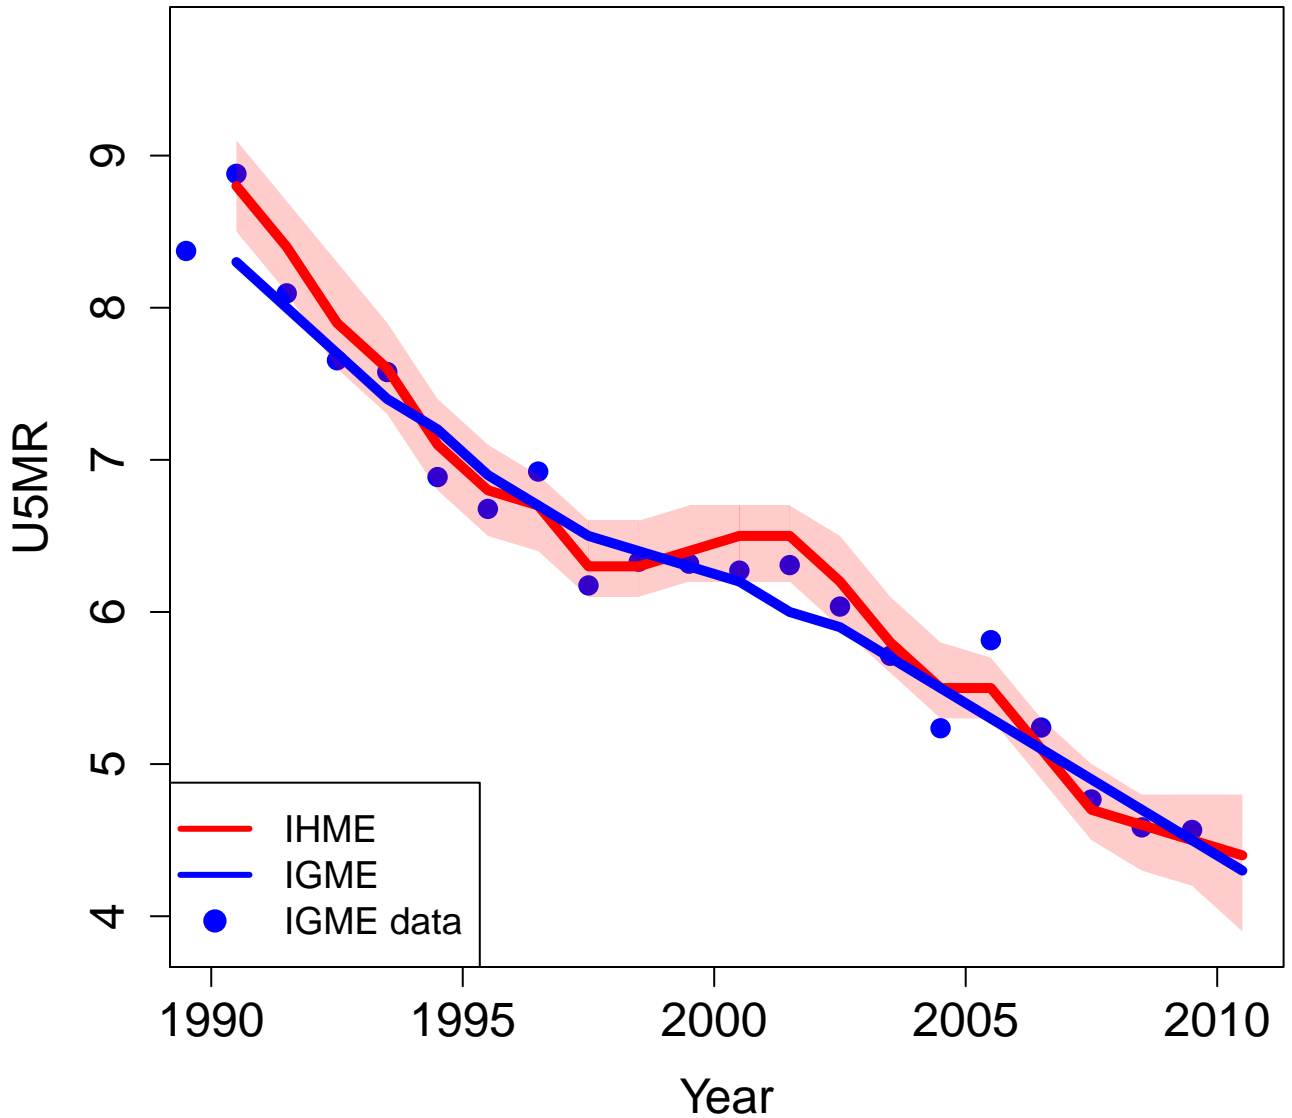

# New Zealand

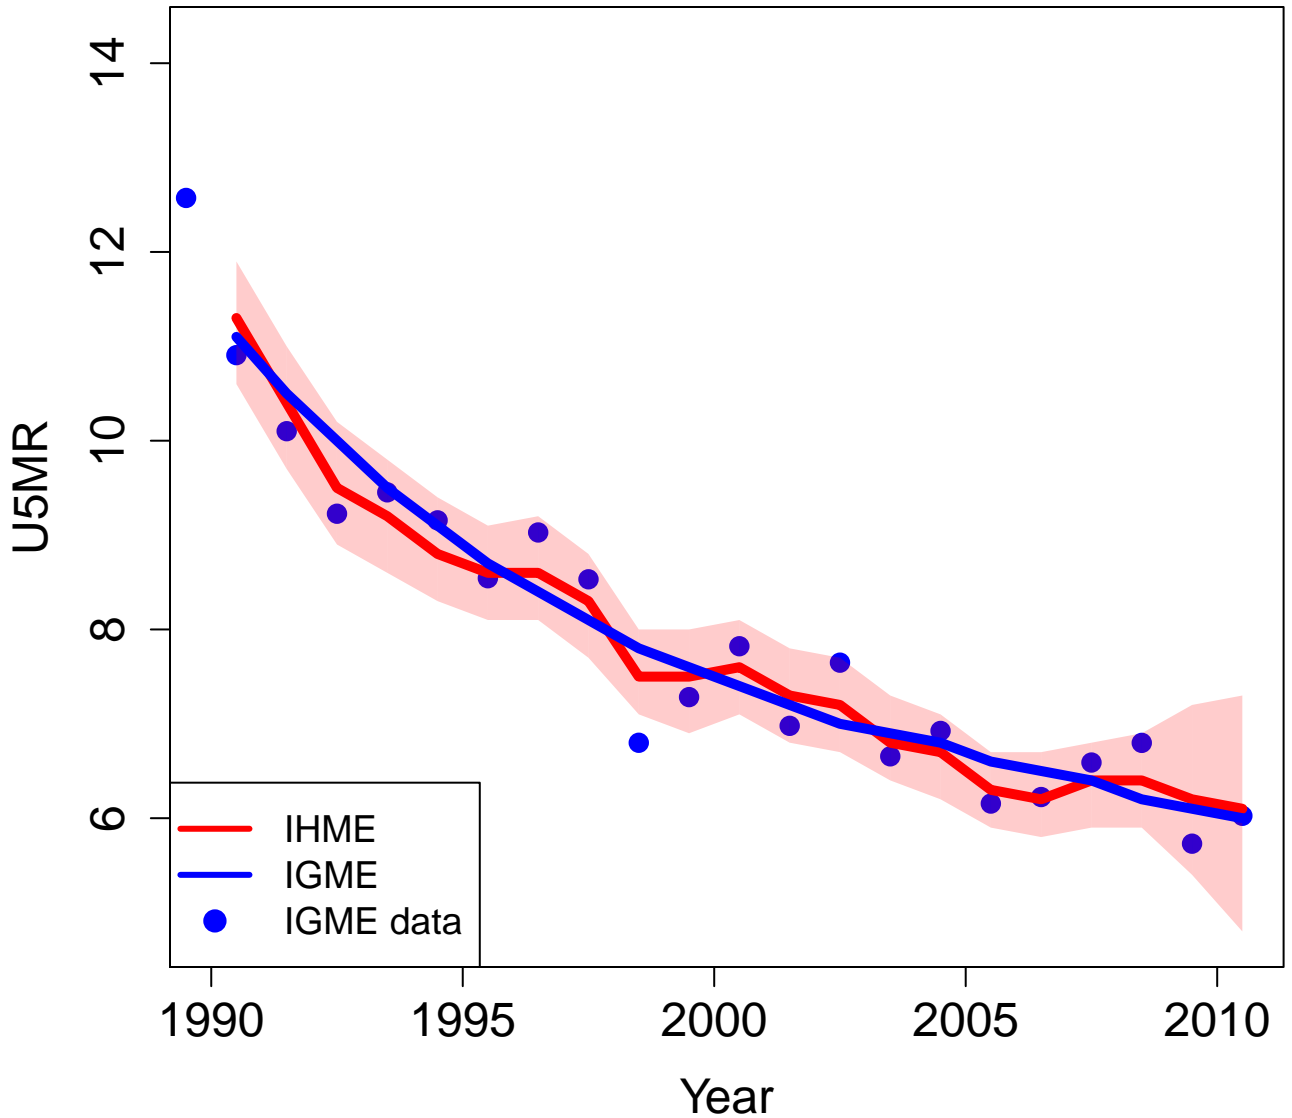

# Nicaragua

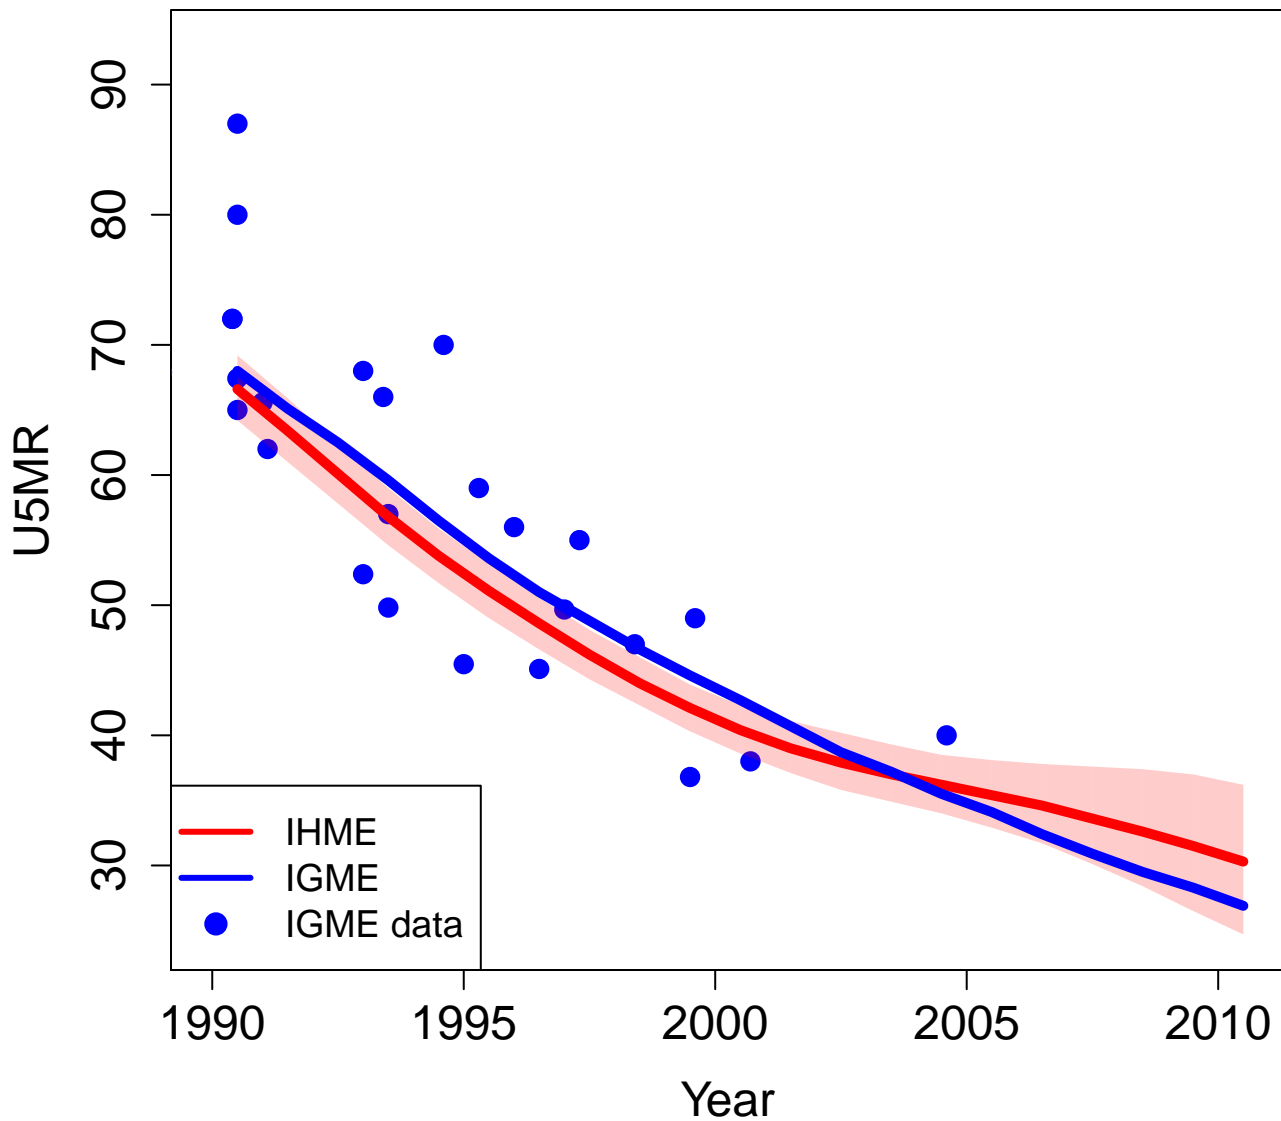



# Niger

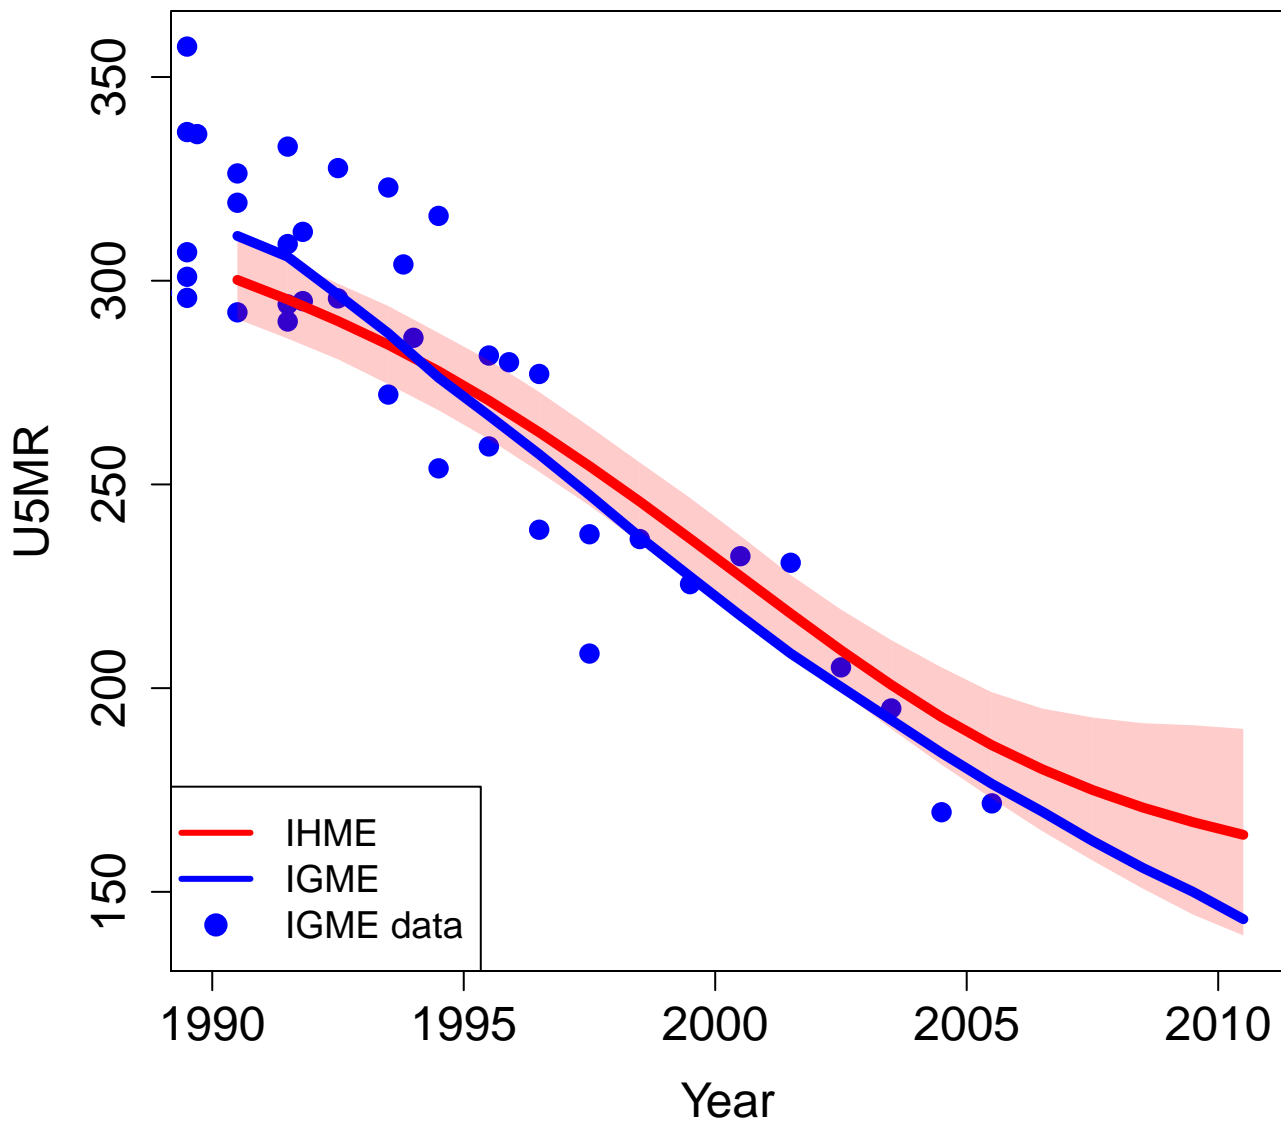

# Nigeria

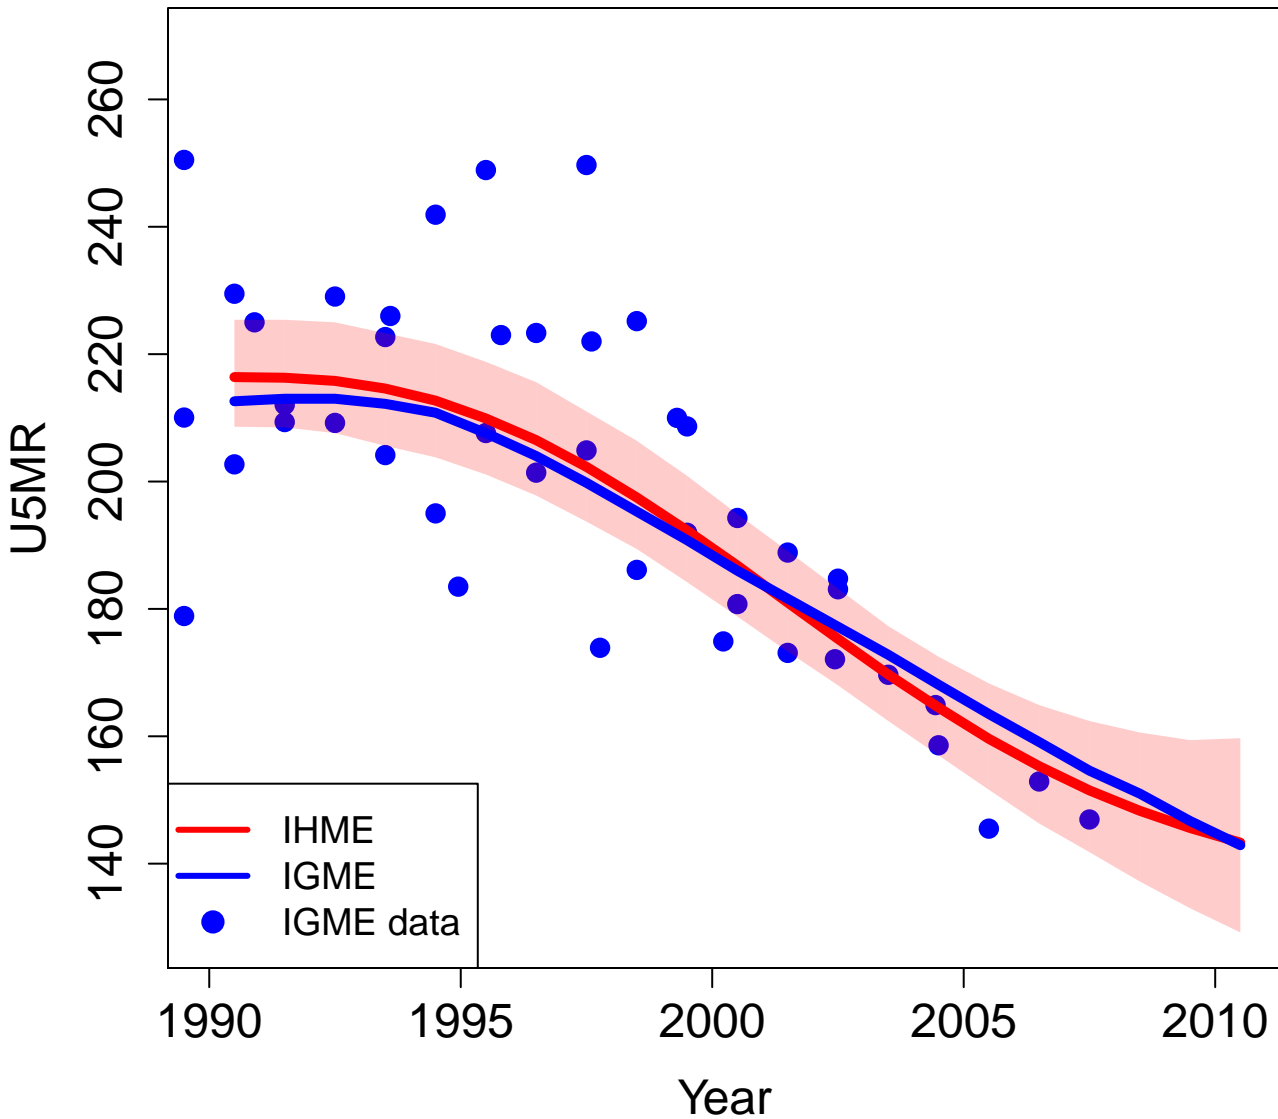

# Norway

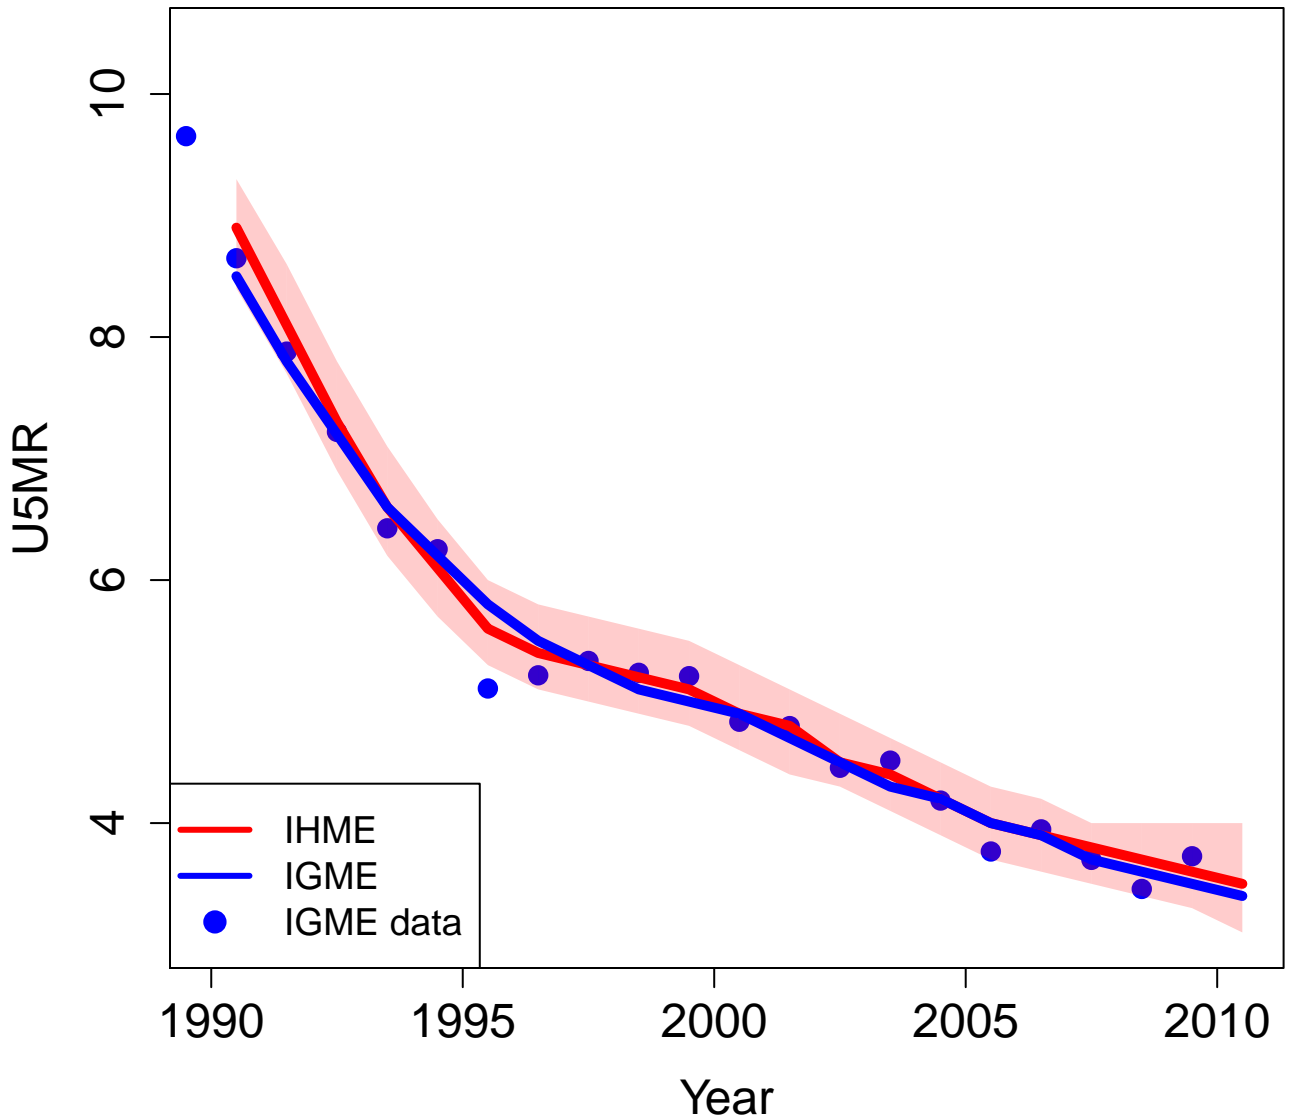

# Occ. Palestinian Terr.

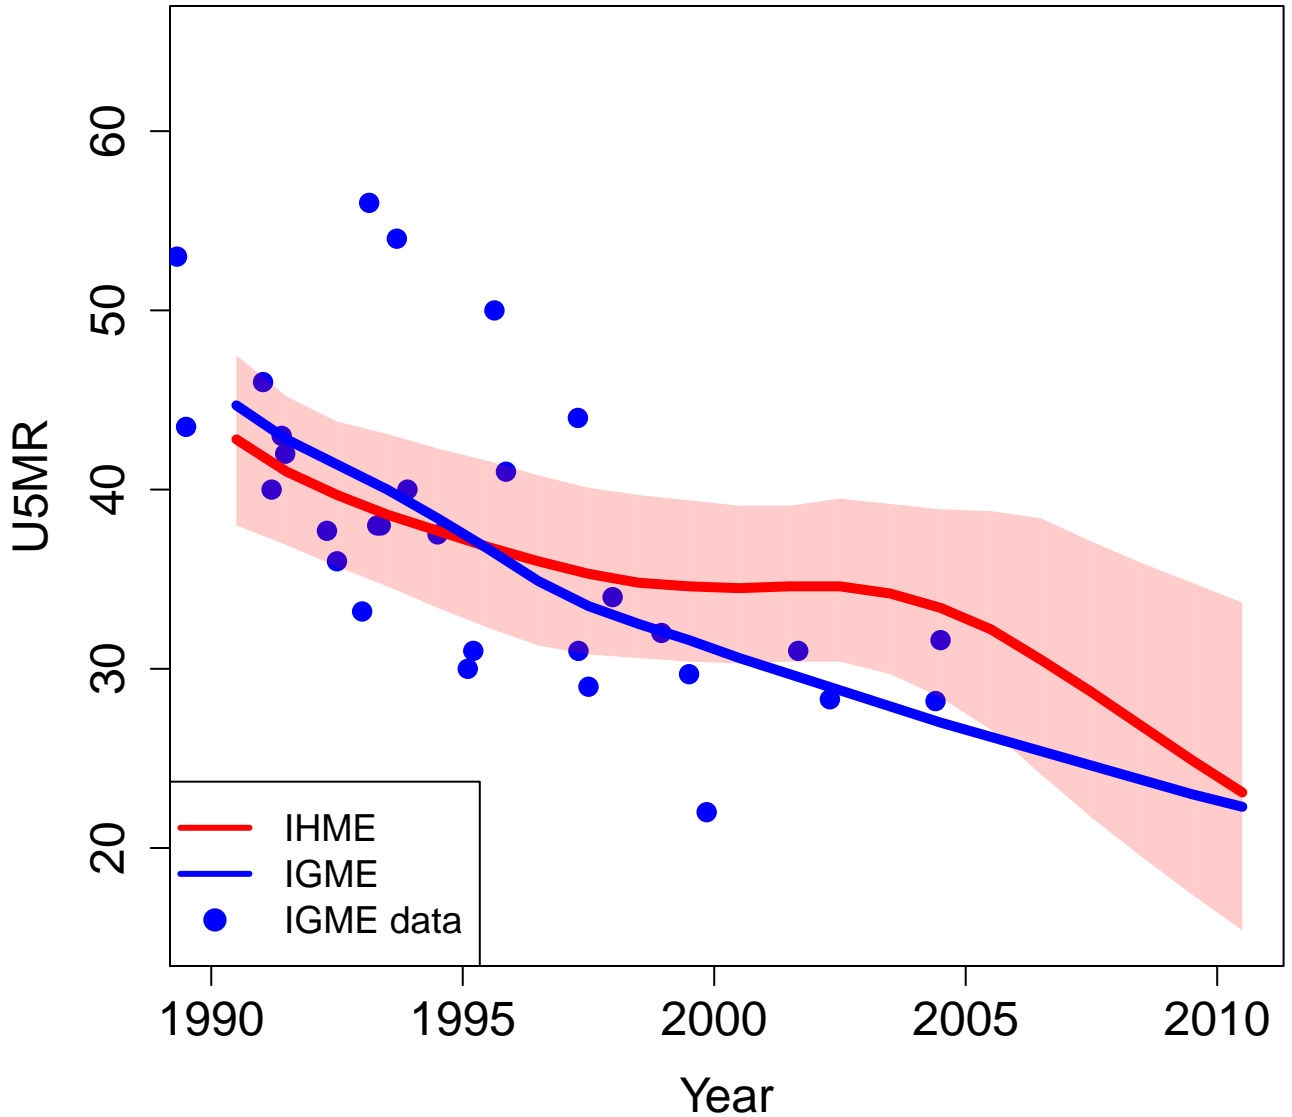

# Oman

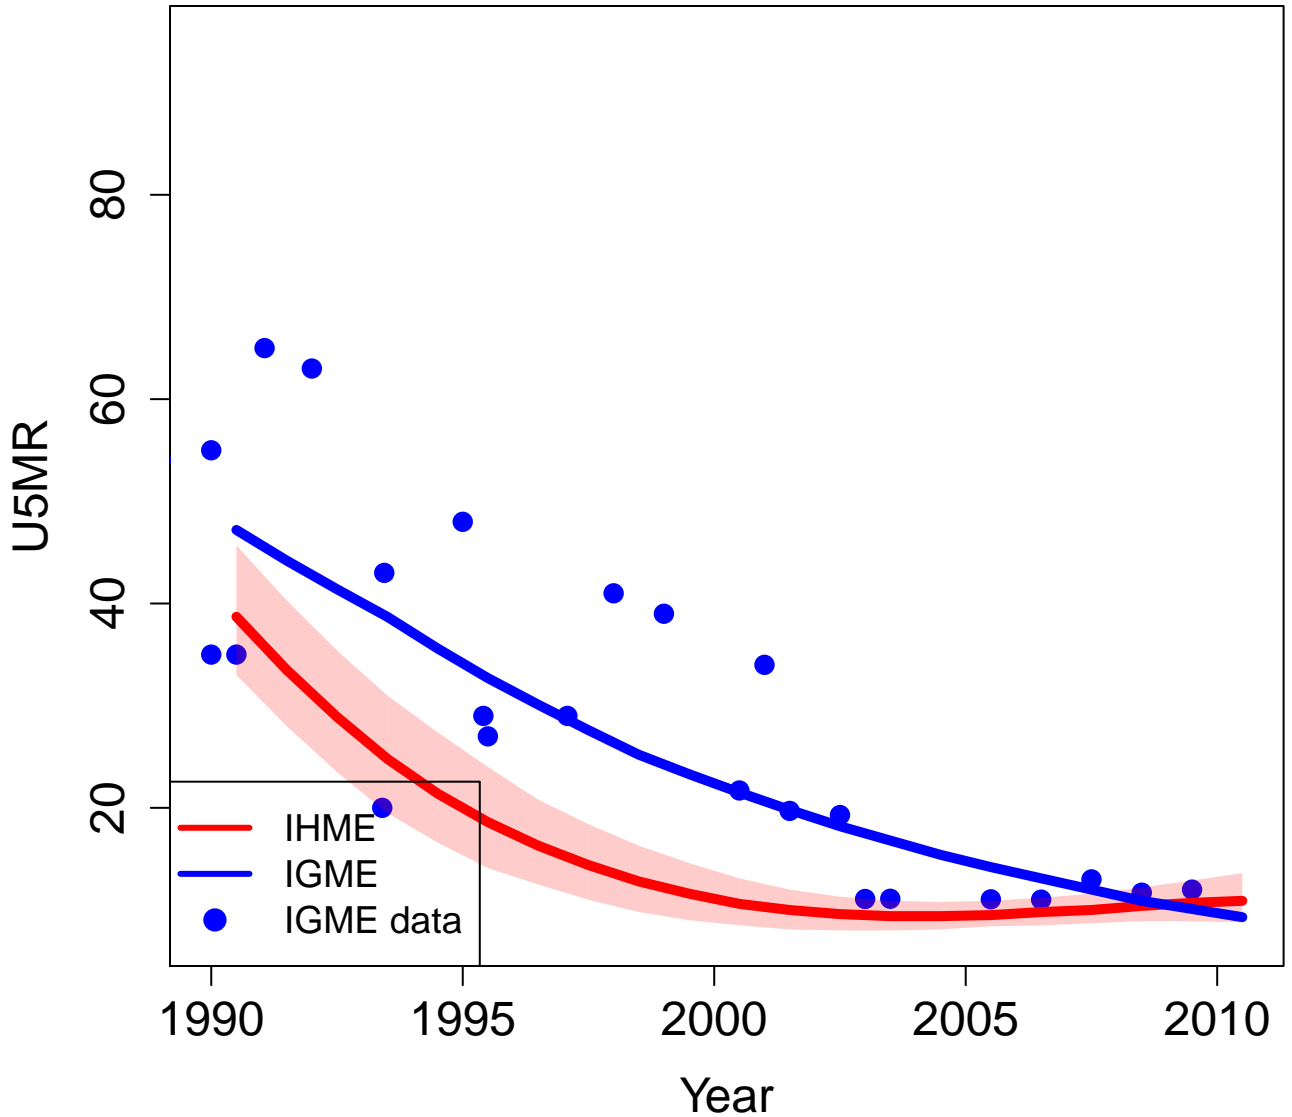

# Pakistan

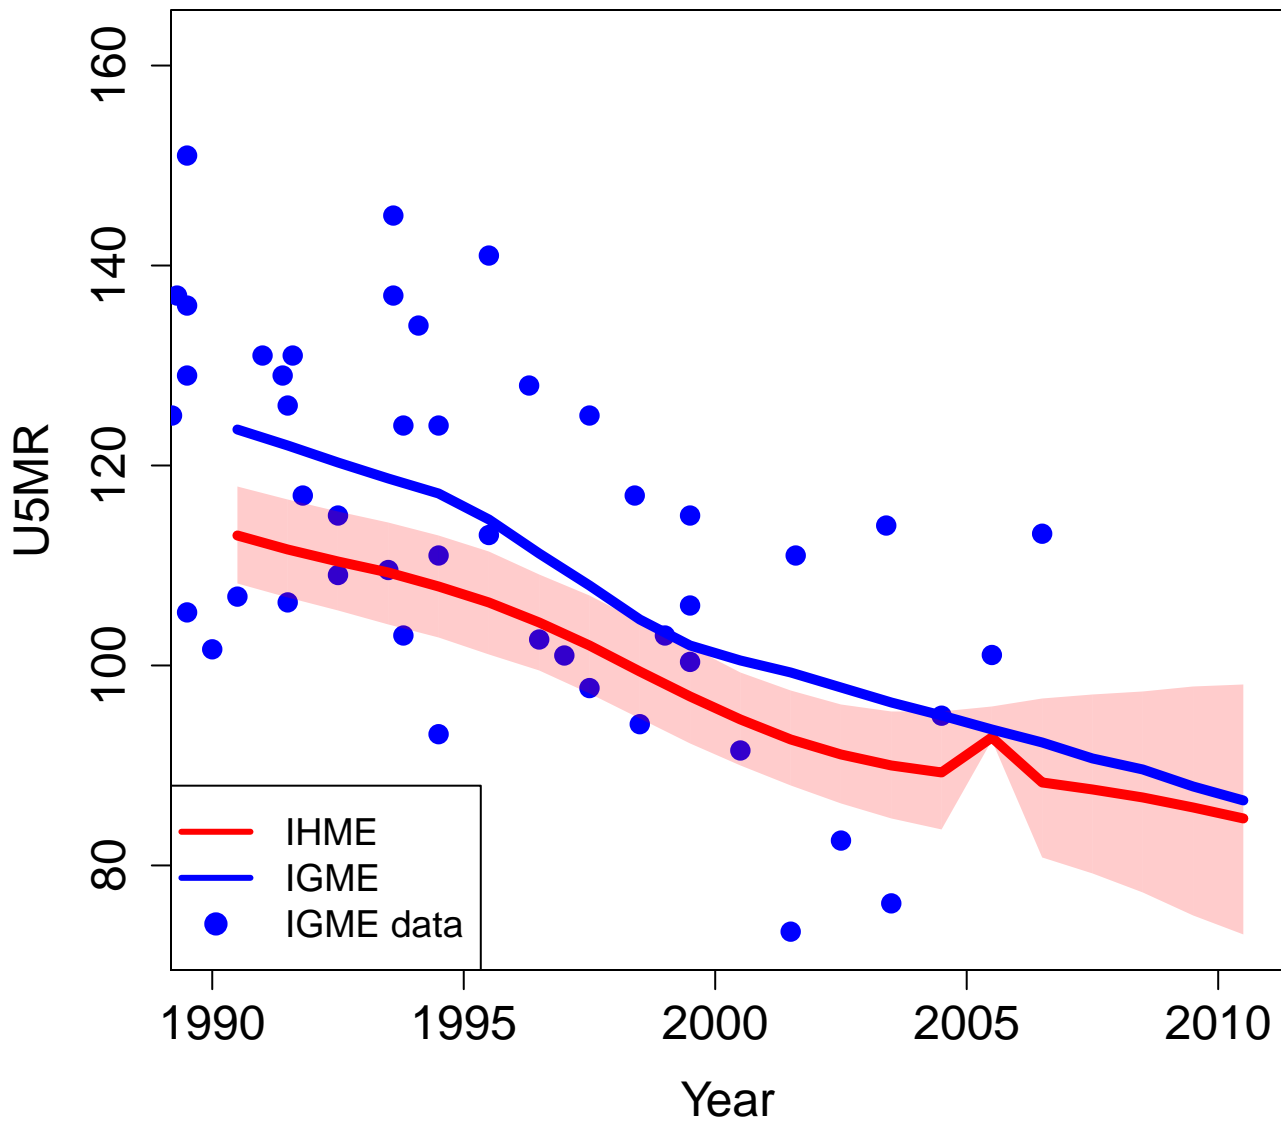

# Panama

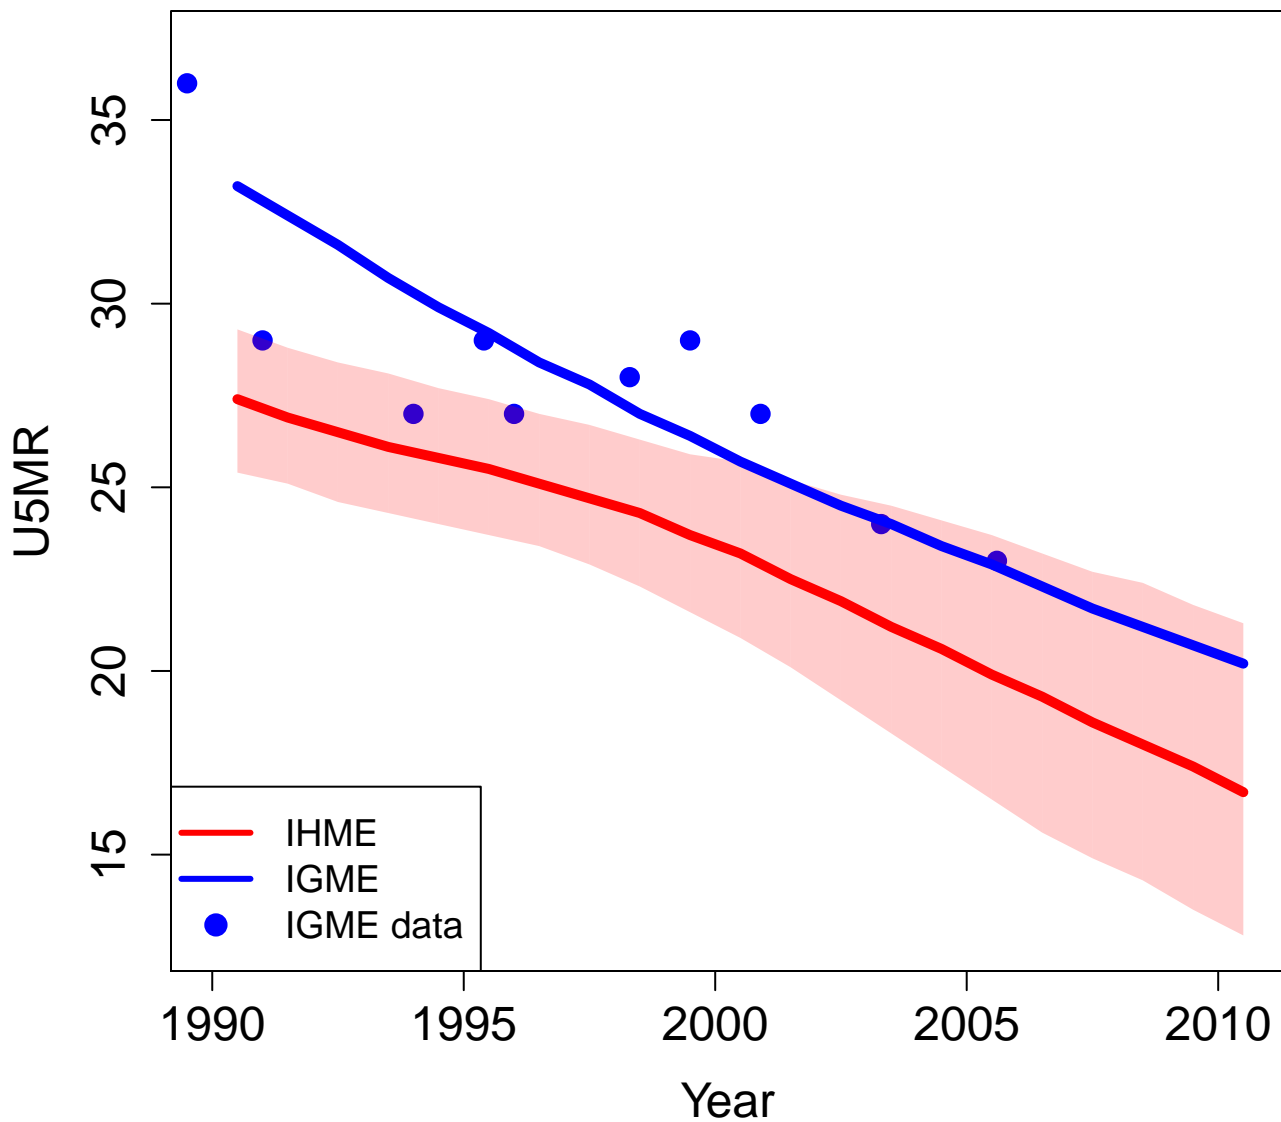

# Papua New Guinea

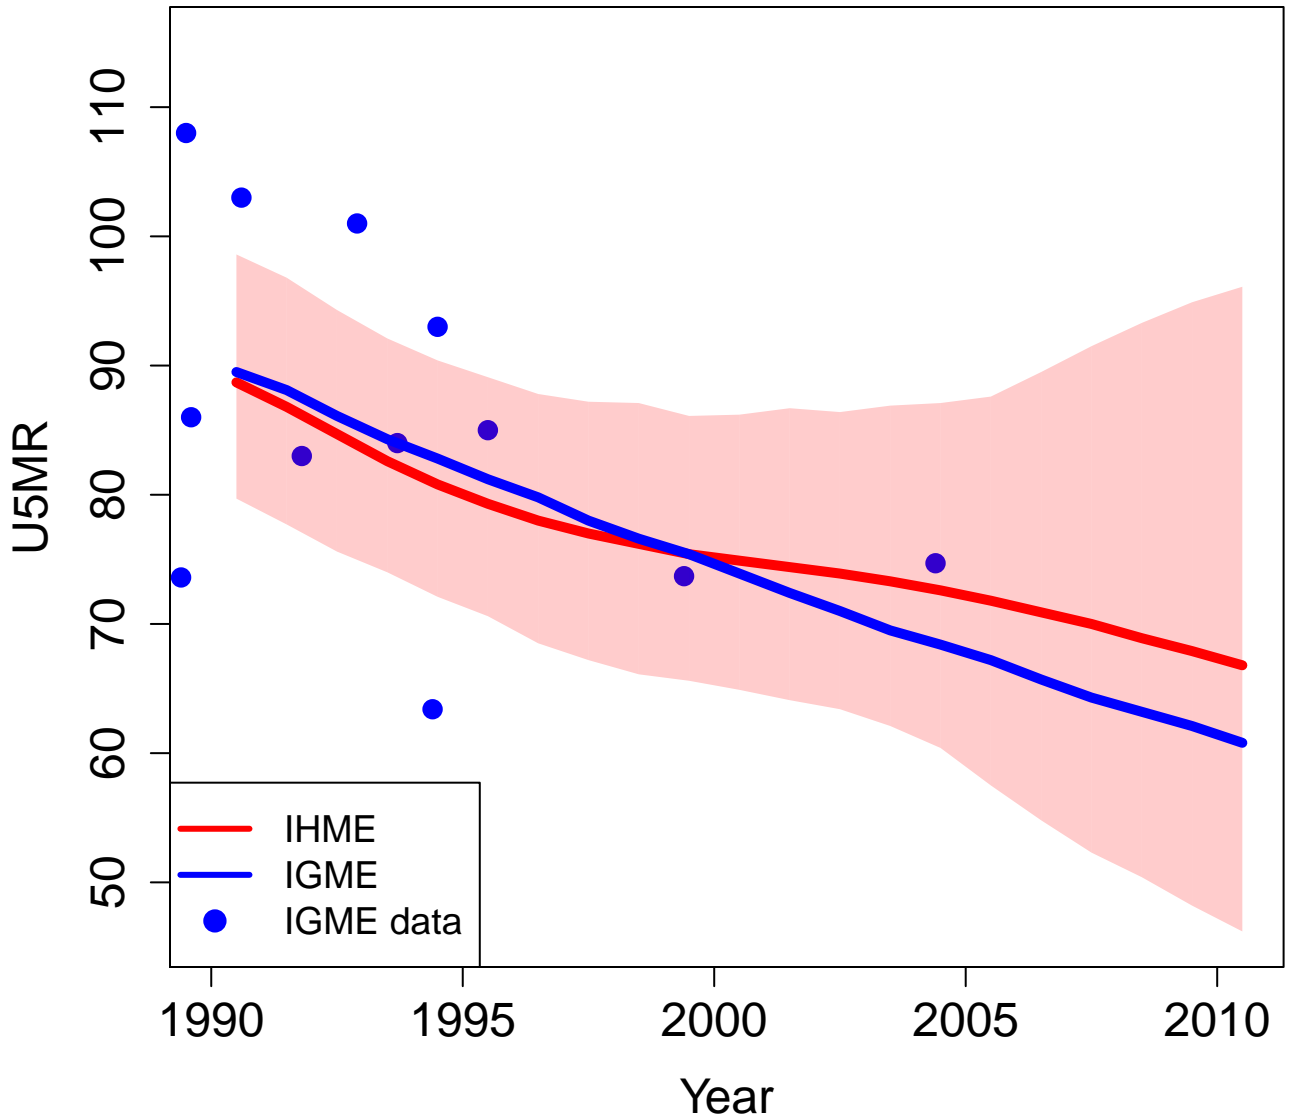



# Paraguay

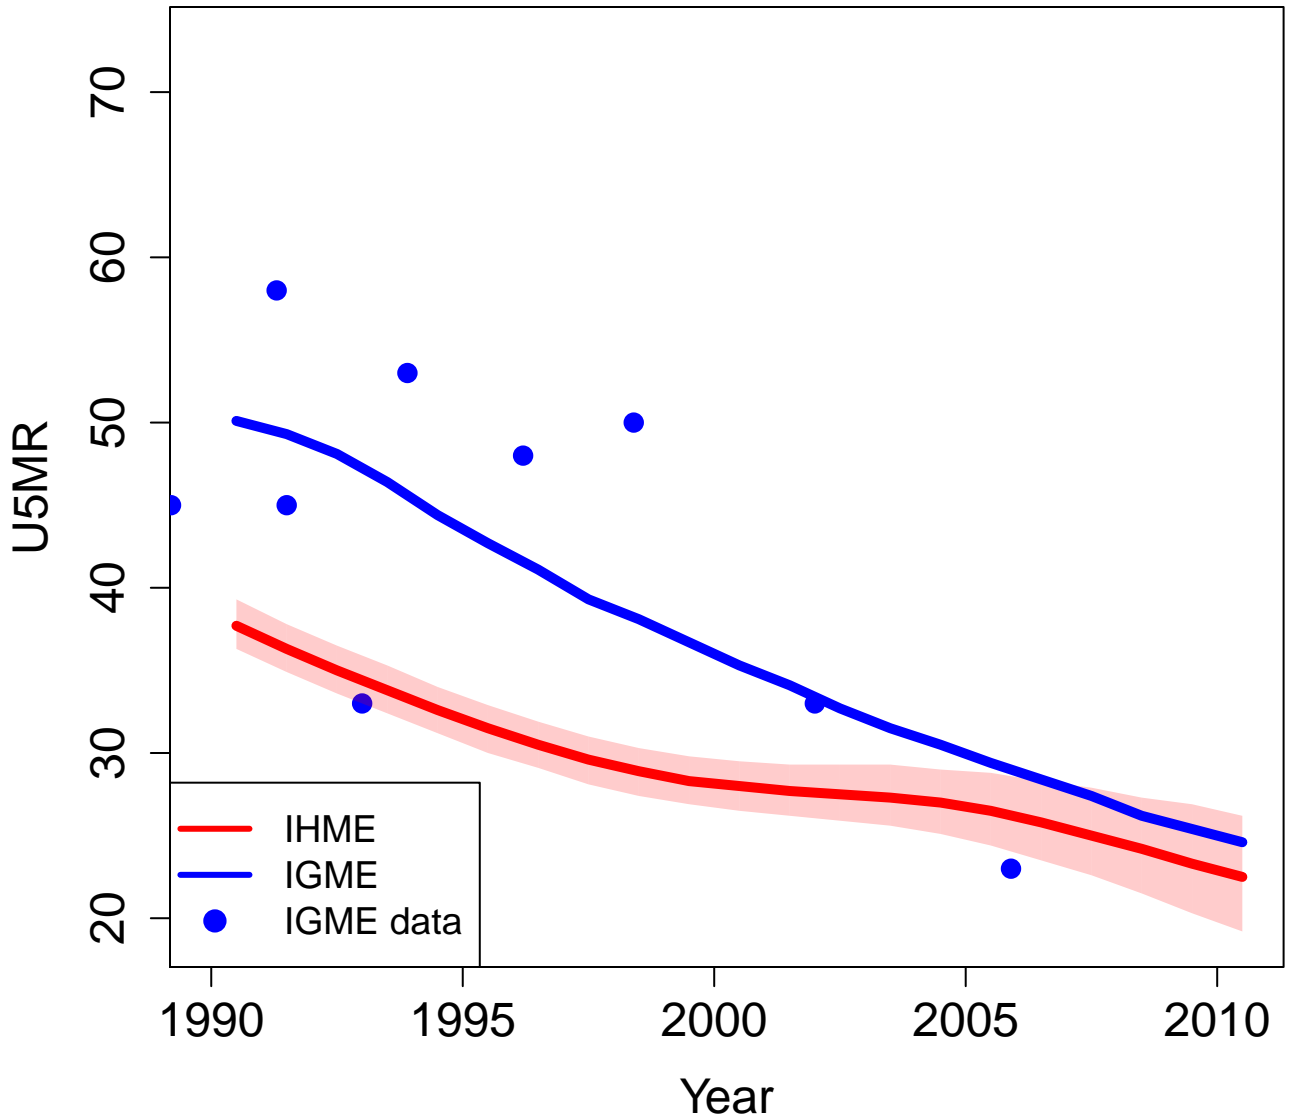

# Peru

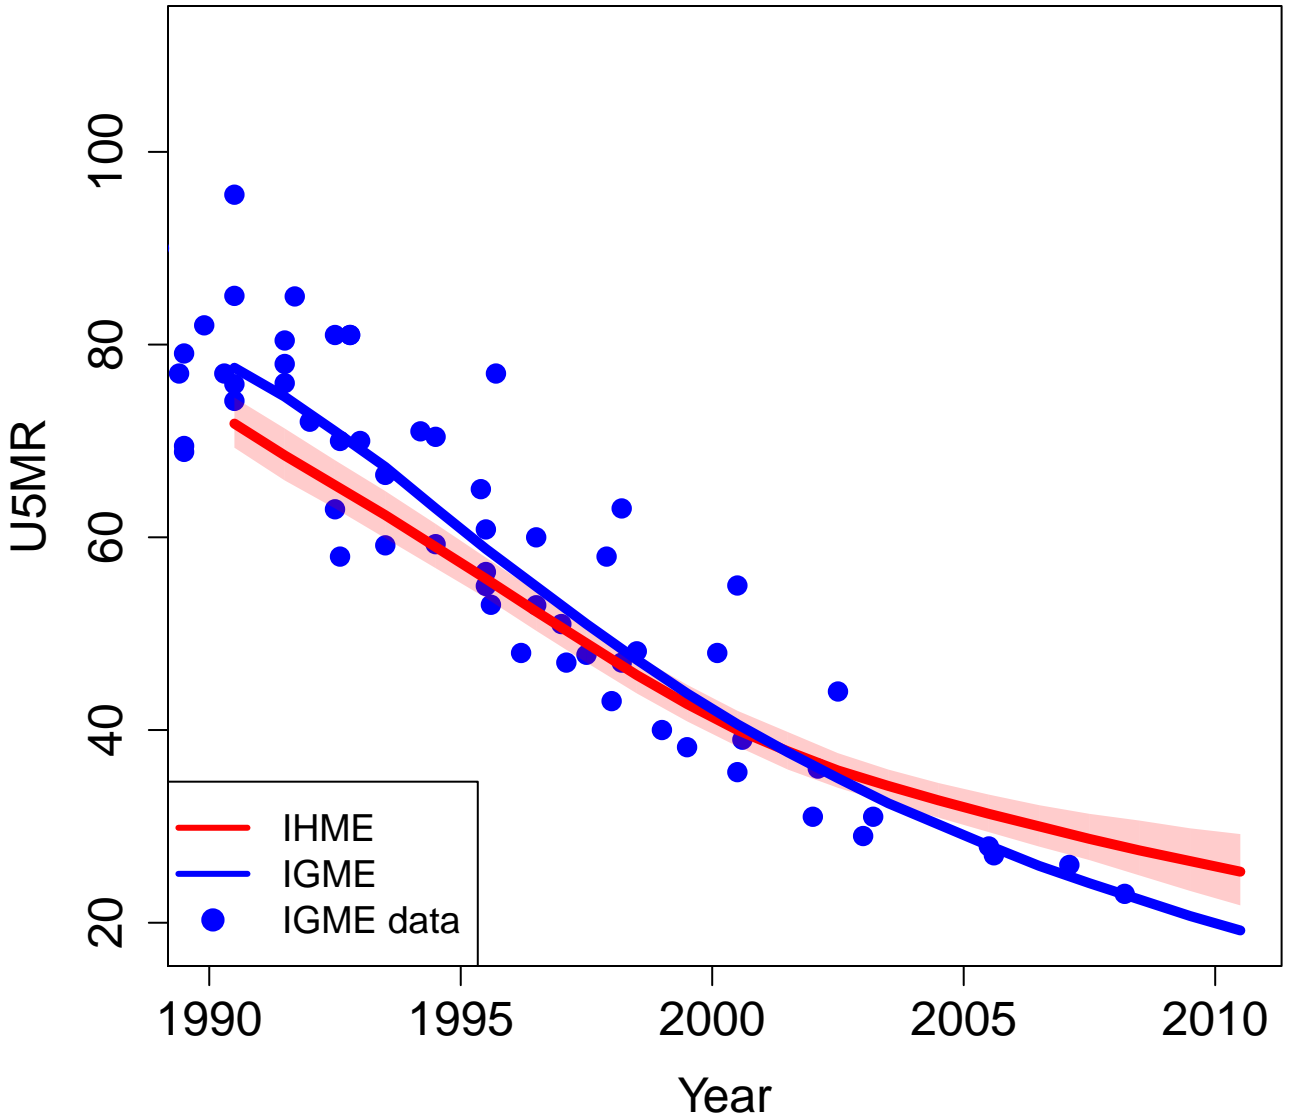

# Philippines

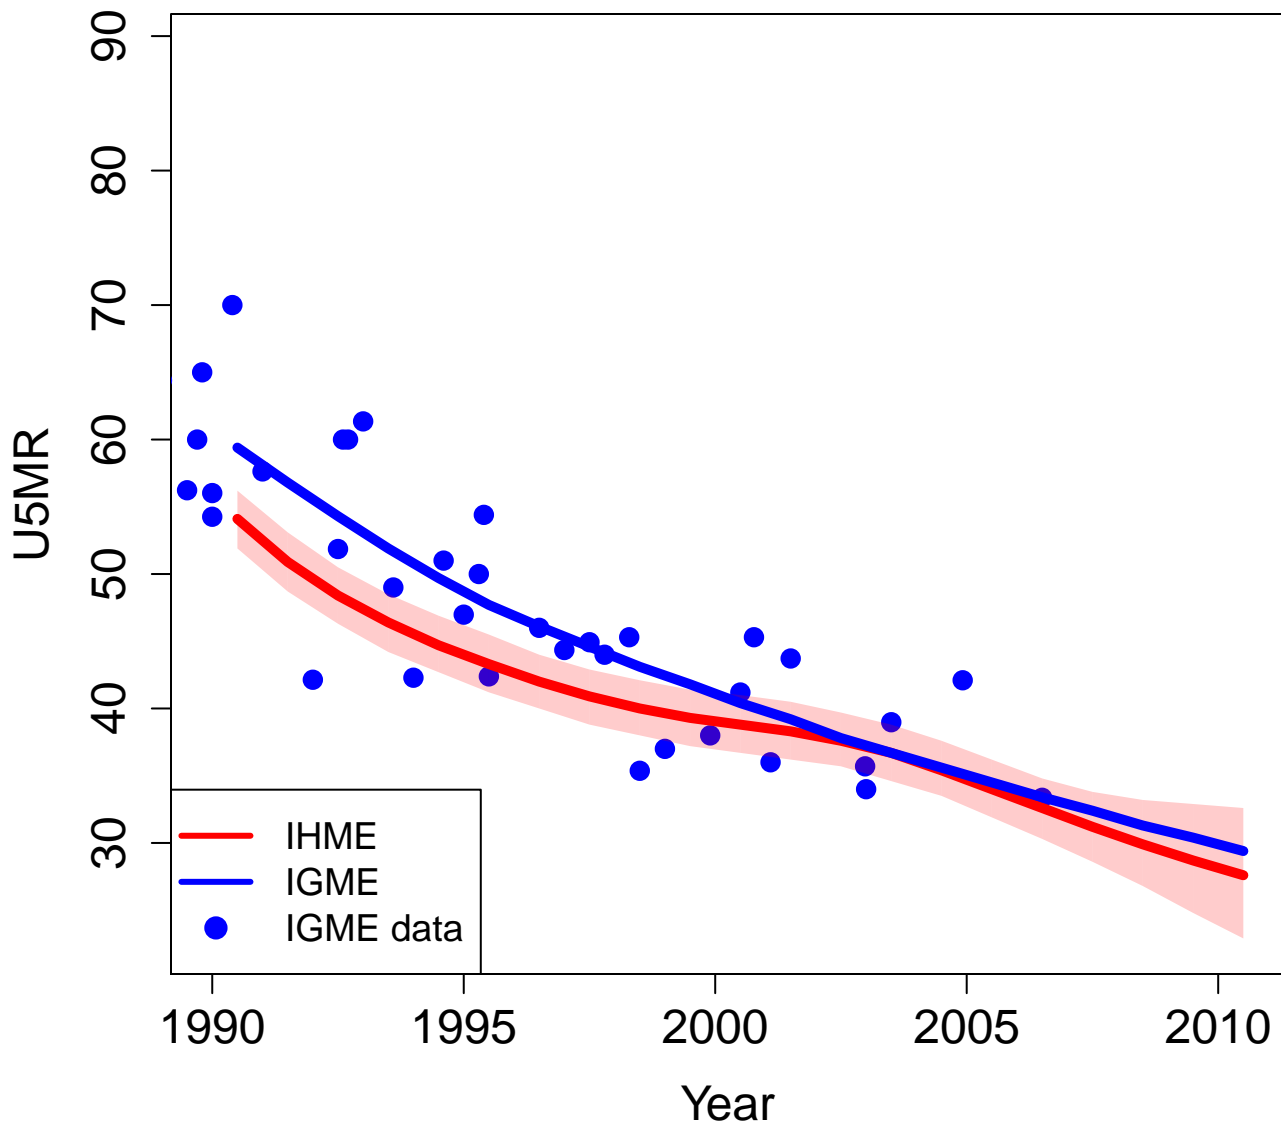

# Poland

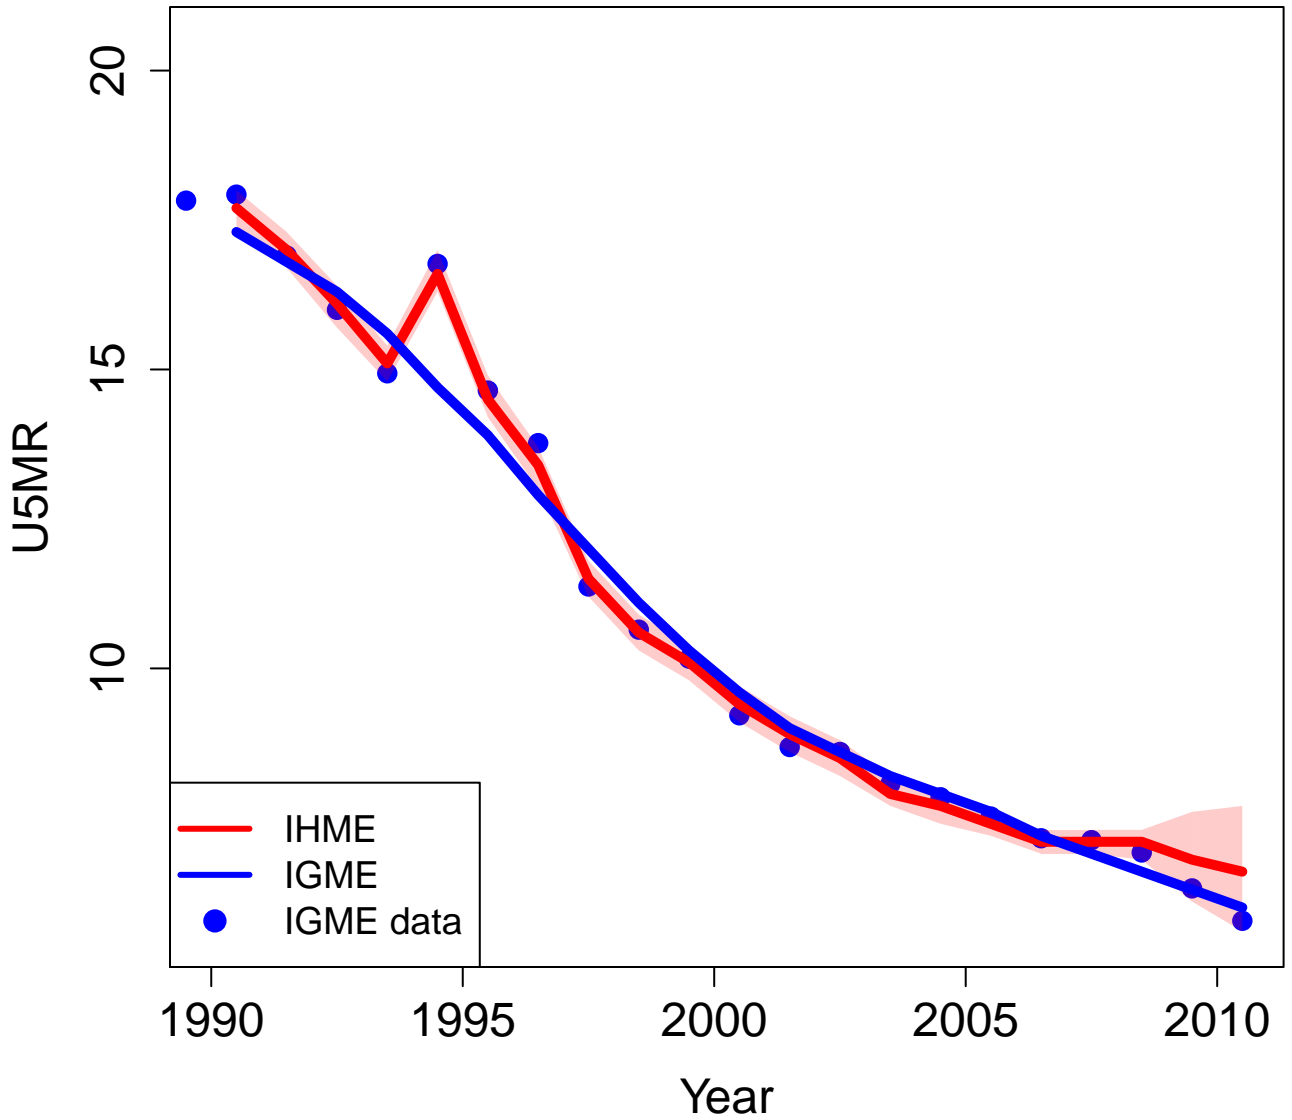

# Portugal

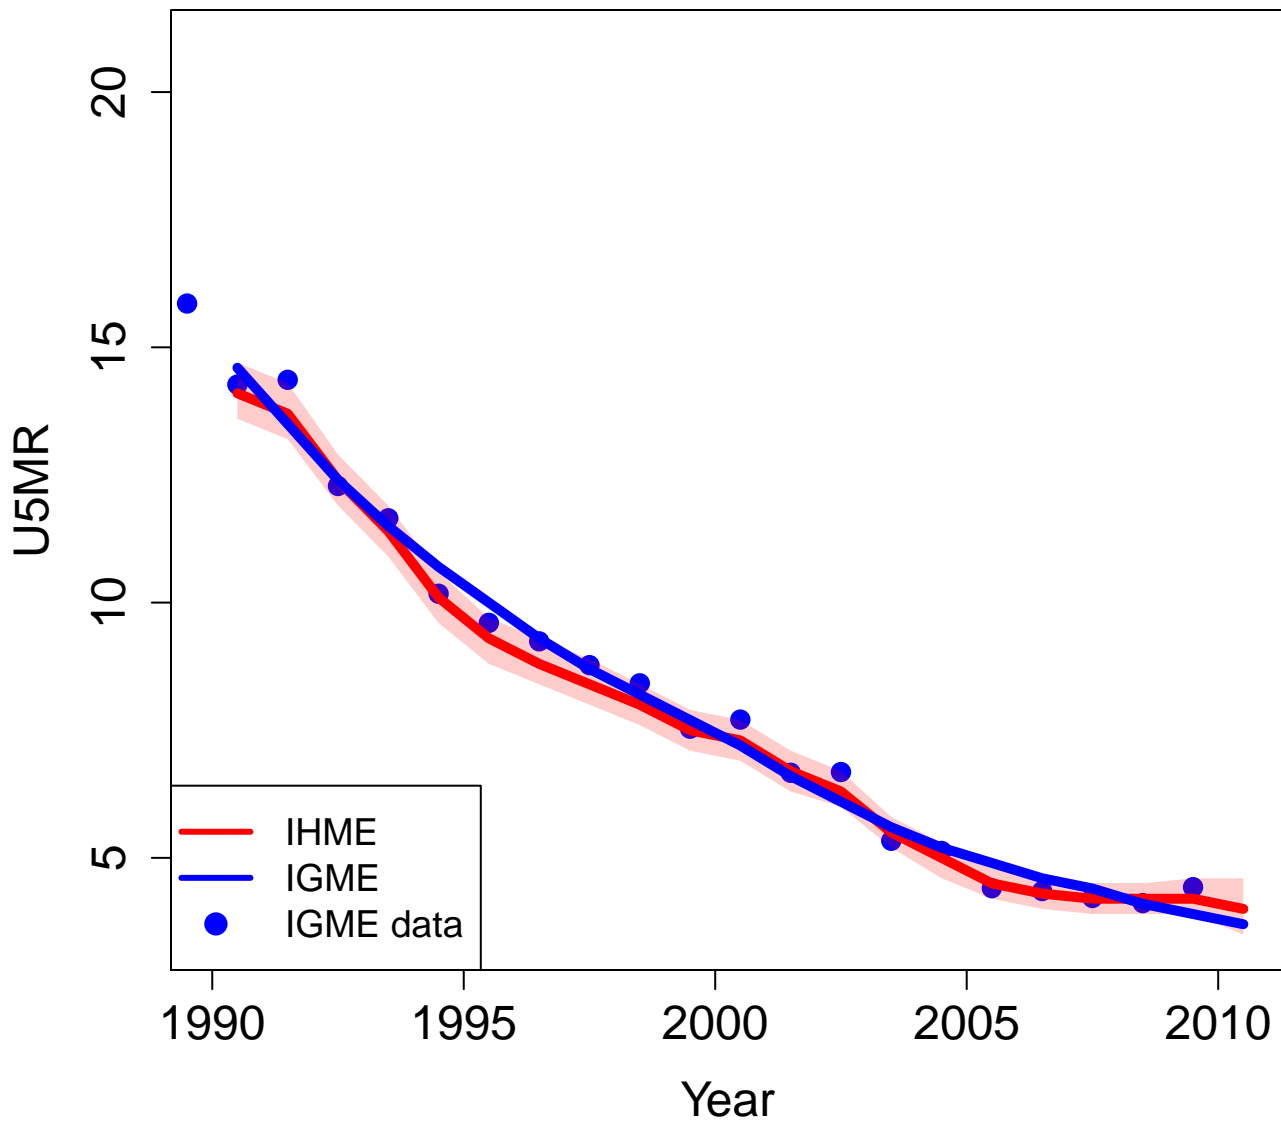

# Qatar

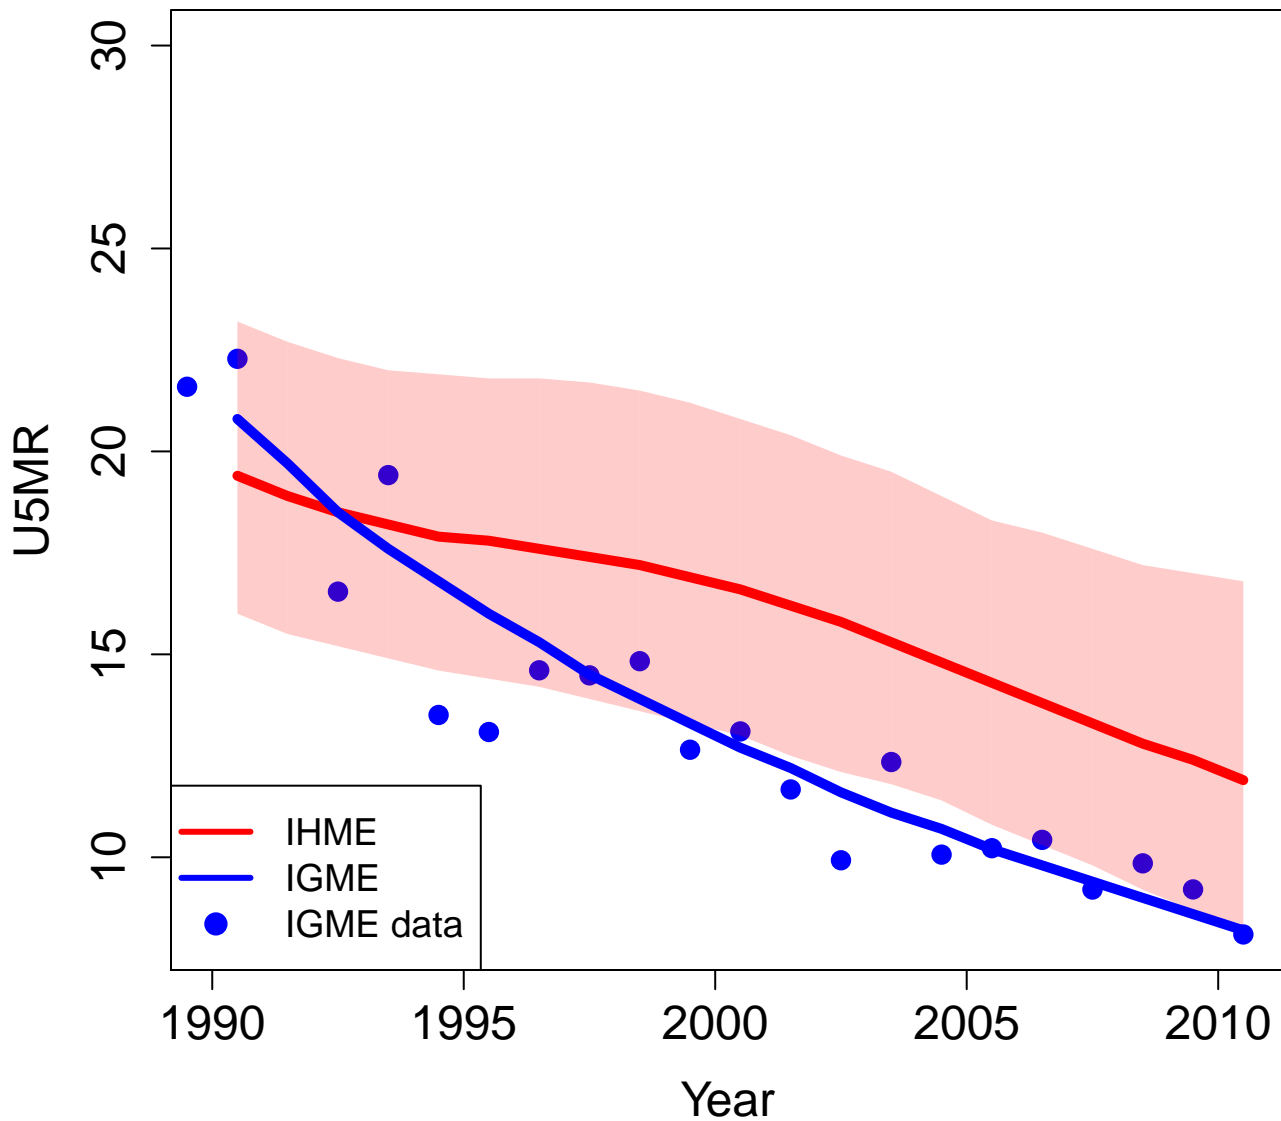

# South Korea

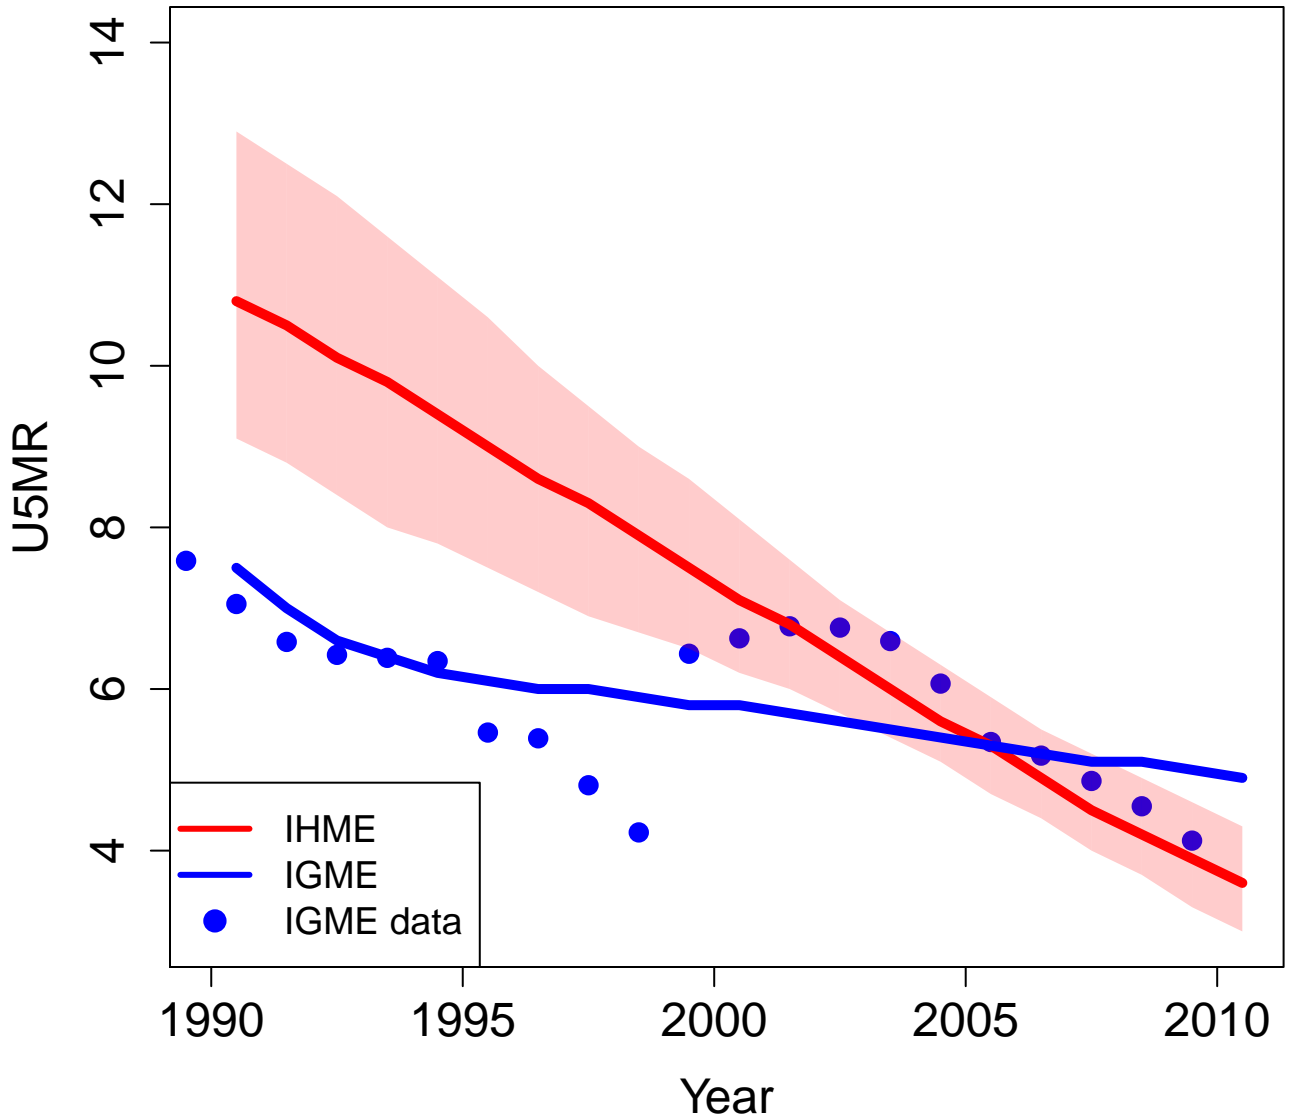

# Moldova

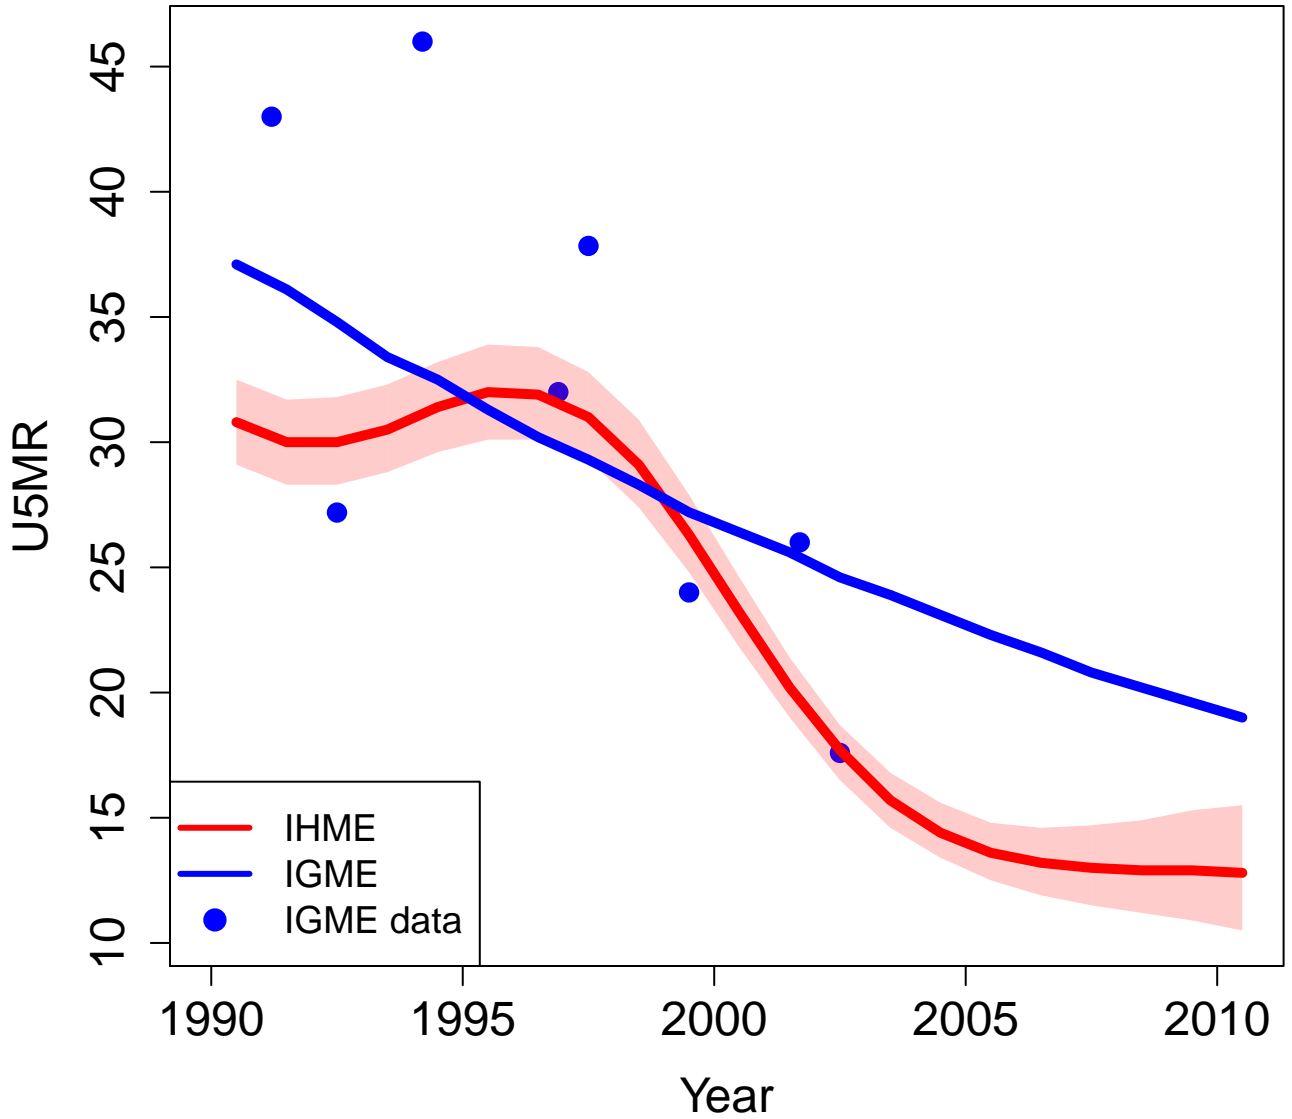



# Romania

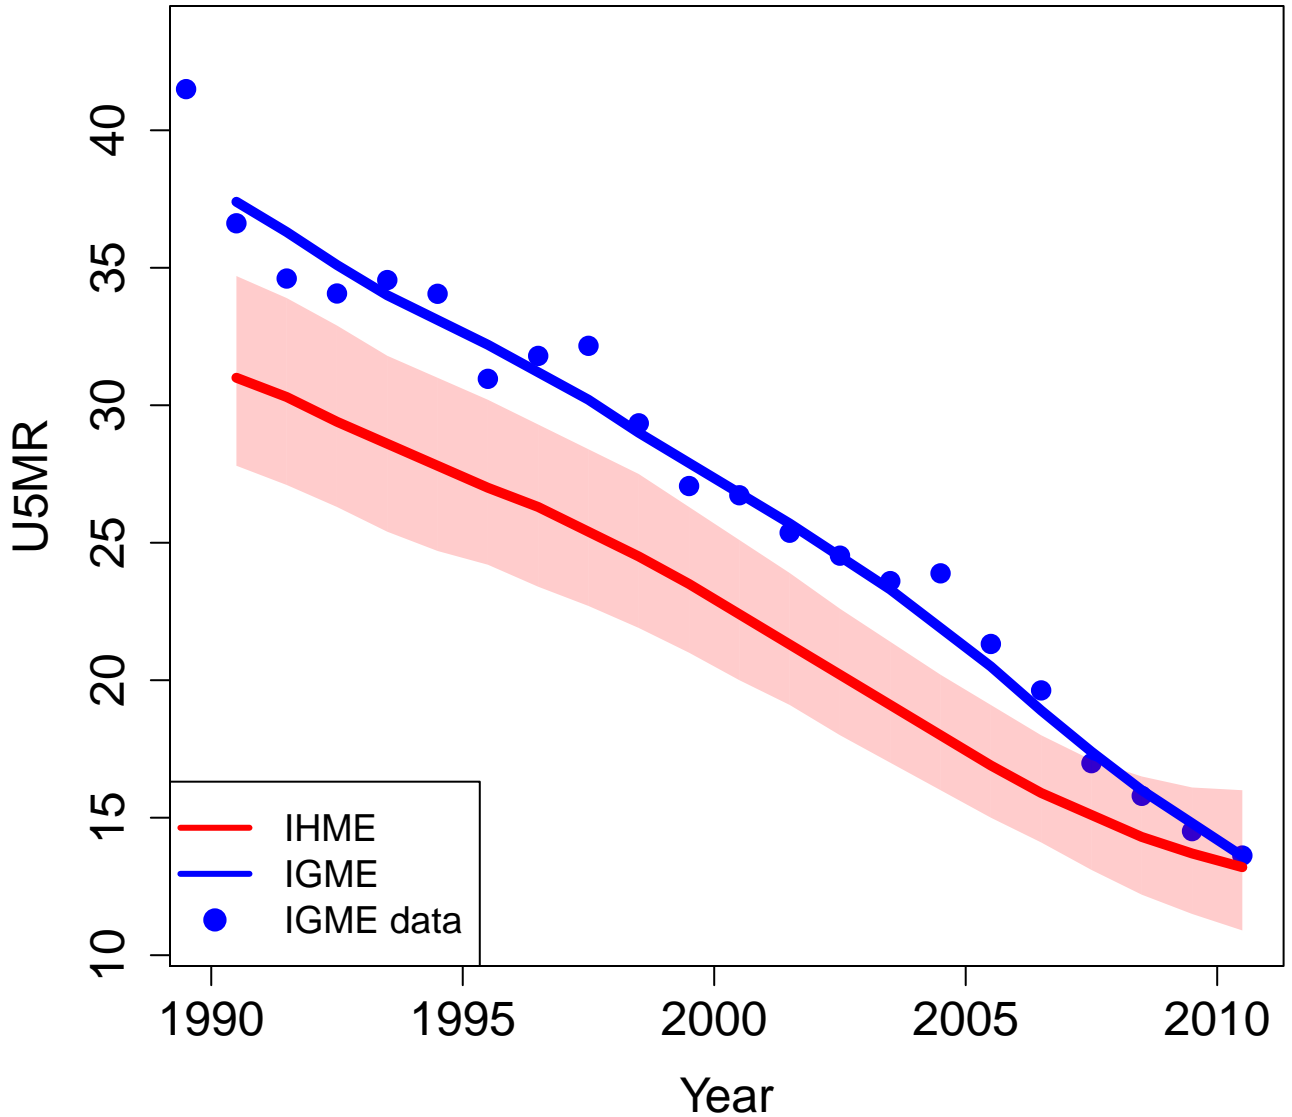

# Russian Federation

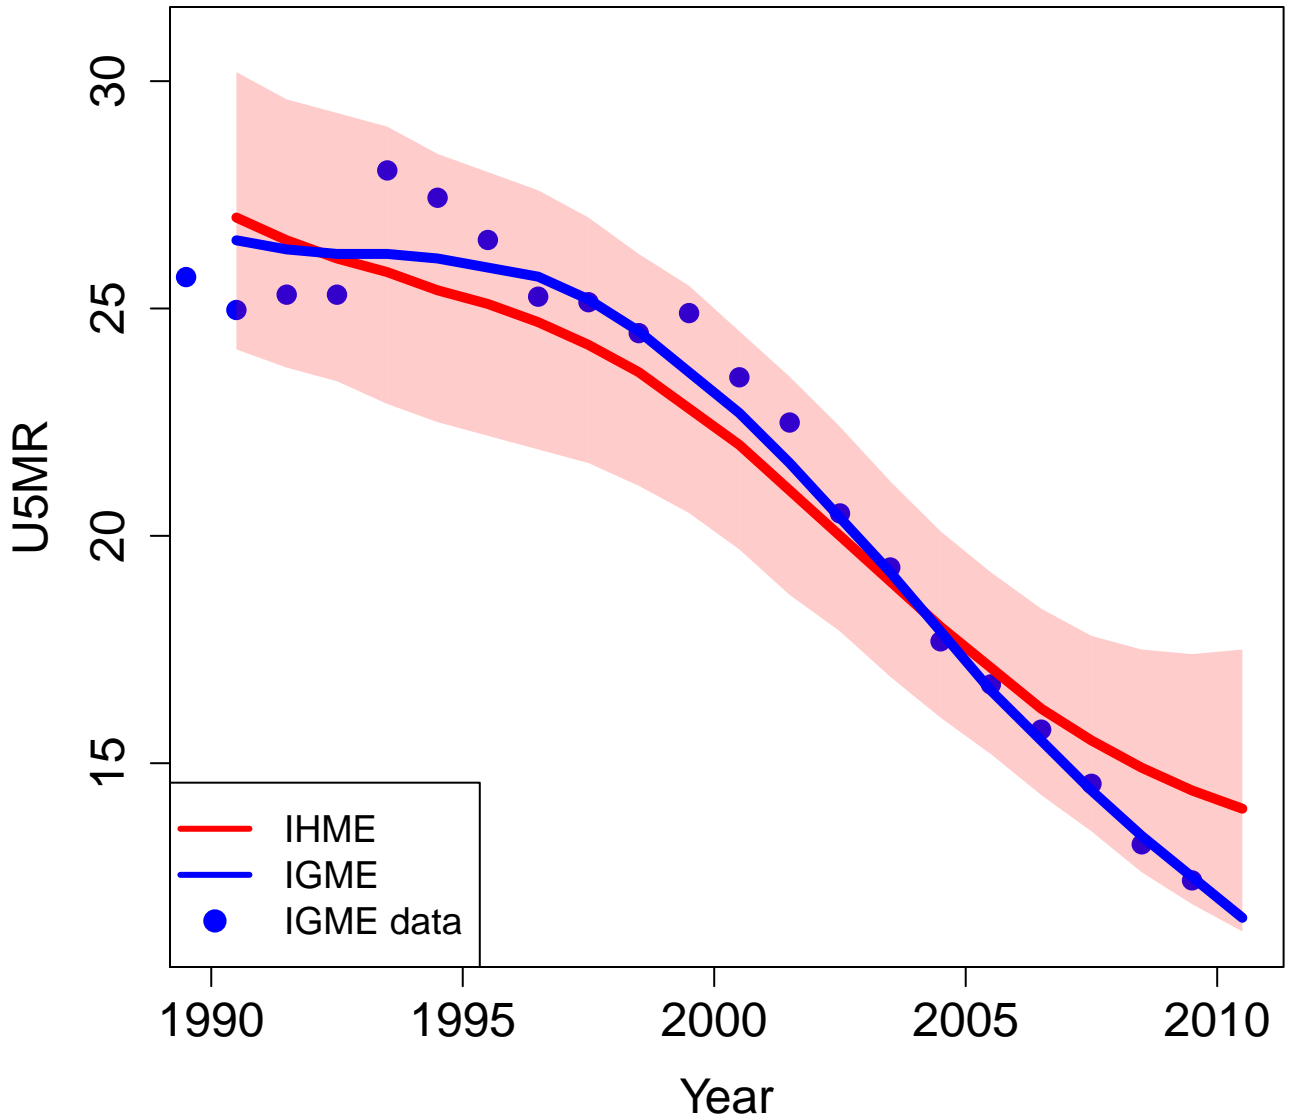

# Rwanda

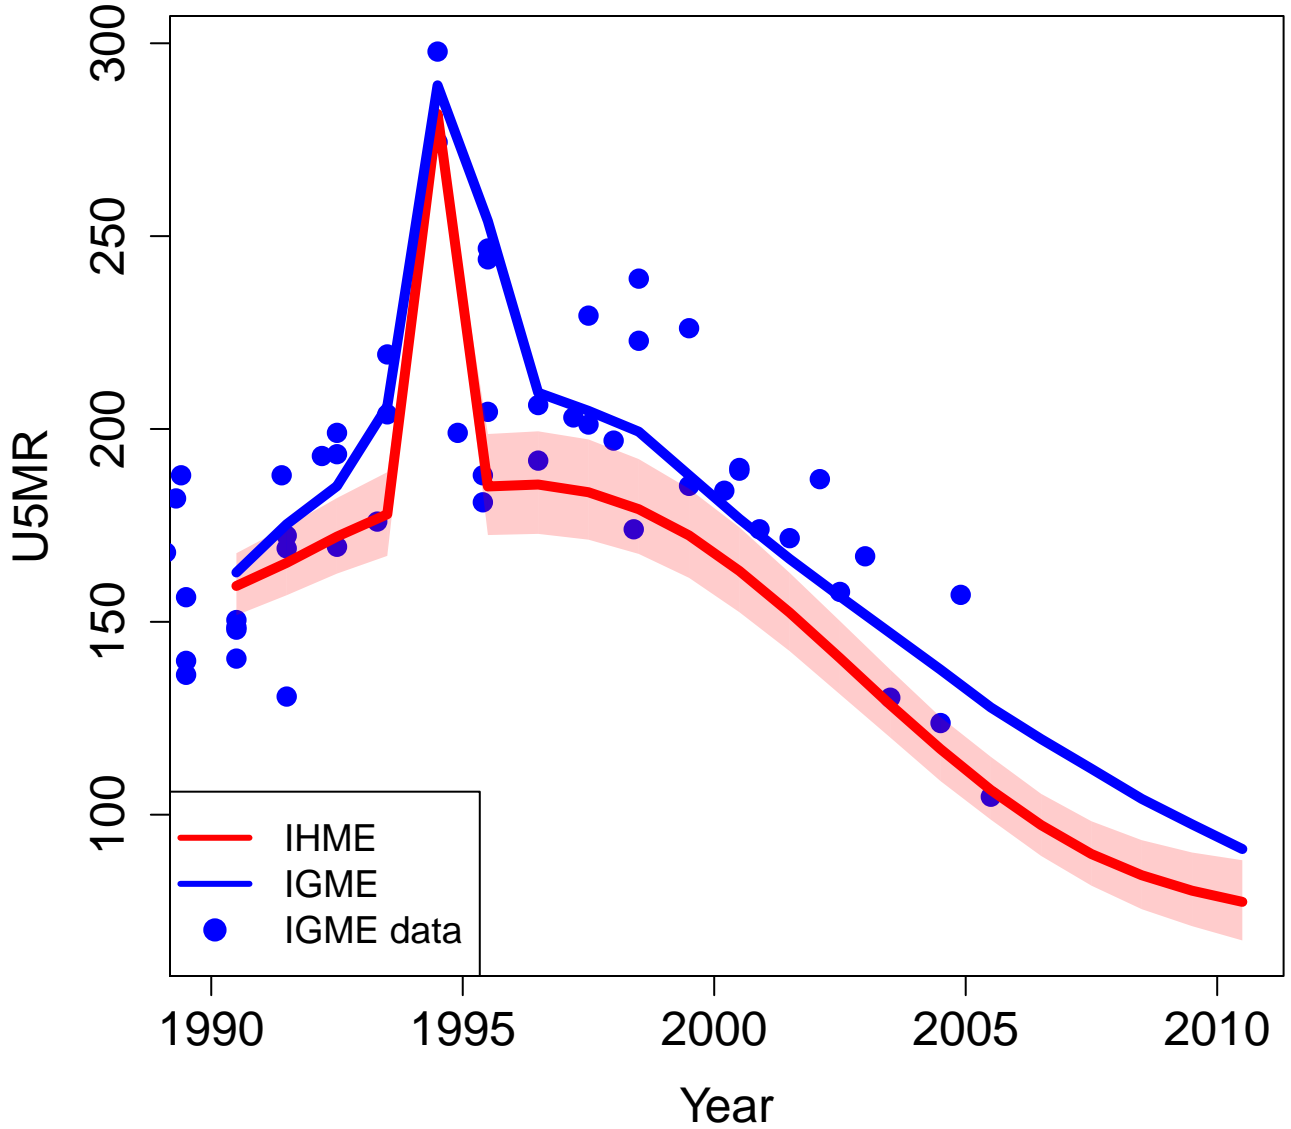

# Saint Lucia

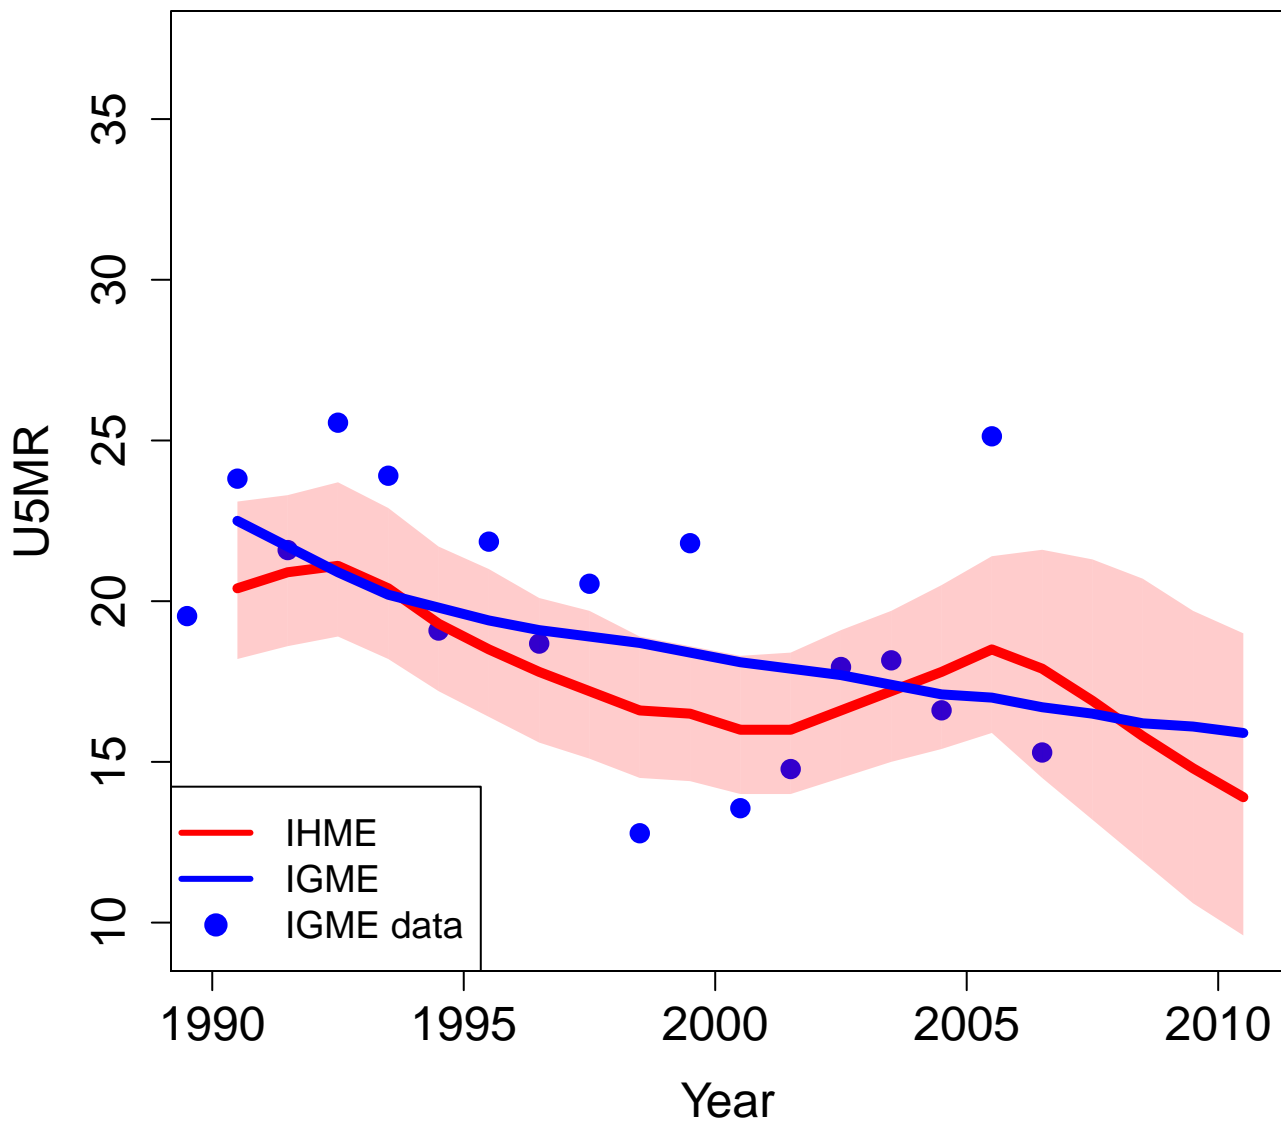

# St. Vincent & Gren.

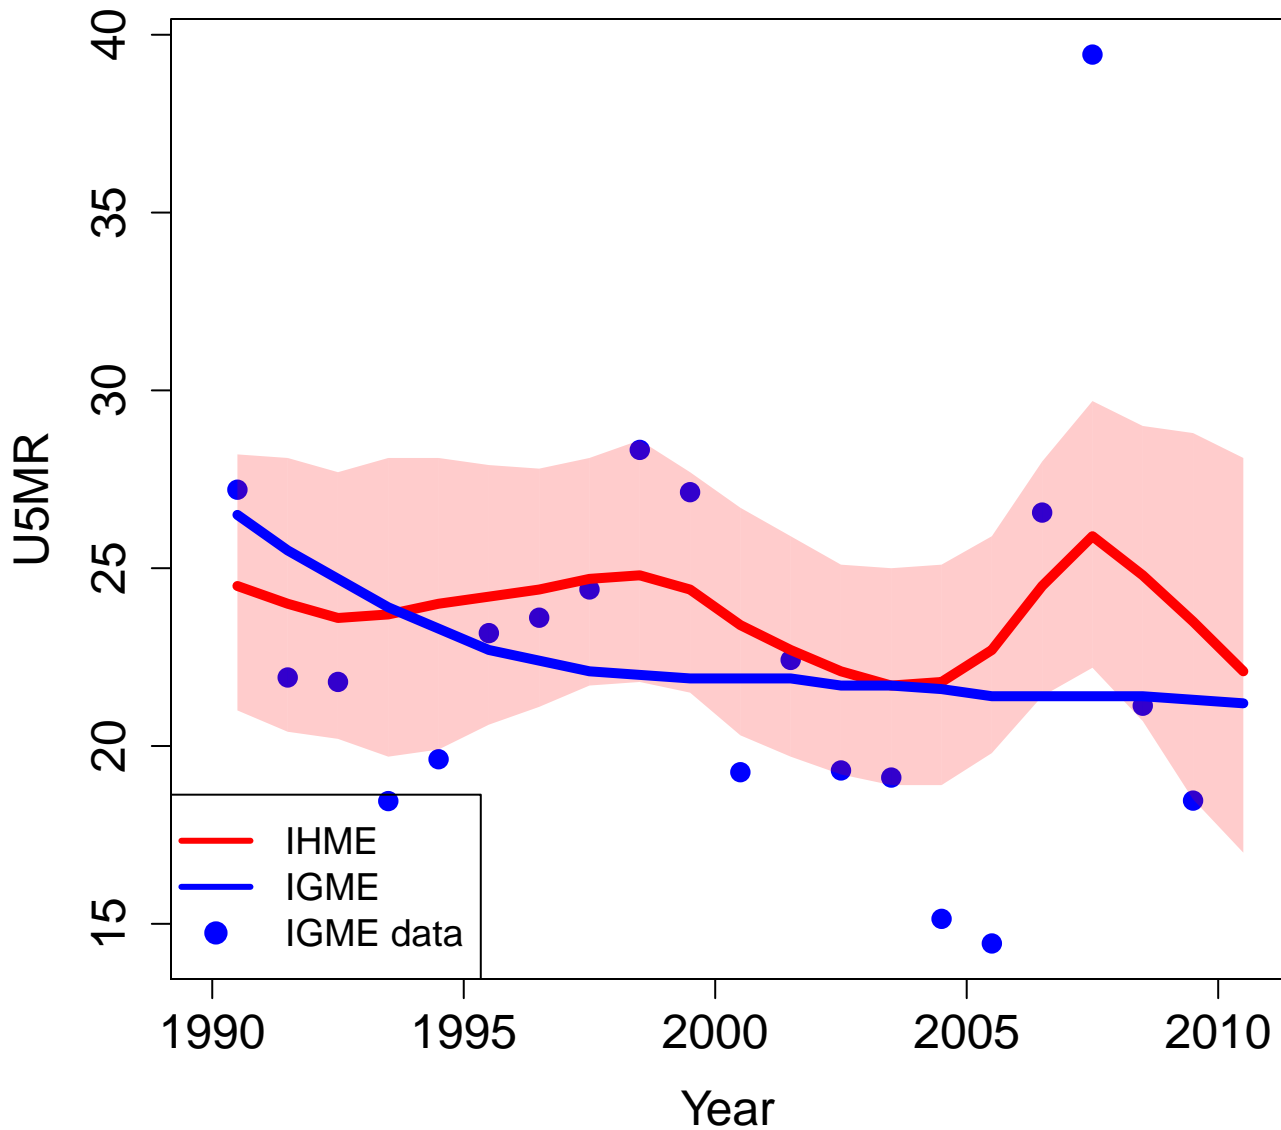

# Samoa

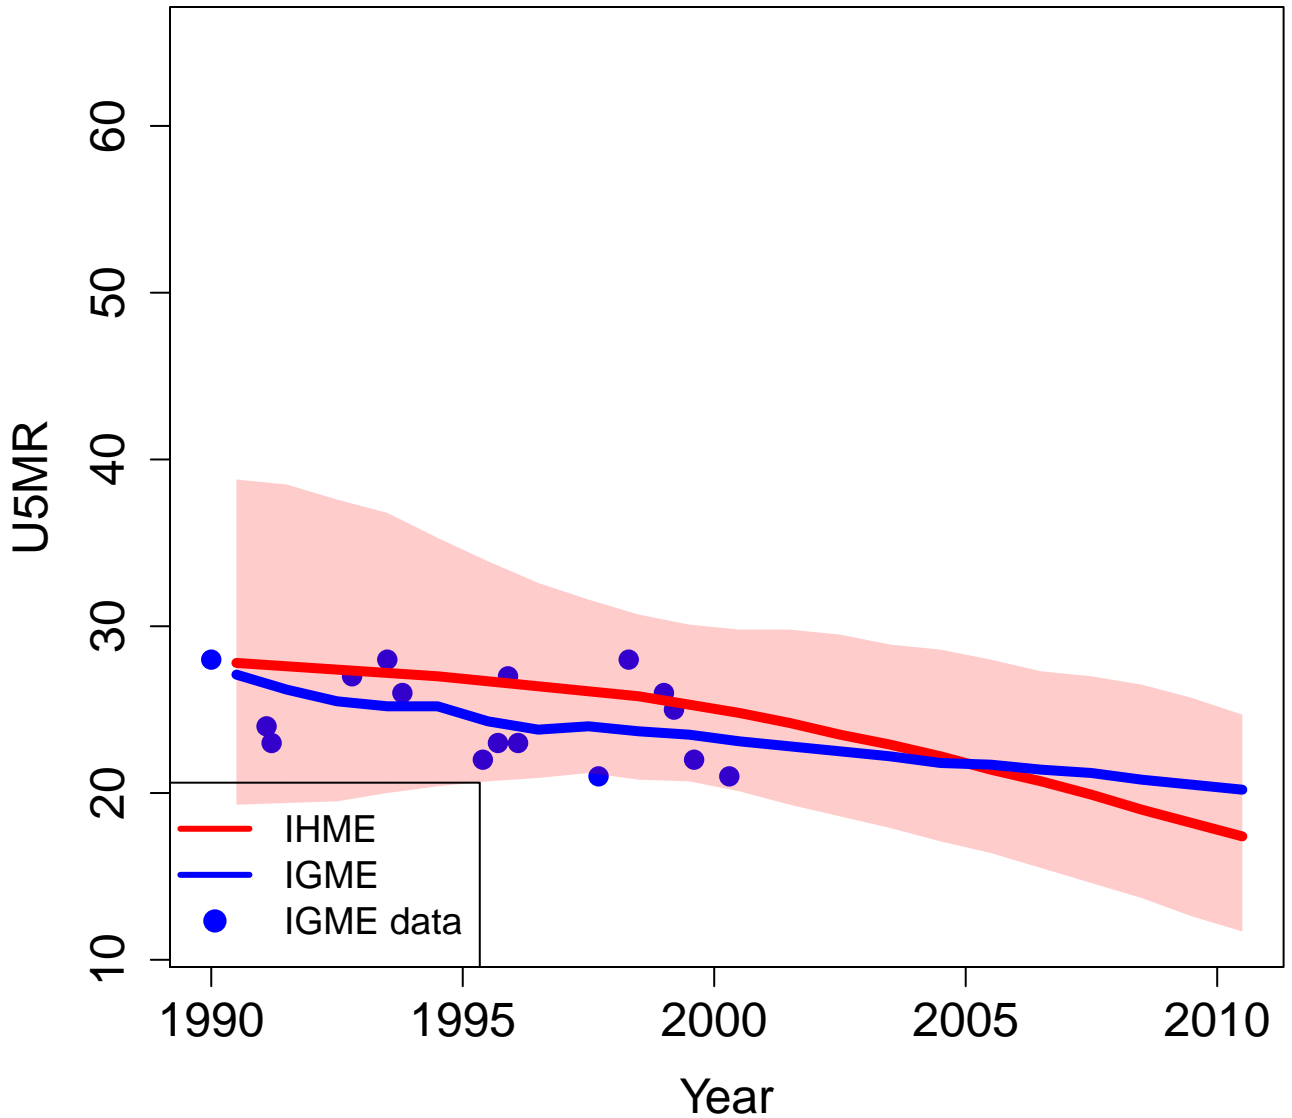

# Sao Tome Pr

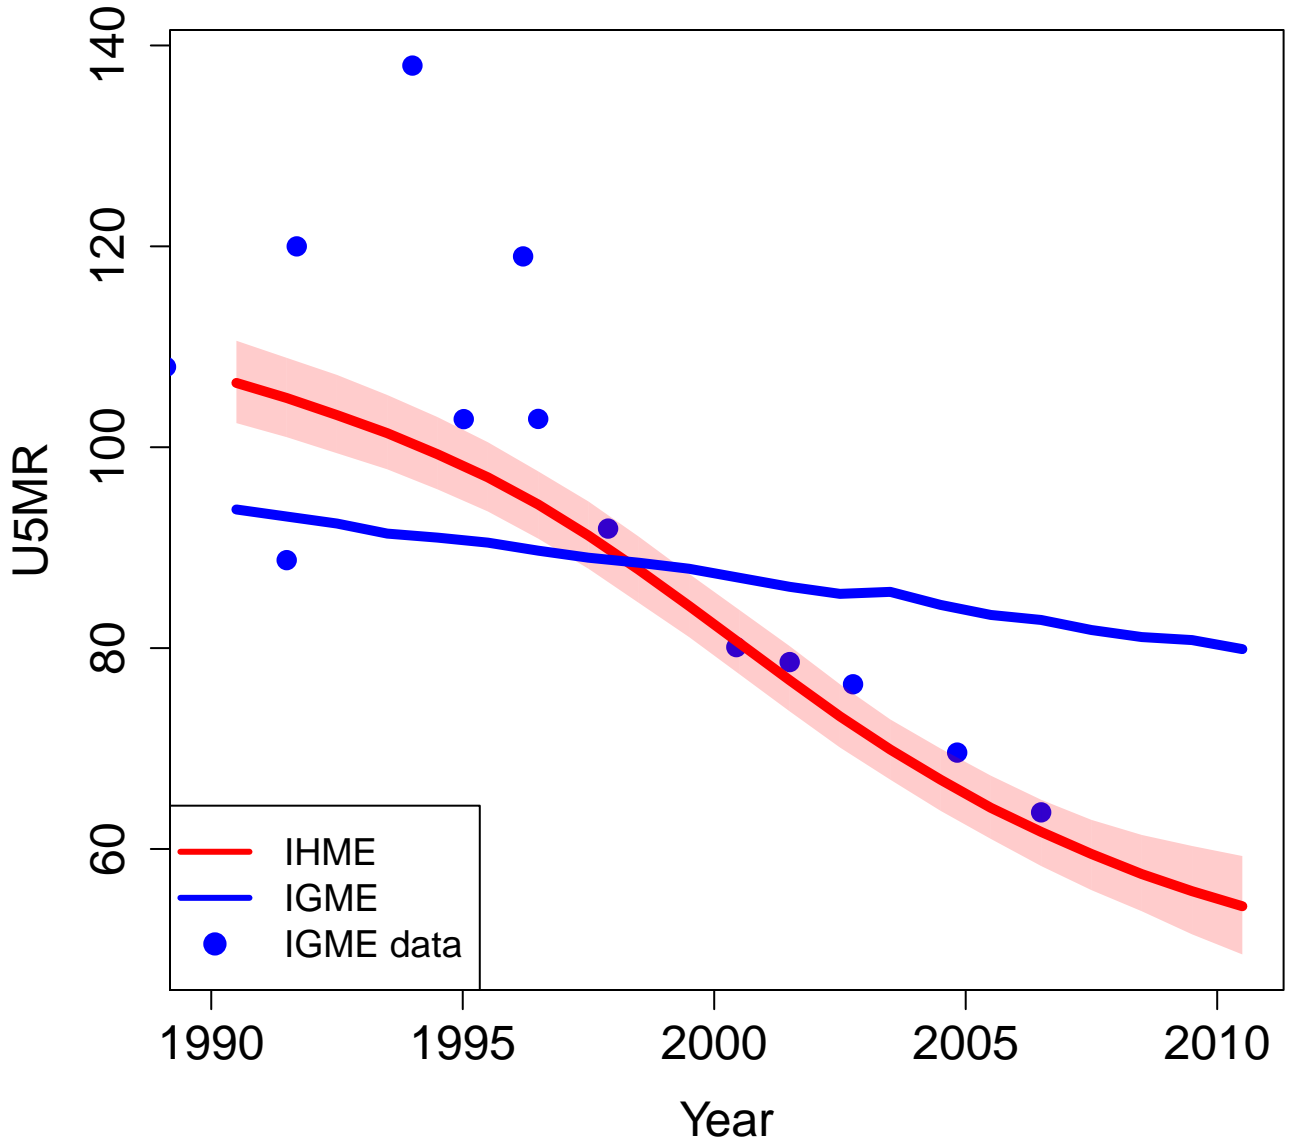

# Saudi Arabia

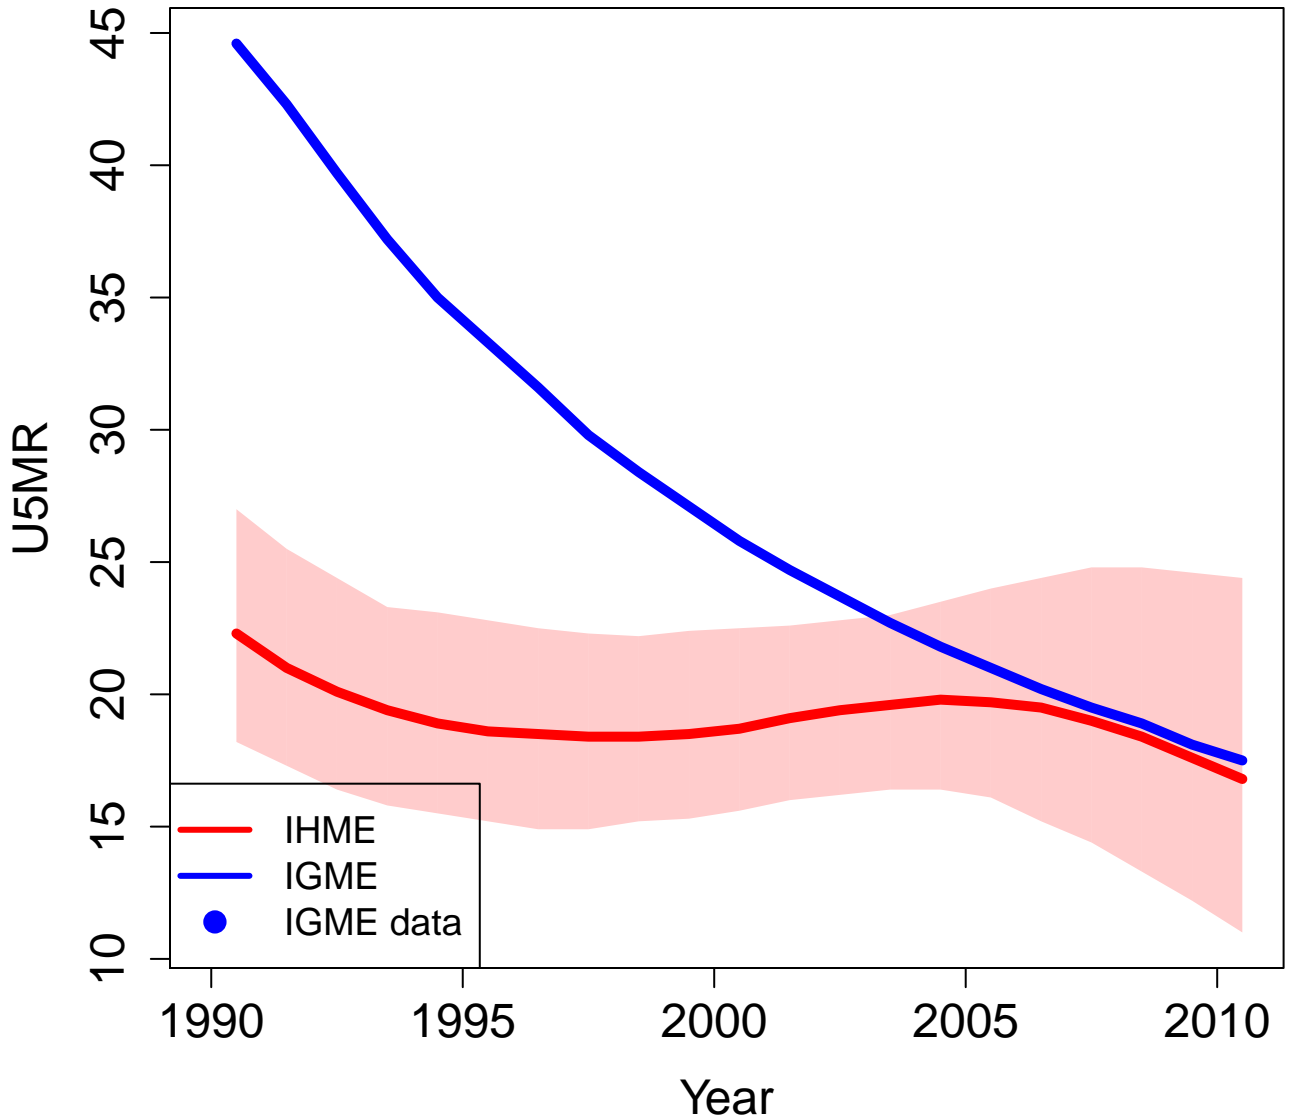



# Senegal

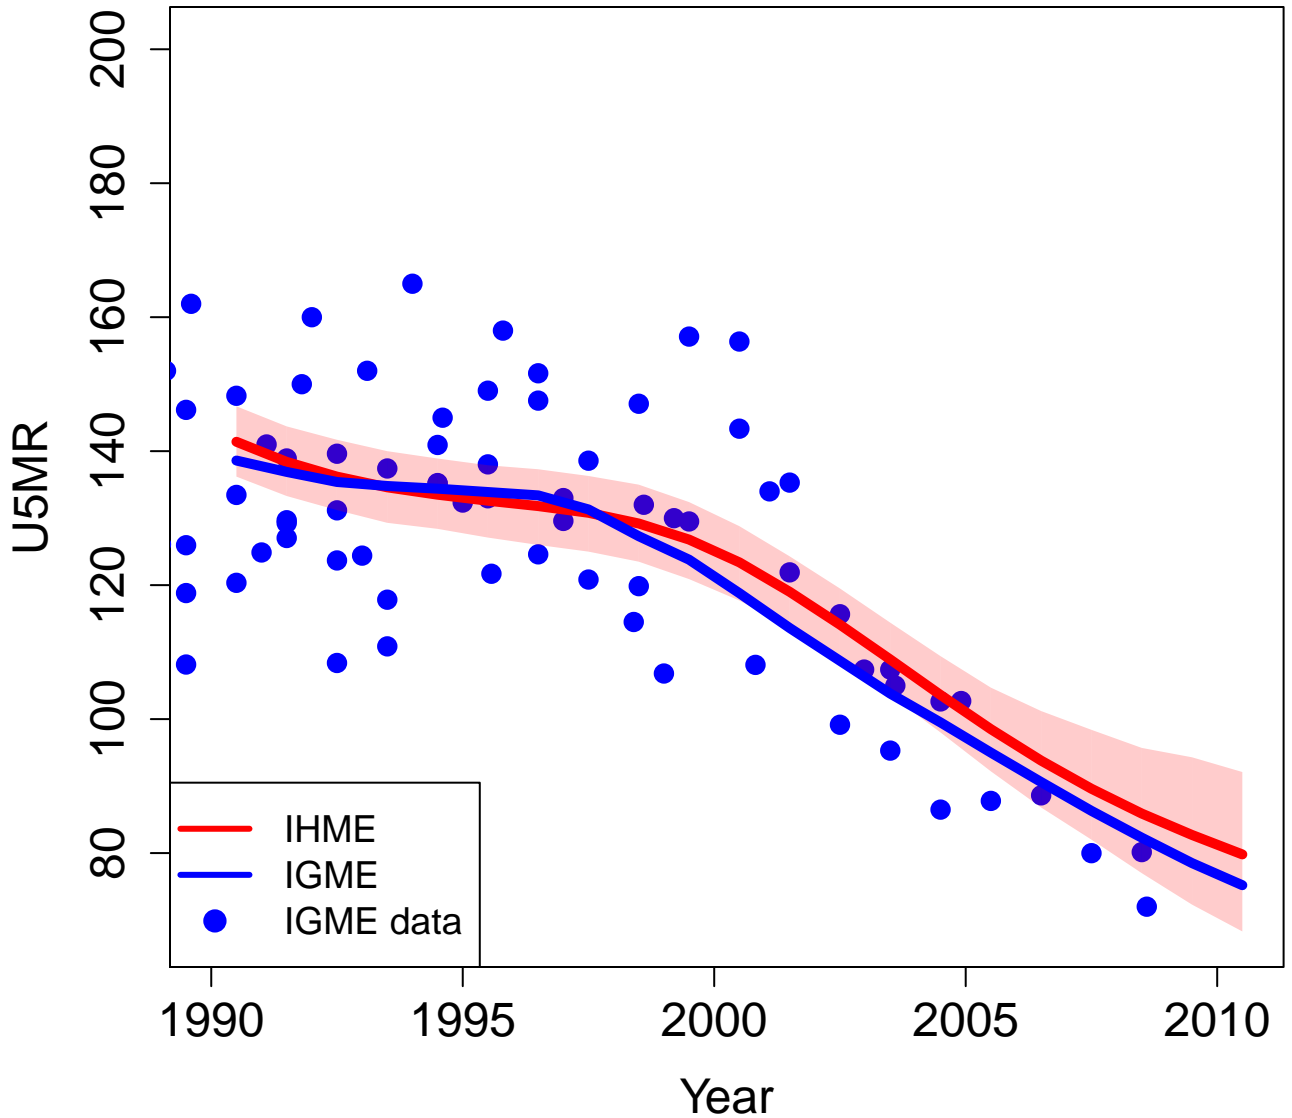

# Serbia

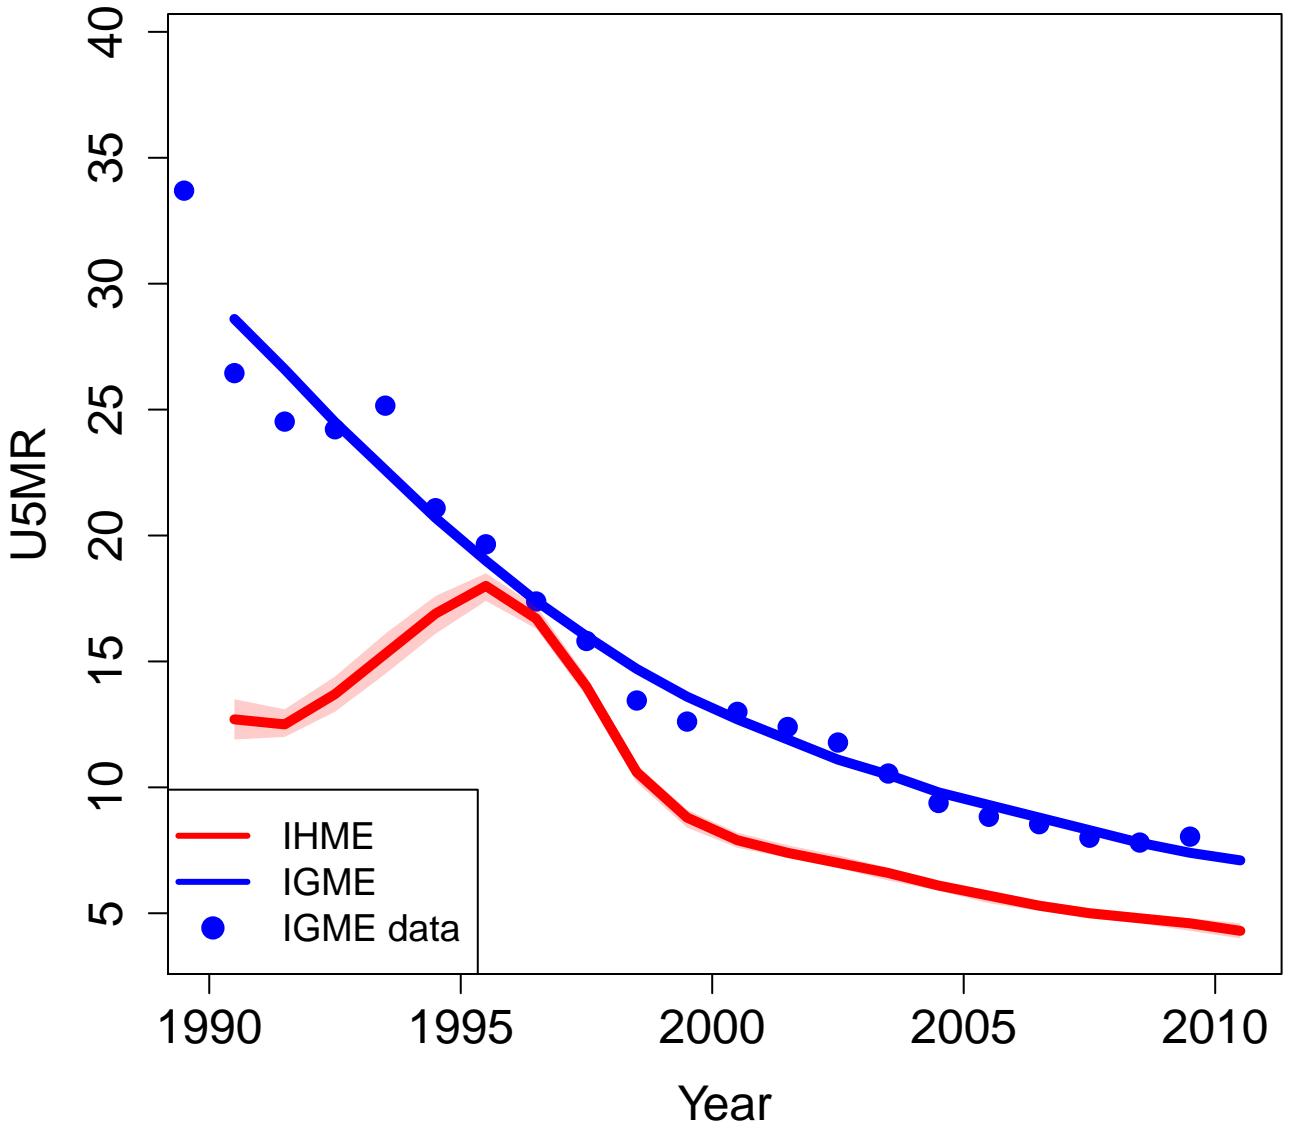

# Seychelles

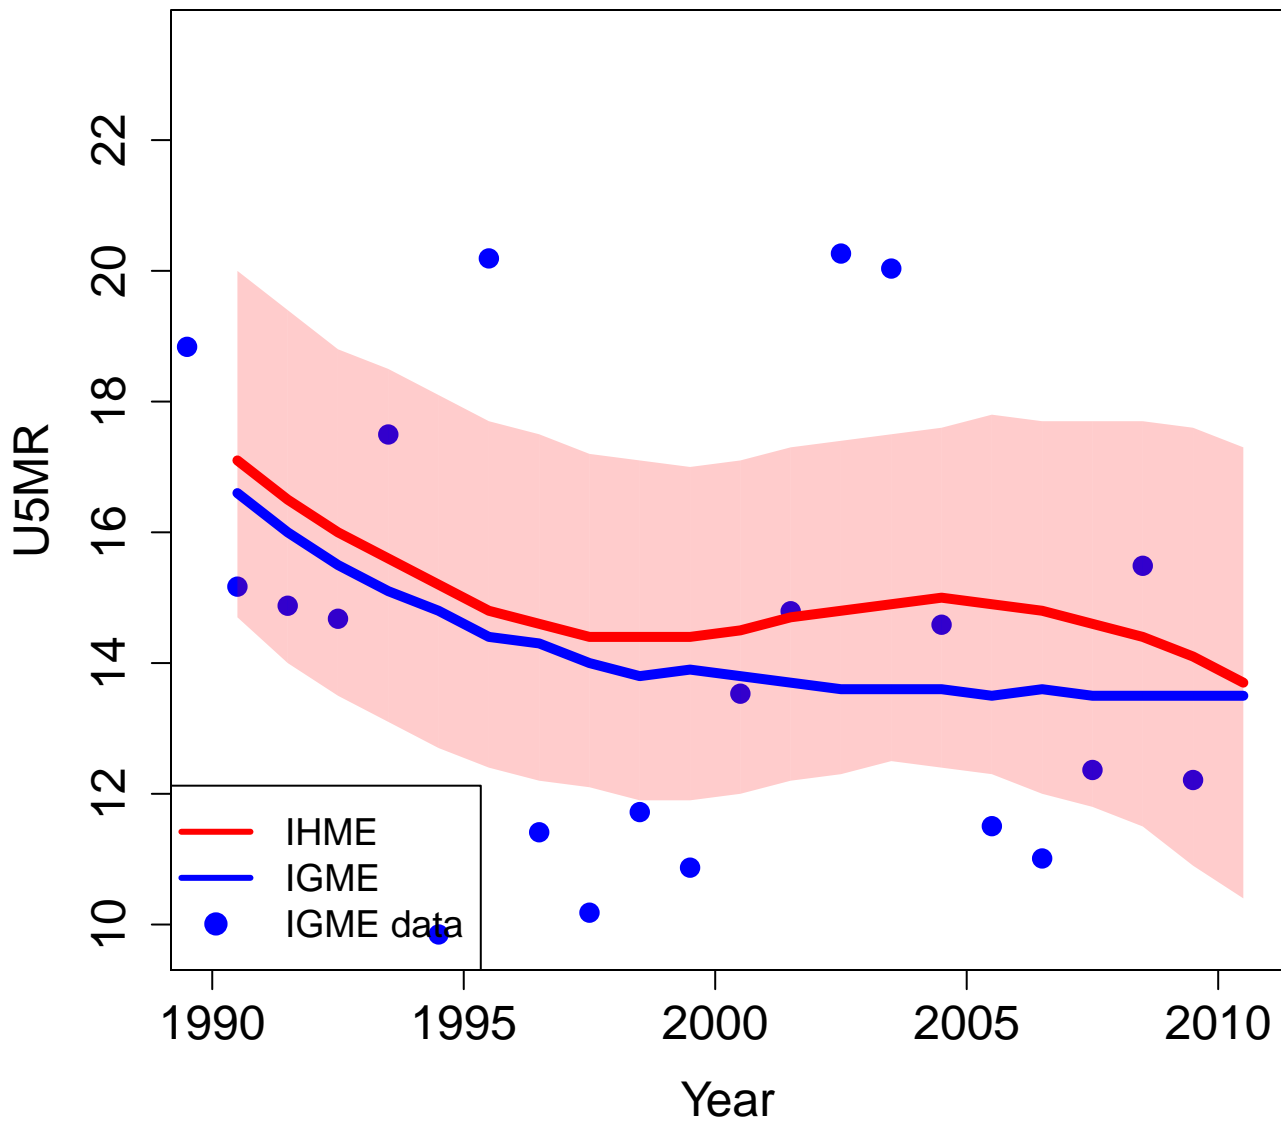

# Sierra Leone

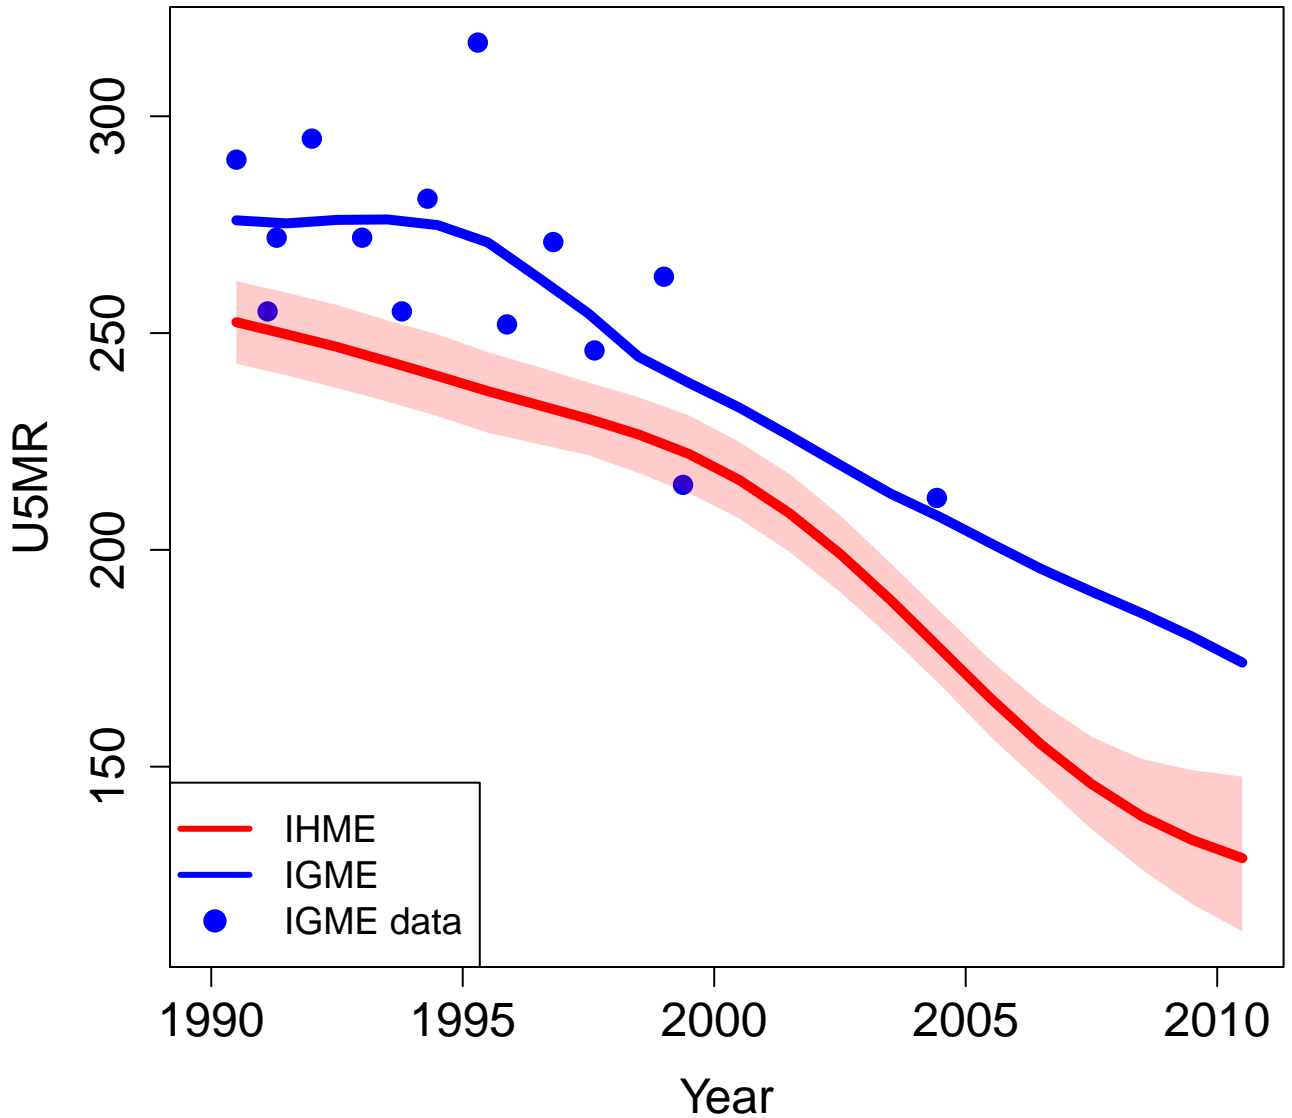

# Singapore

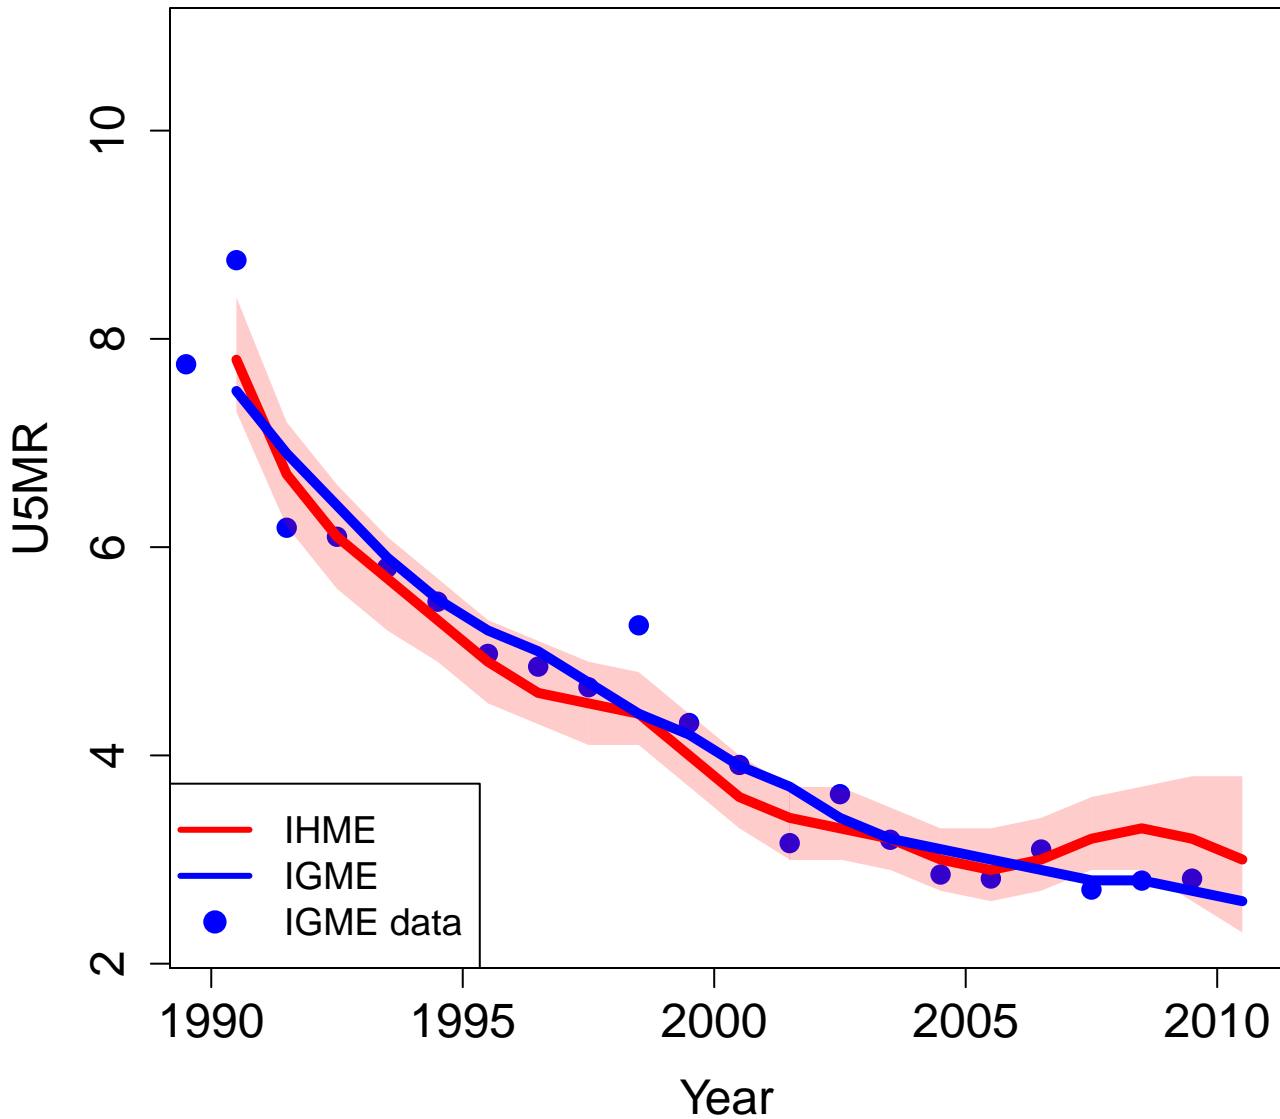

# Slovakia

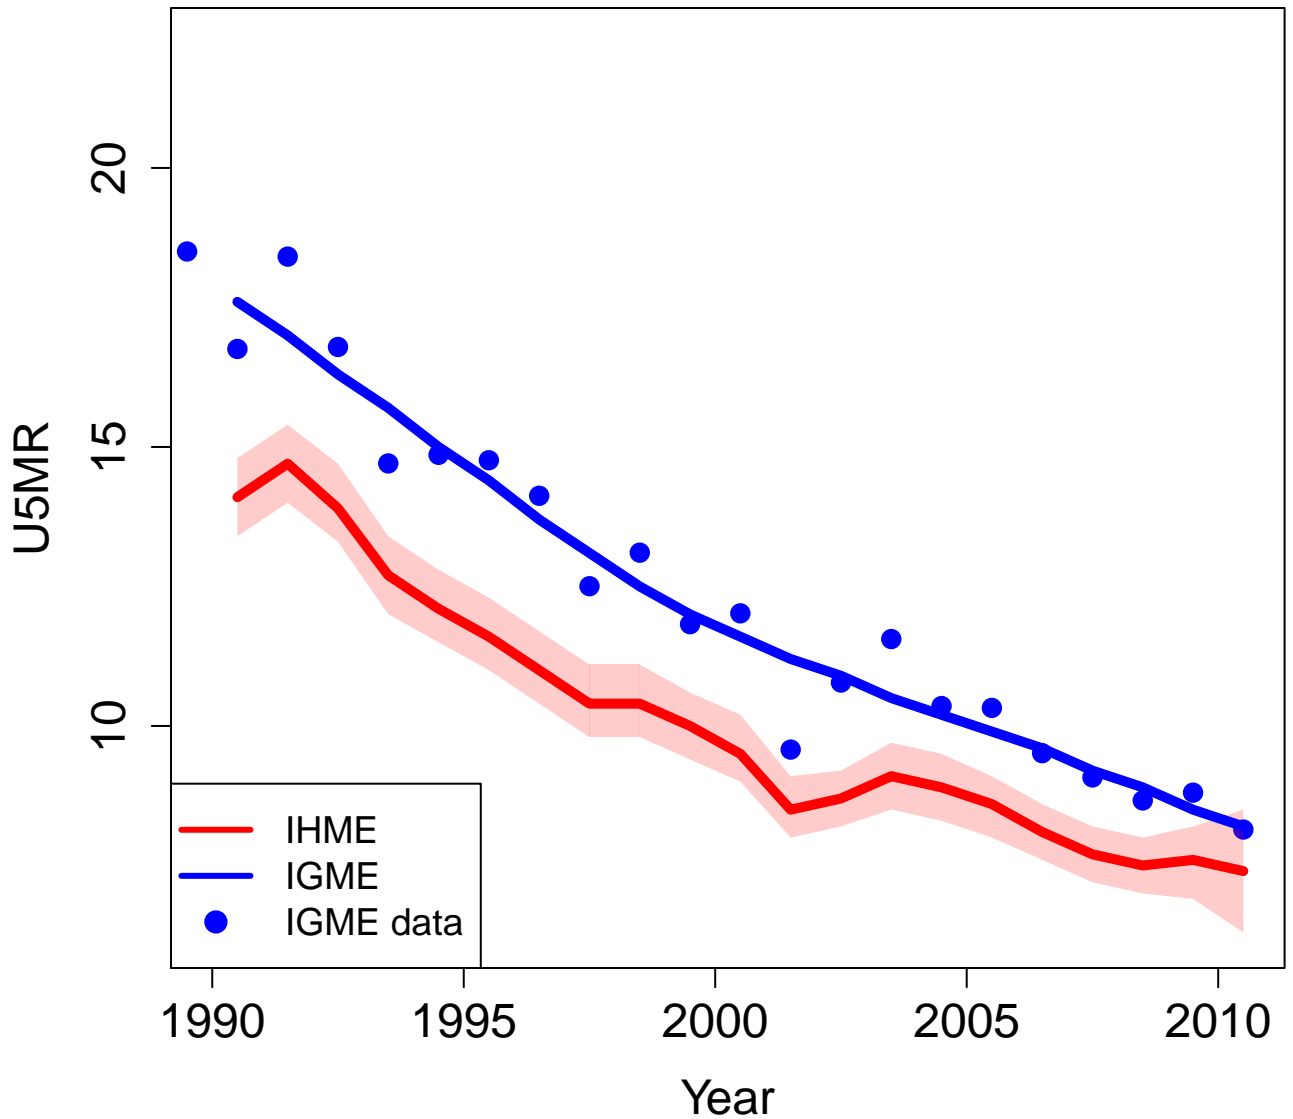

# Slovenia

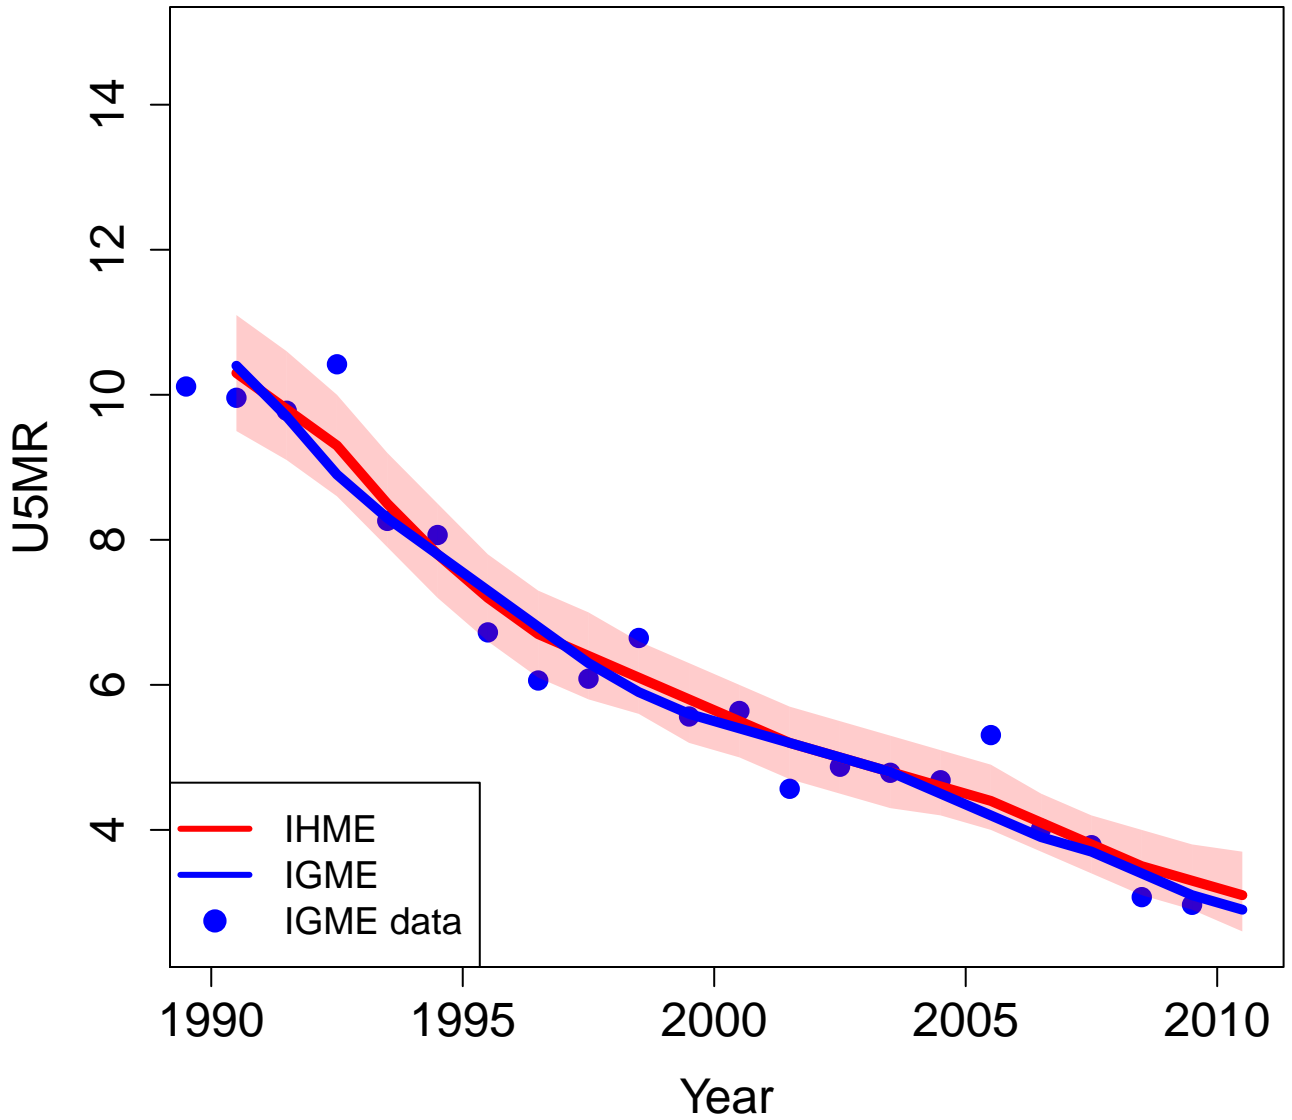

# Solomon Islands

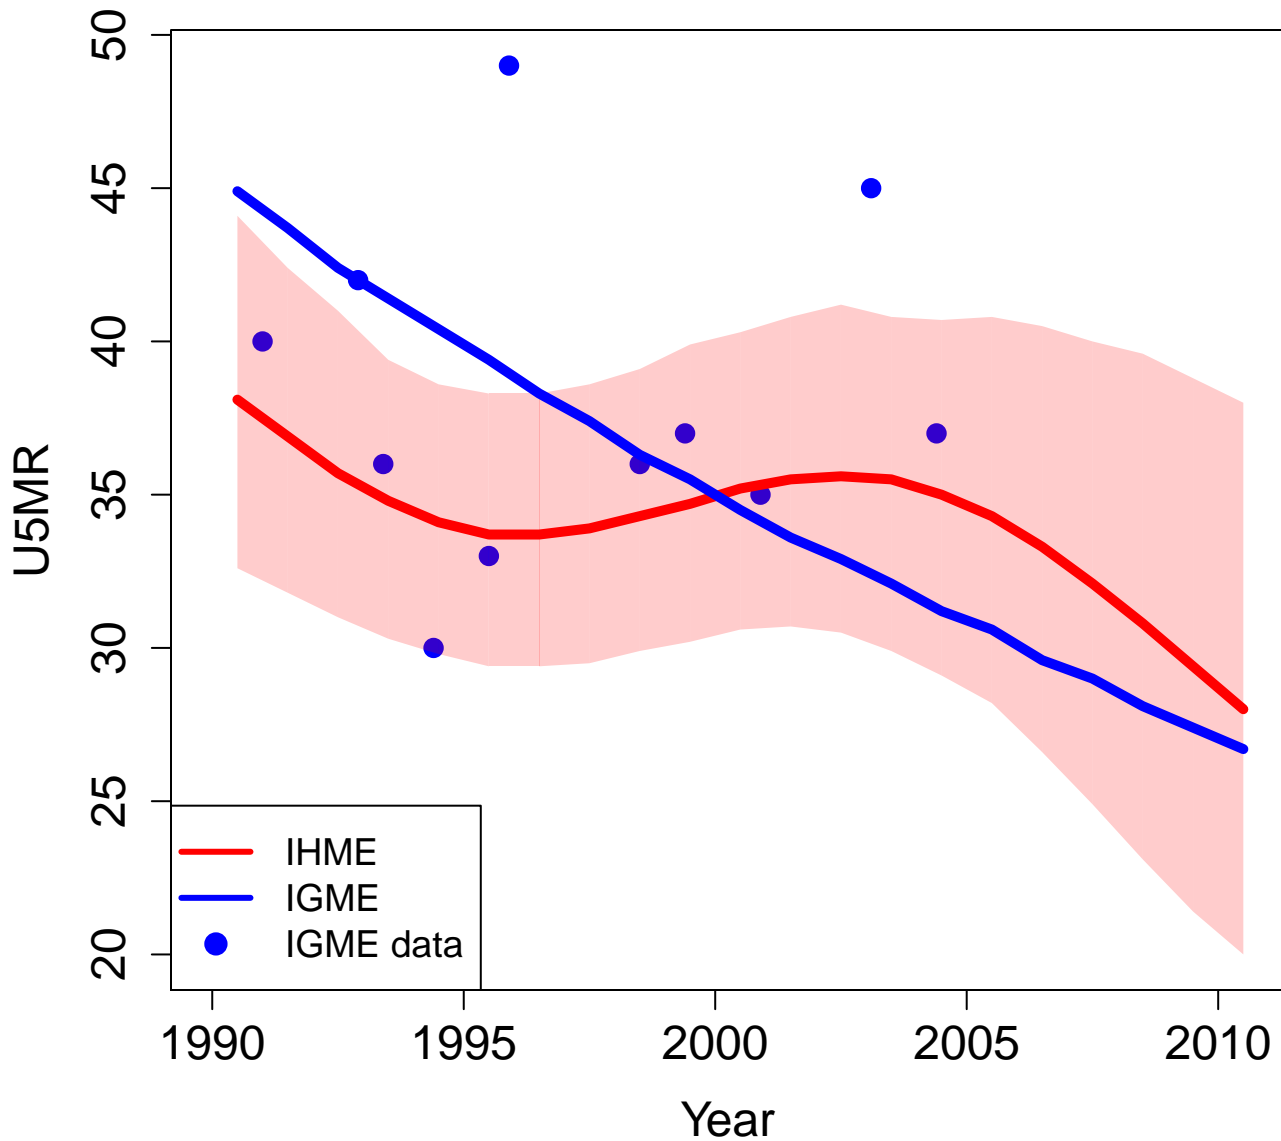



# Somalia

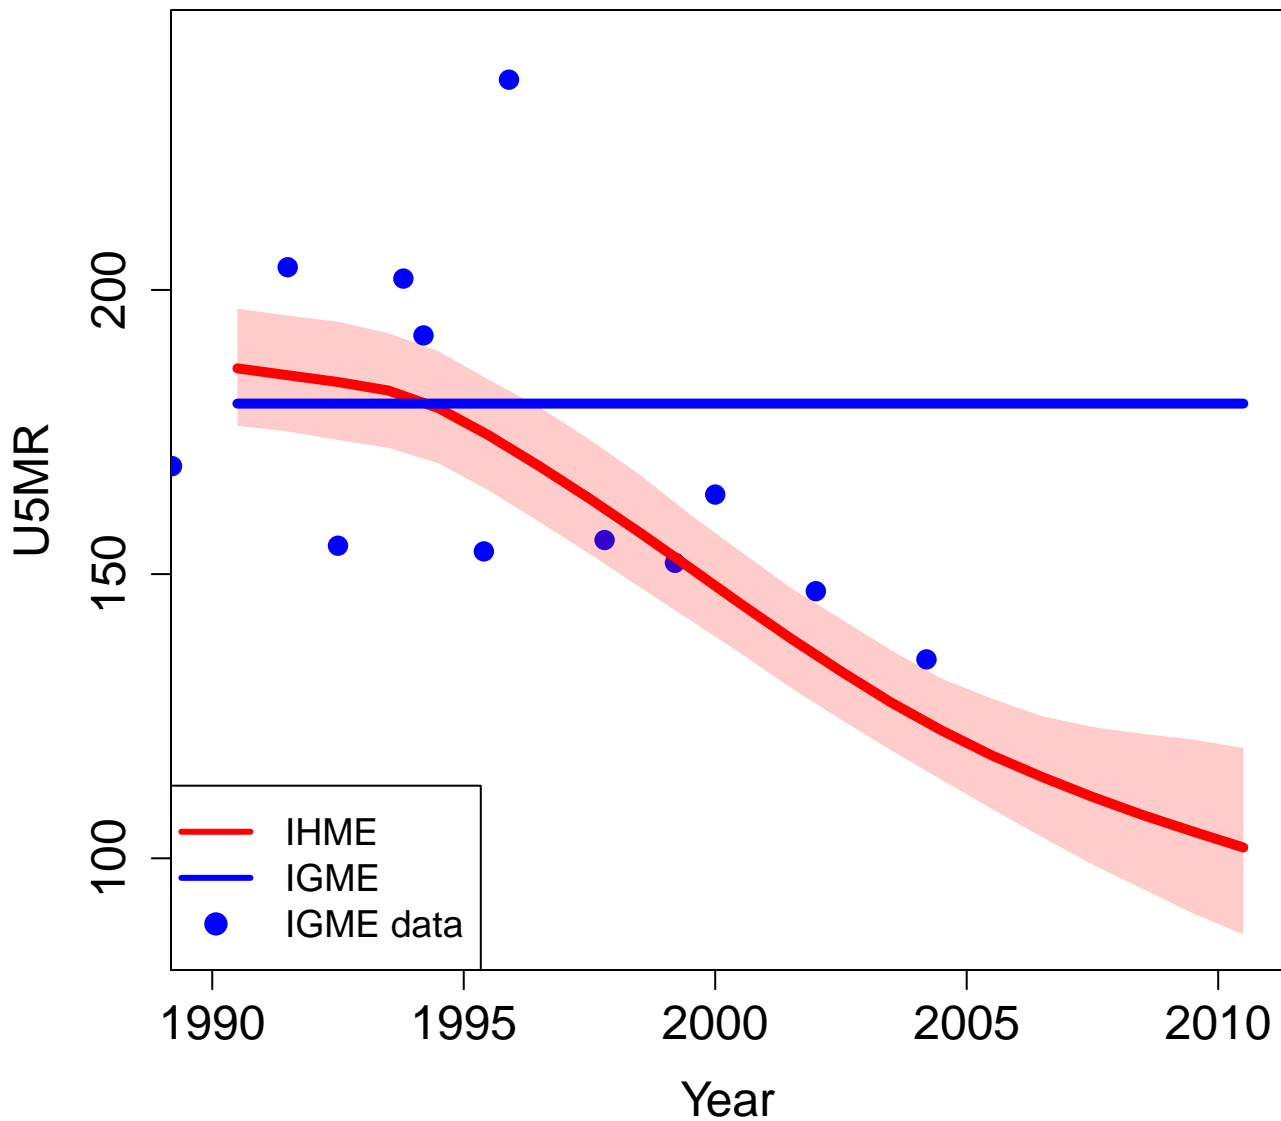

# South Africa

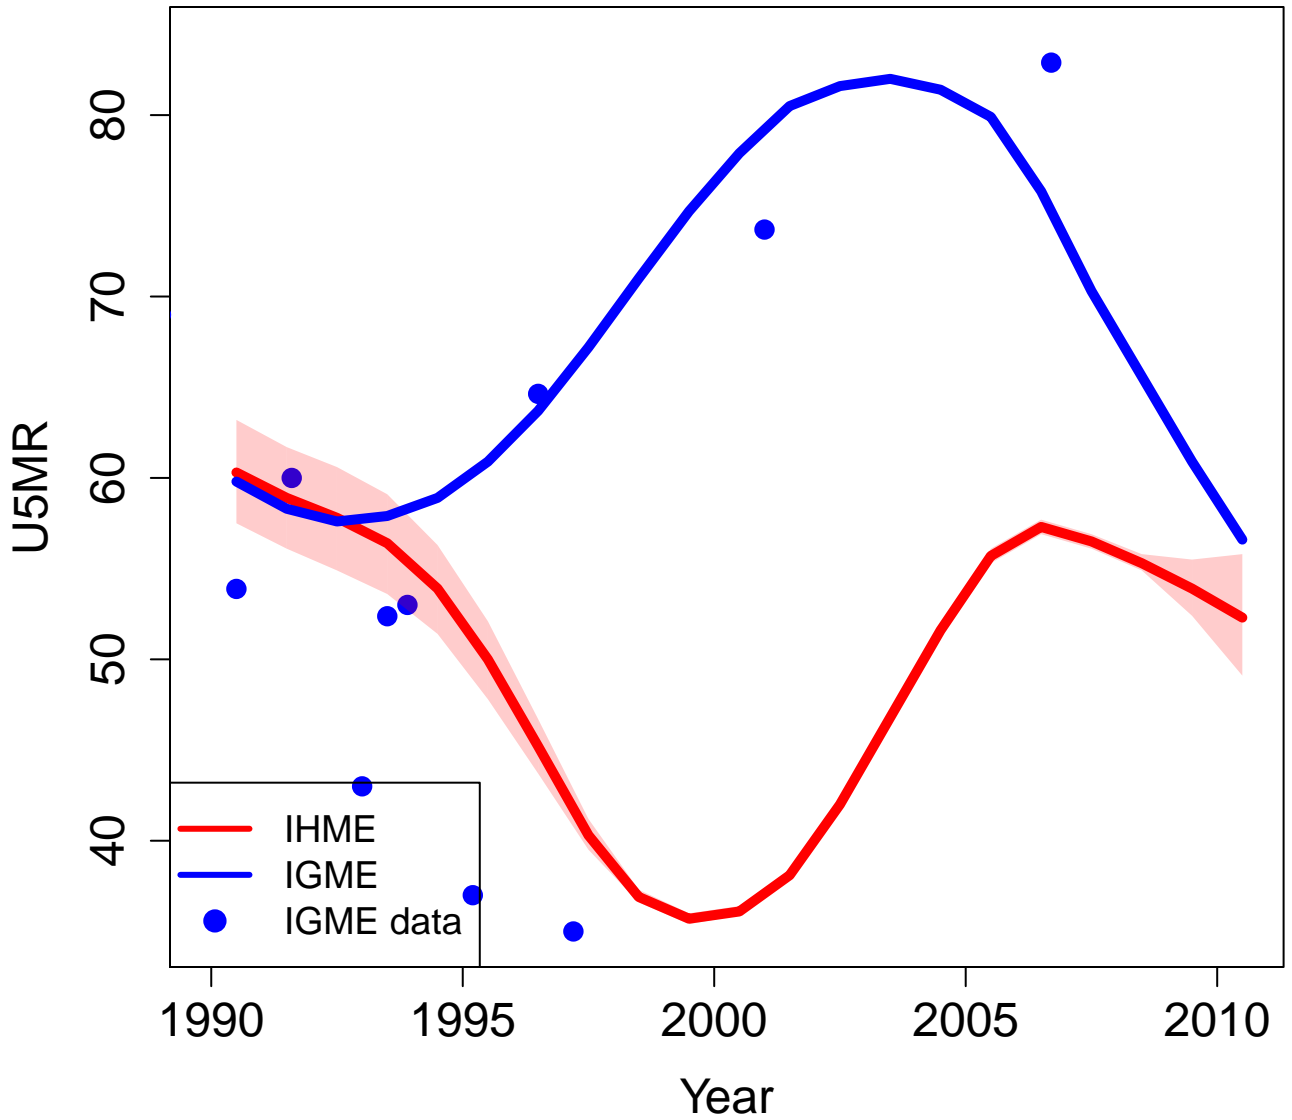

# Spain

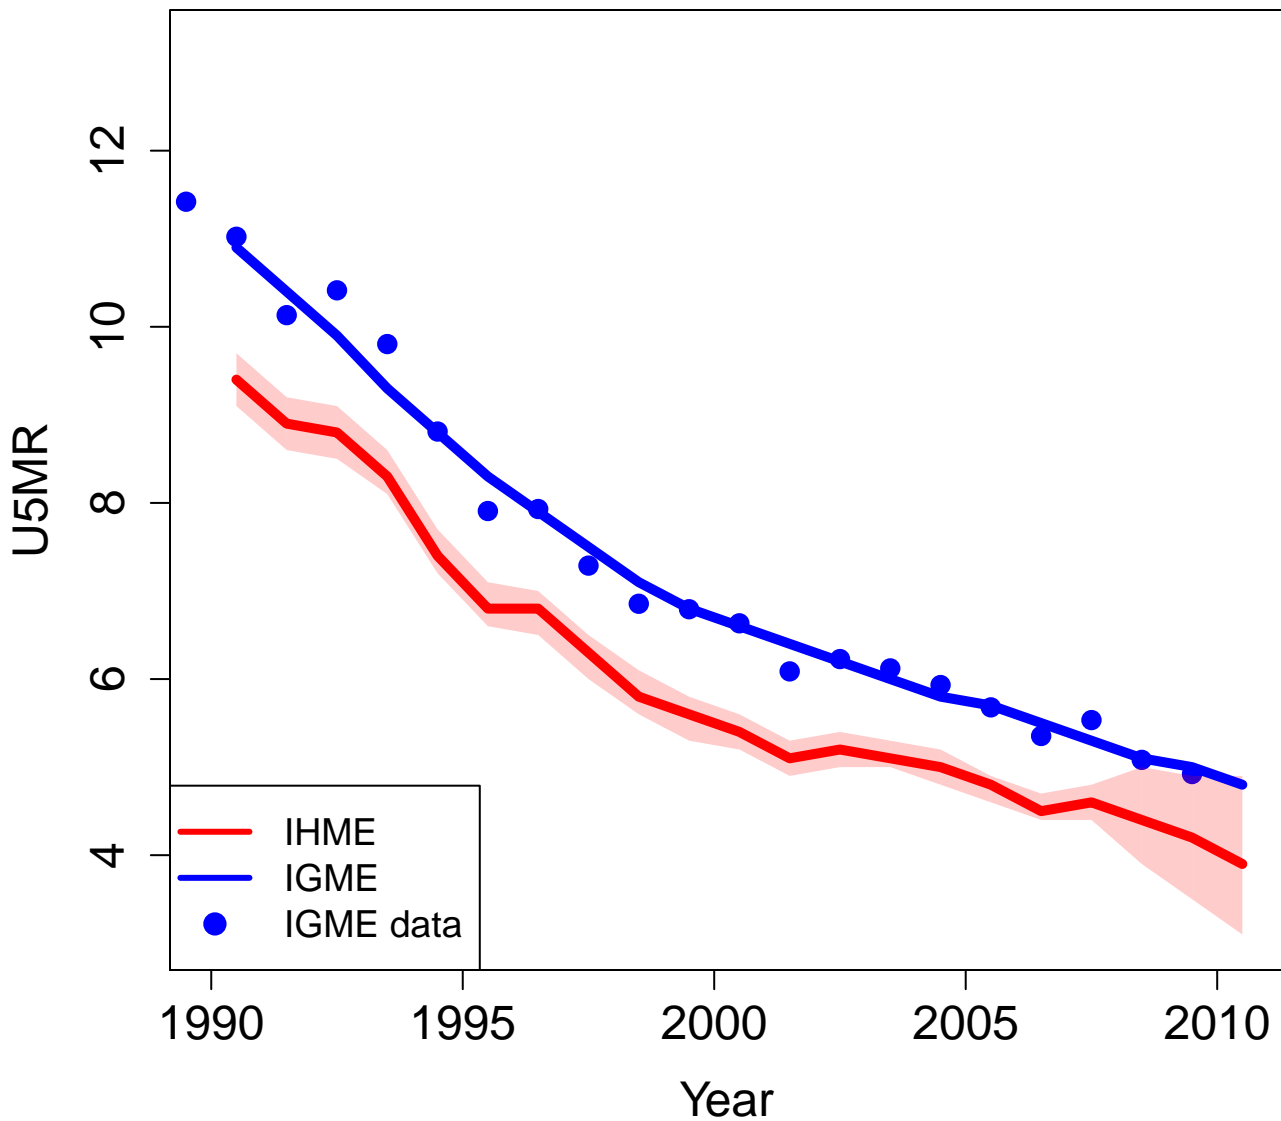

# Sri Lanka

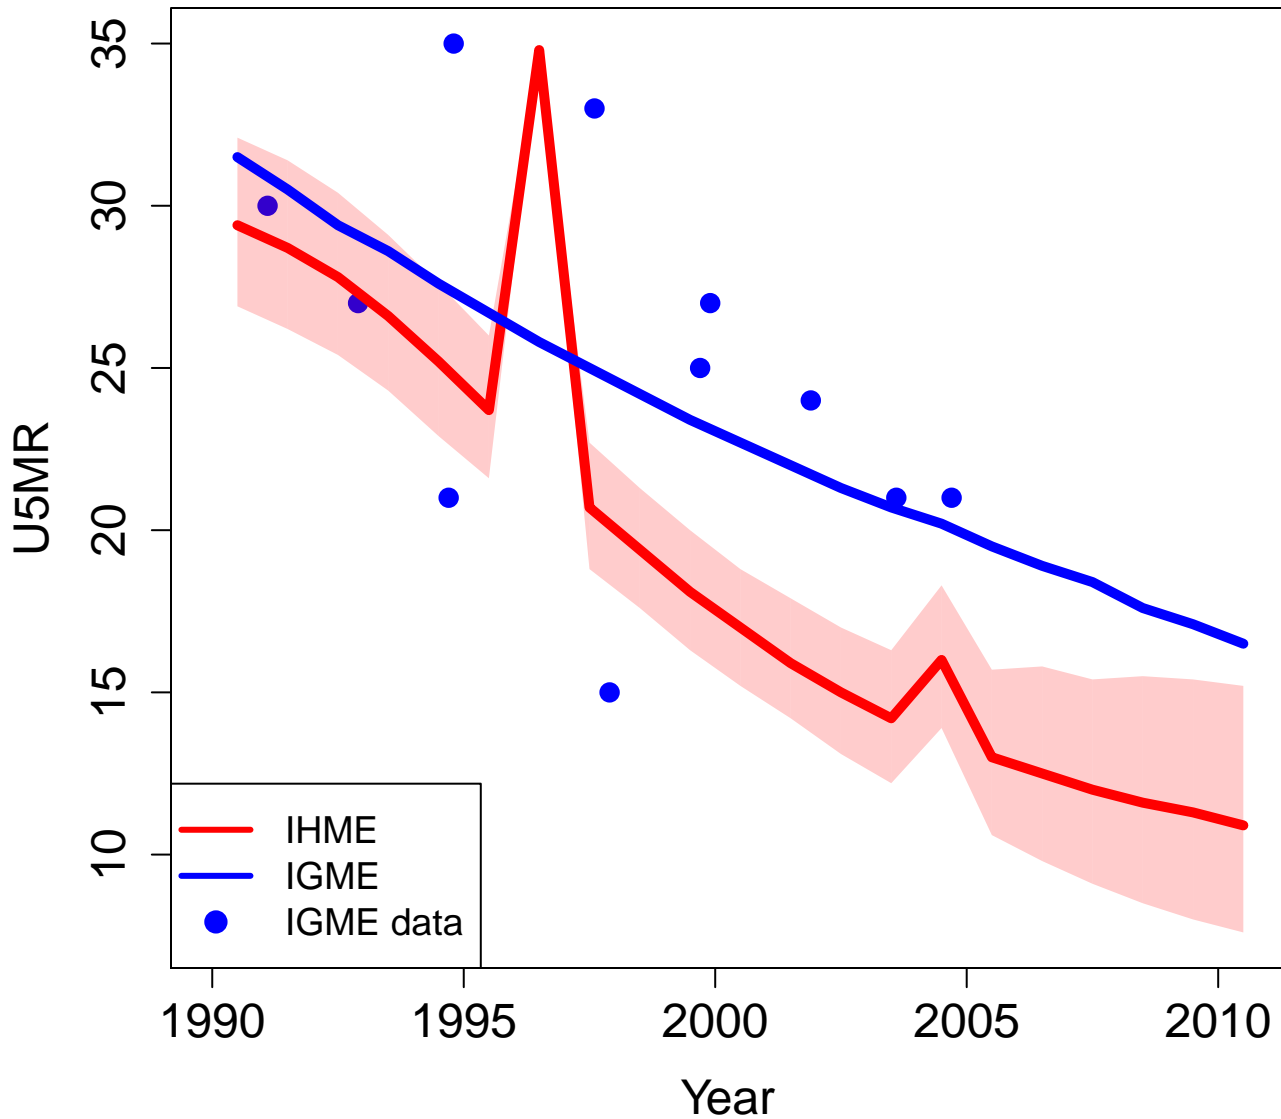

# Sudan

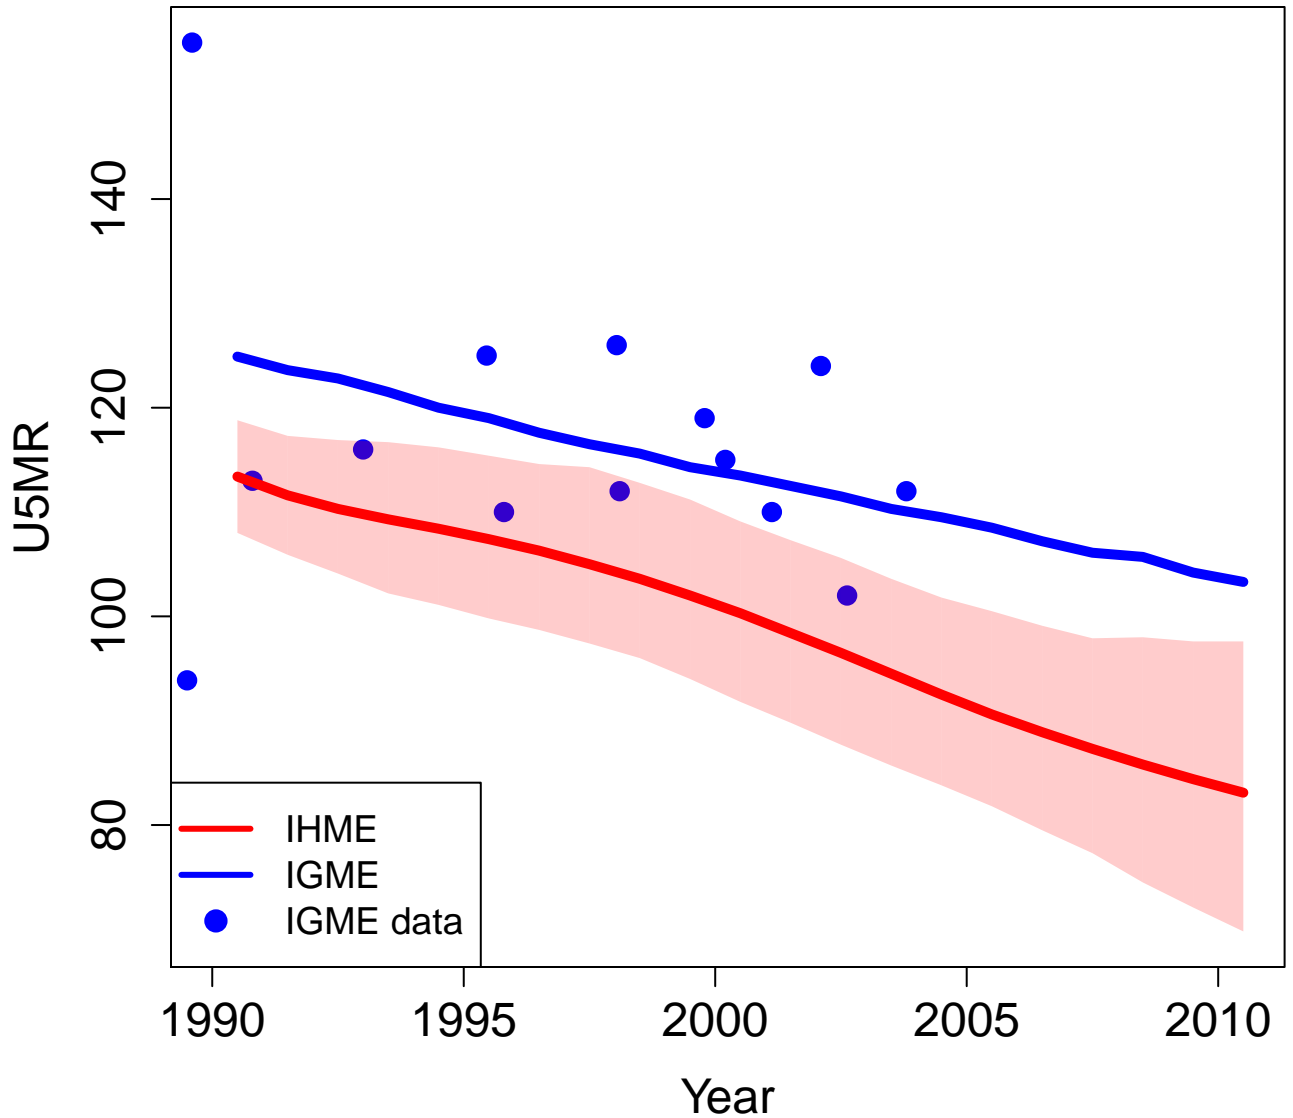

# Suriname

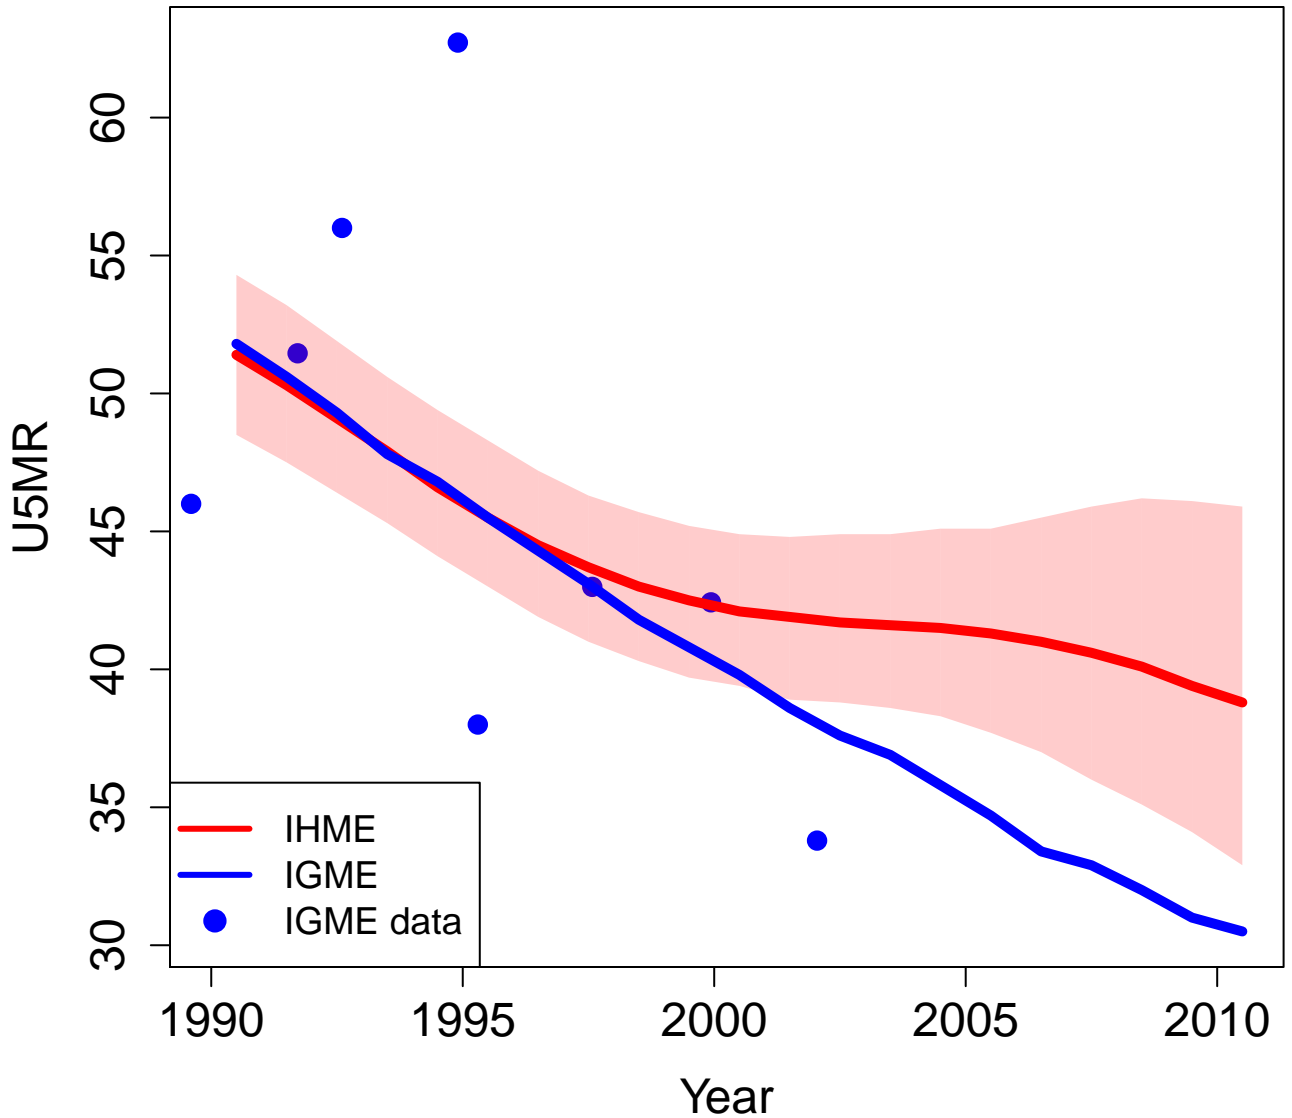

# Swaziland

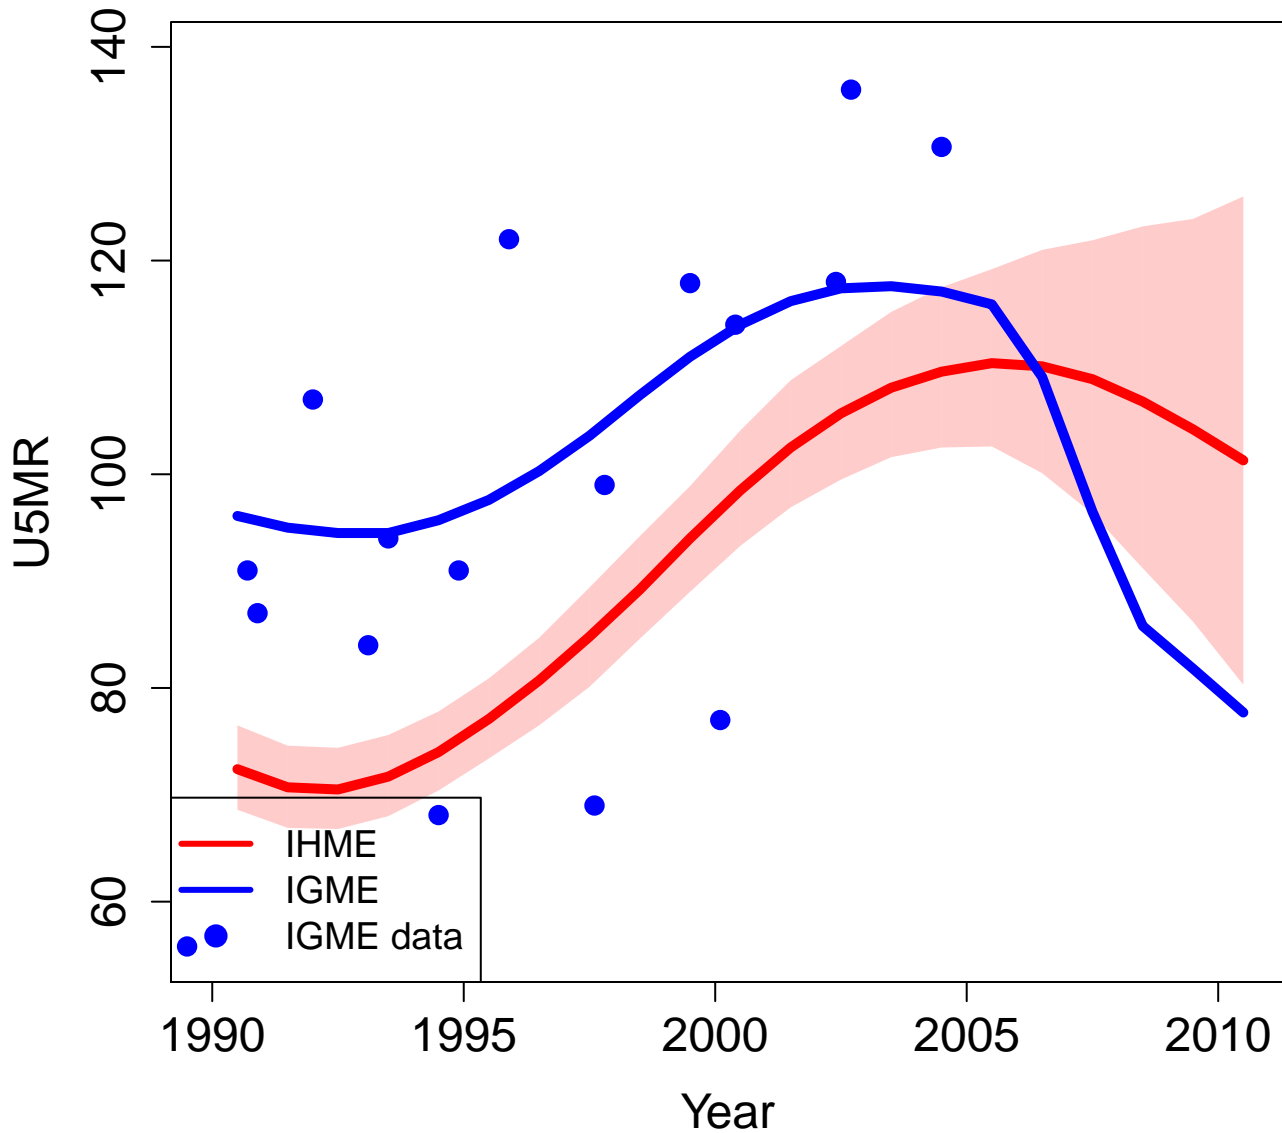

# Sweden

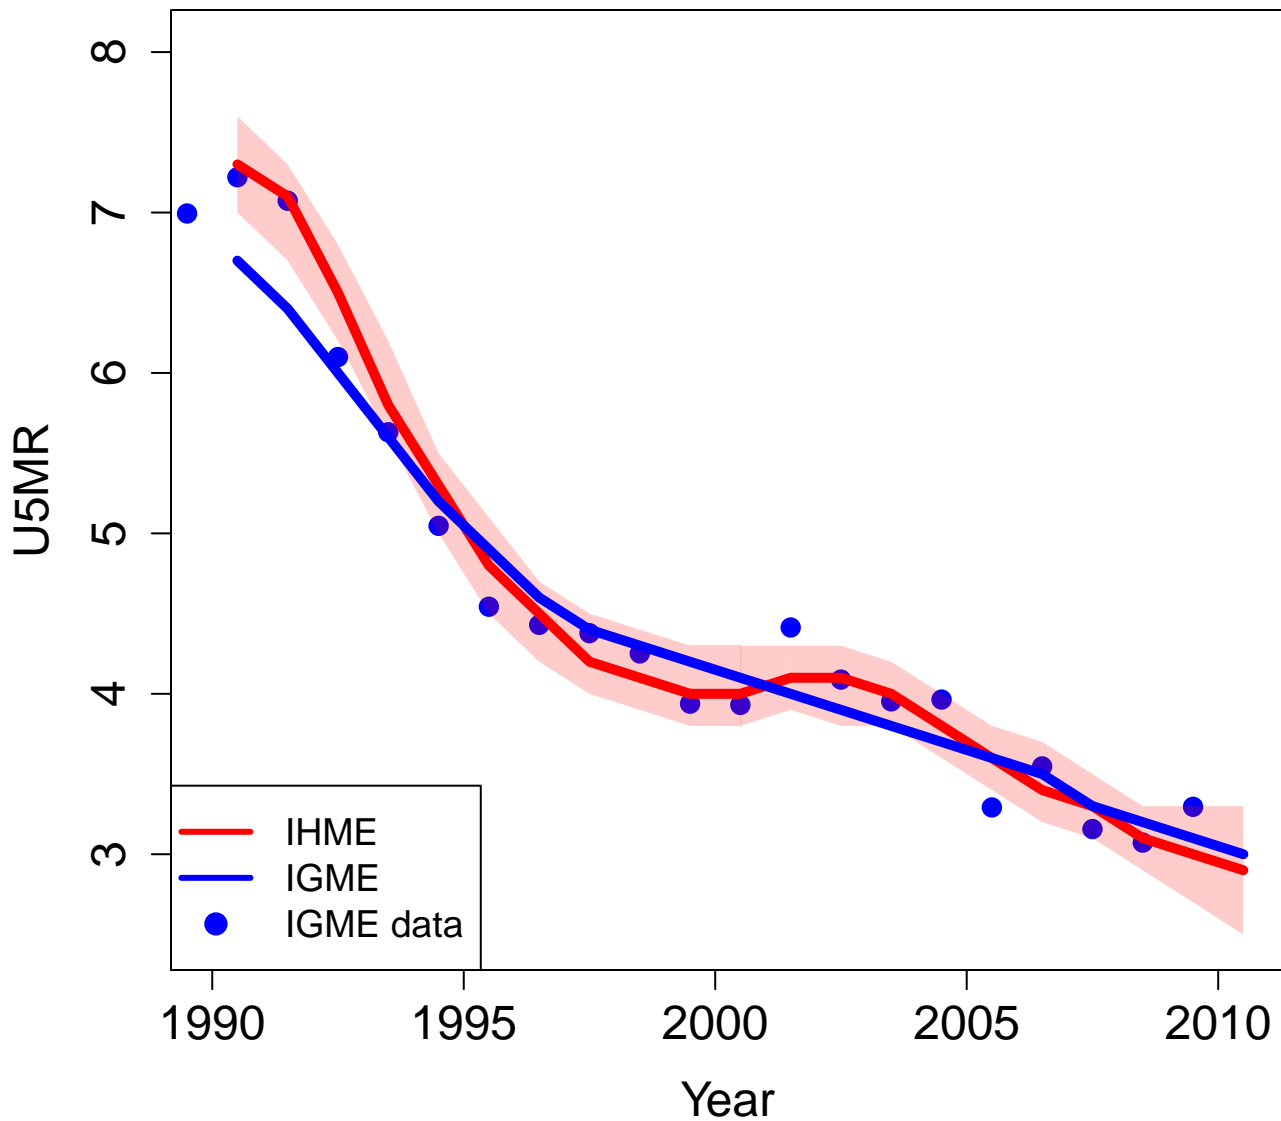



# Switzerland

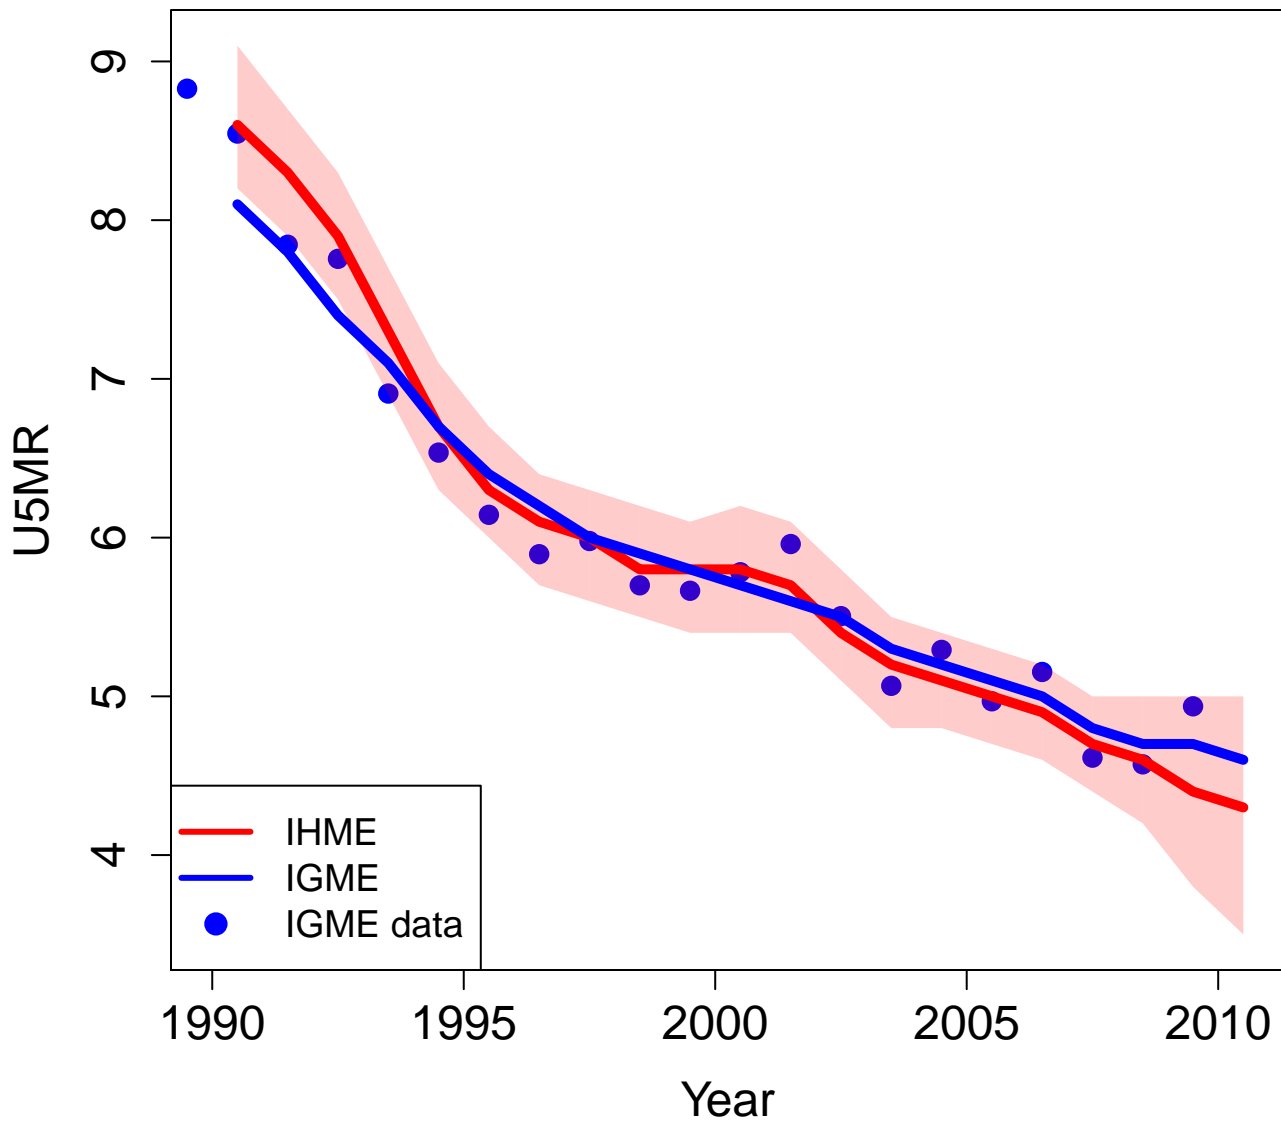

# Syria

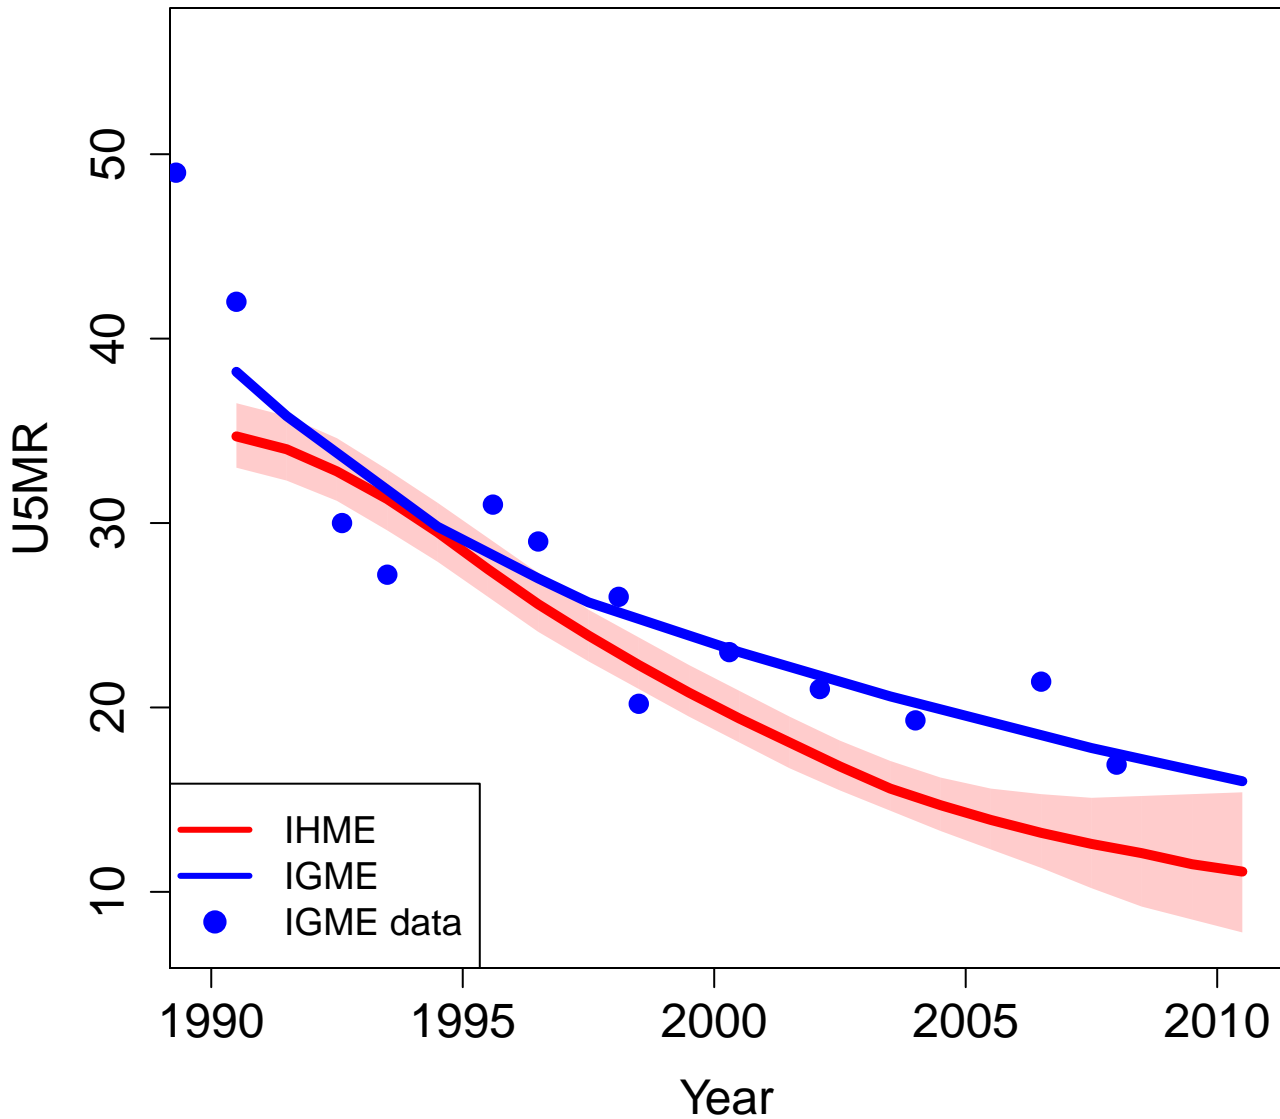

# Tajikistan

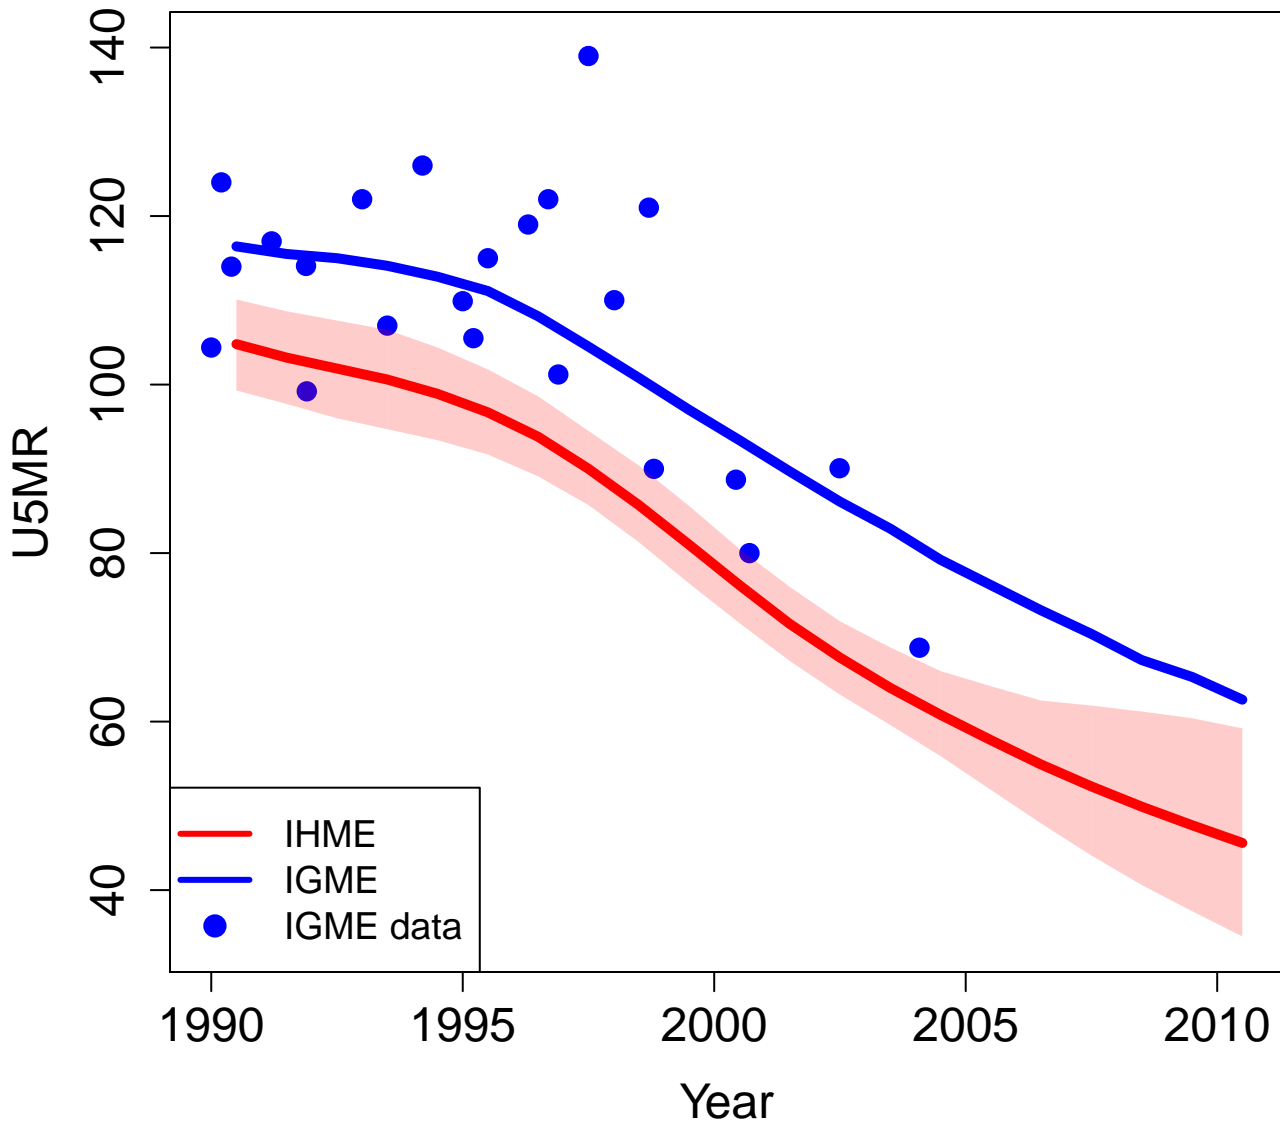

# Macedonia

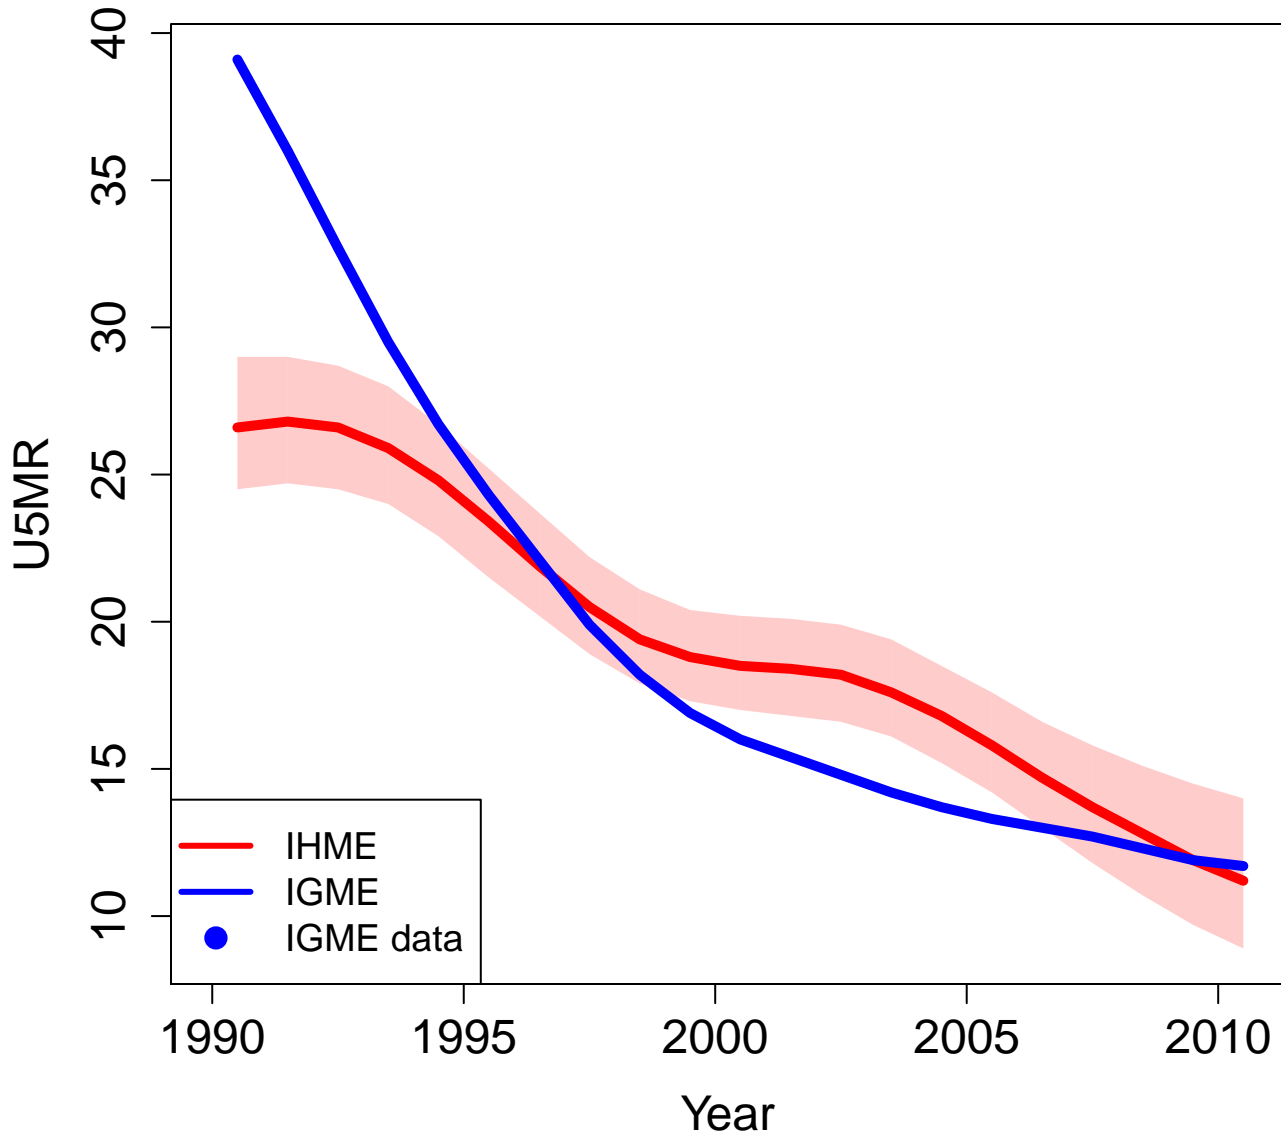

# Thailand

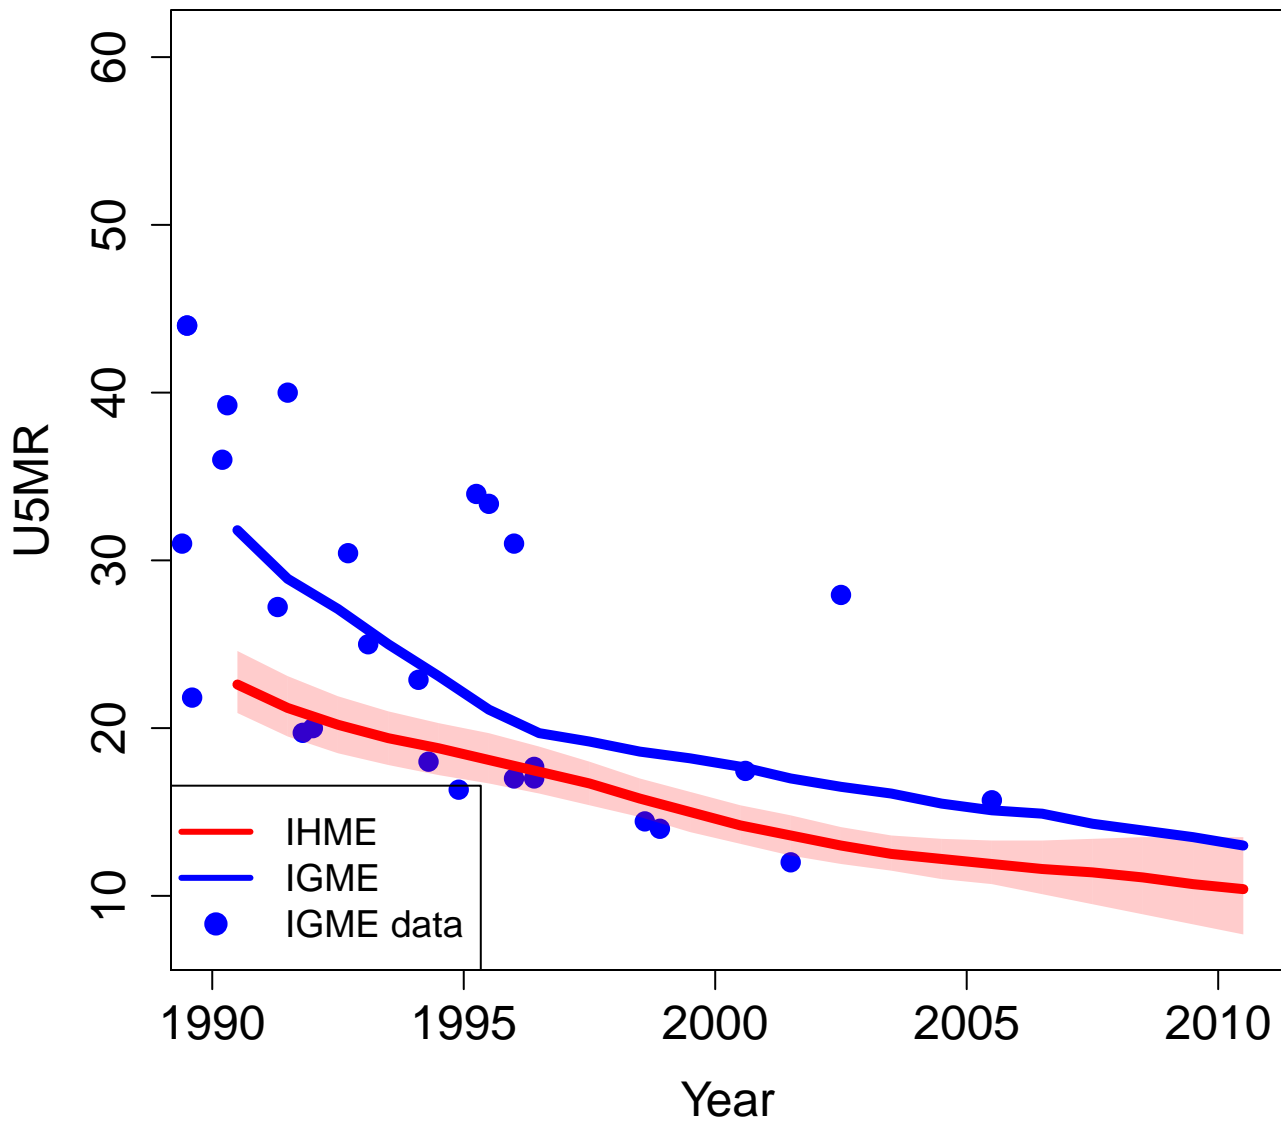

# Timor-Leste

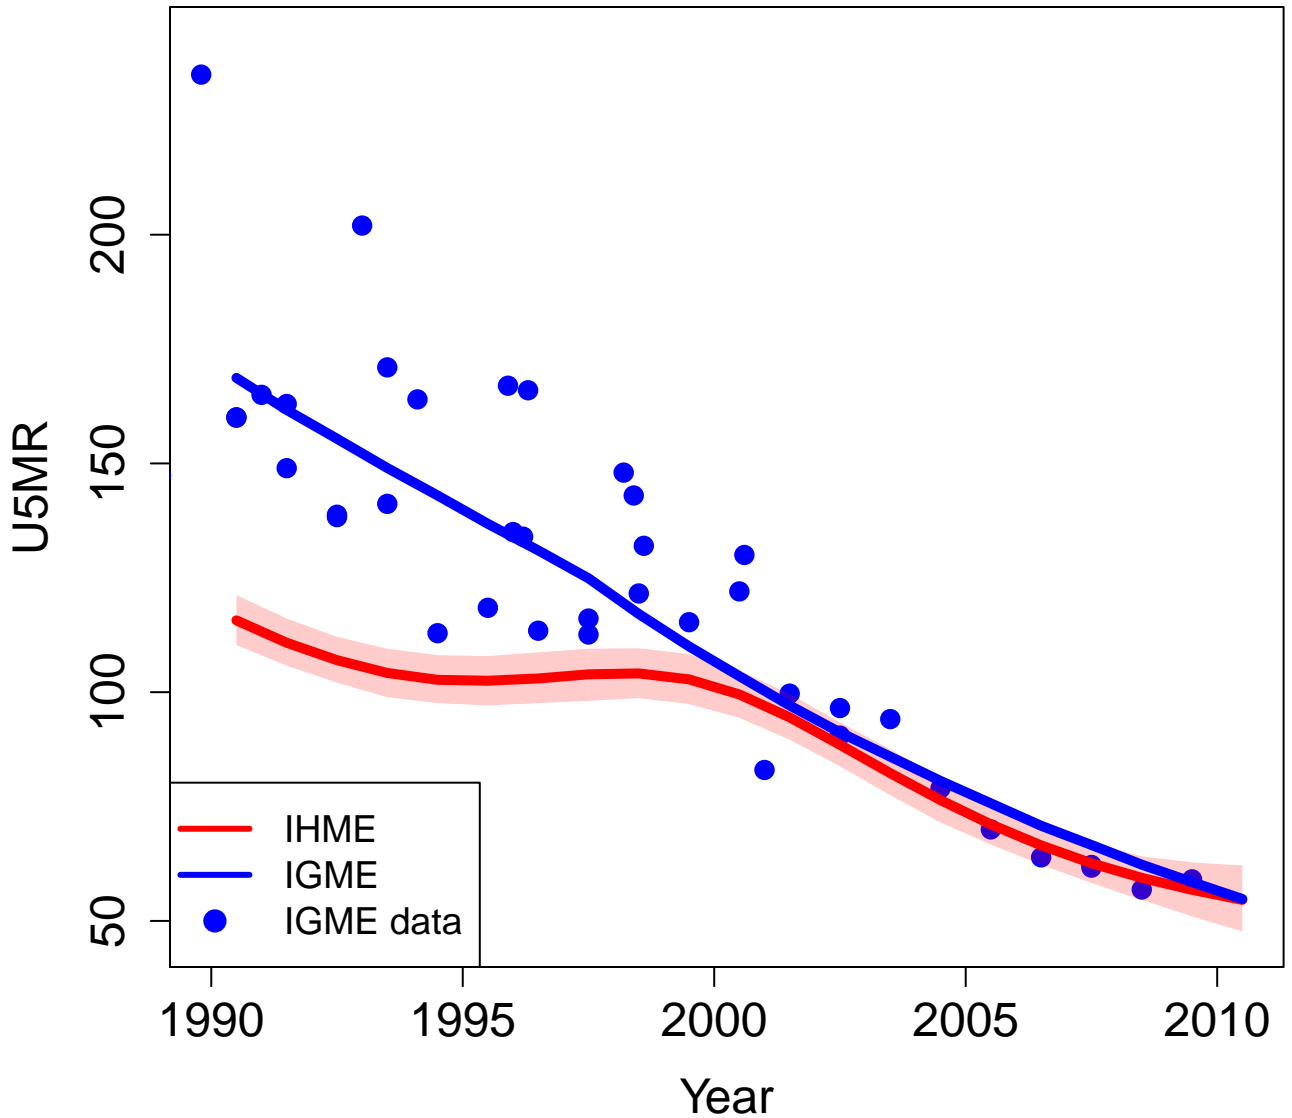

# Togo

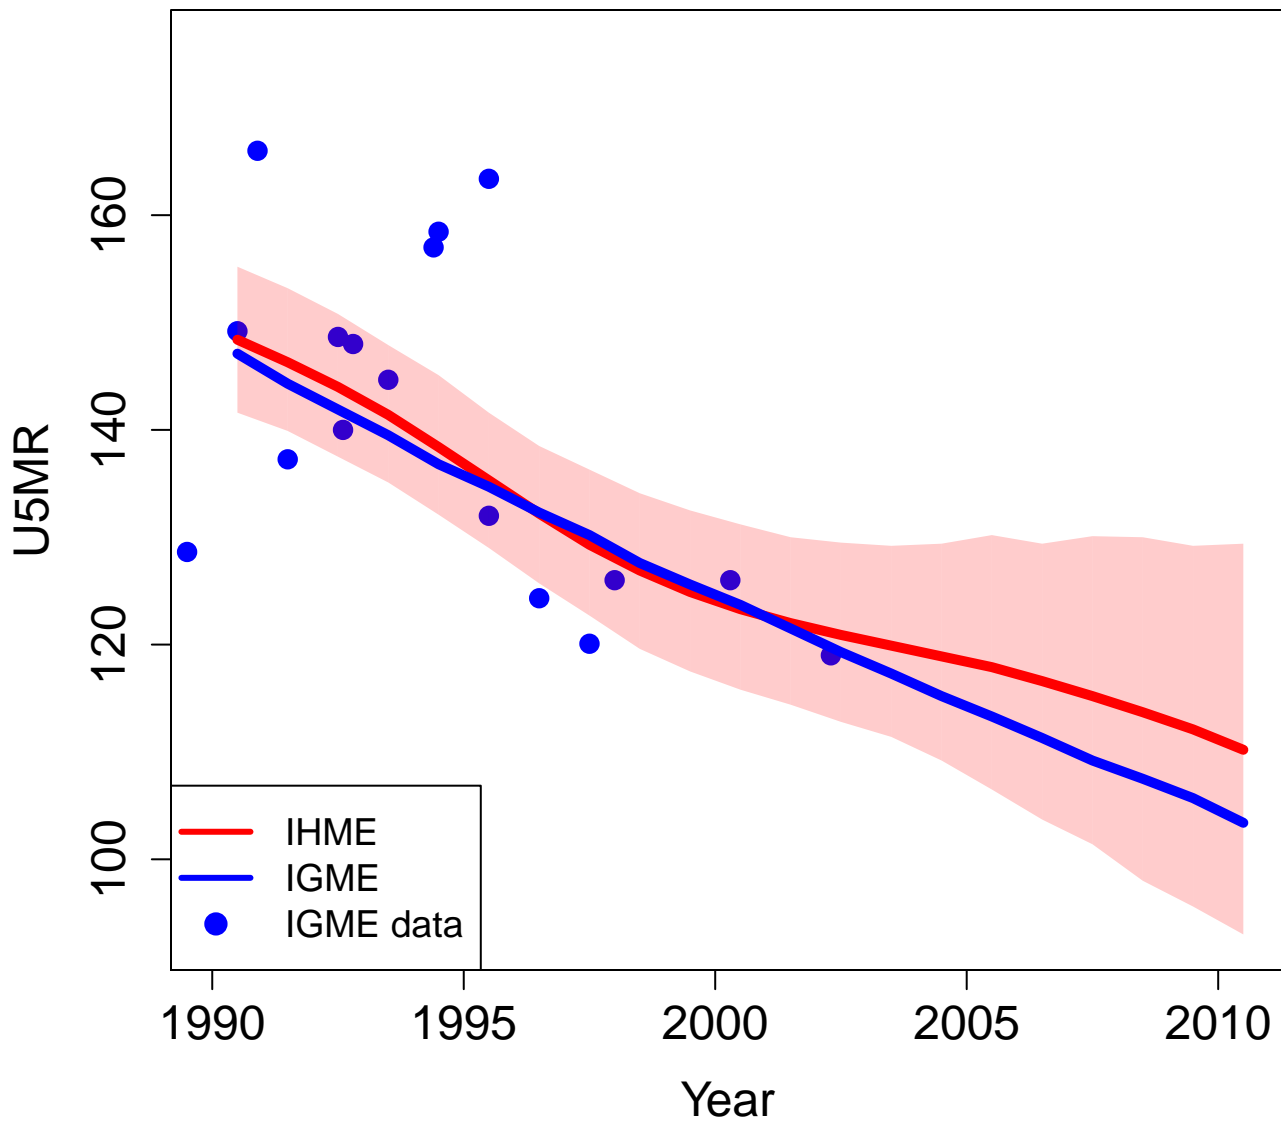

# Tonga

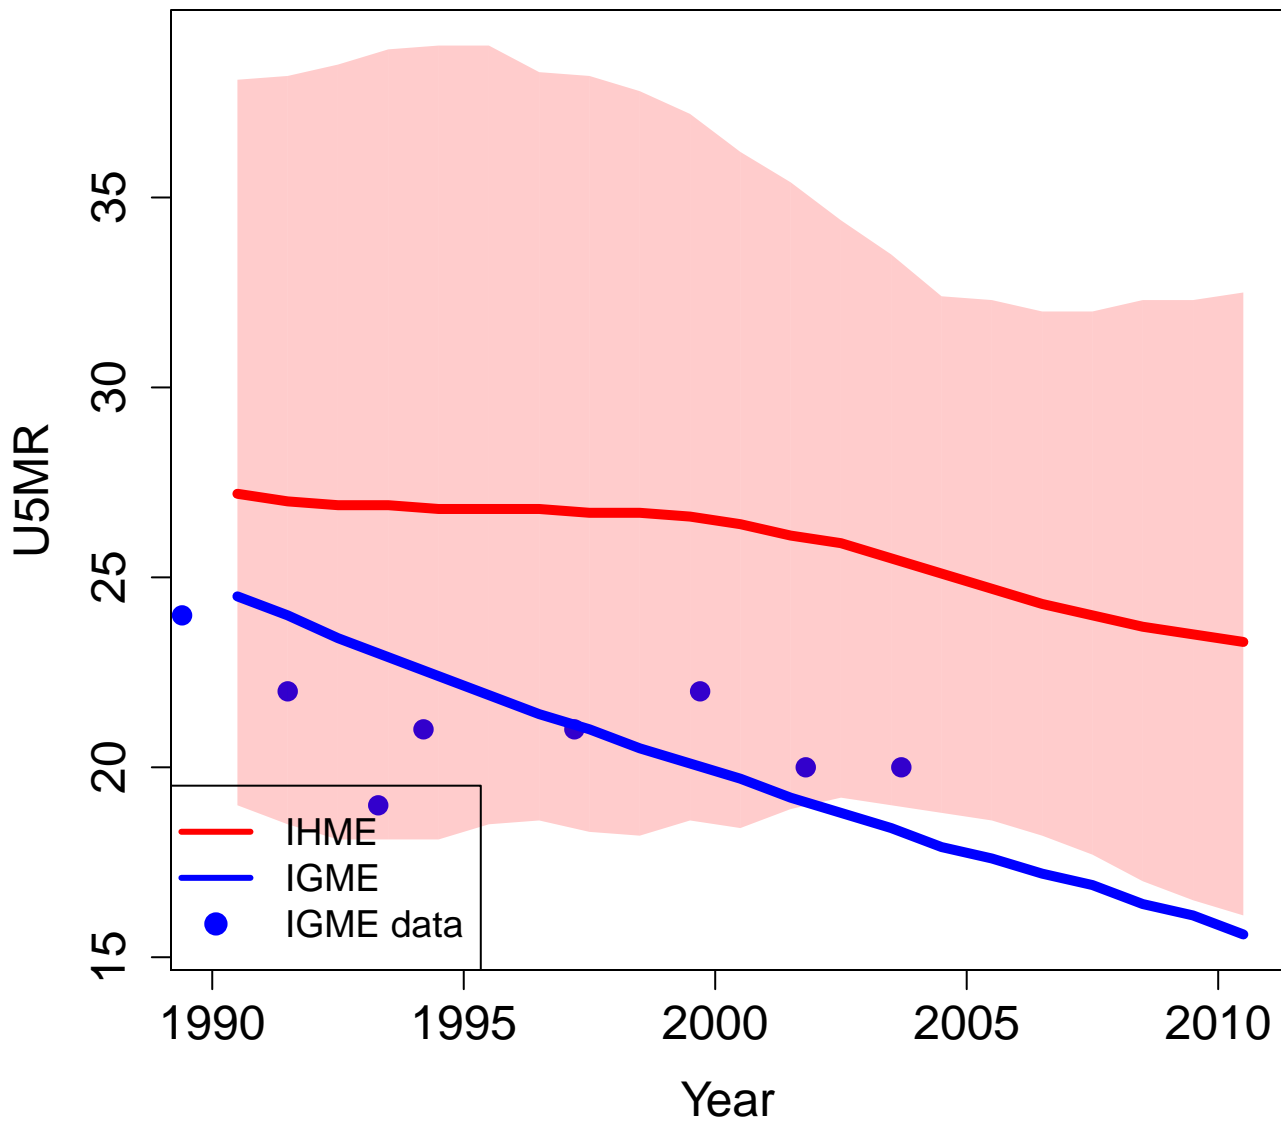



# Trinidad&T

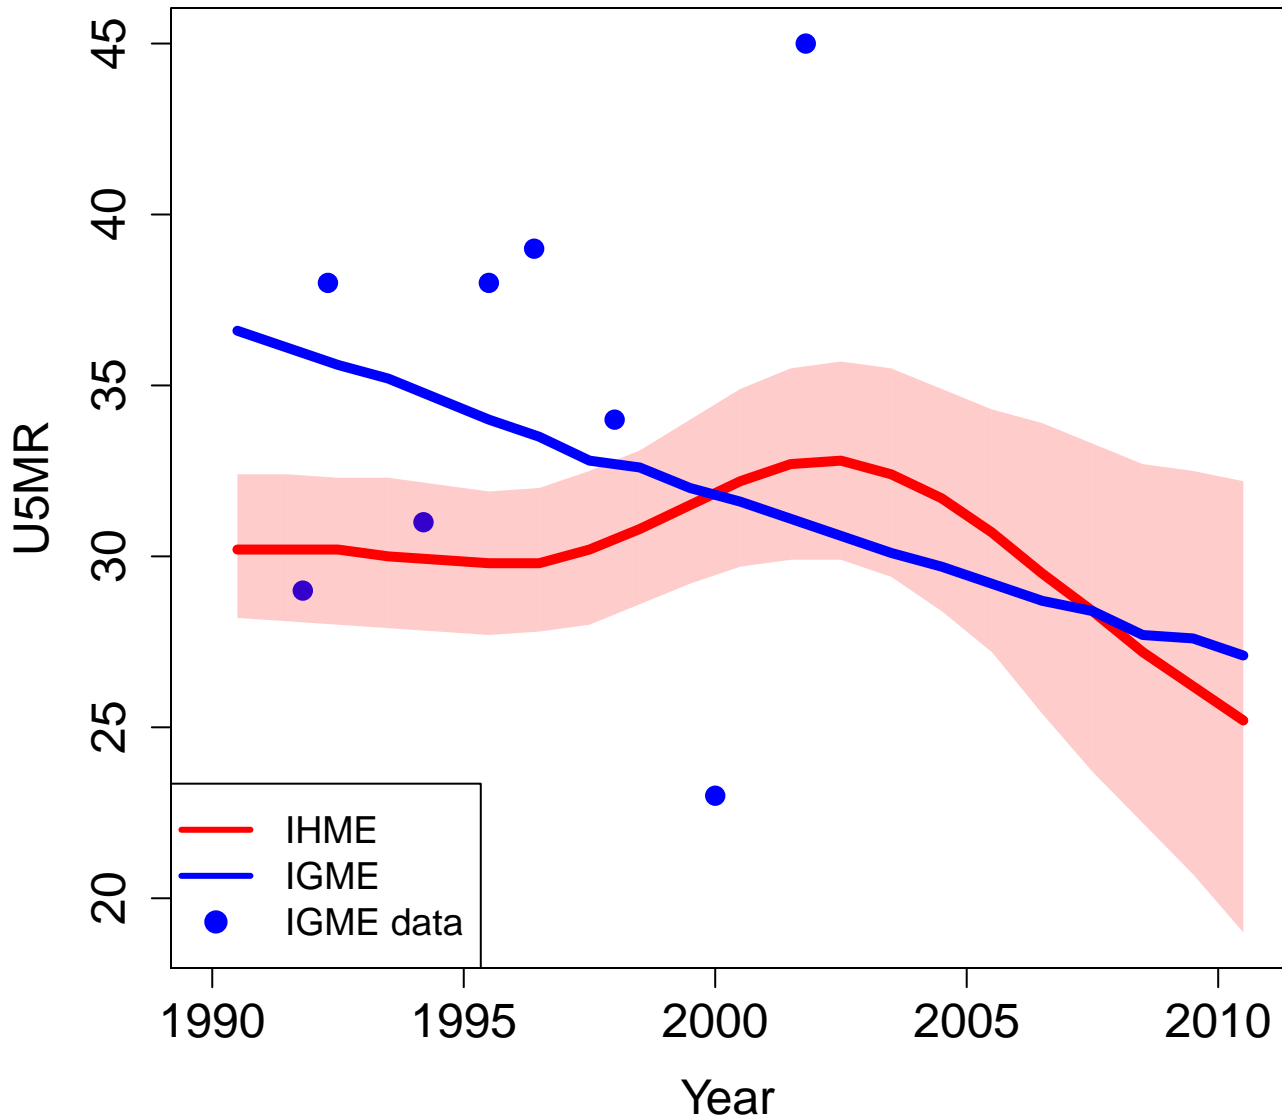

# Tunisia

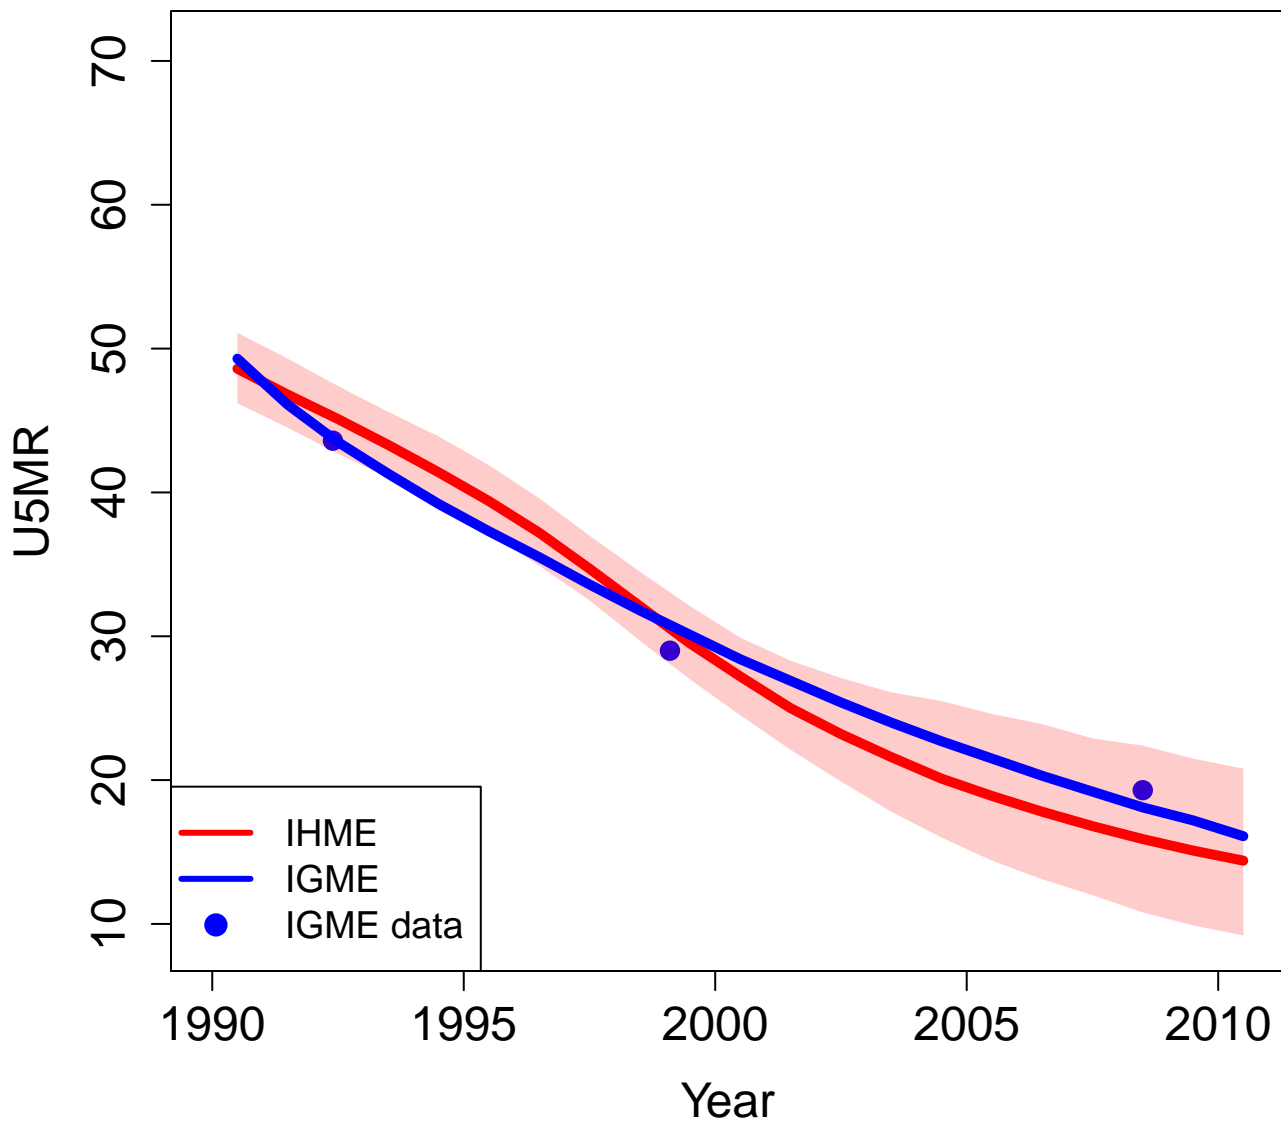

# Turkey

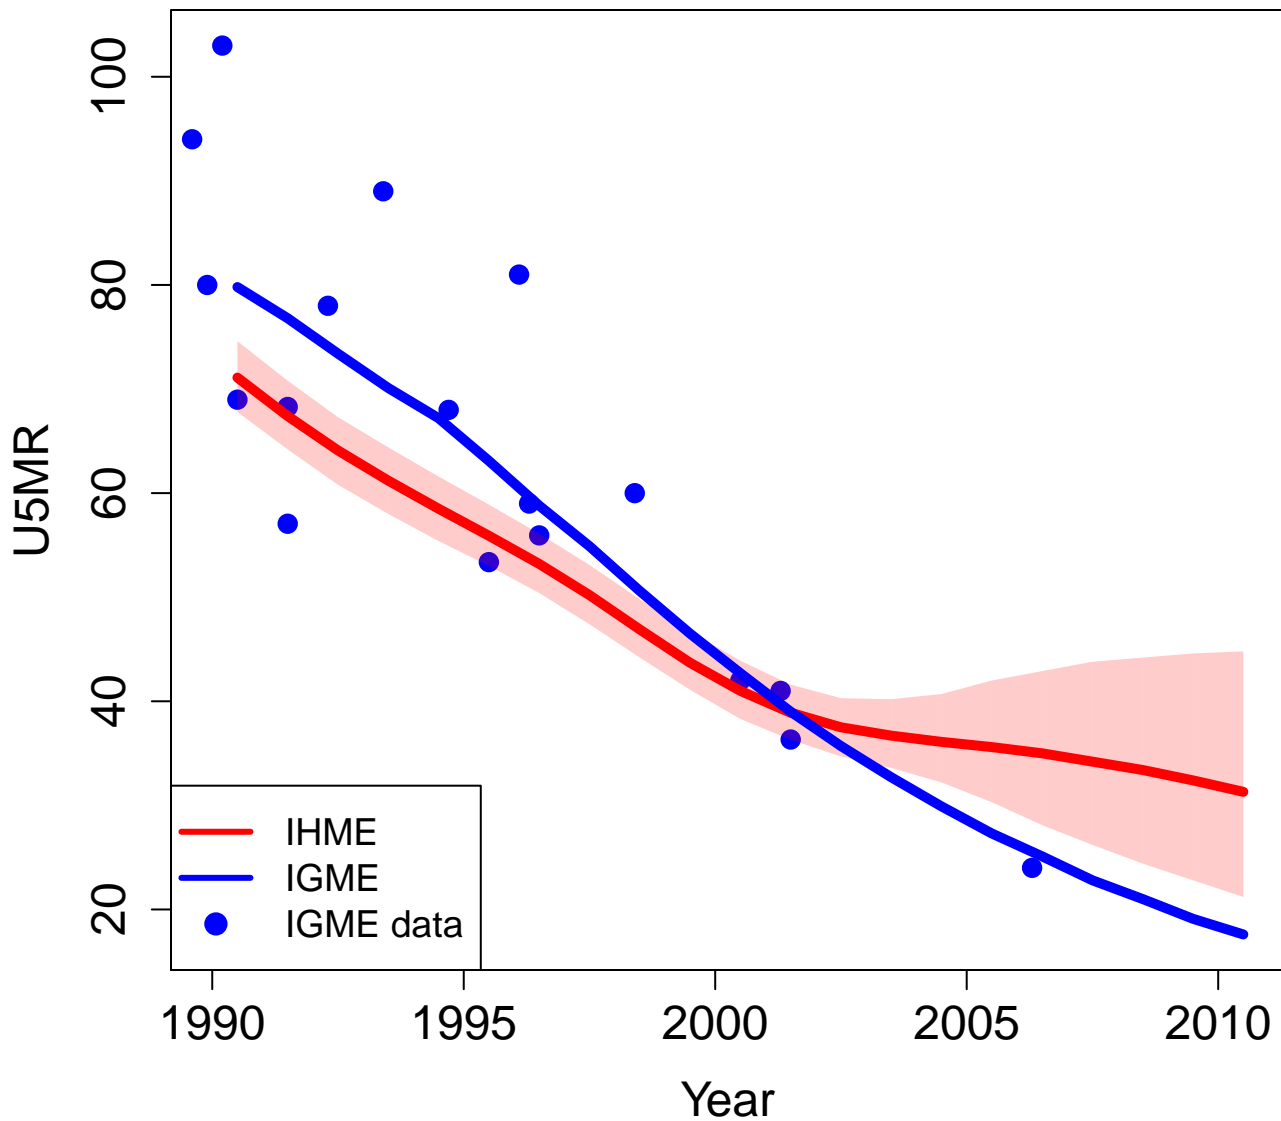

# Turkmenistan

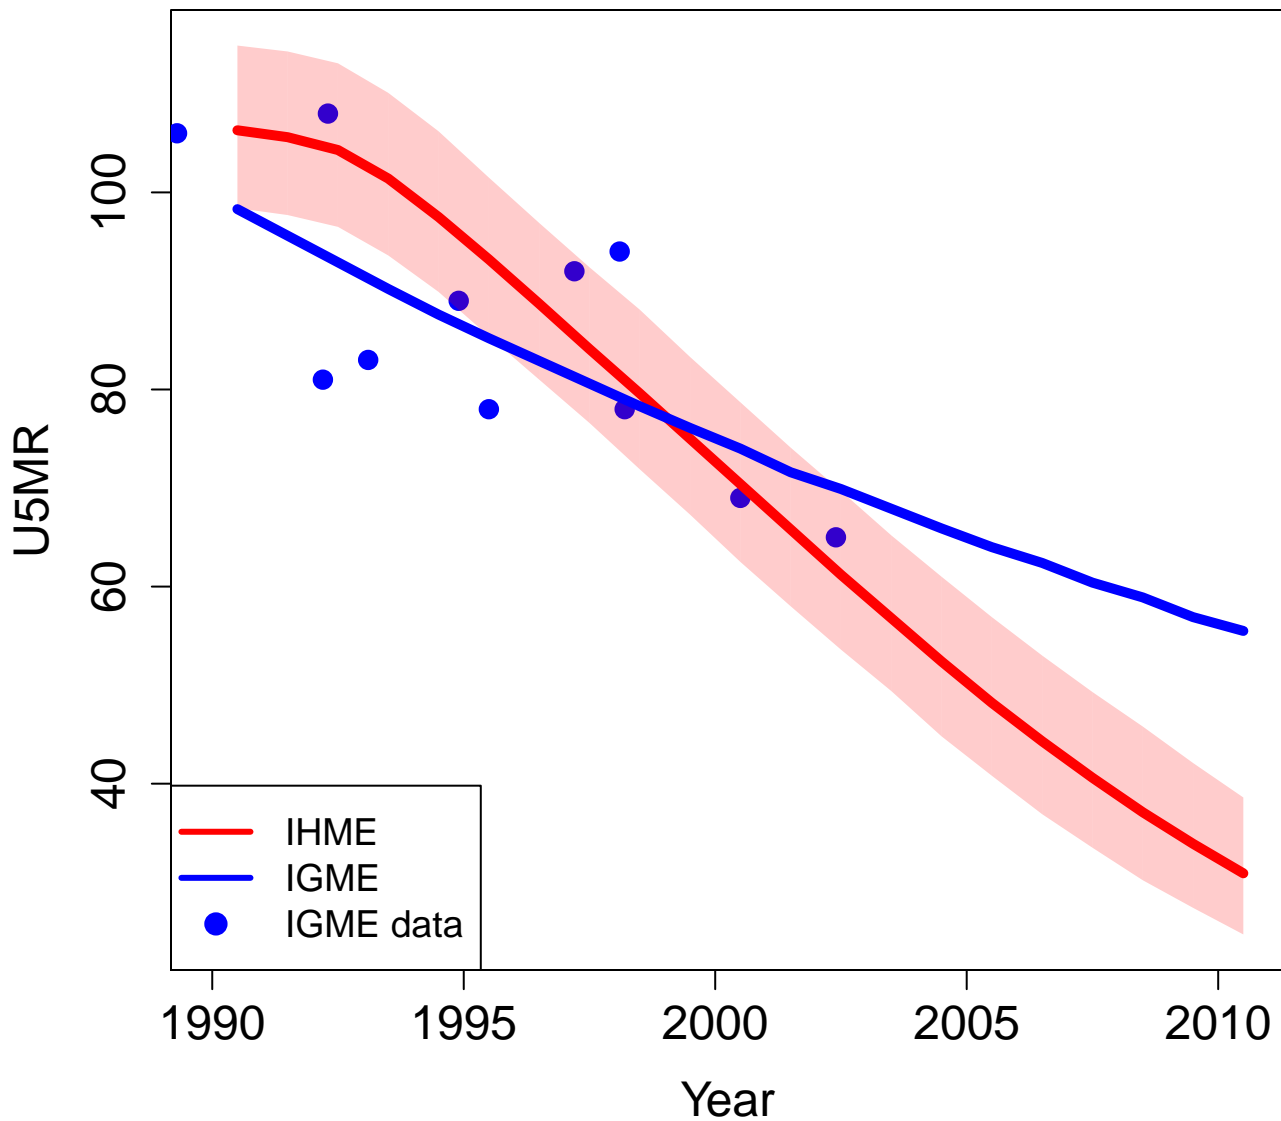

# Uganda

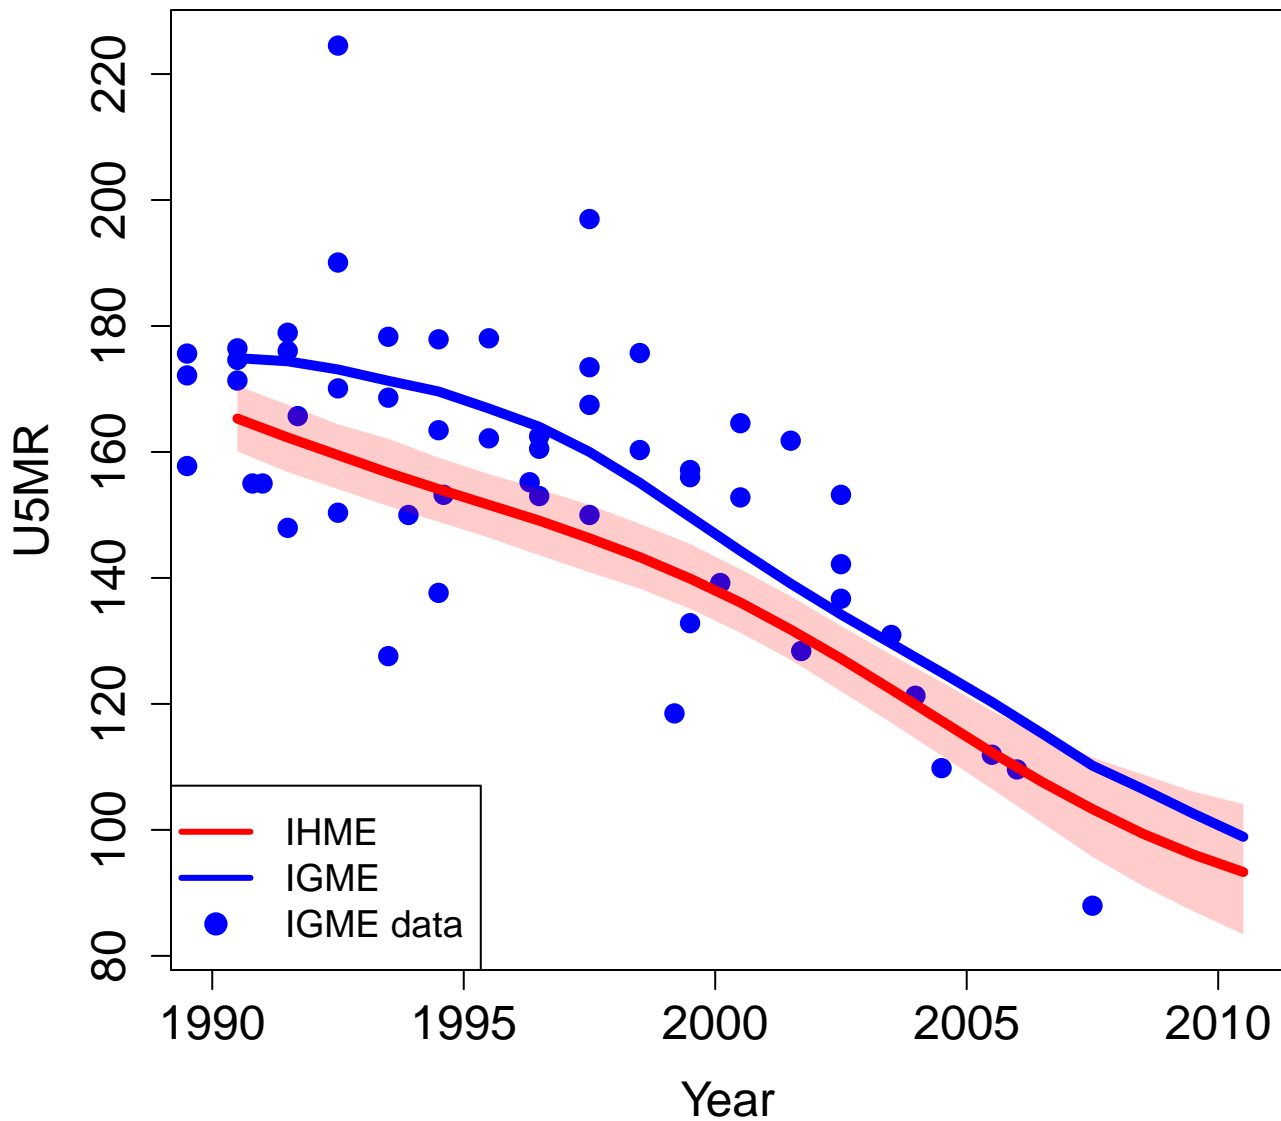



# Arab Emirates

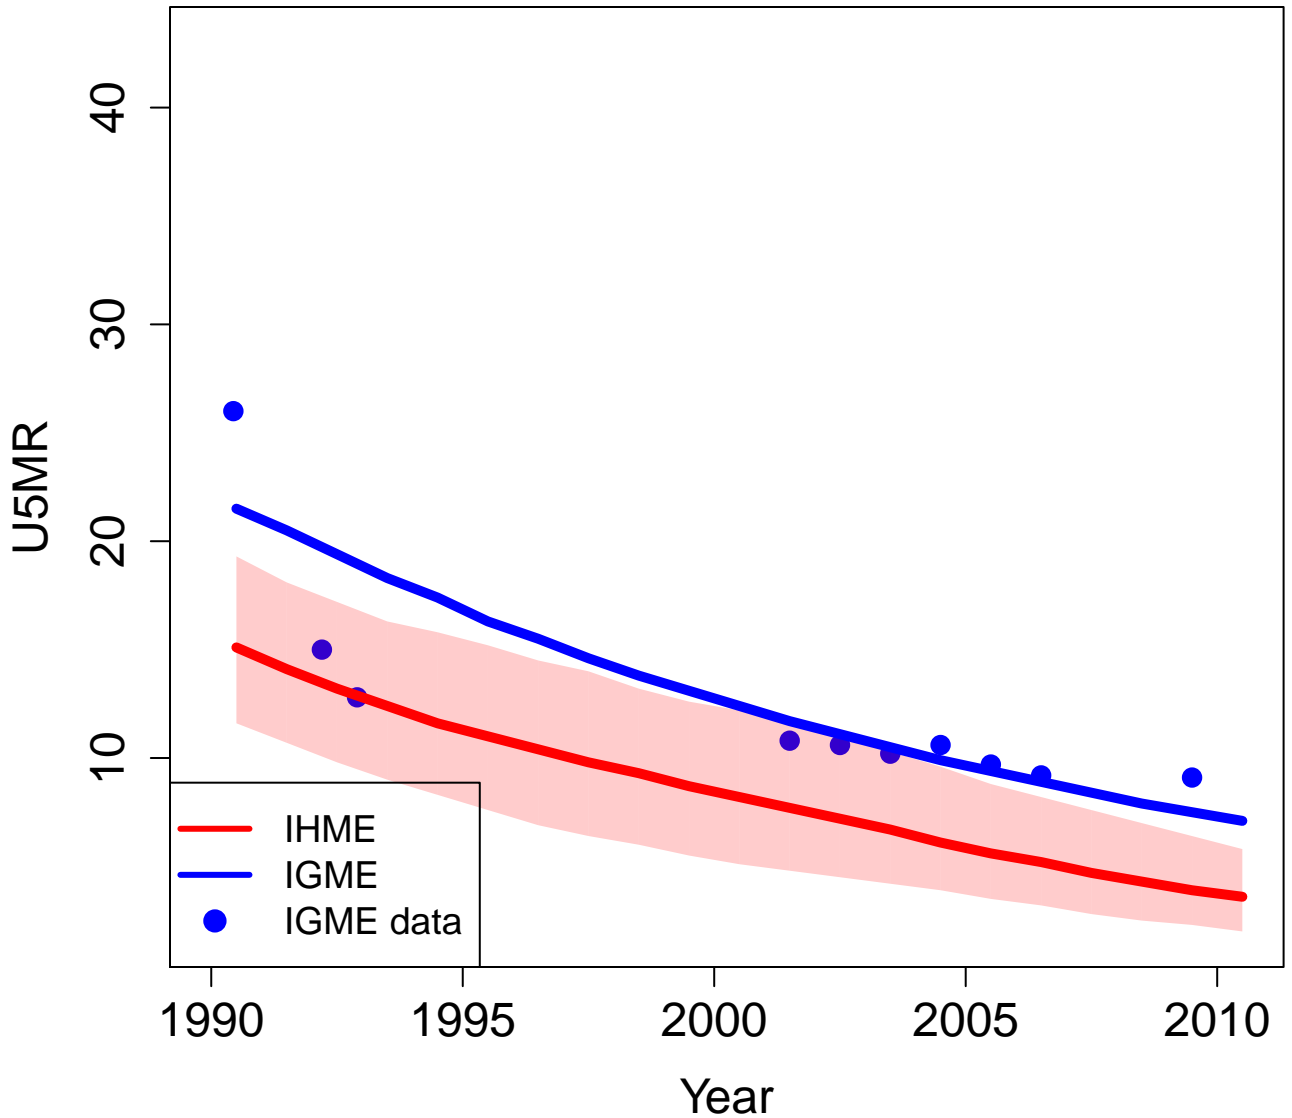

# U.K.

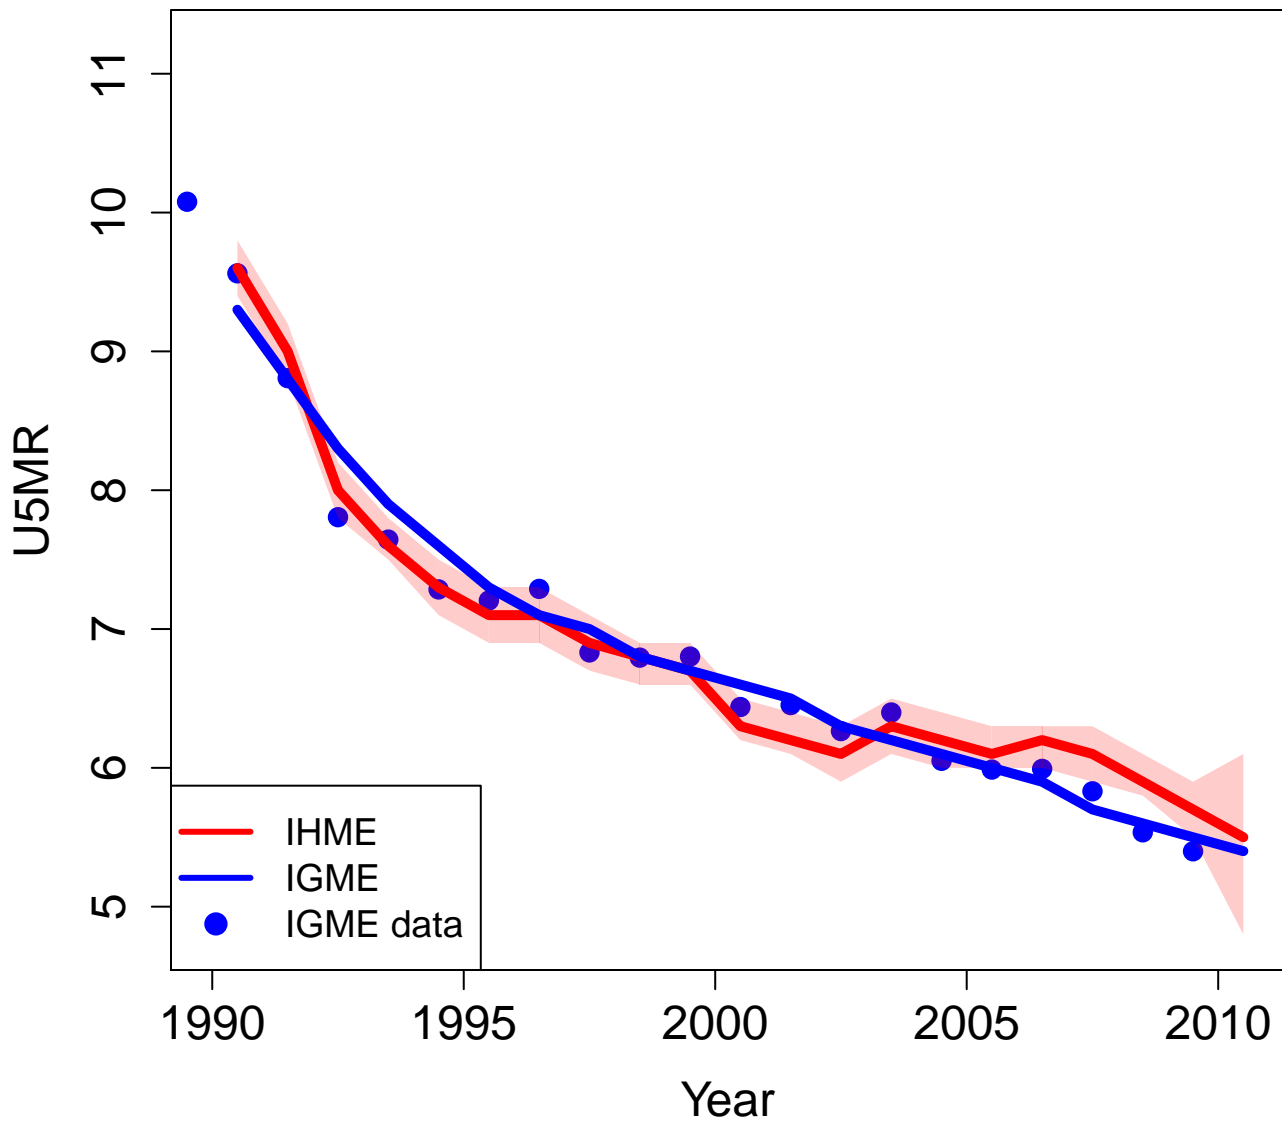



# Tanzania

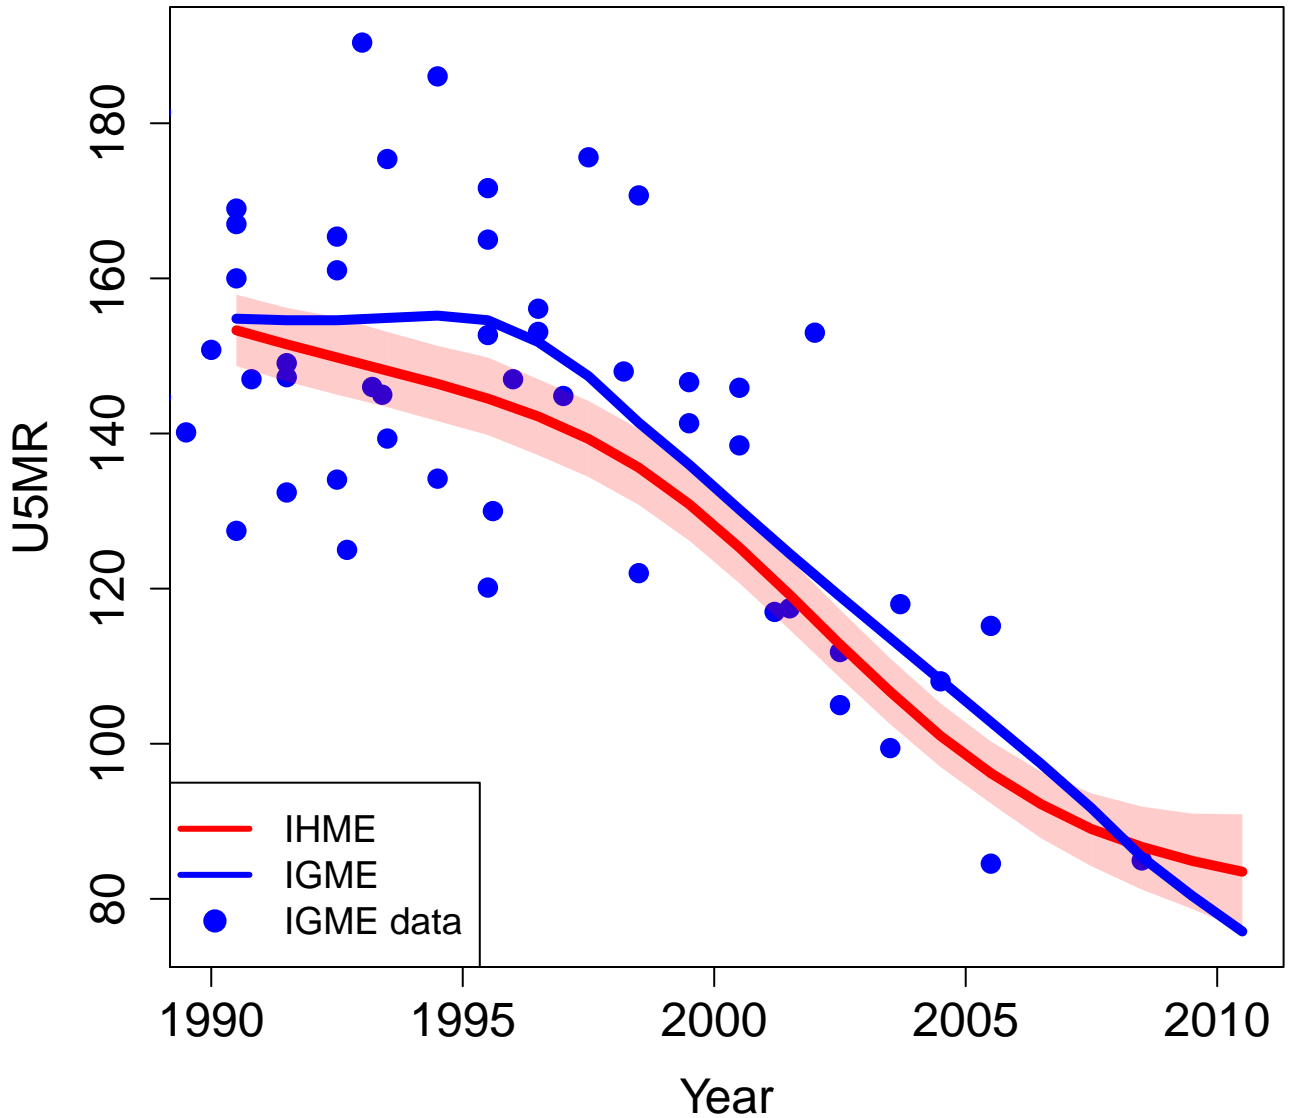

# U.S.

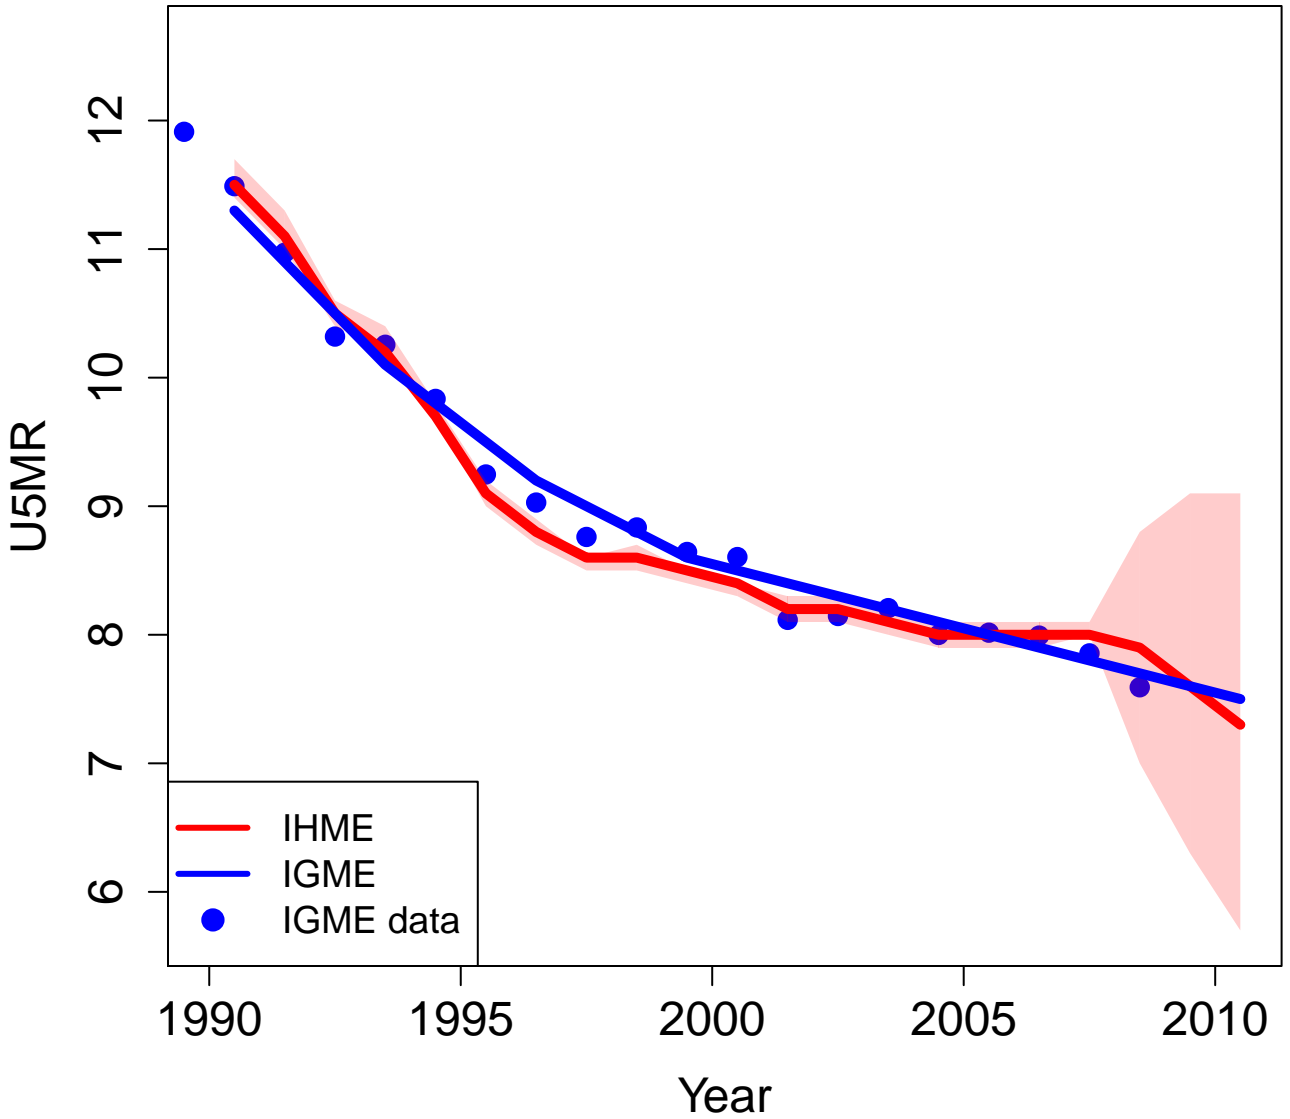

# Uruguay

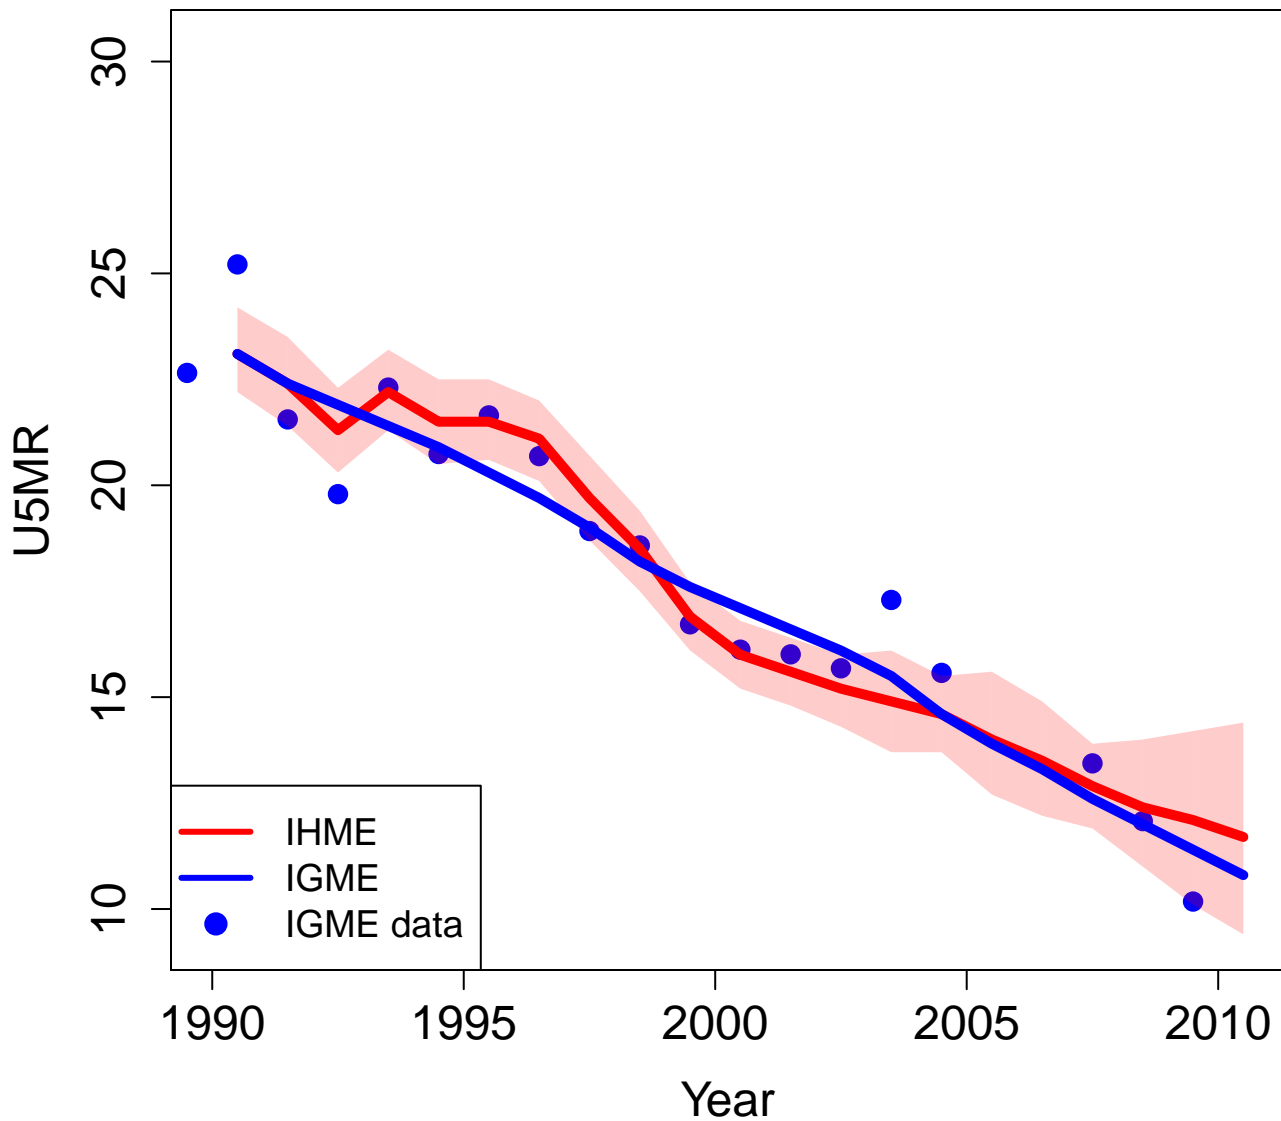

# Uzbekistan

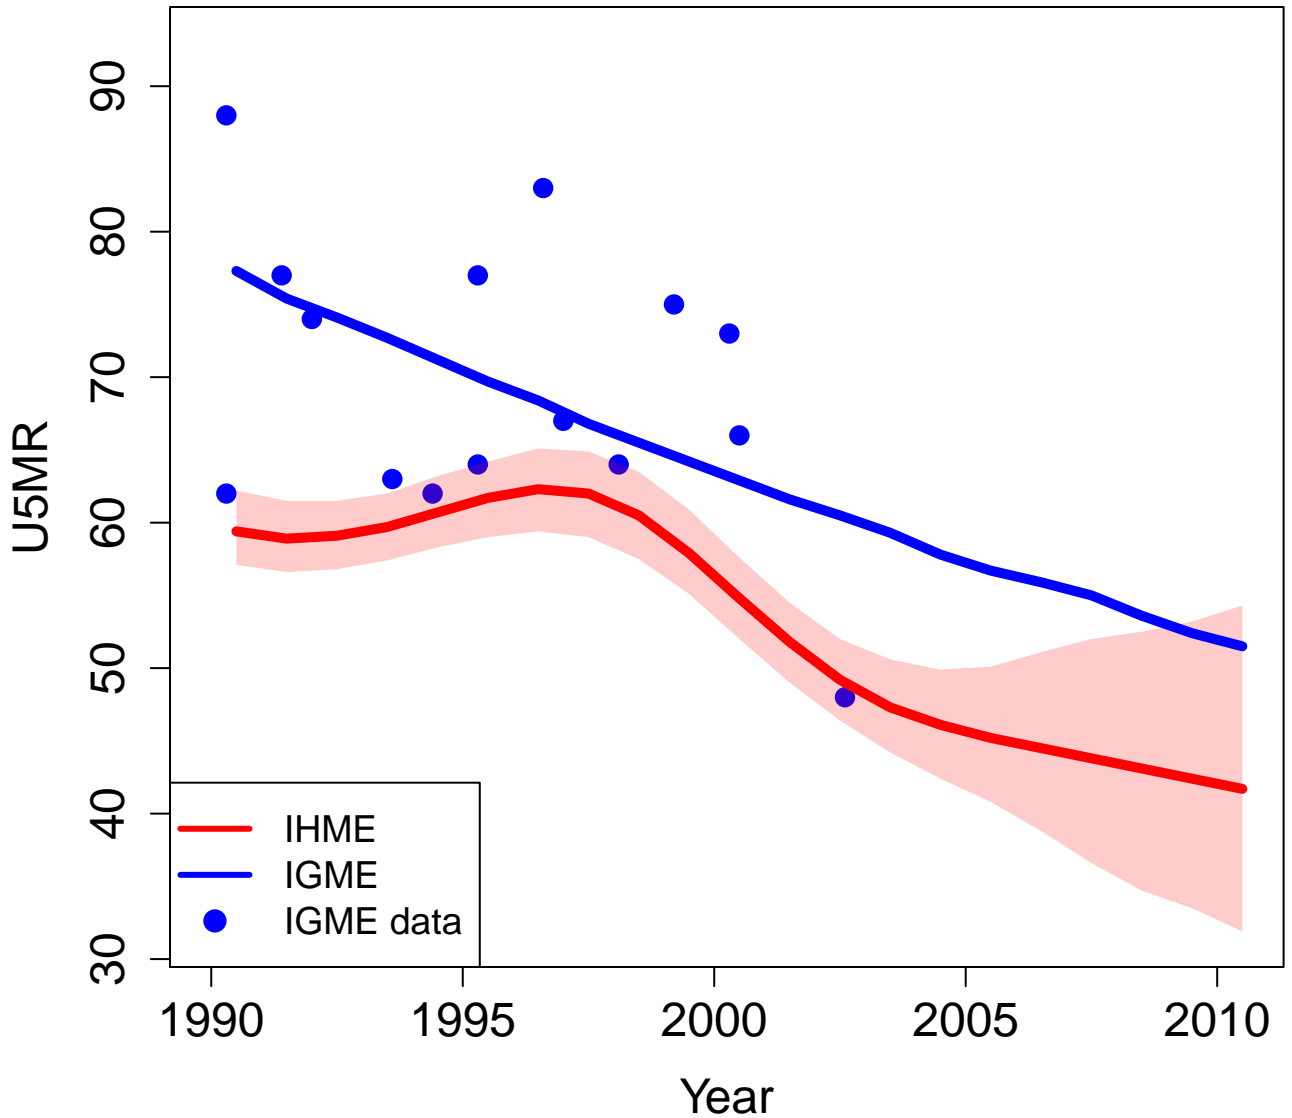

# Vanuatu

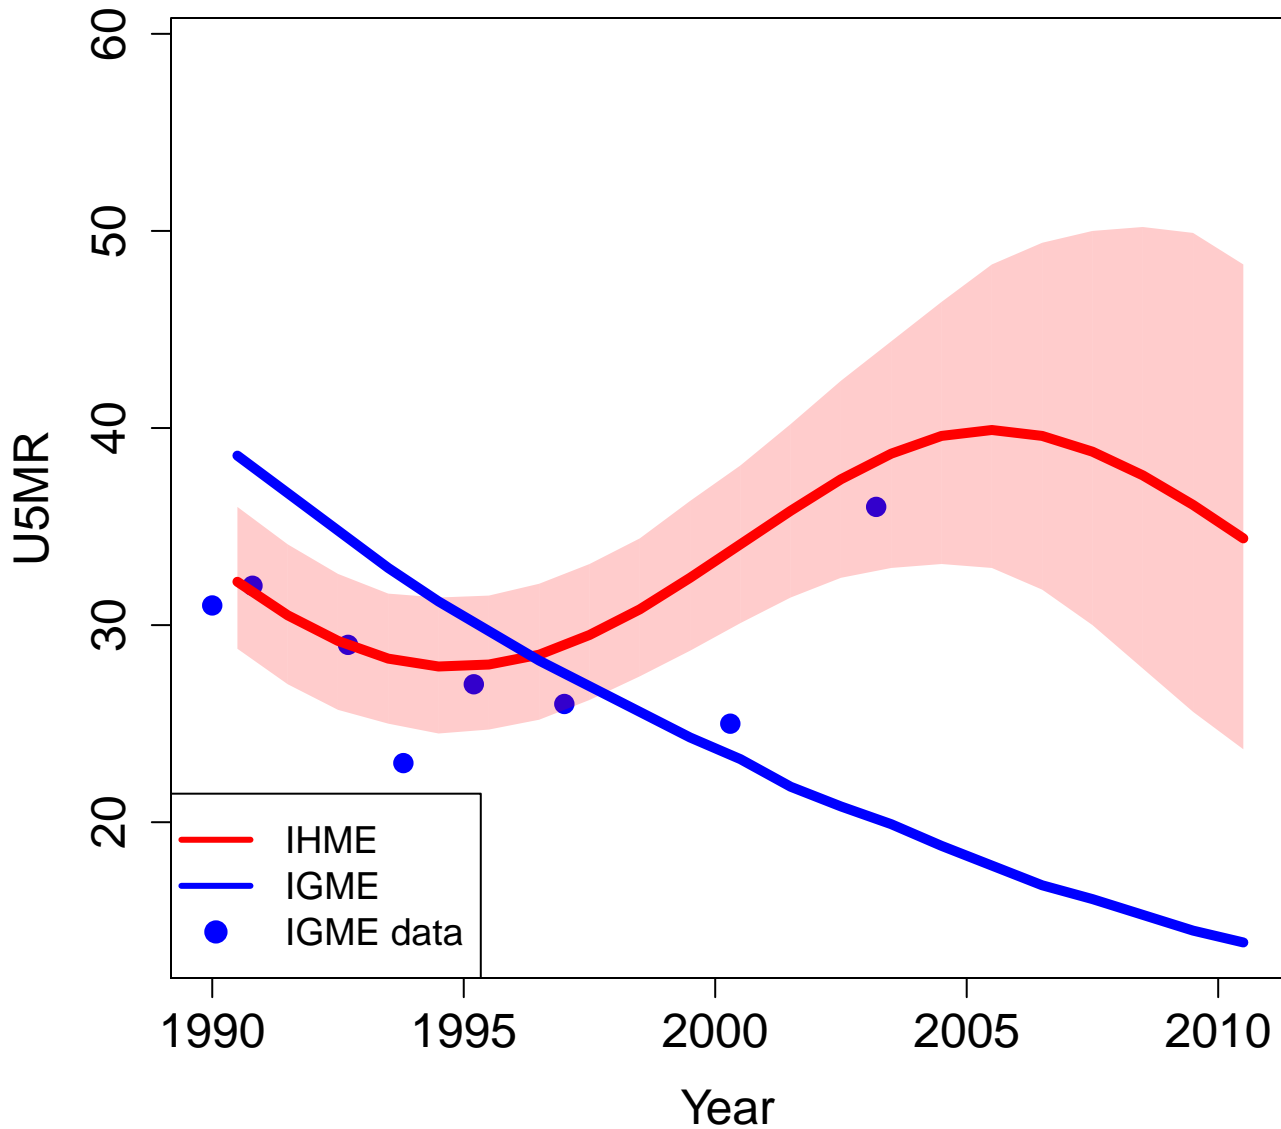

# Venezuela

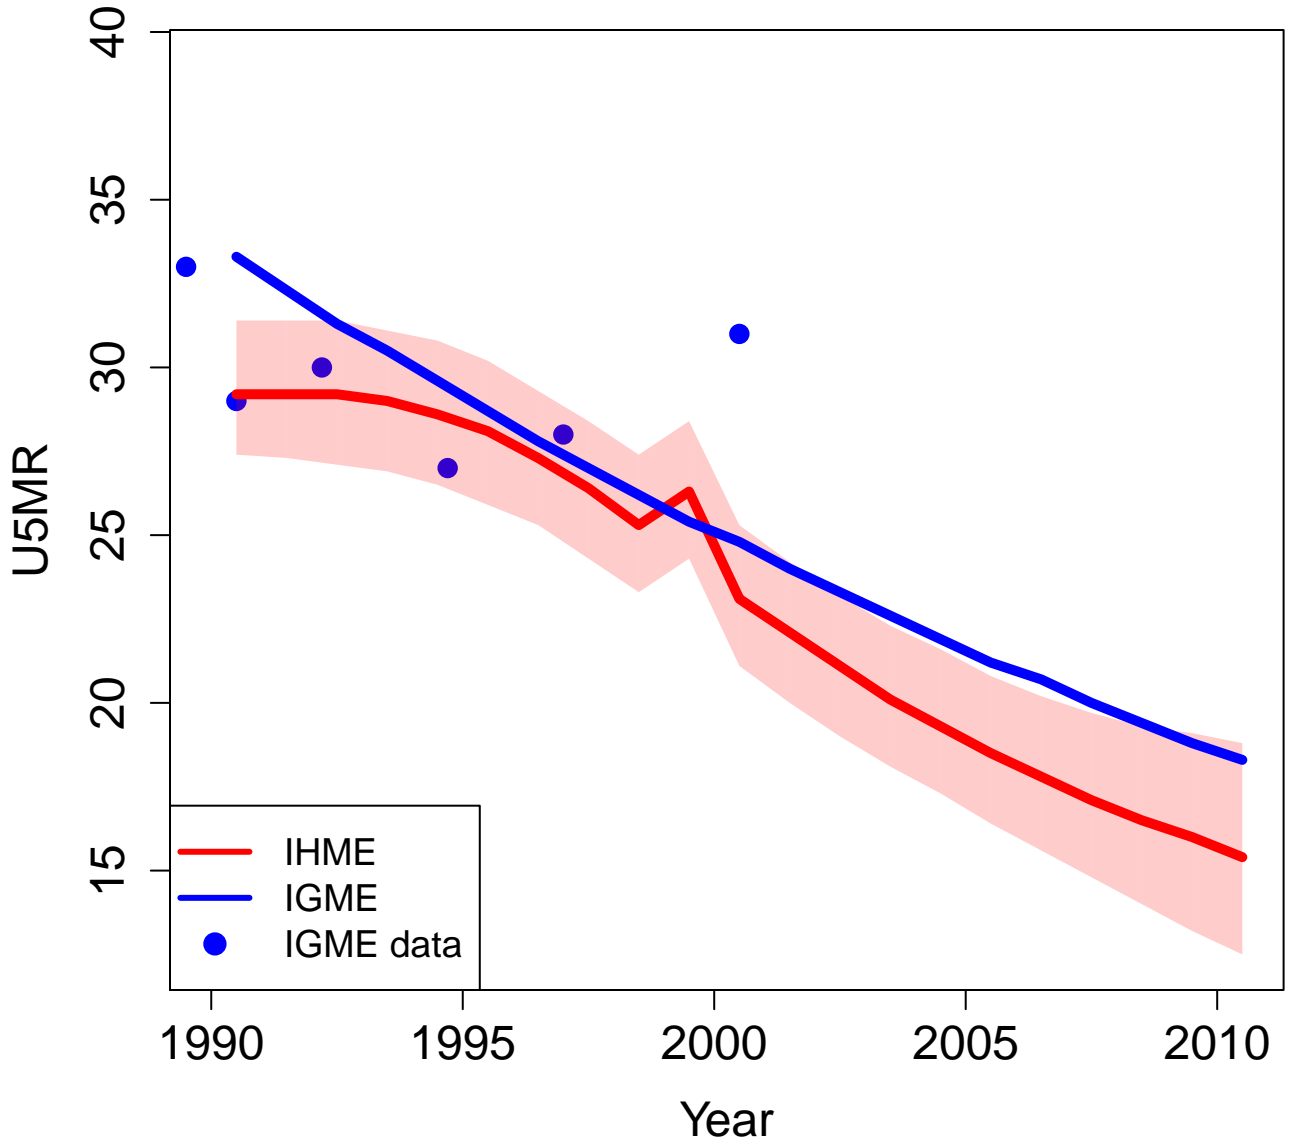

# Viet Nam

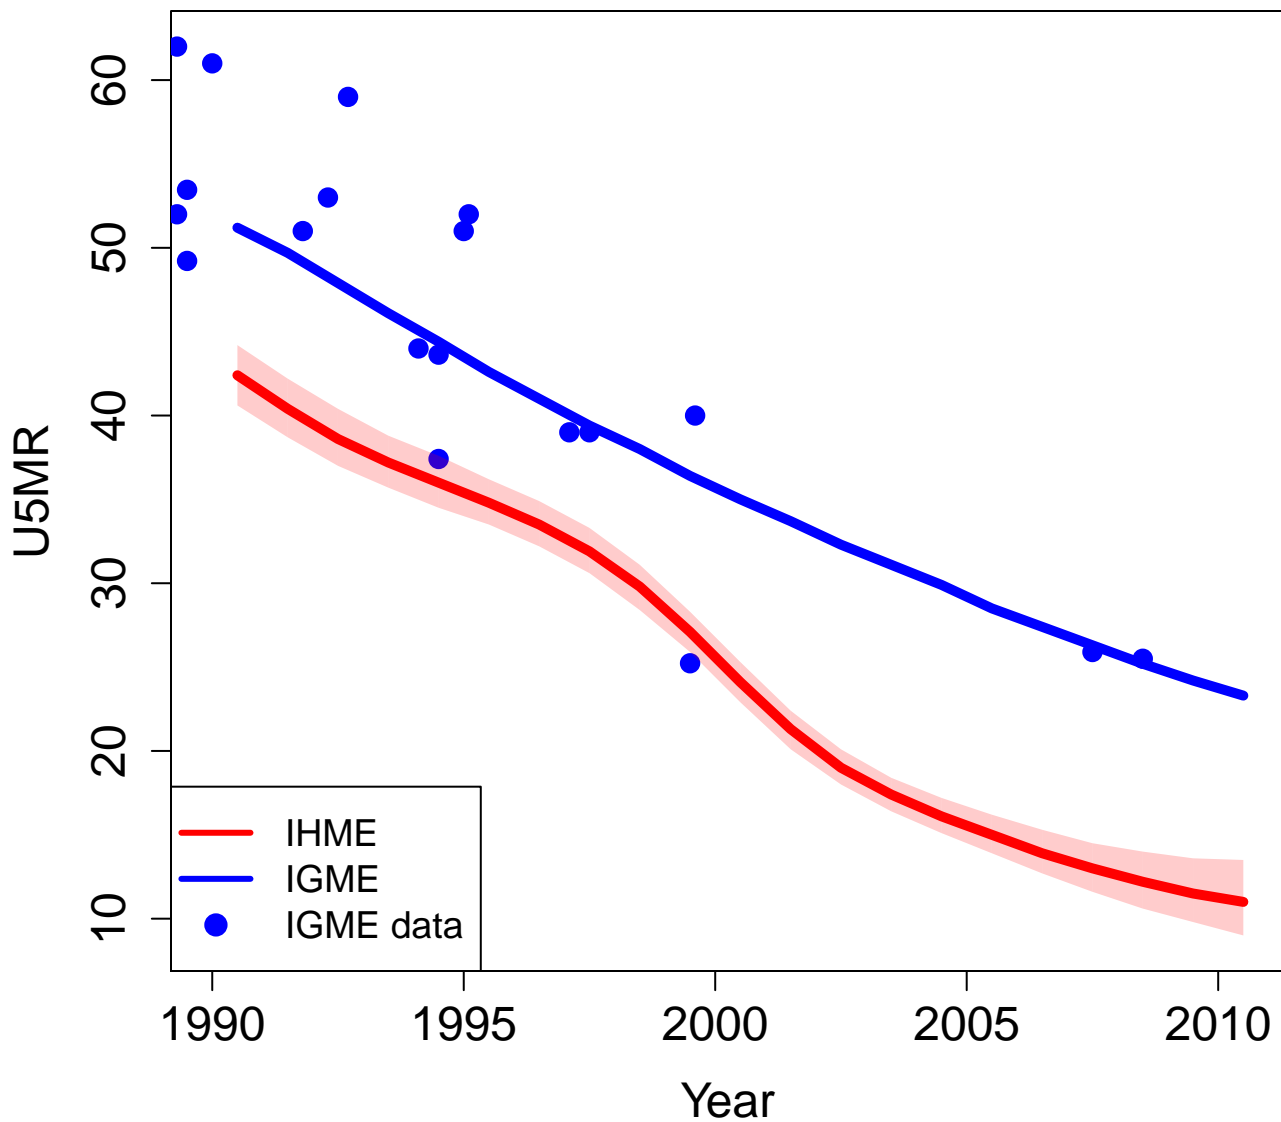

# Yemen

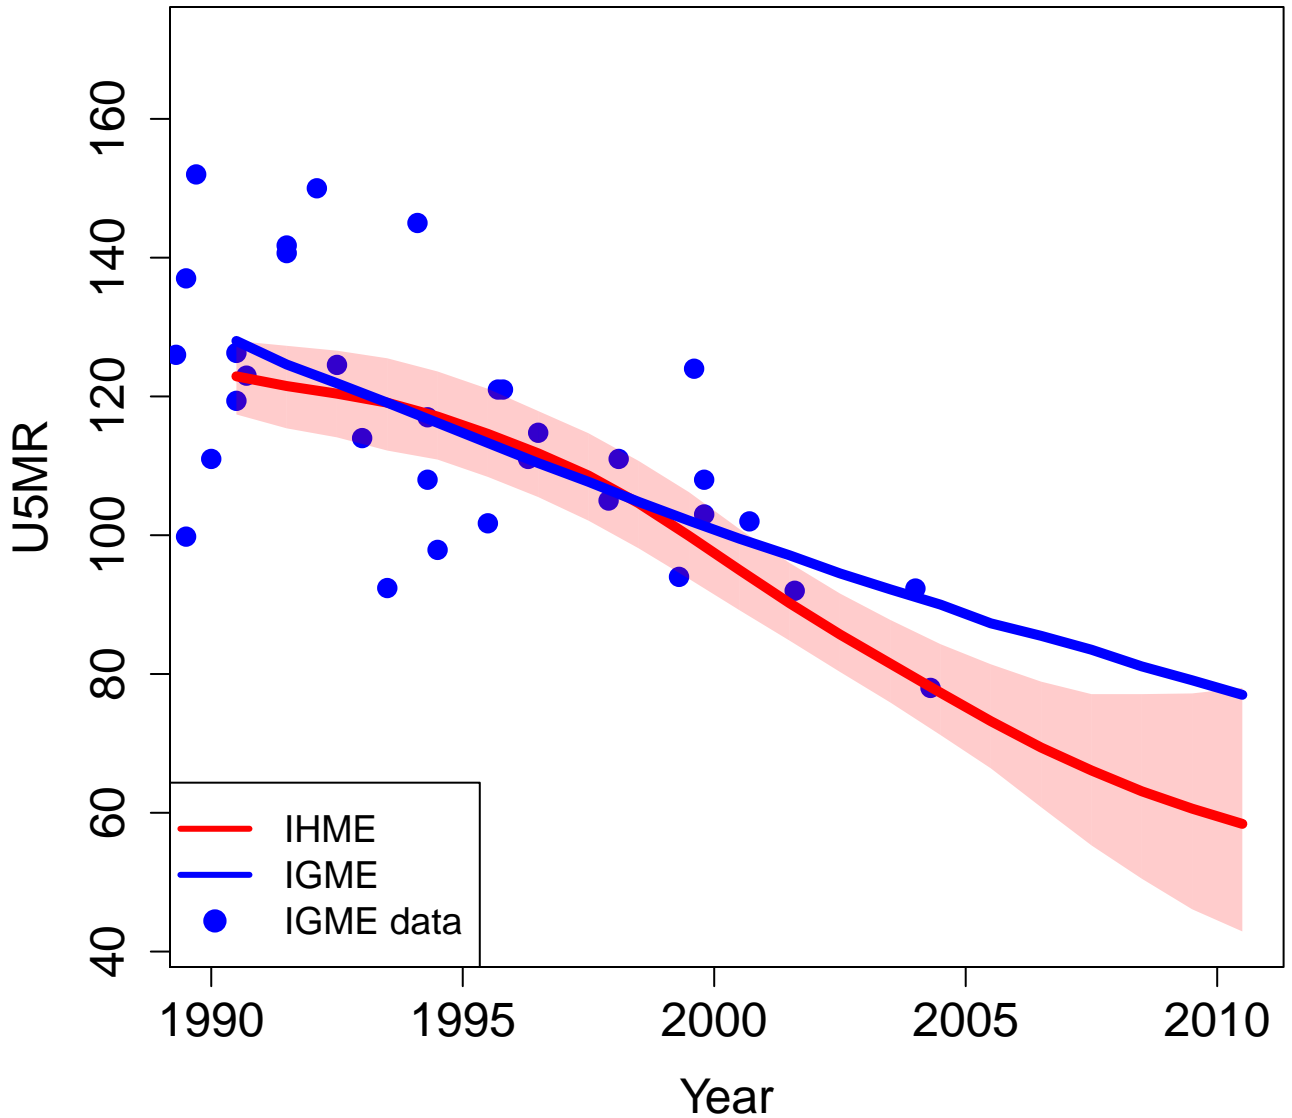



# Zambia

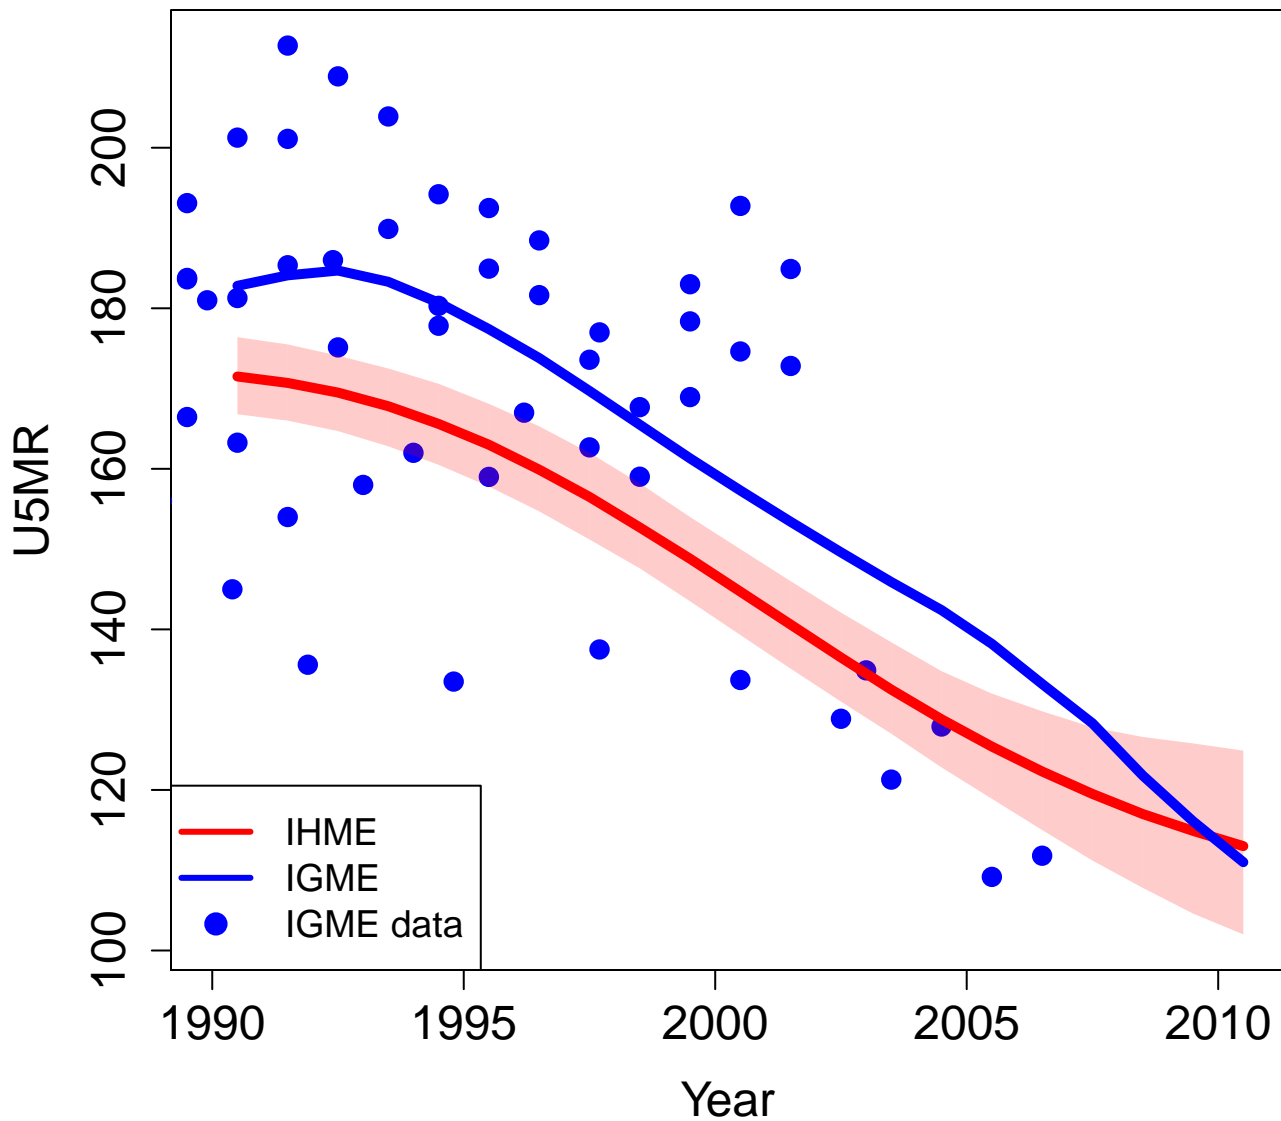

# Zimbabwe

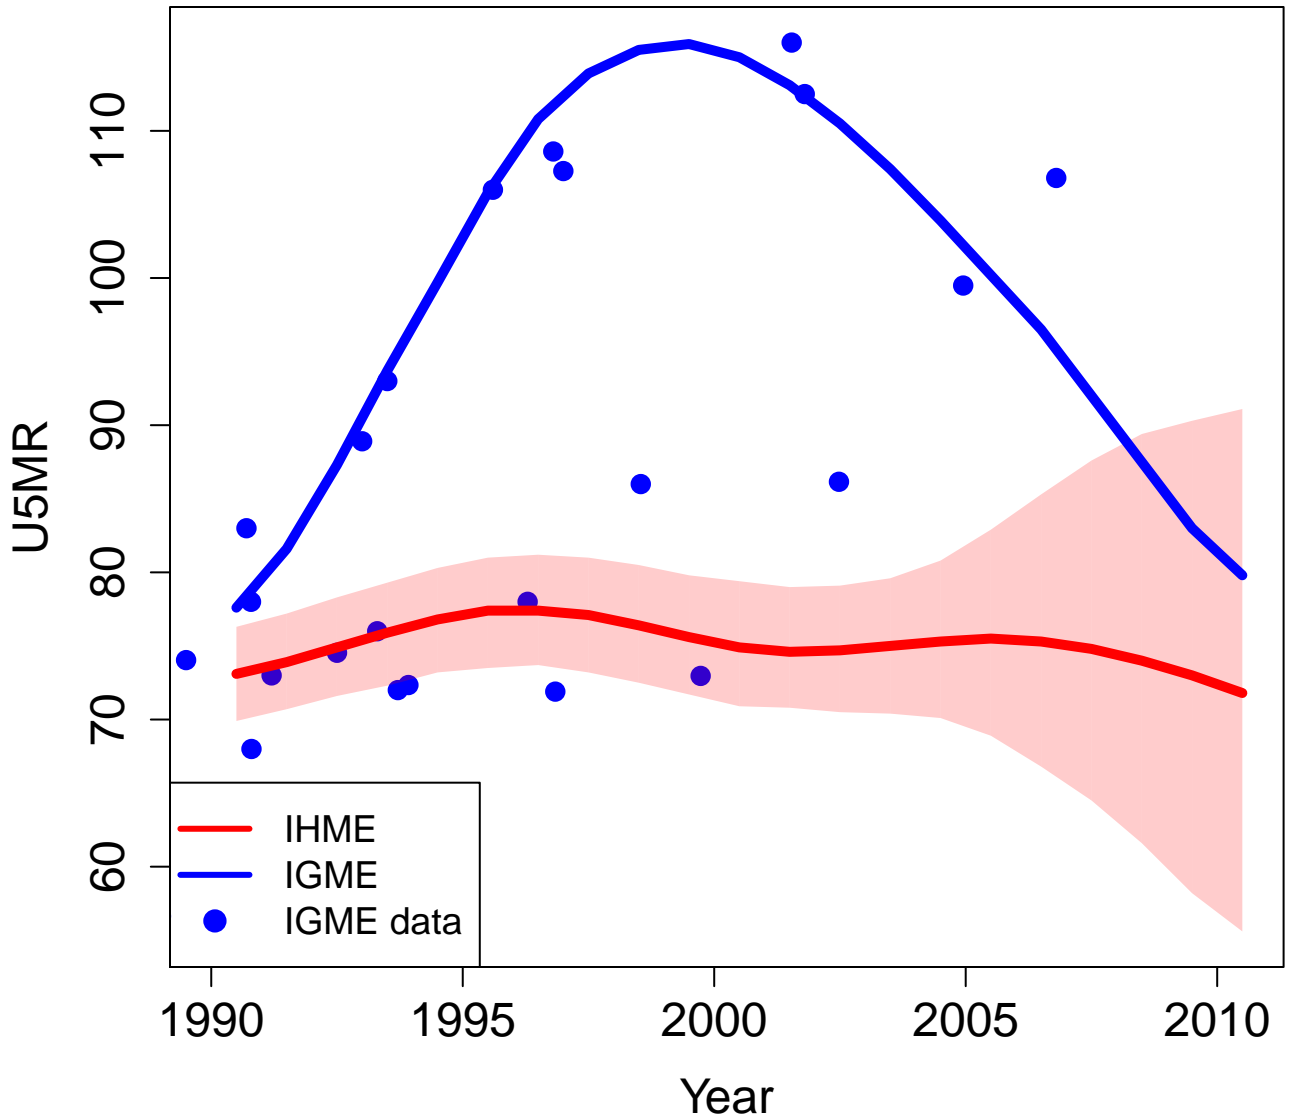

Supplement: pmed.1001288.s001.pdf [file pmed.1001288.s001.pdf]
