# Supplementary material for: Child Mortality Estimation: A Comparison of UN IGME and IHME Estimates of Levels and Trends in Under-Five Mortality Rates and Deaths
Source: PubMed Central journal article supplement (PMC3429386; doi:10.1371/journal.pmed.1001288), 2012-08-28

# Angola

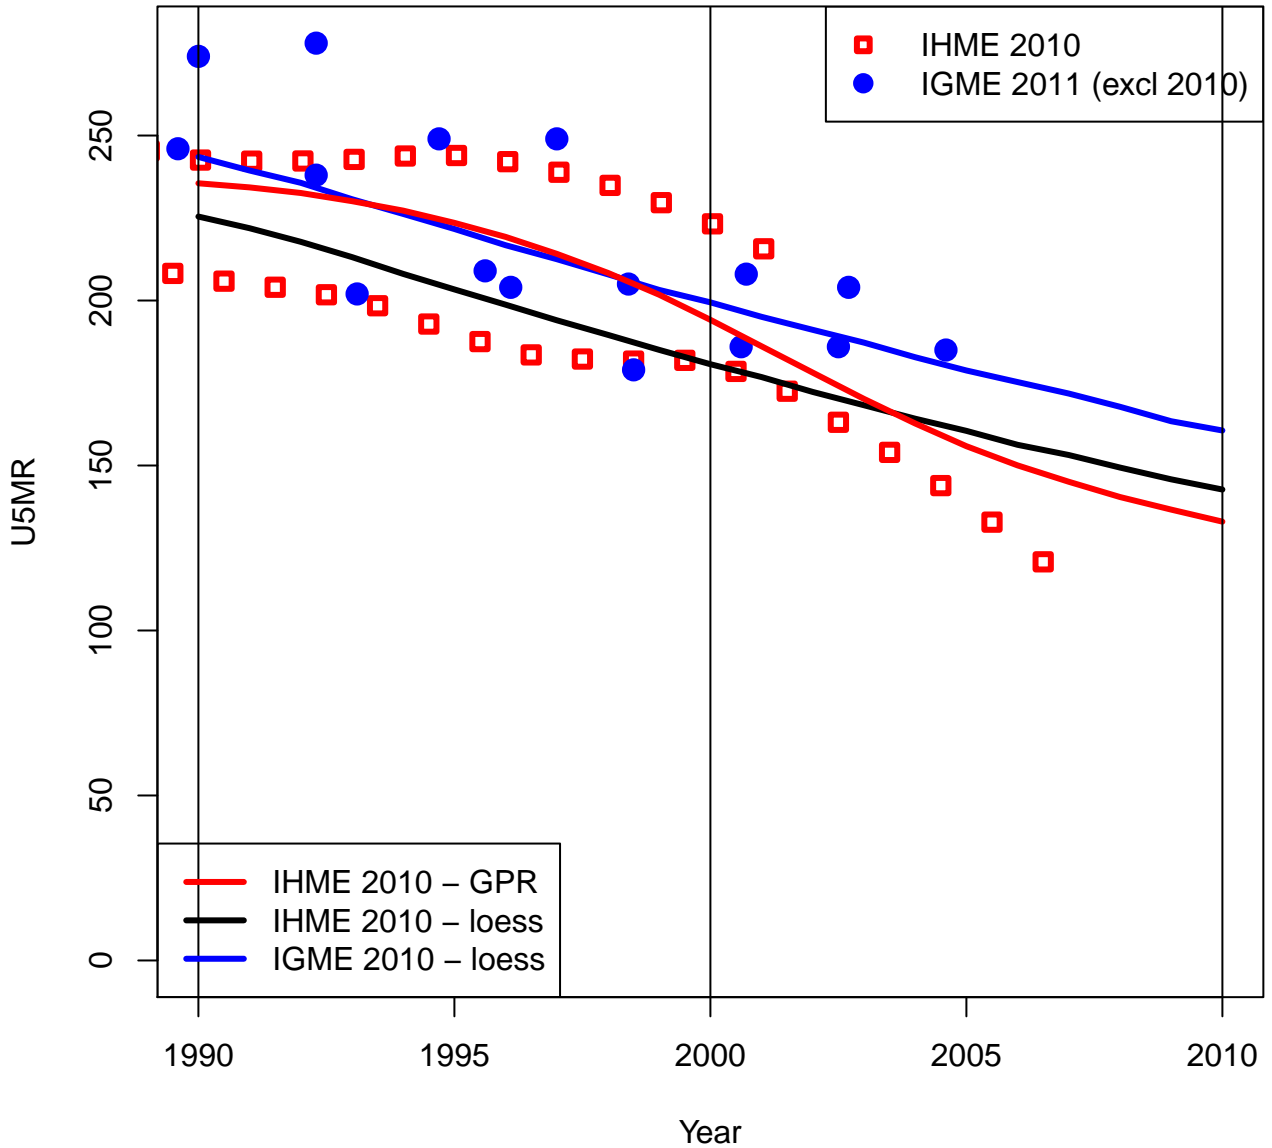

# Bangladesh

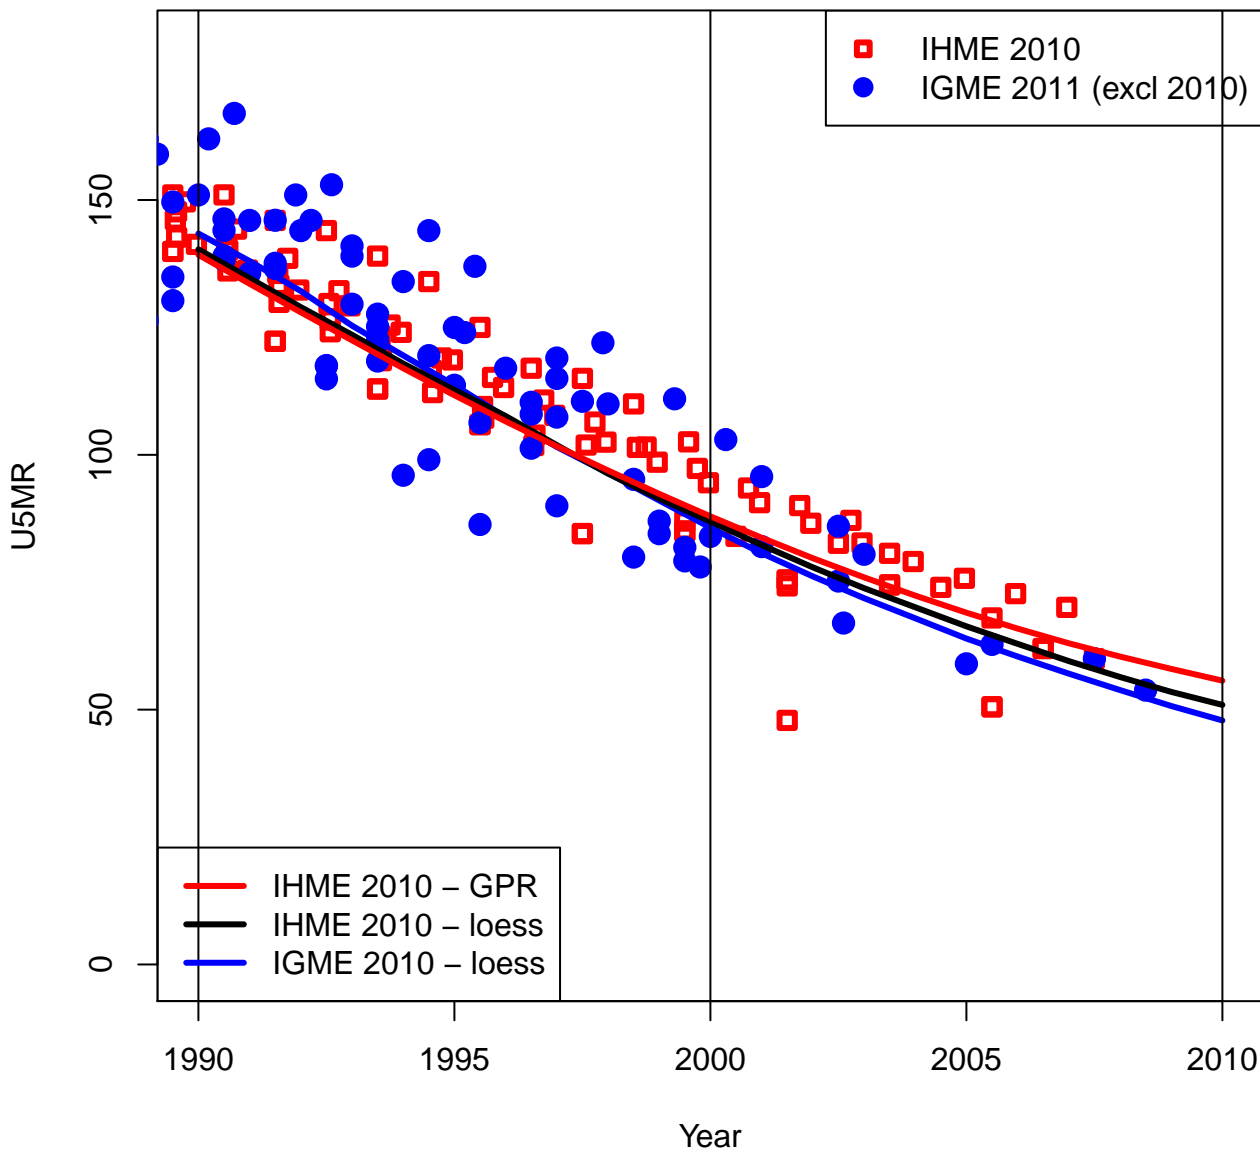

# Benin

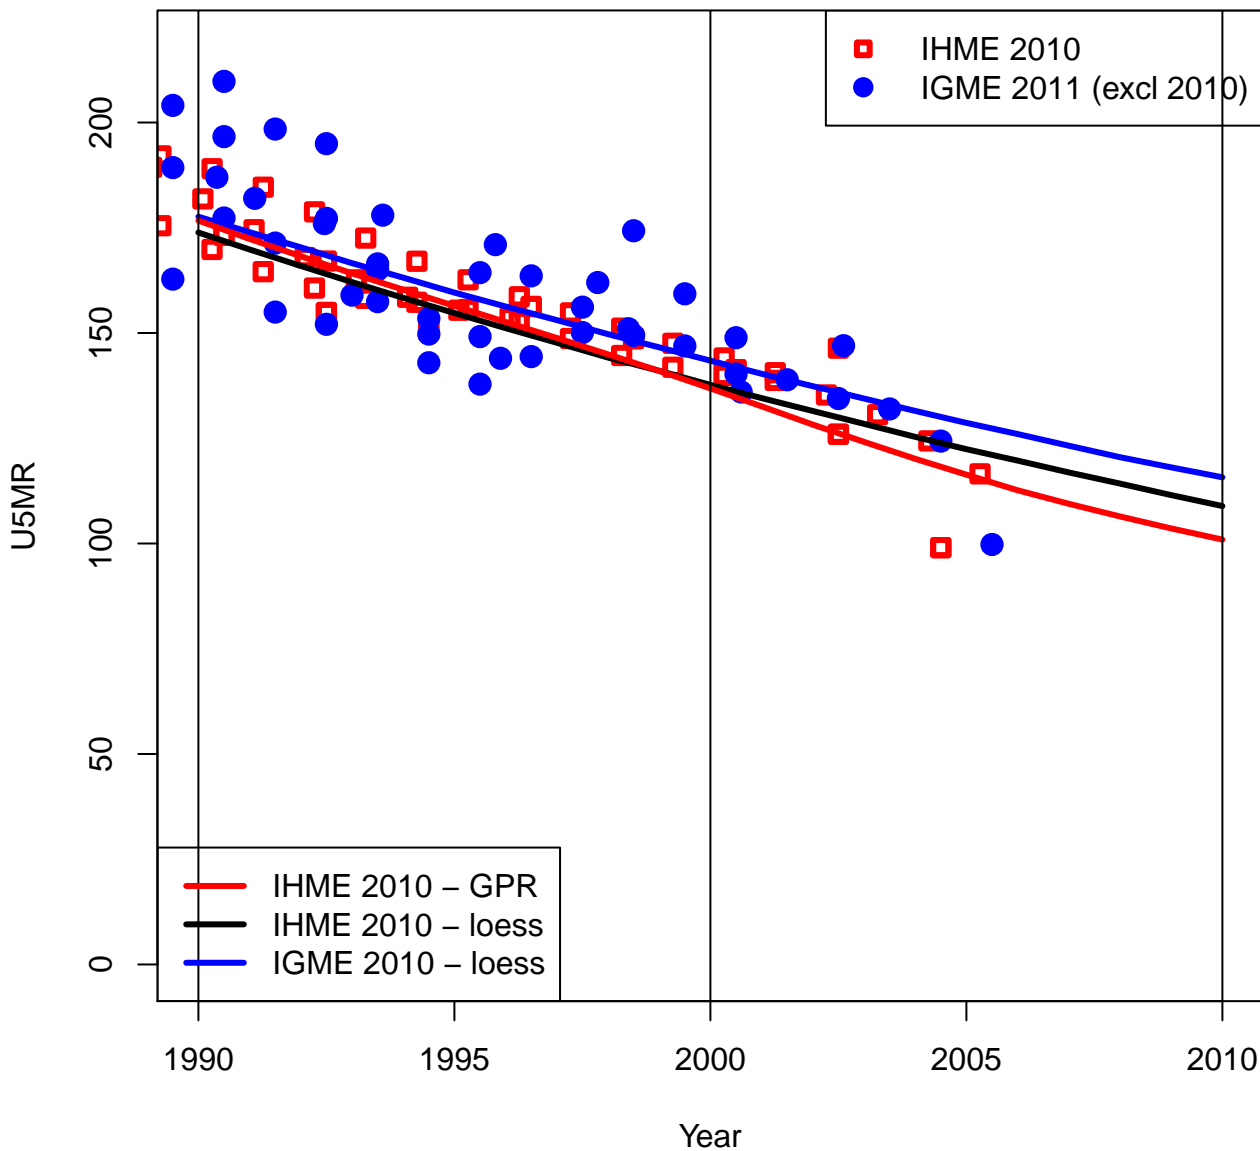

# Bhutan

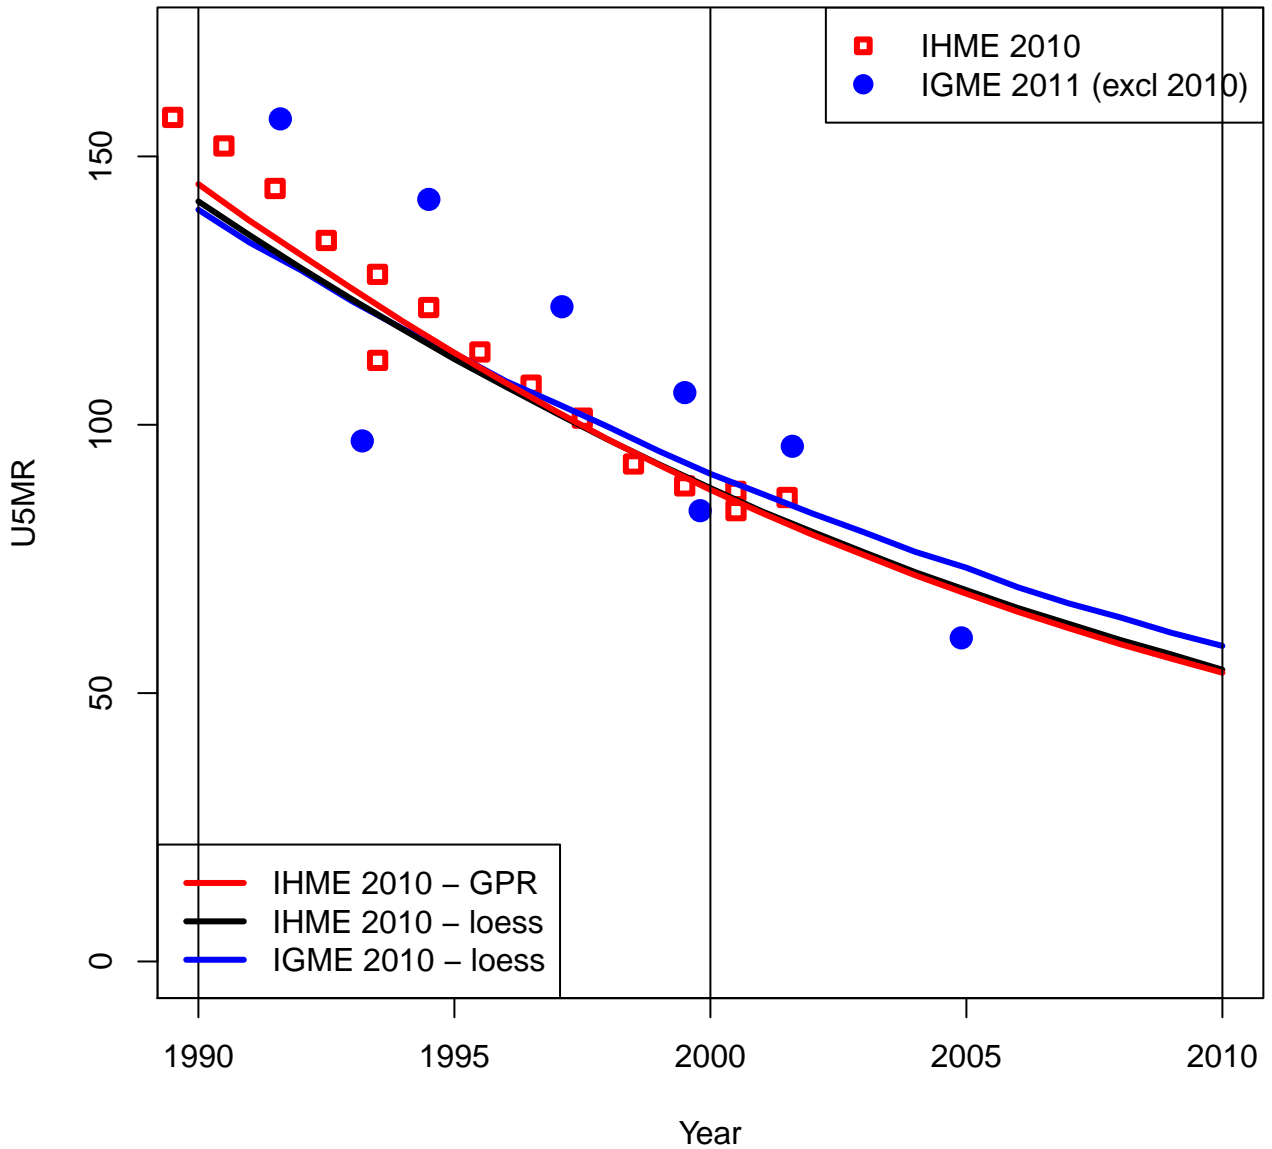

# Burkina Faso

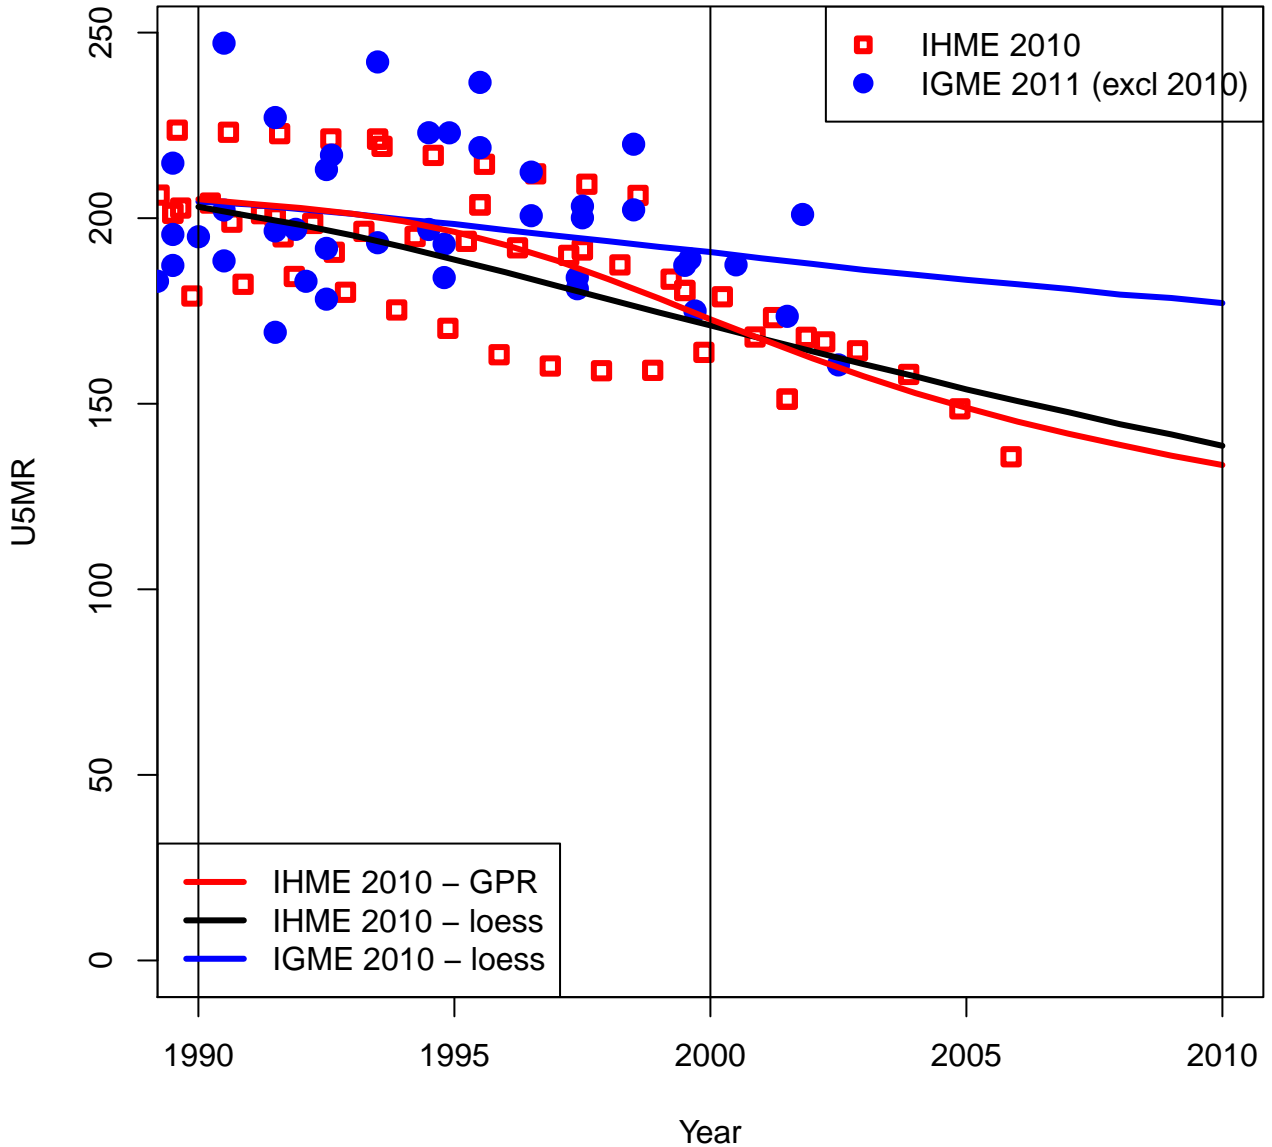

# Burundi

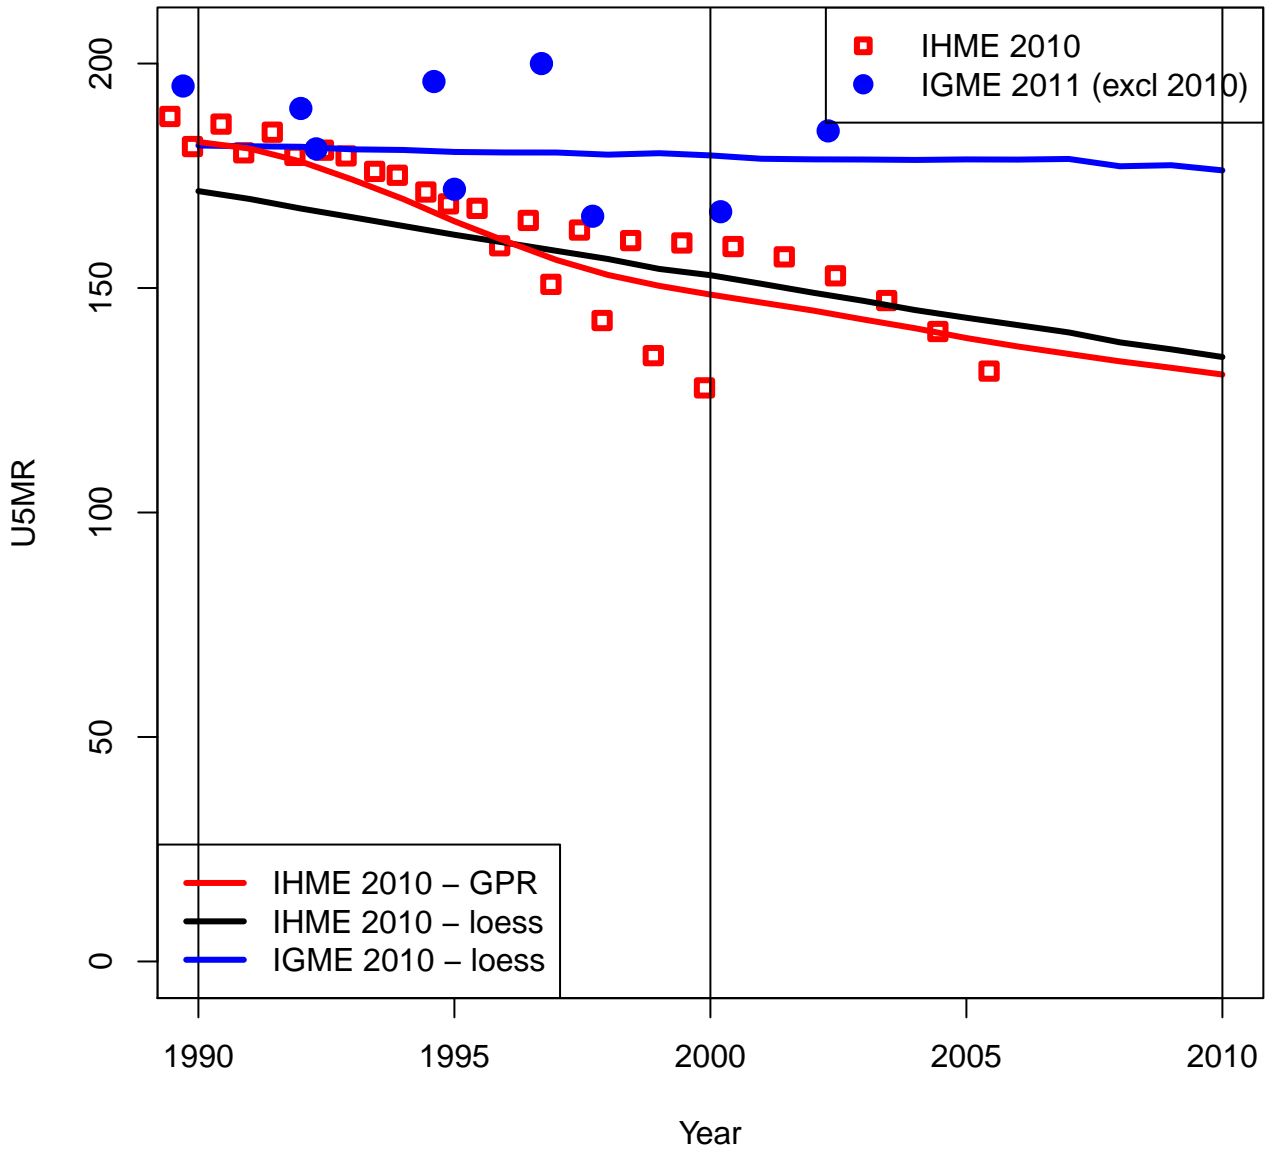

# Chad

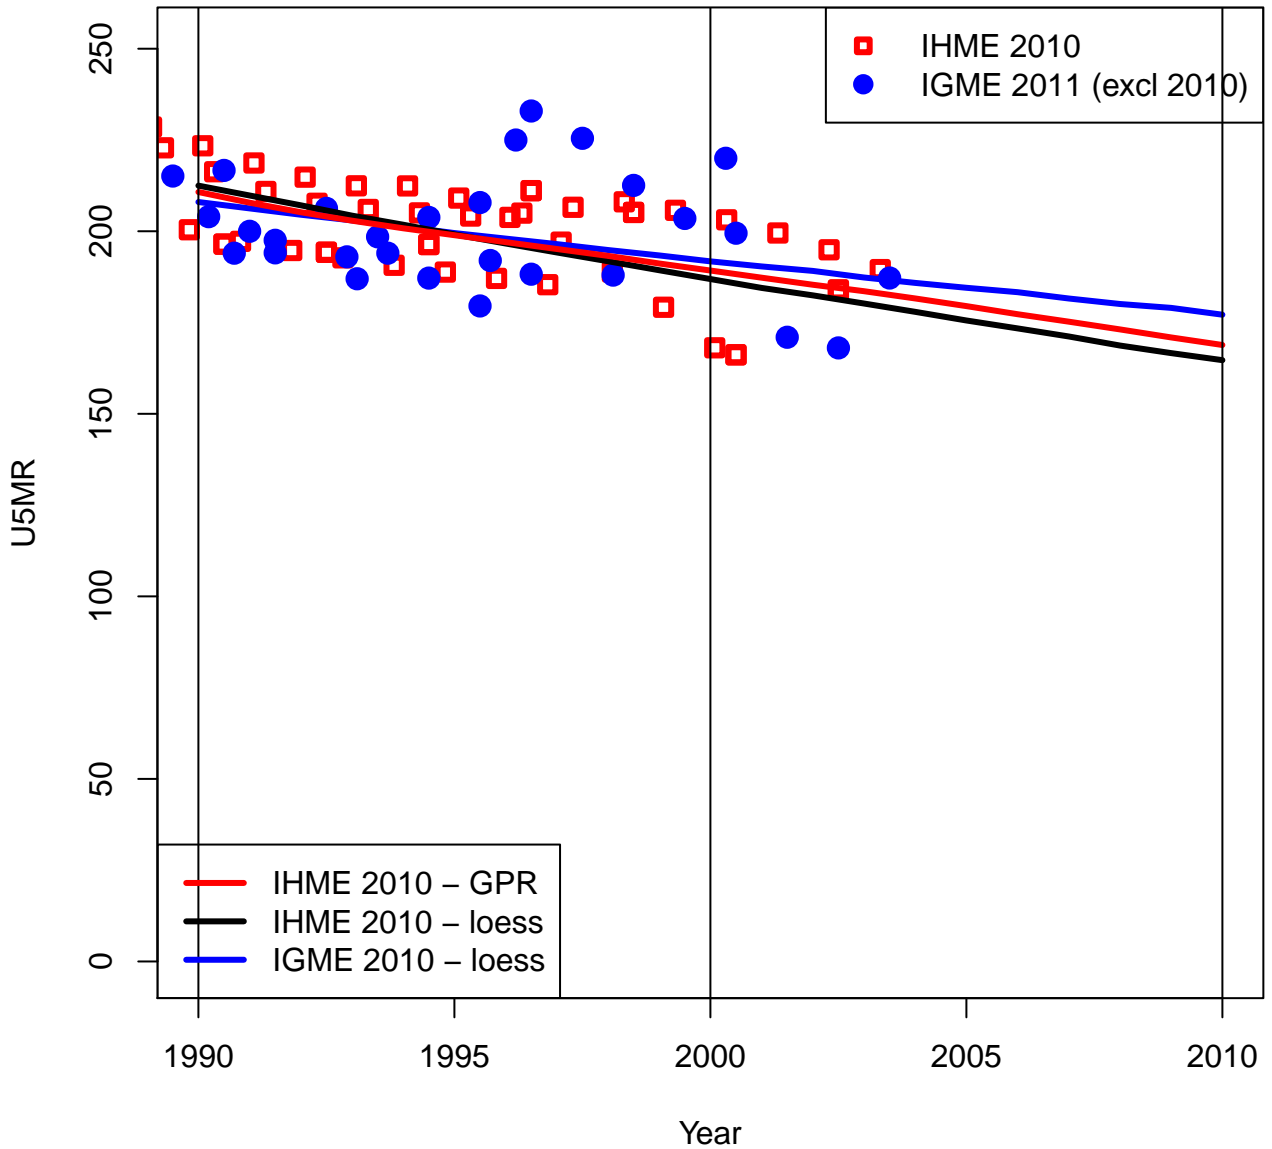

# Comoros

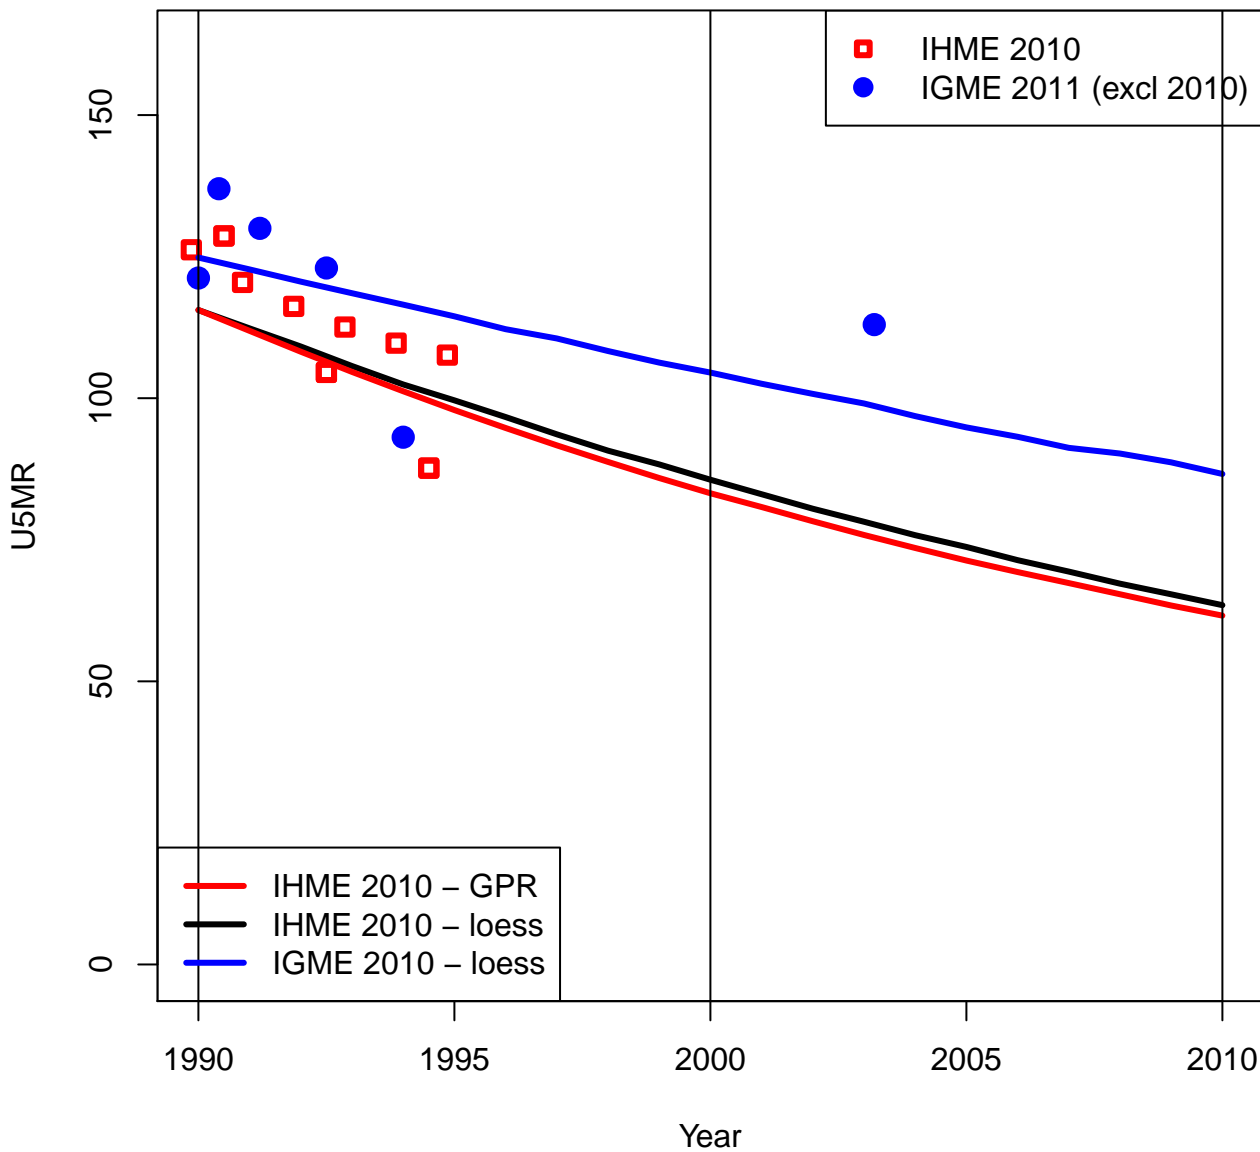



# Congo

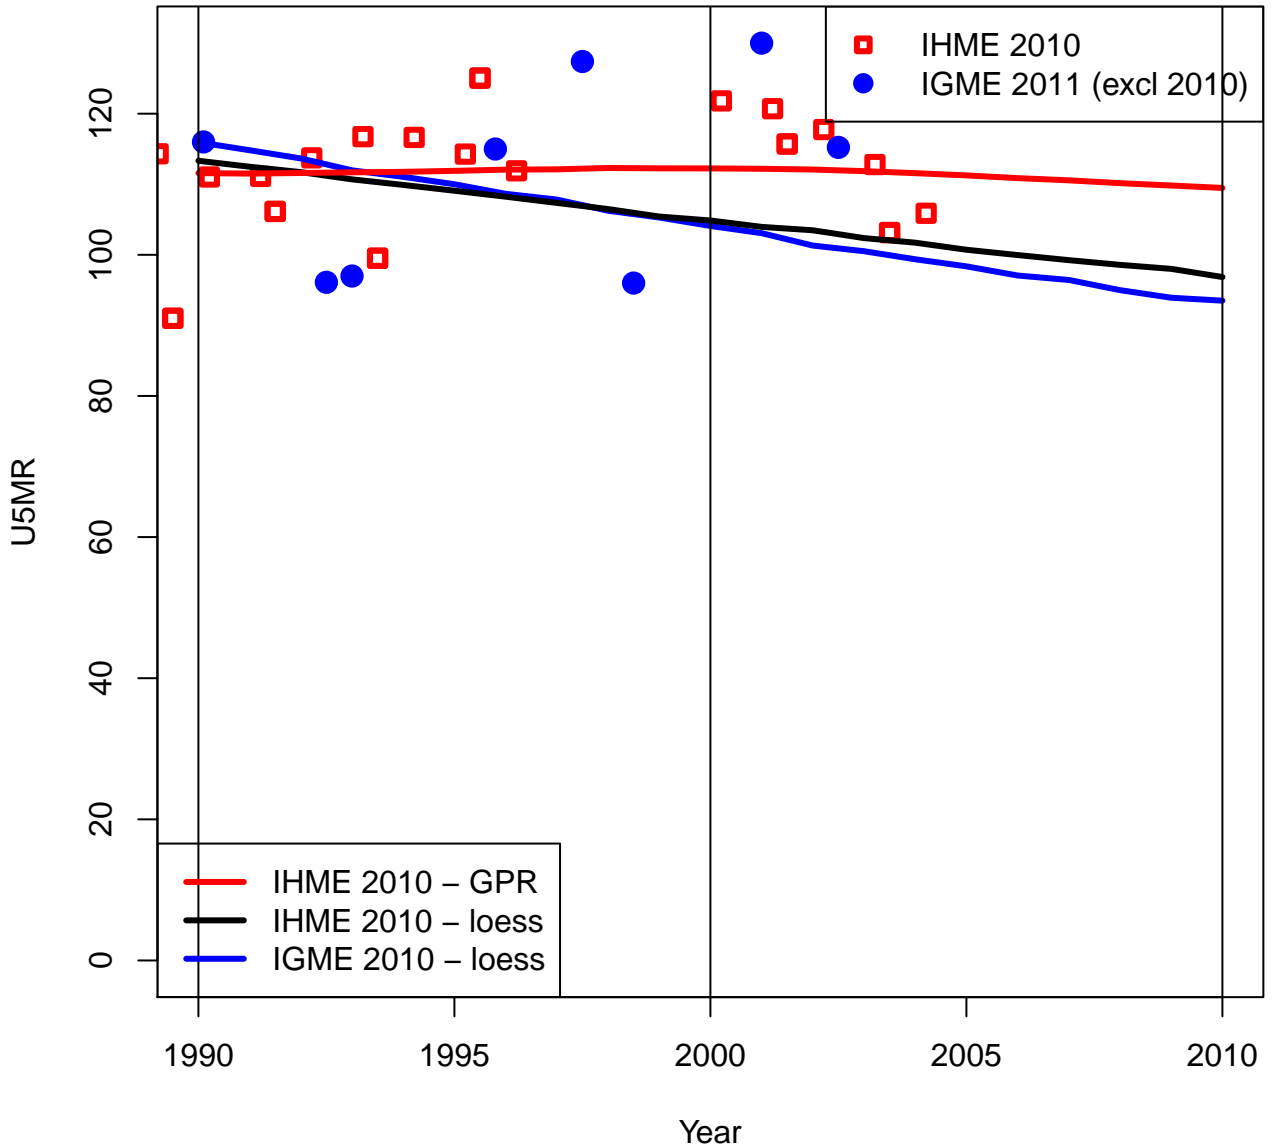

# Djibouti

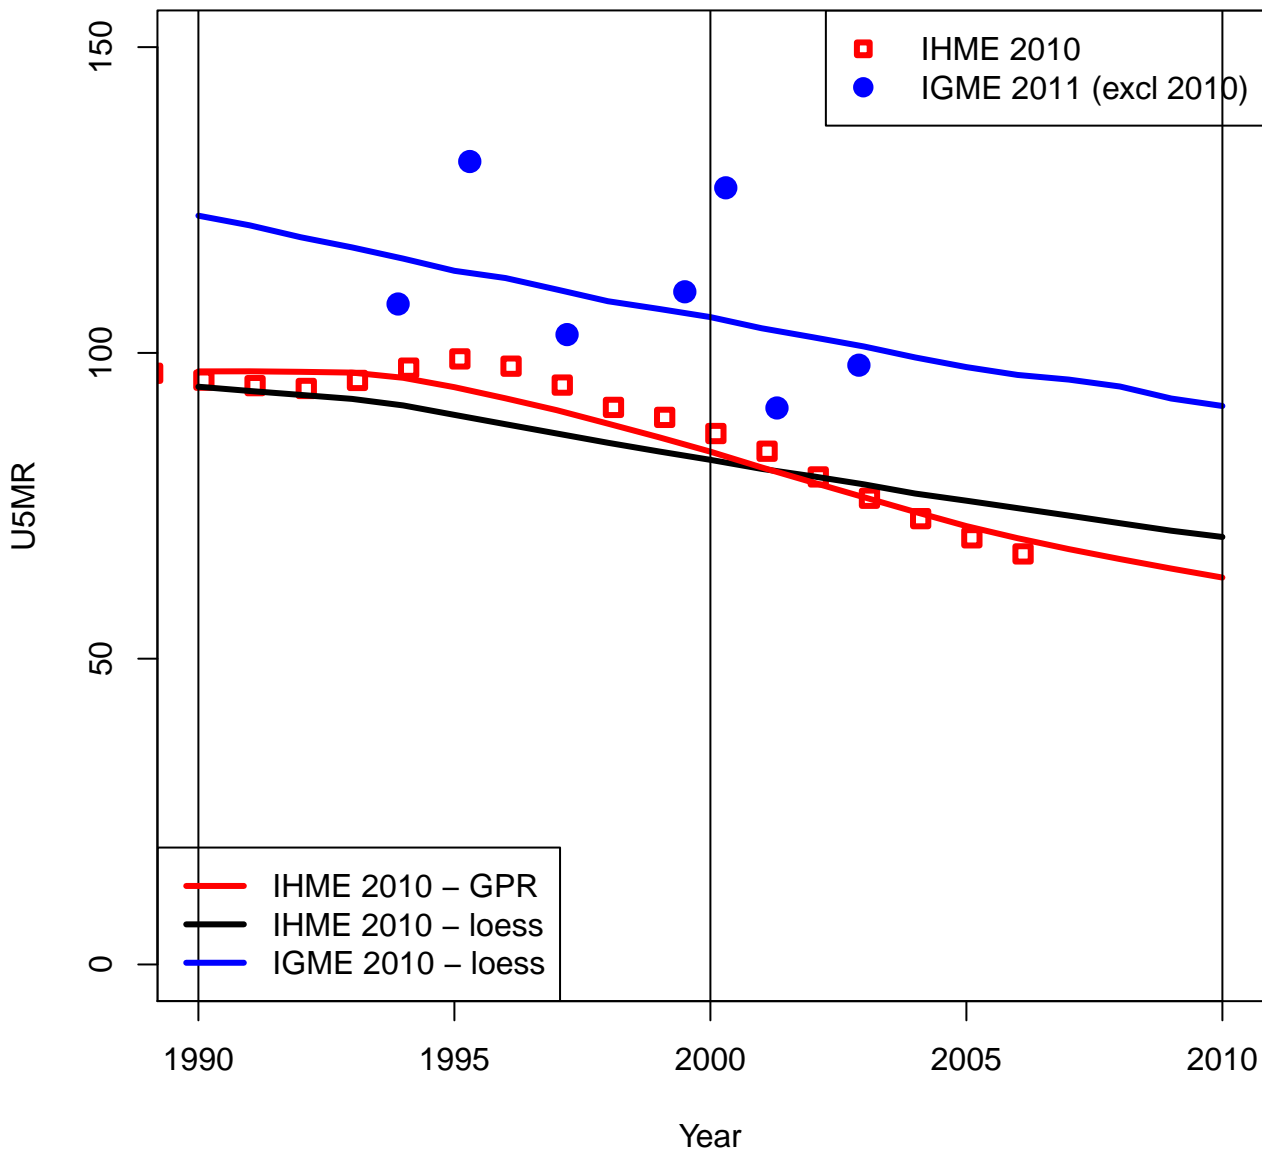

# Ethiopia

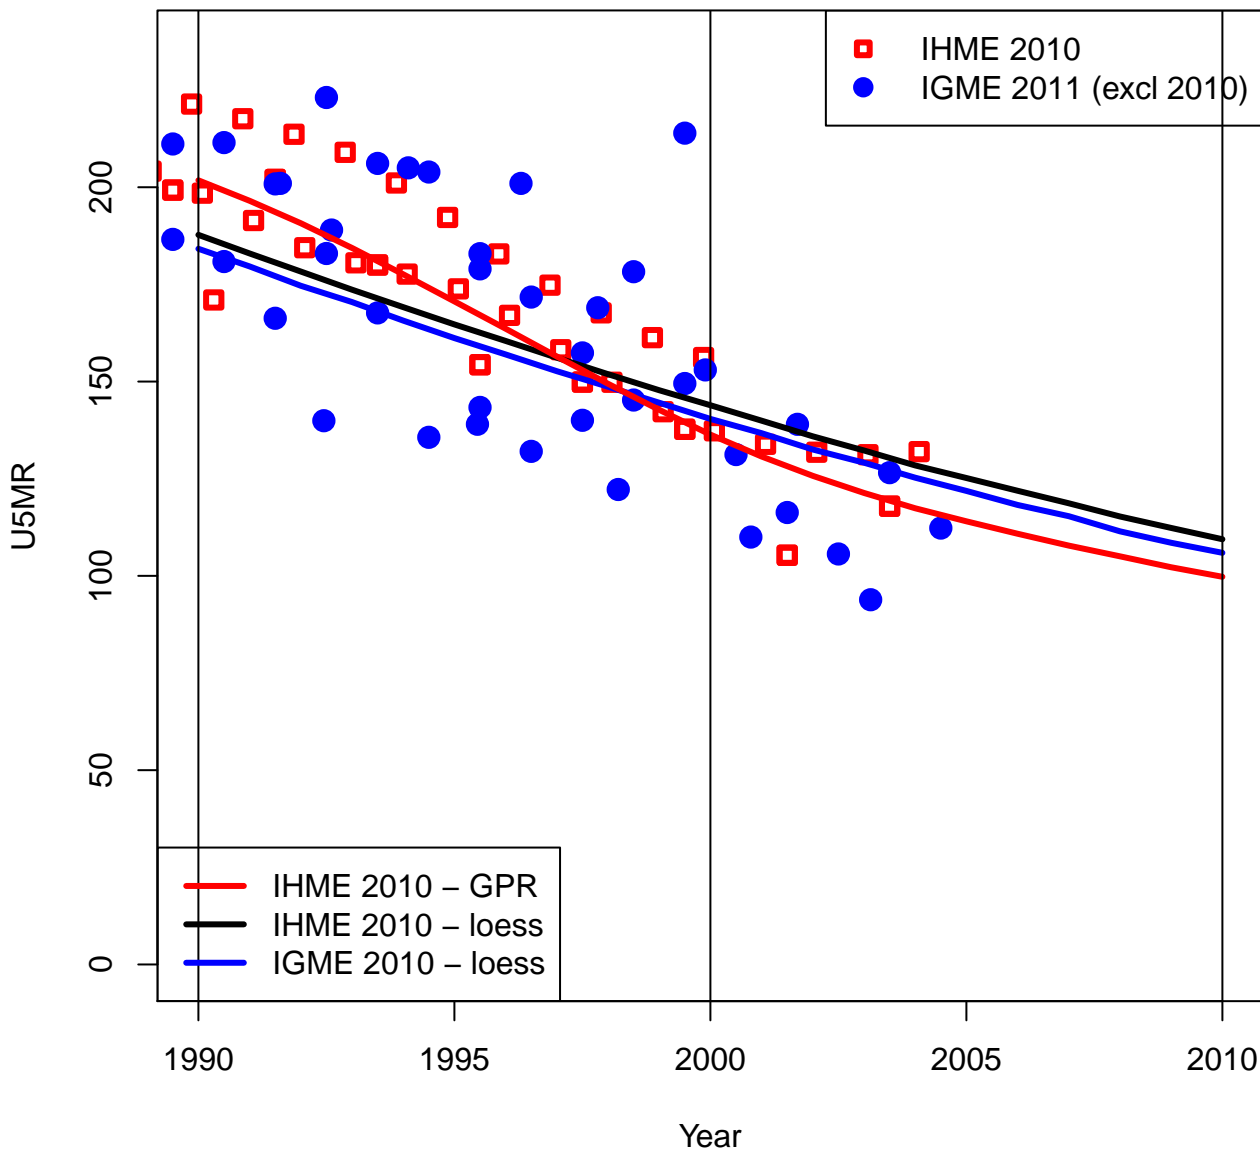

# Fiji

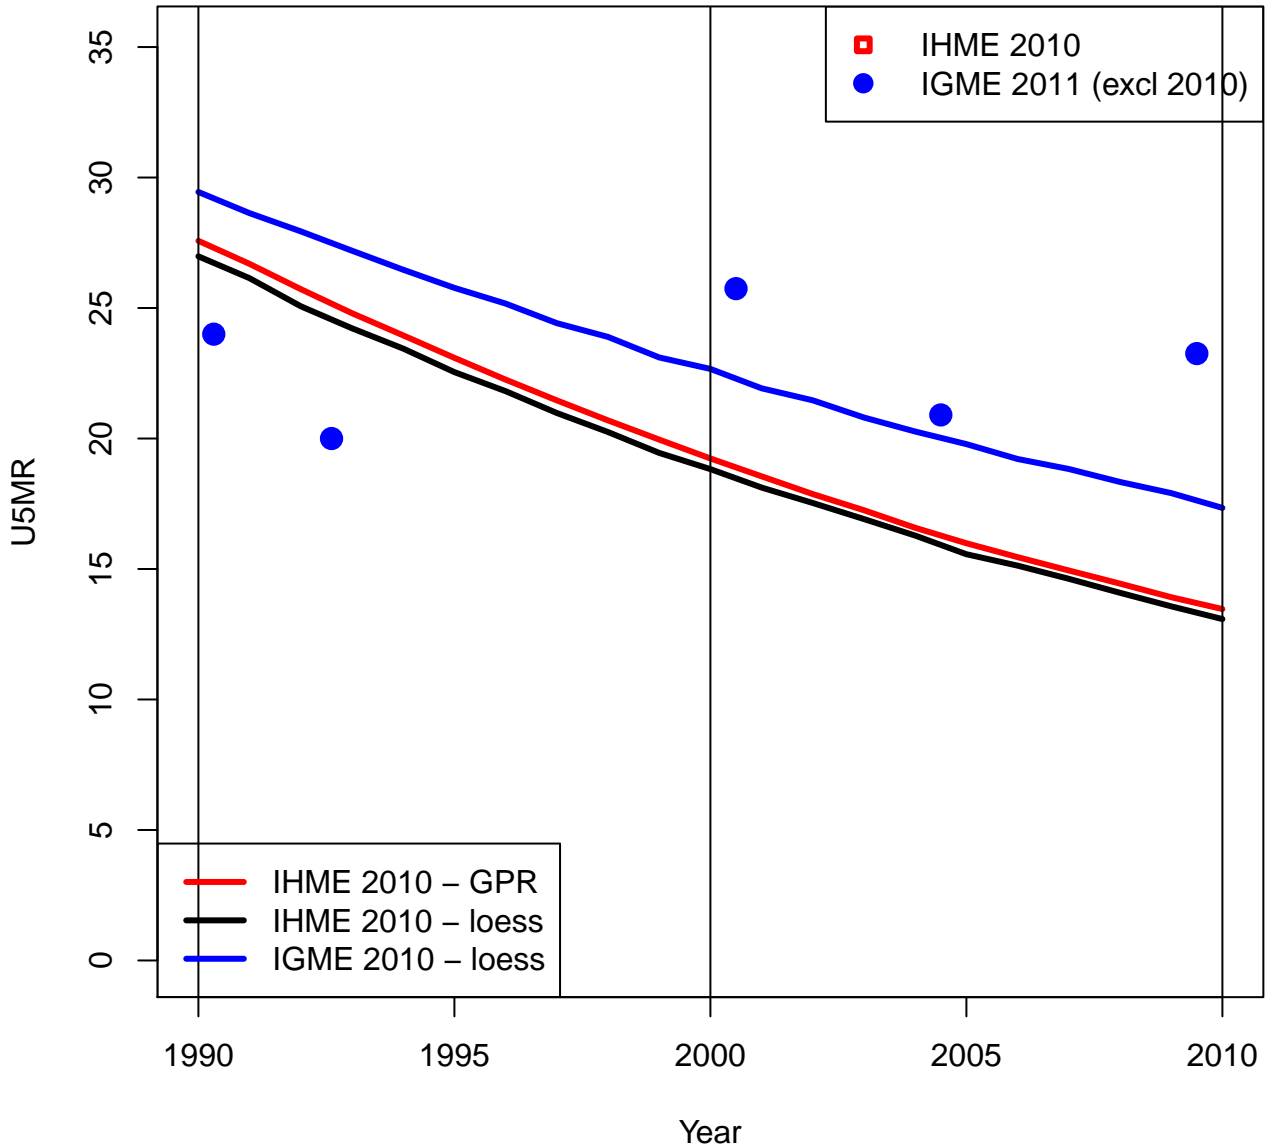

# Gambia

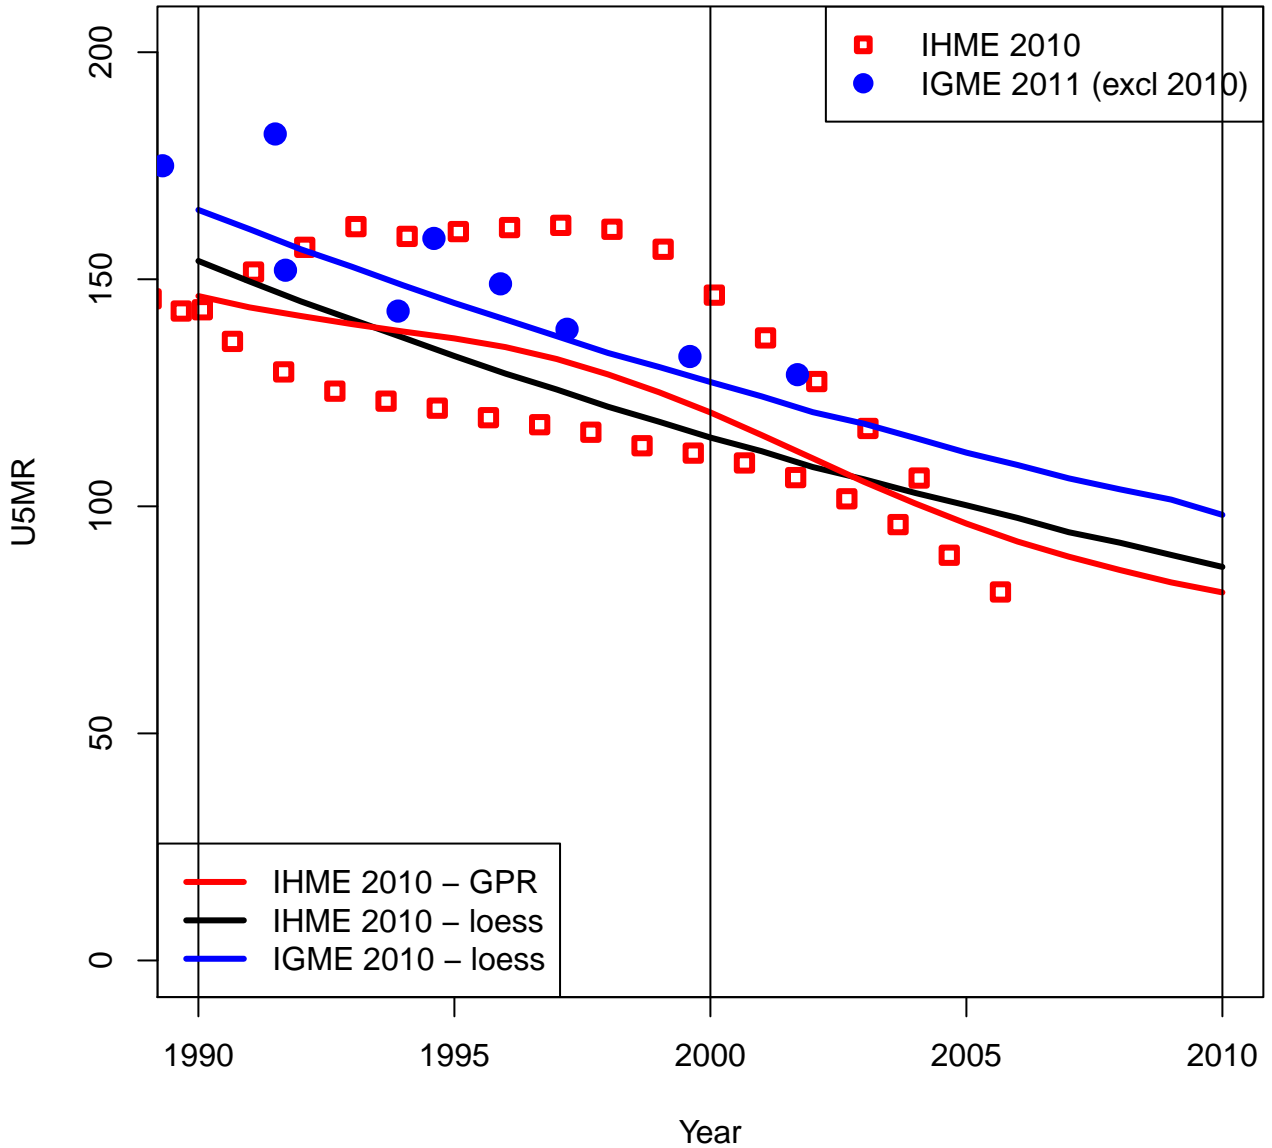

# Ghana

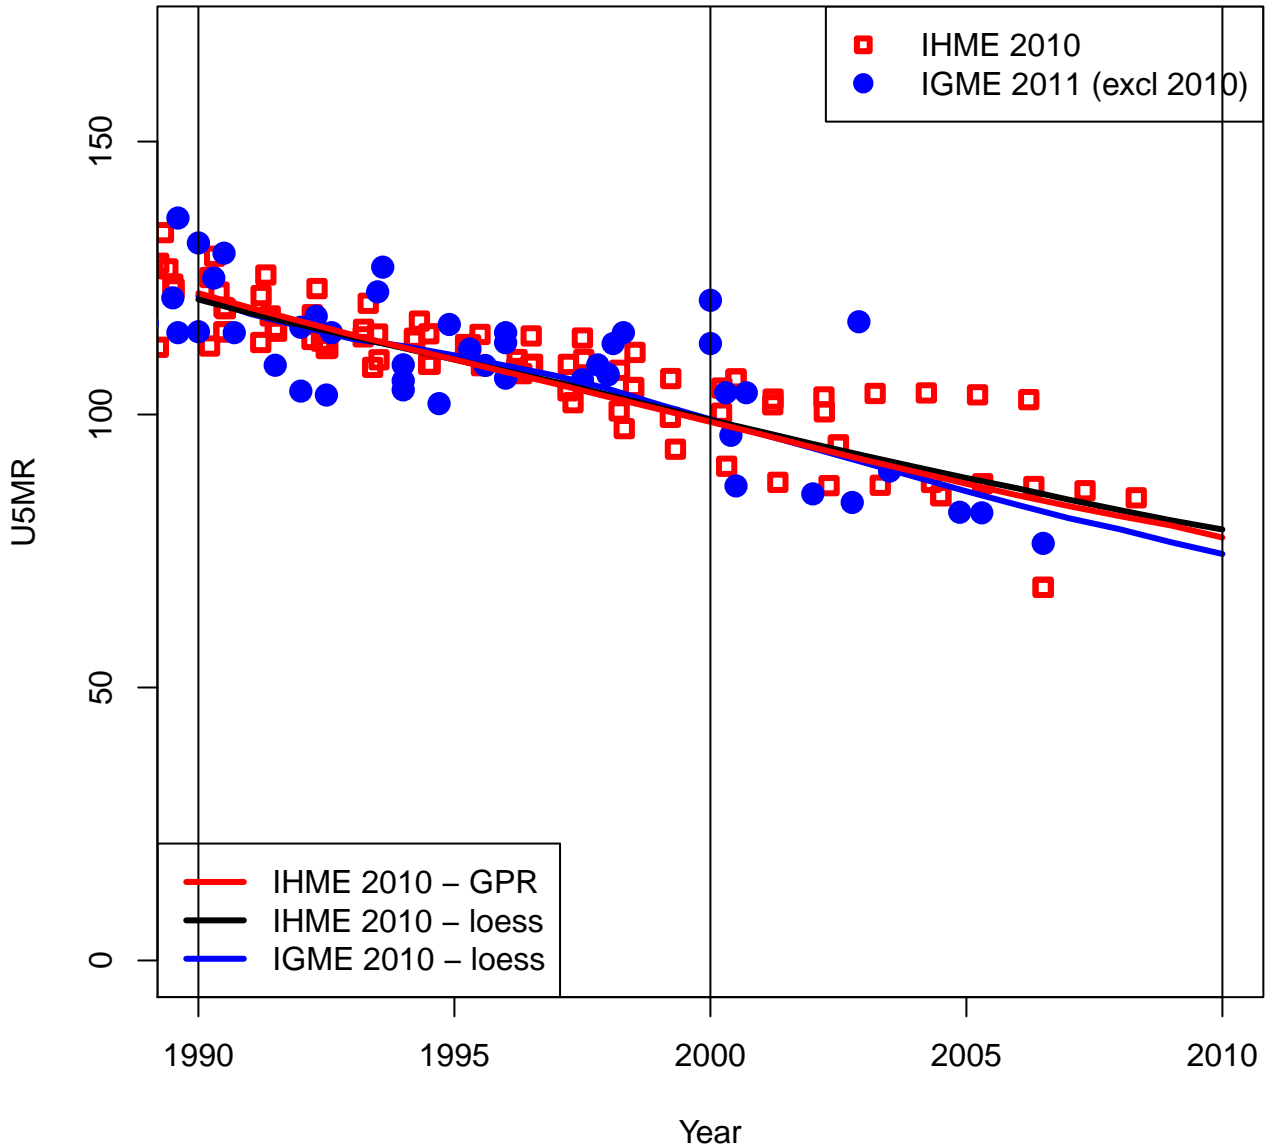

# Guinea

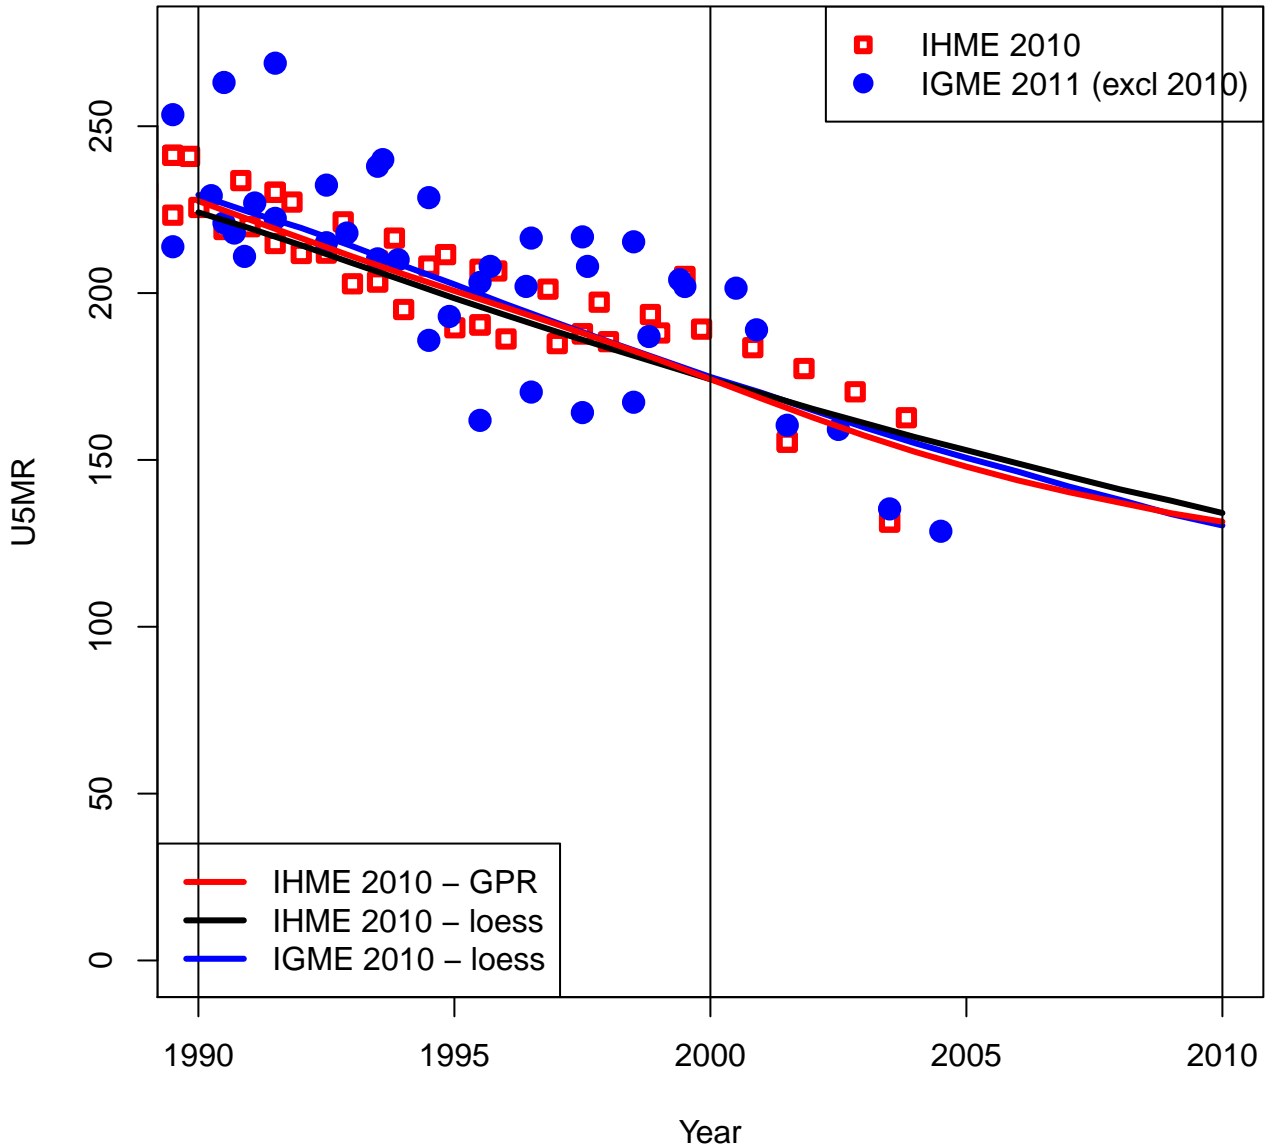

# Haiti

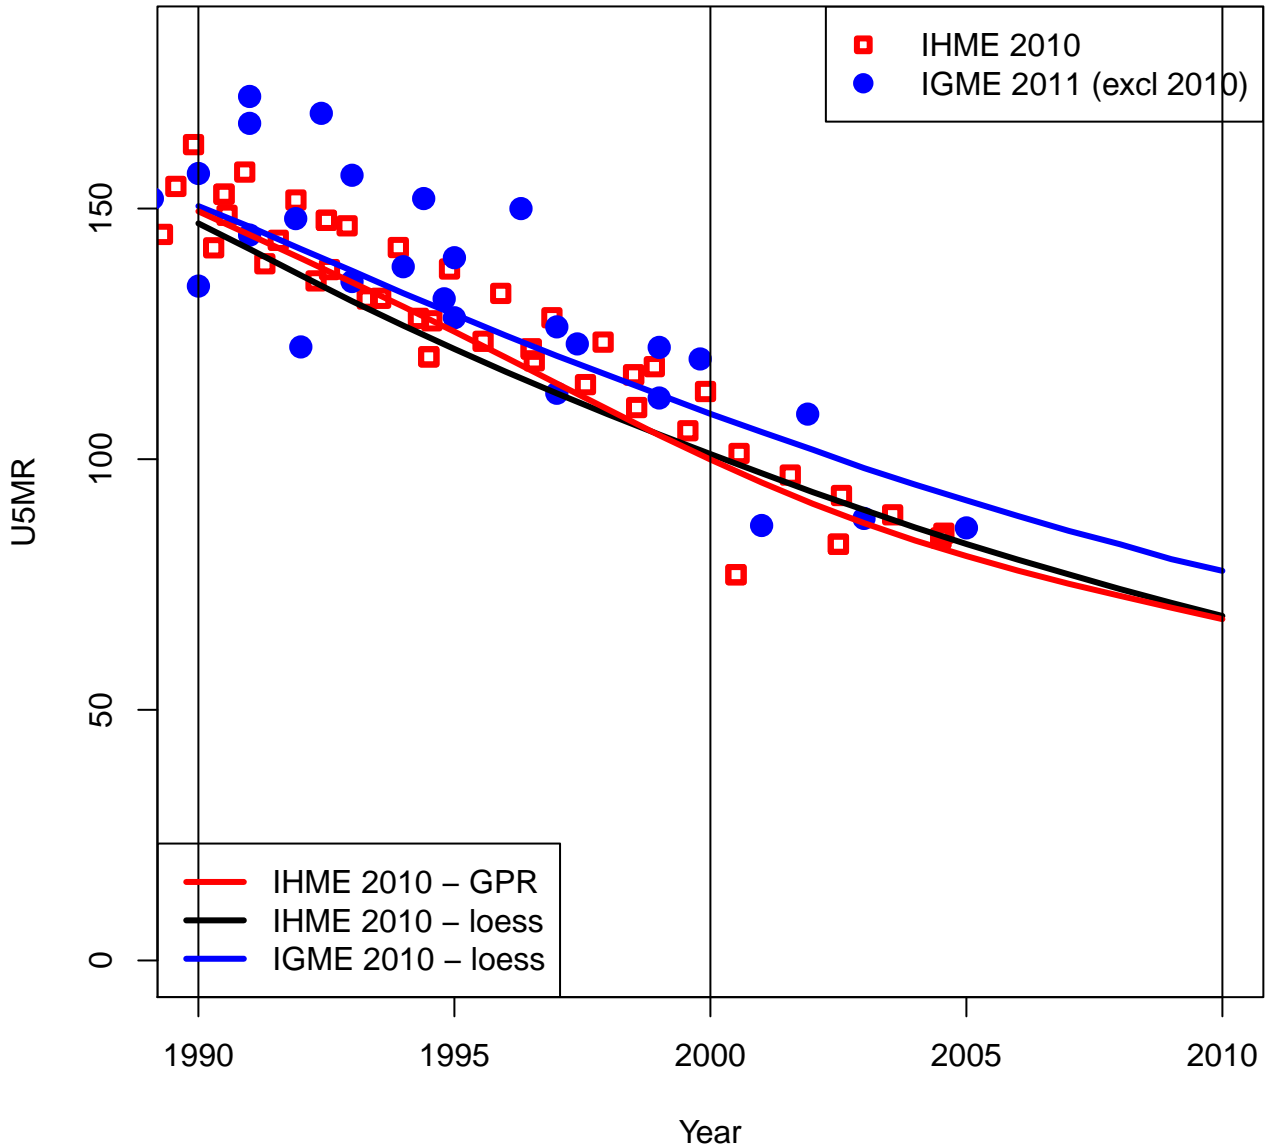



# India

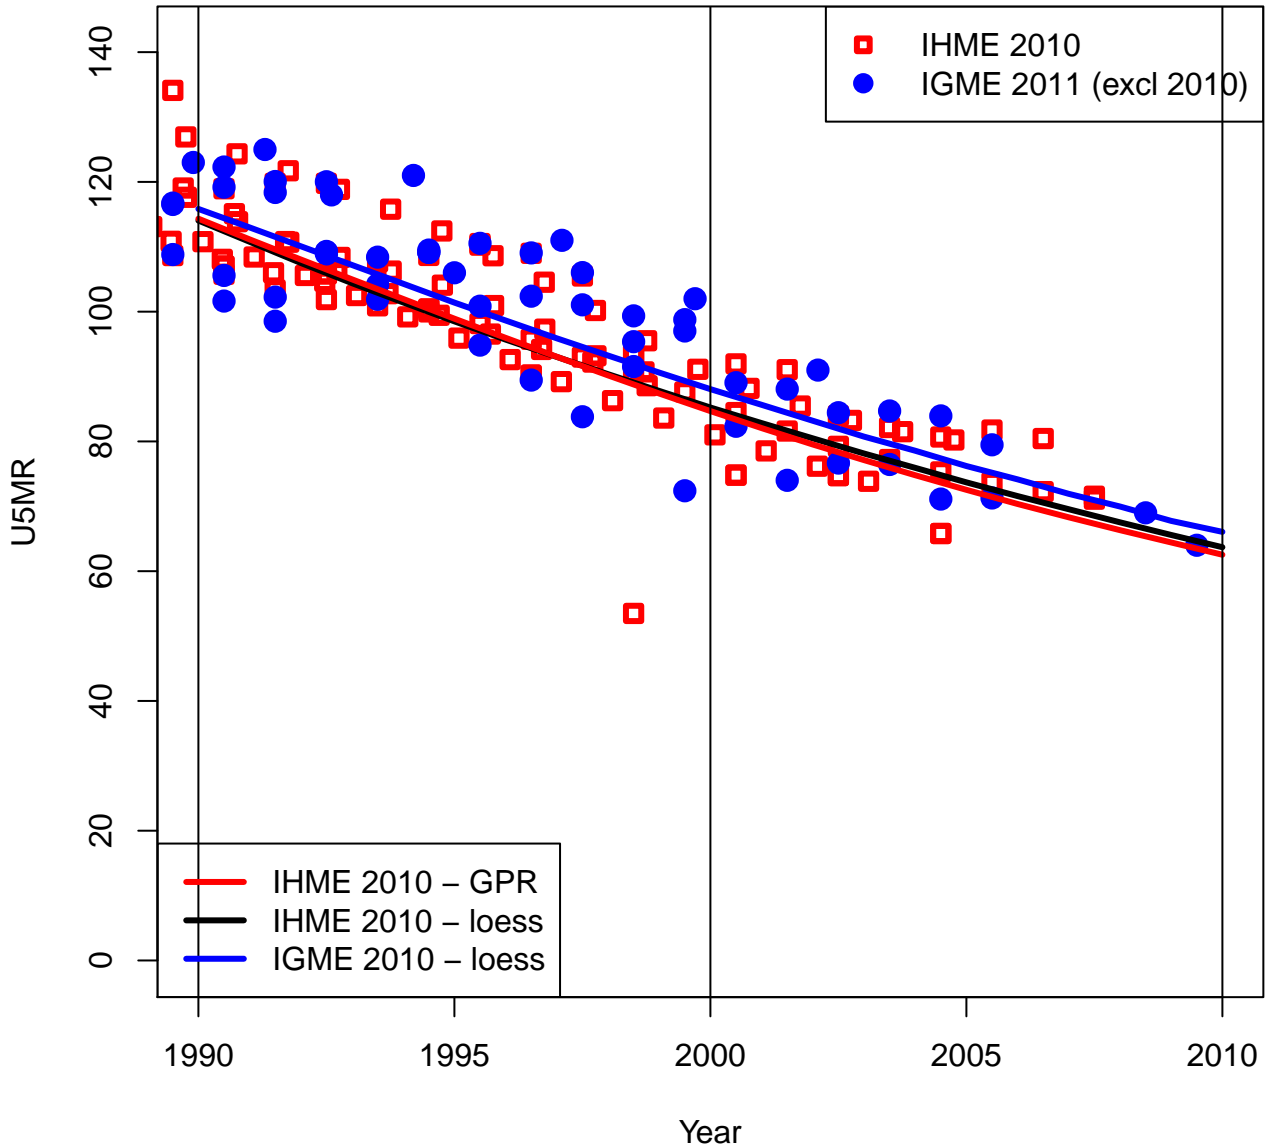

# Indonesia

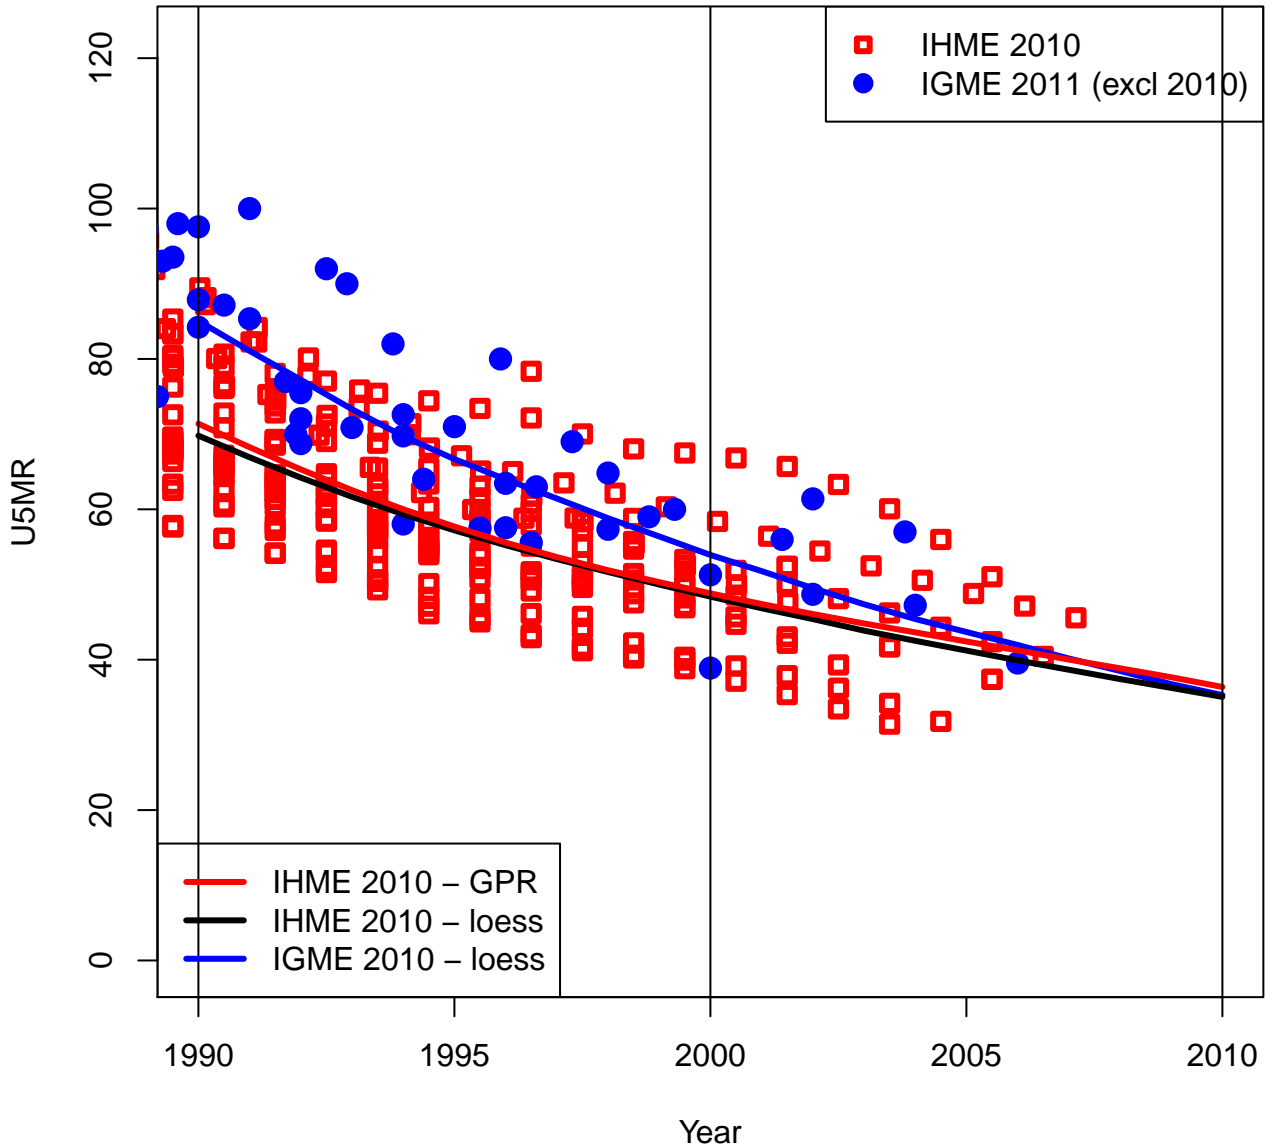

# Kiribati

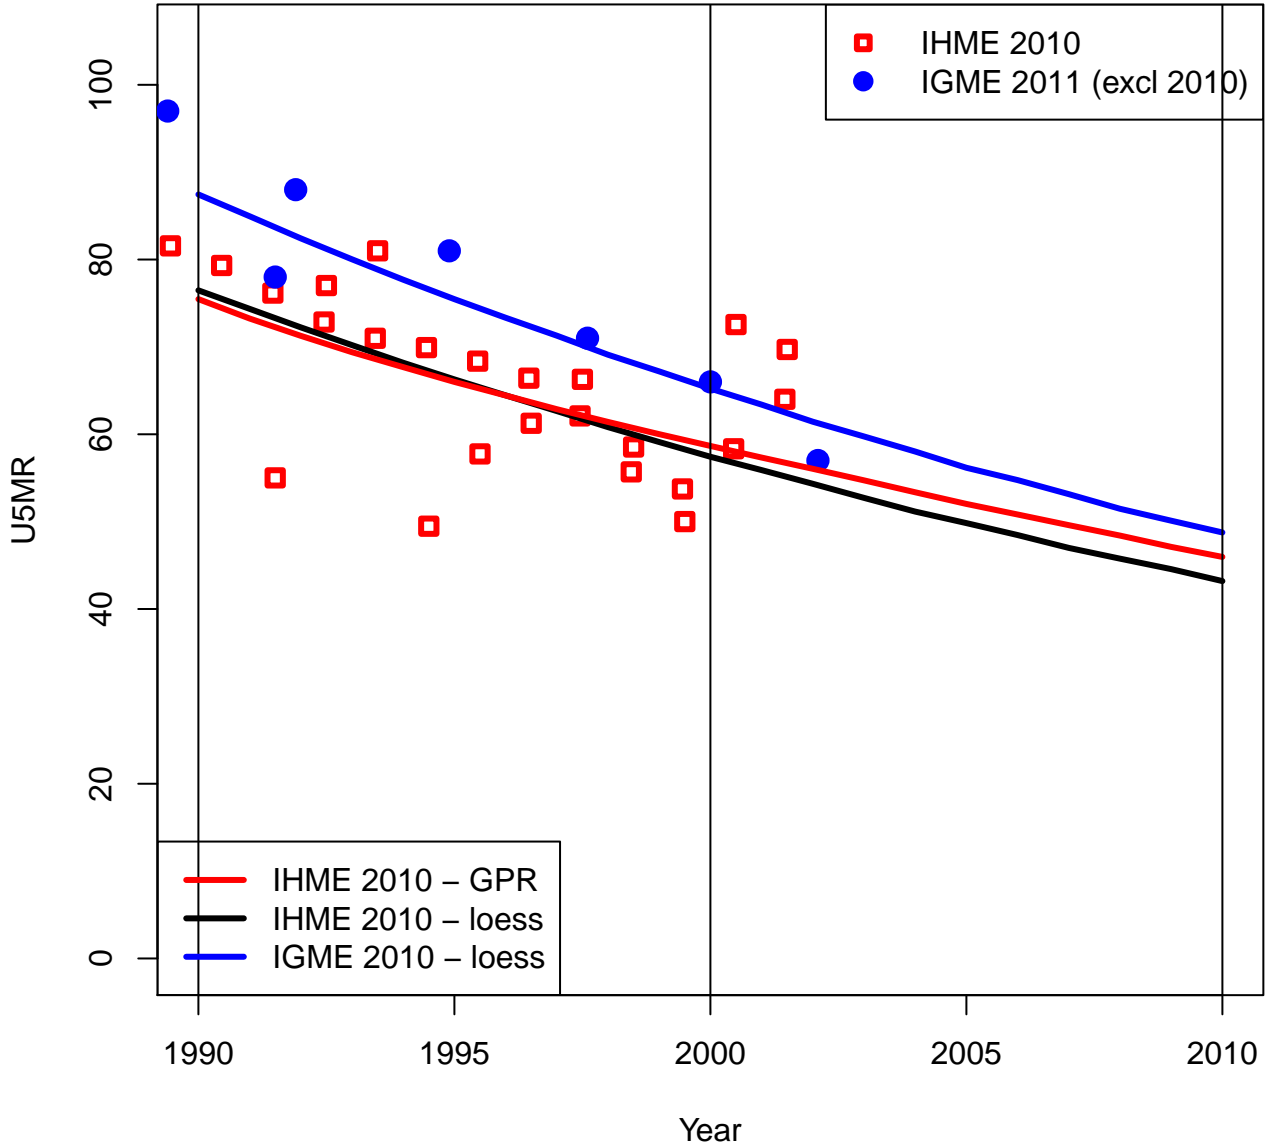

# Lebanon

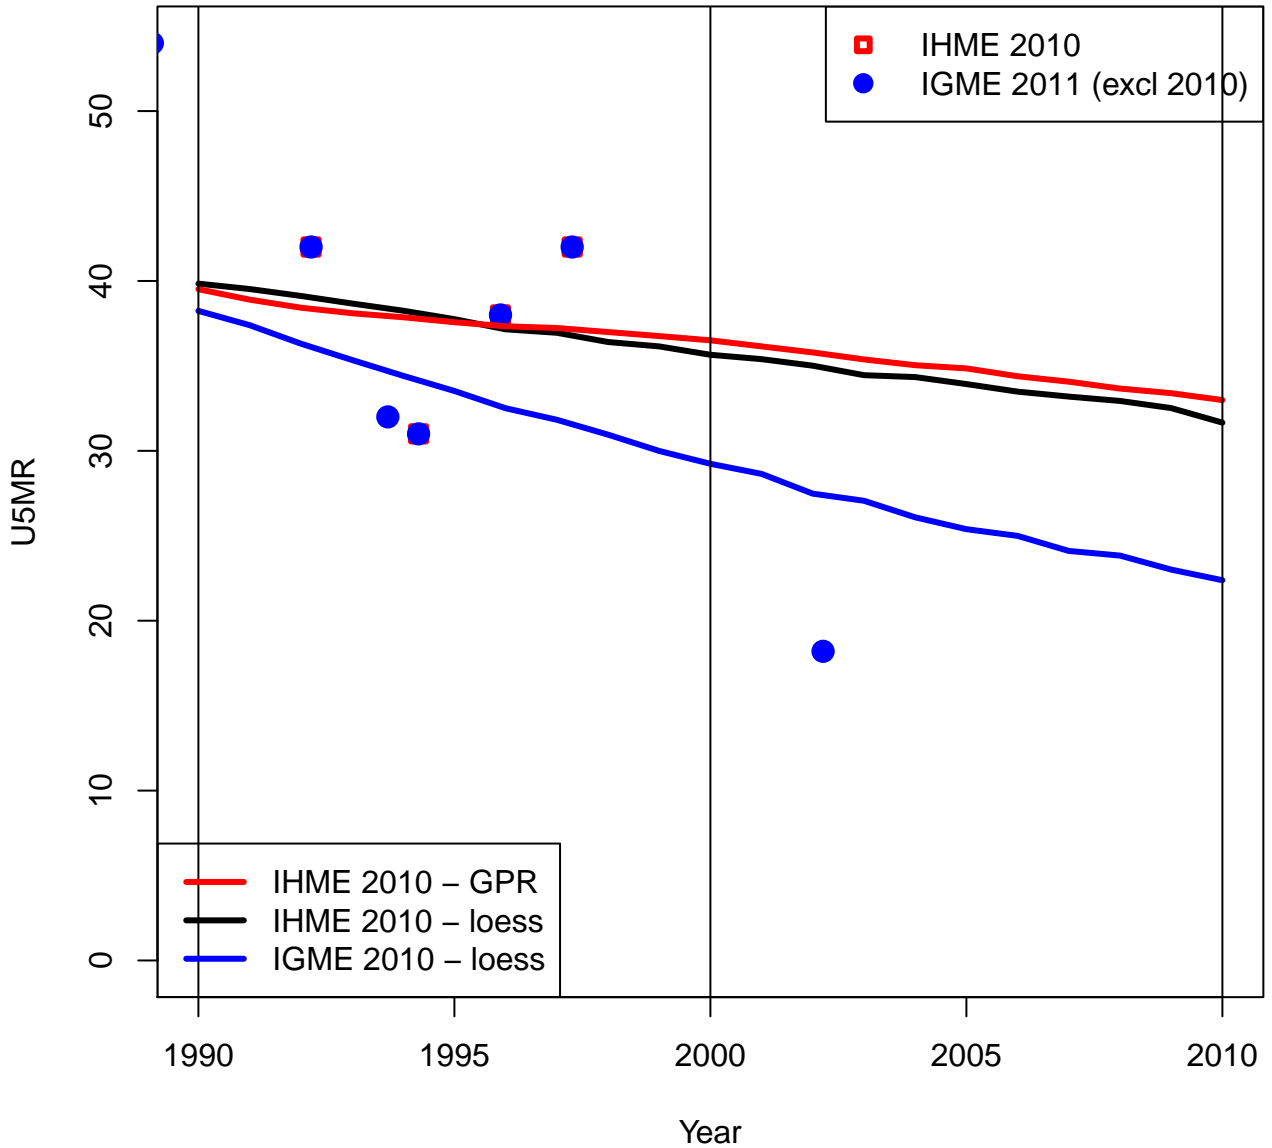

# Madagascar

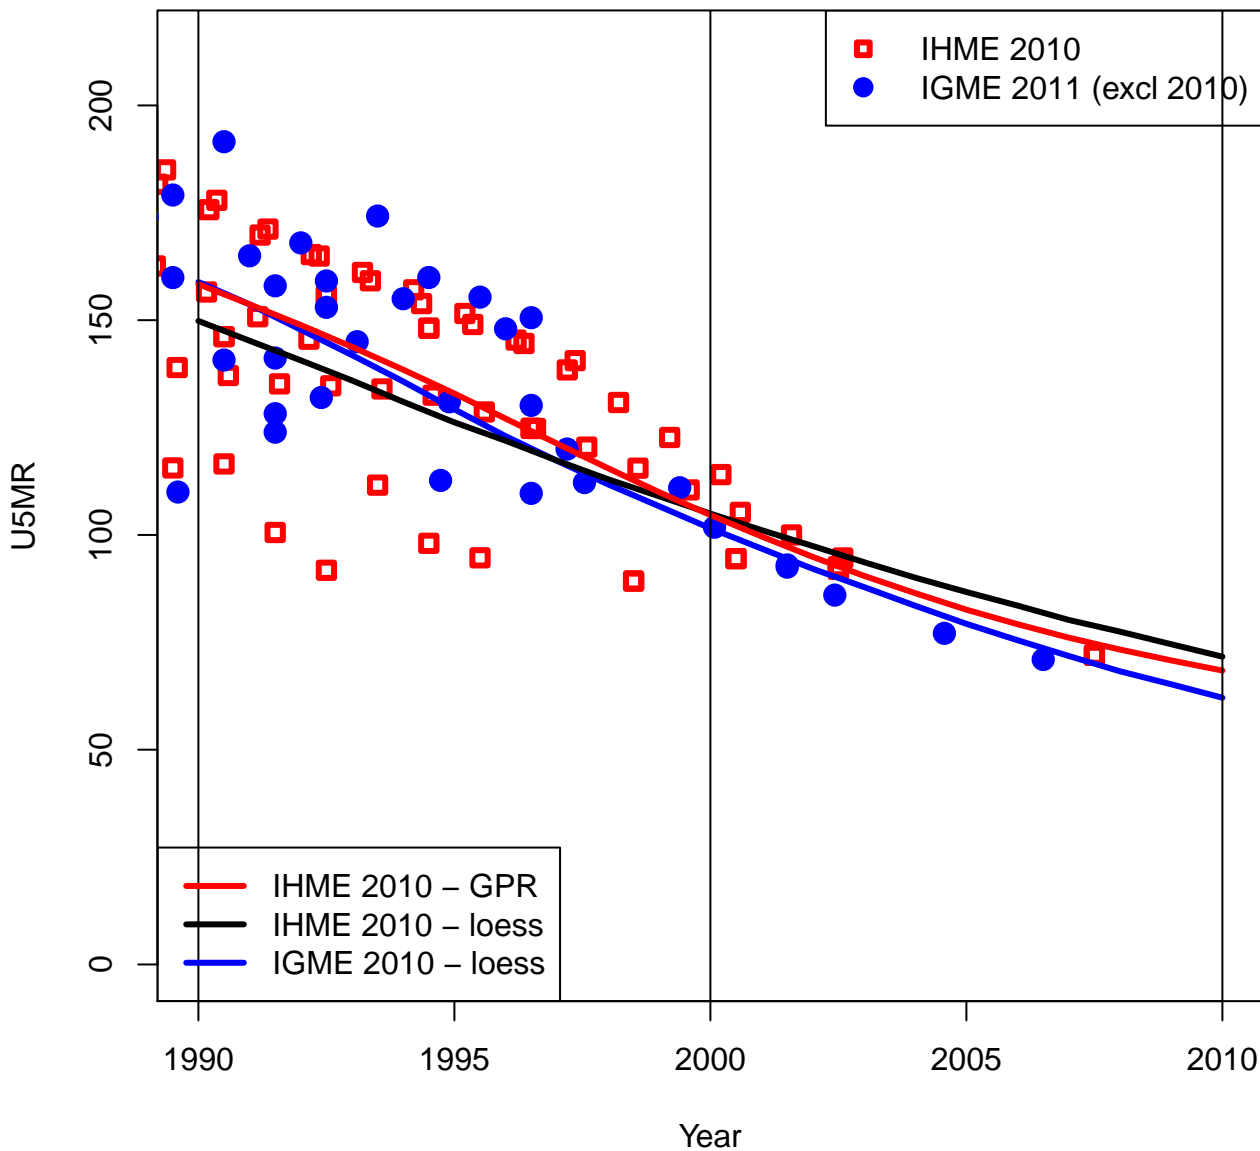

# Mali

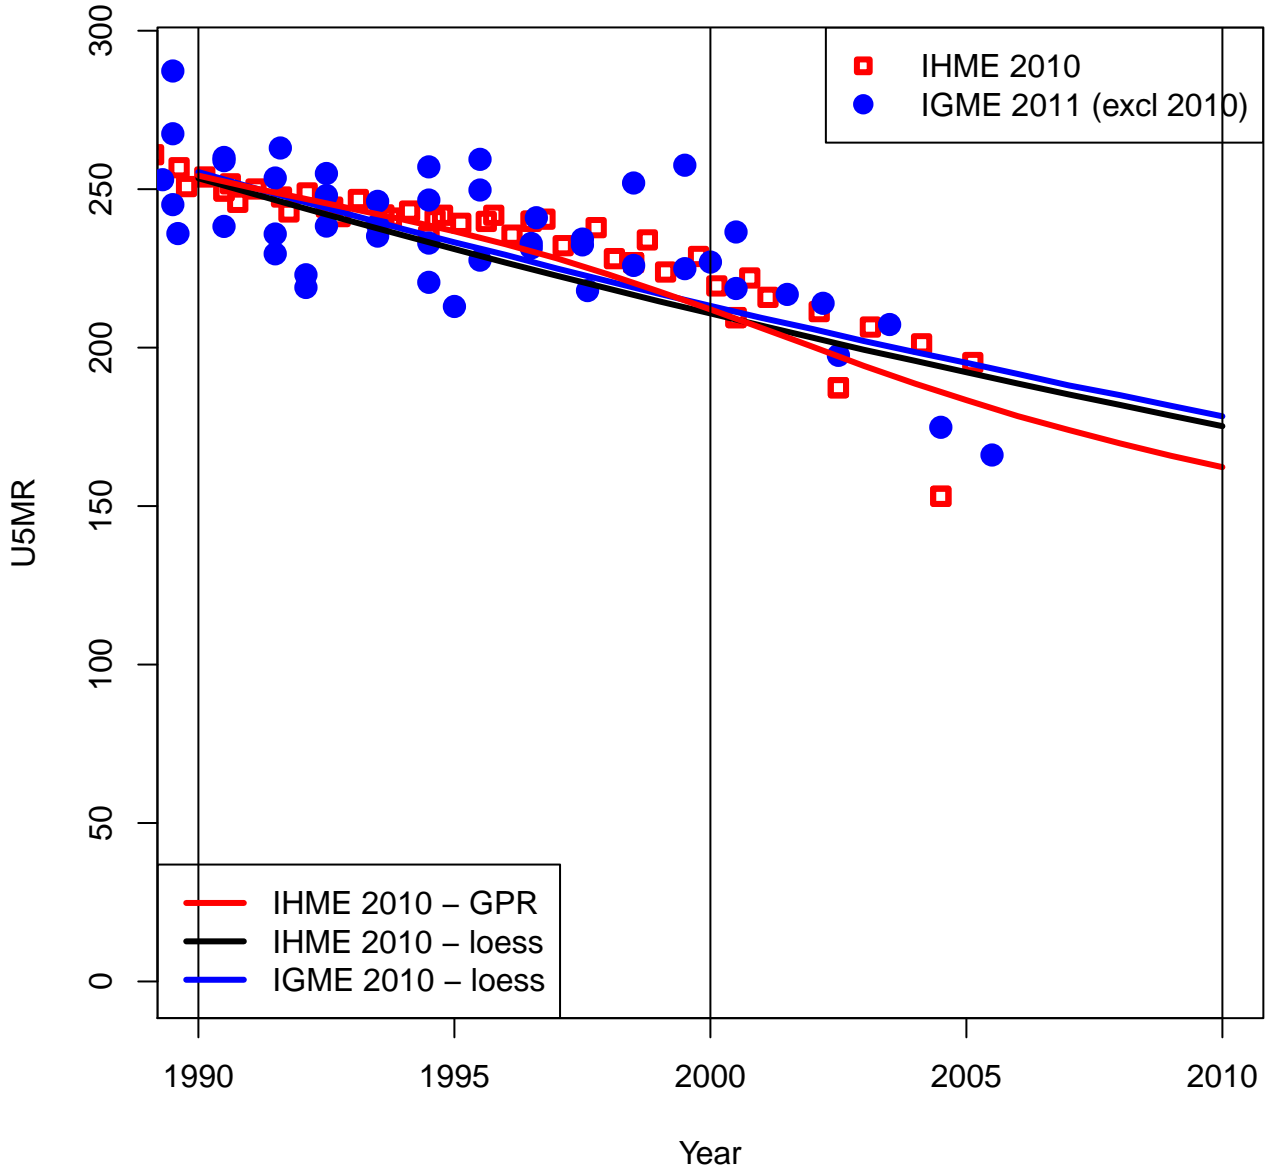

# Marshall Islands

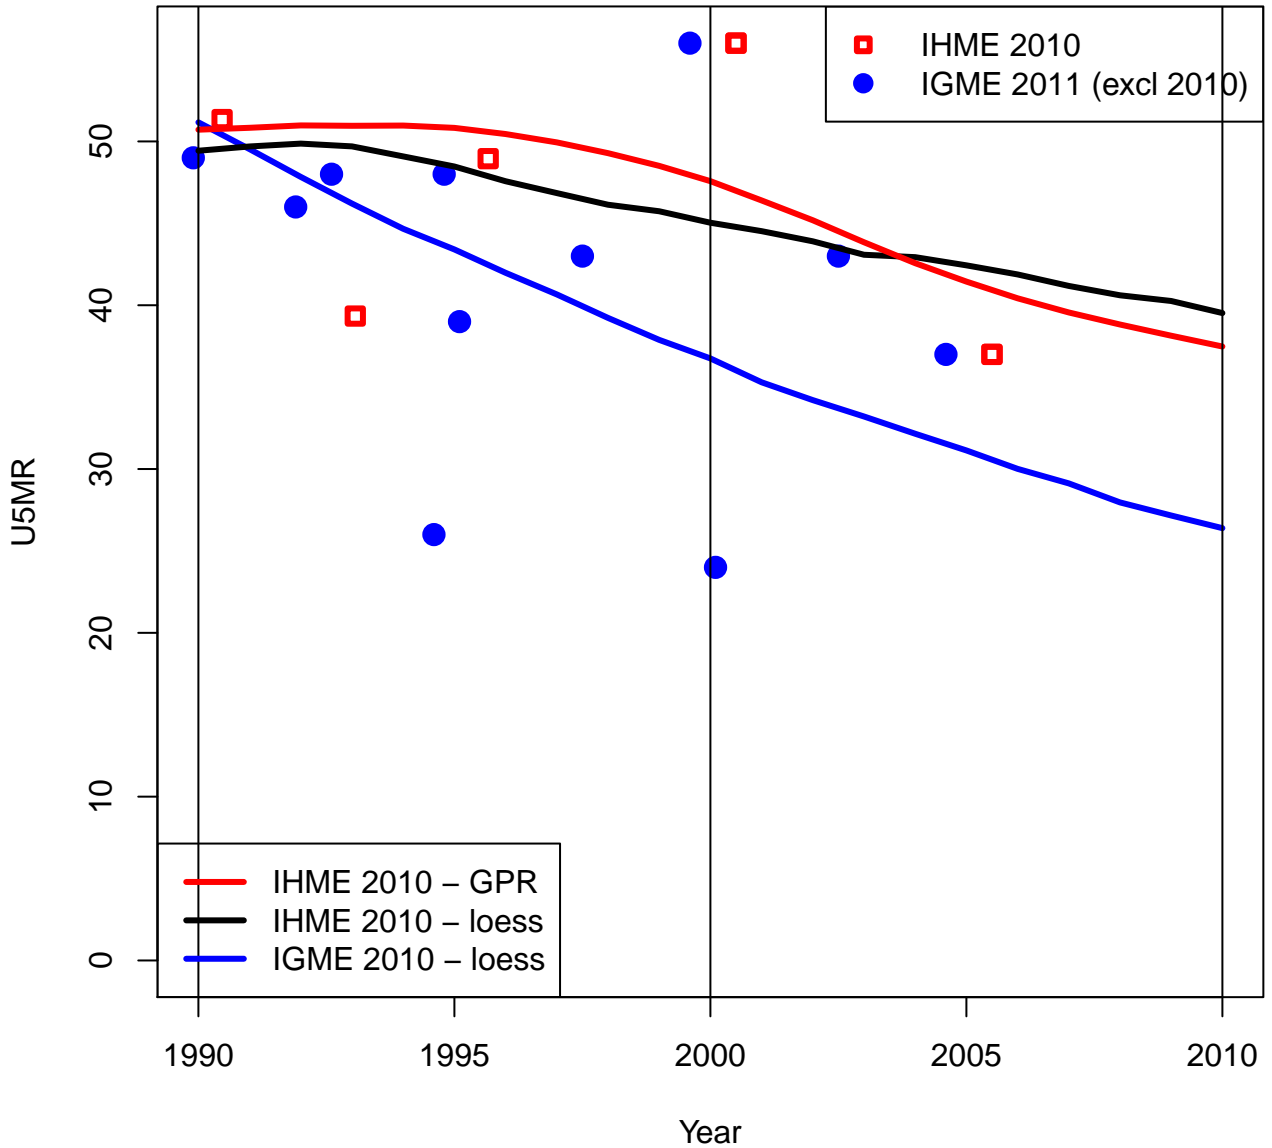

# Mauritania

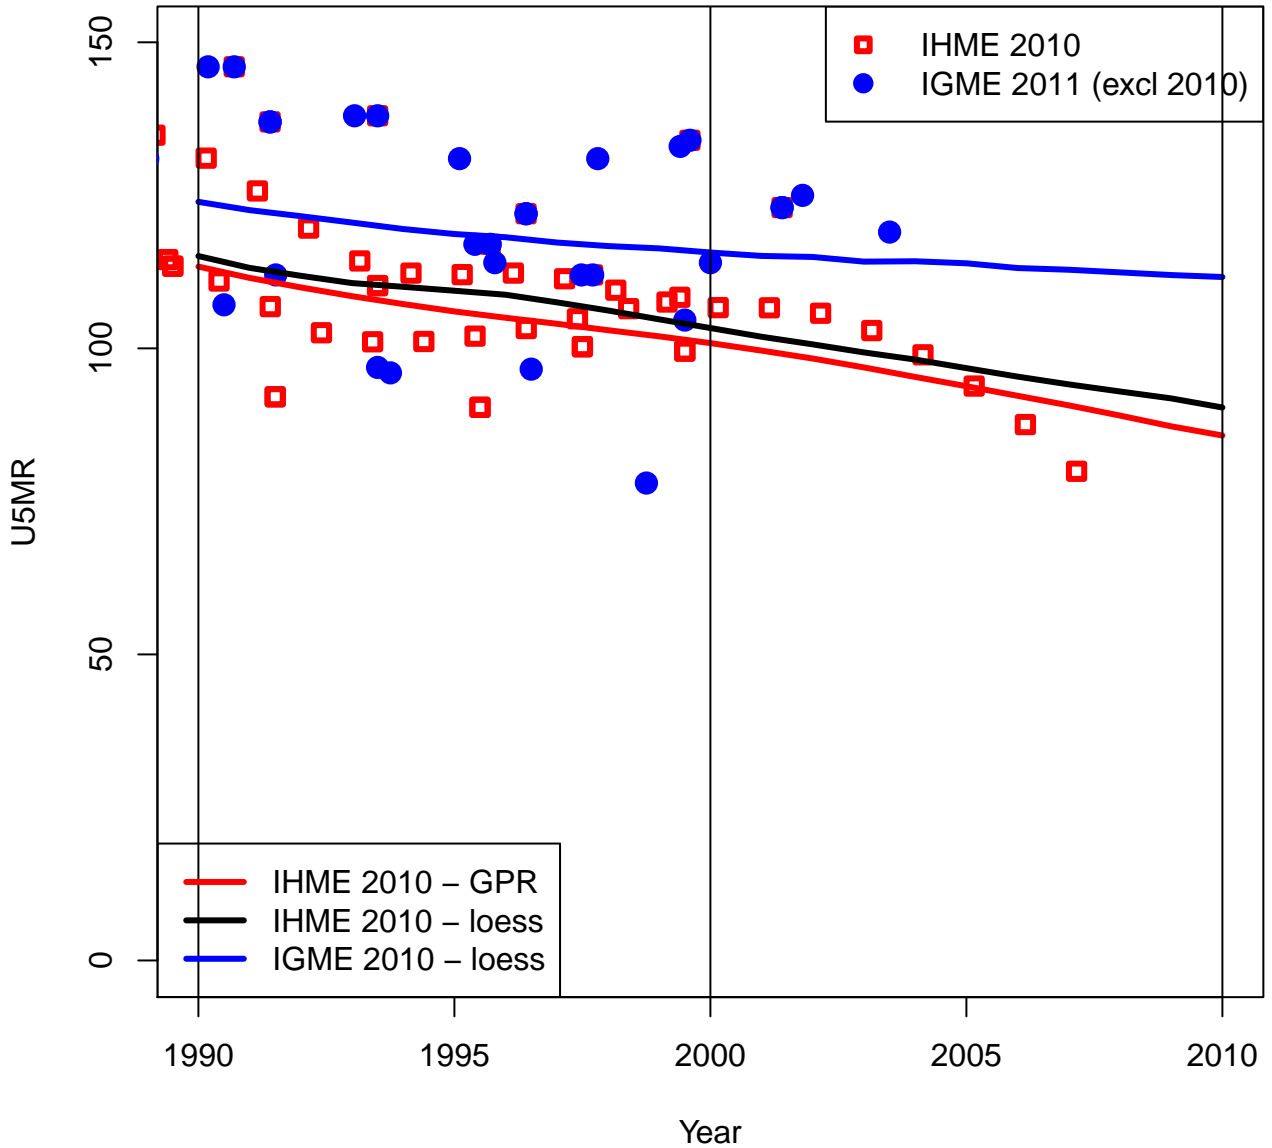



# Myanmar

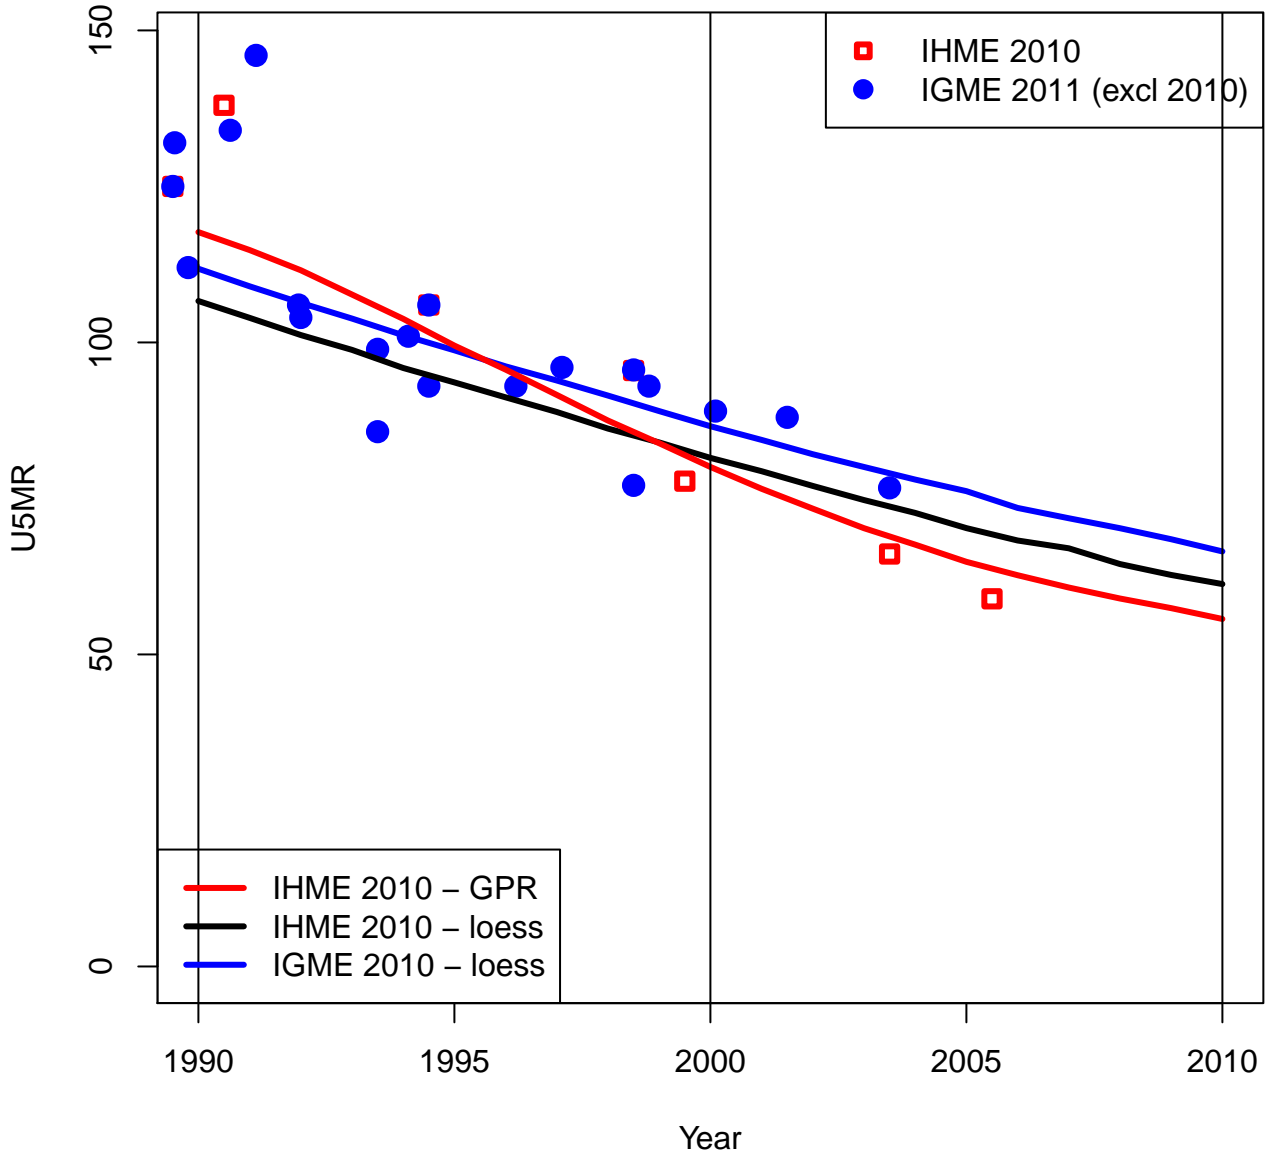

# Nepal

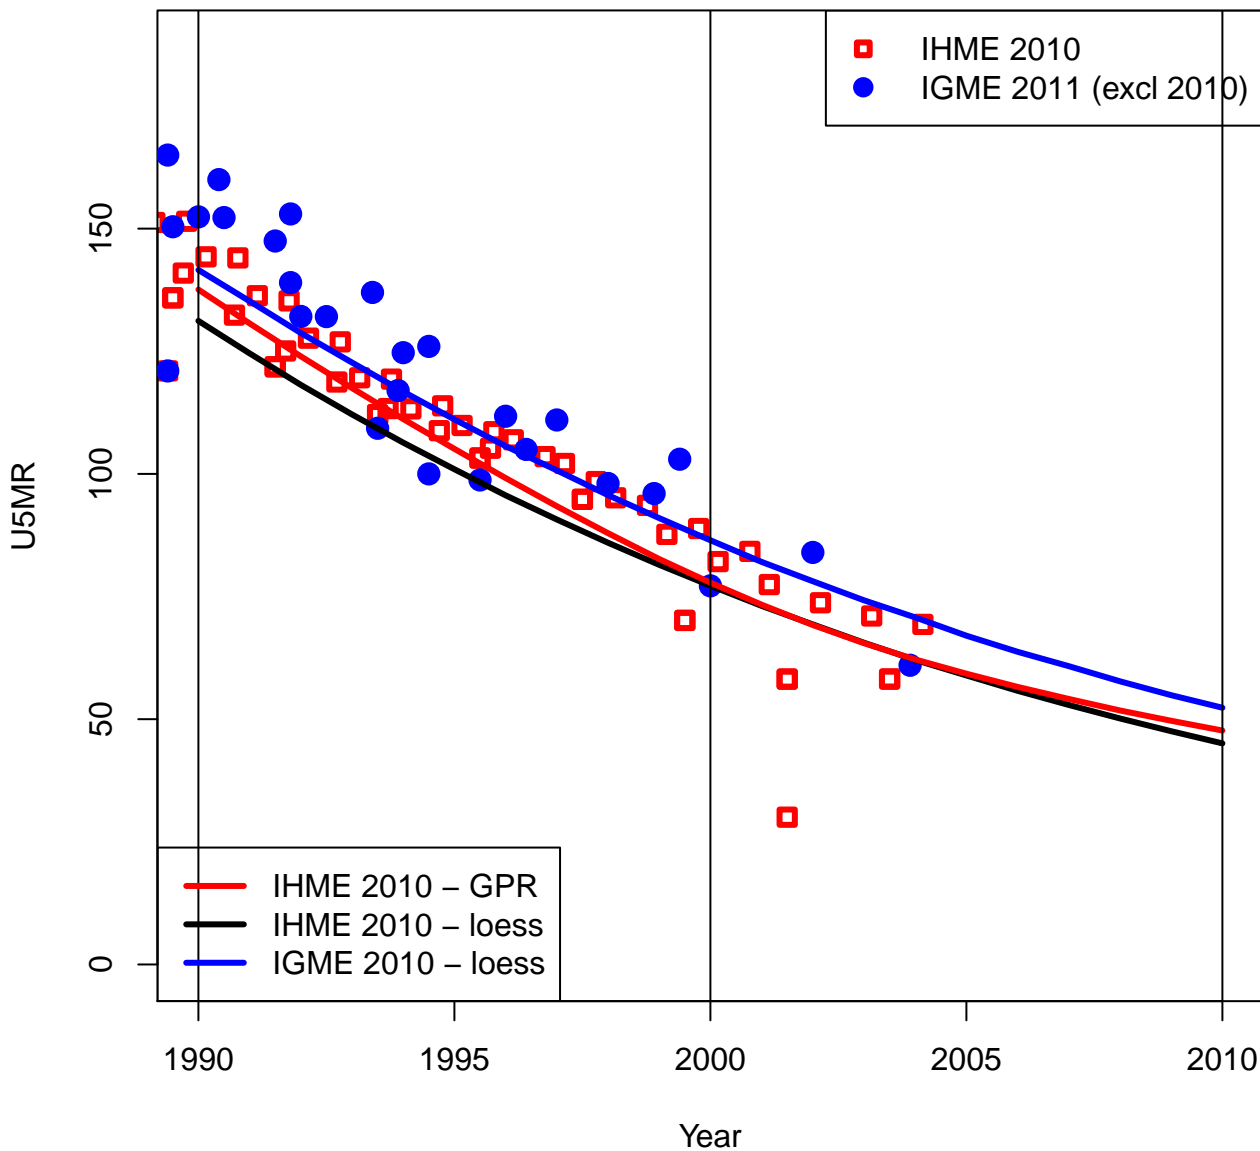

# Pakistan

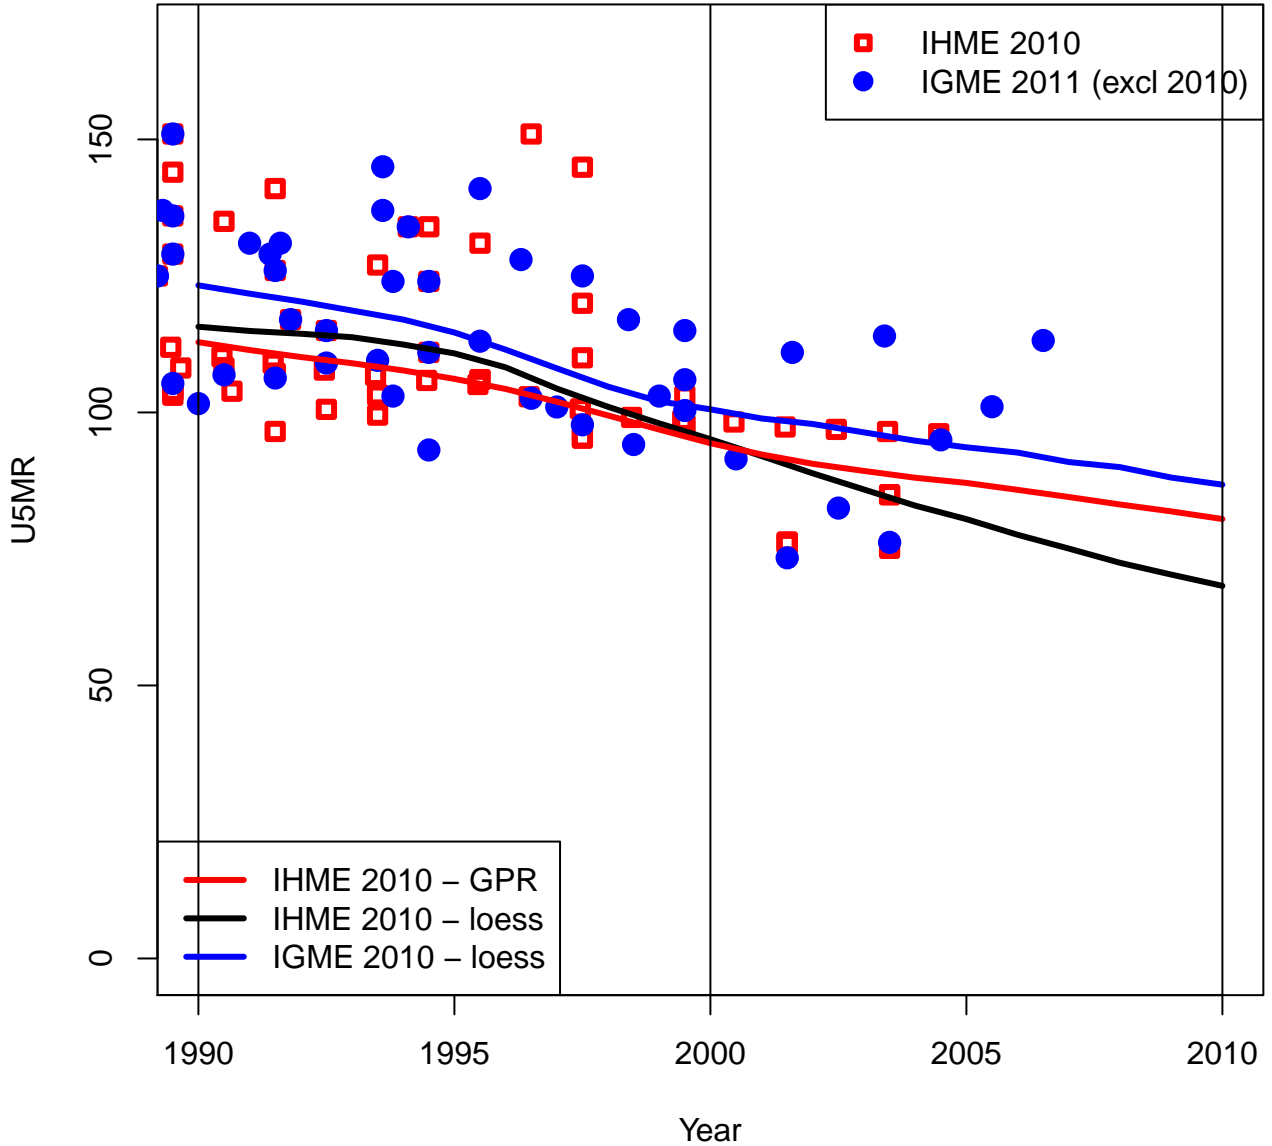

# Papua New Guinea

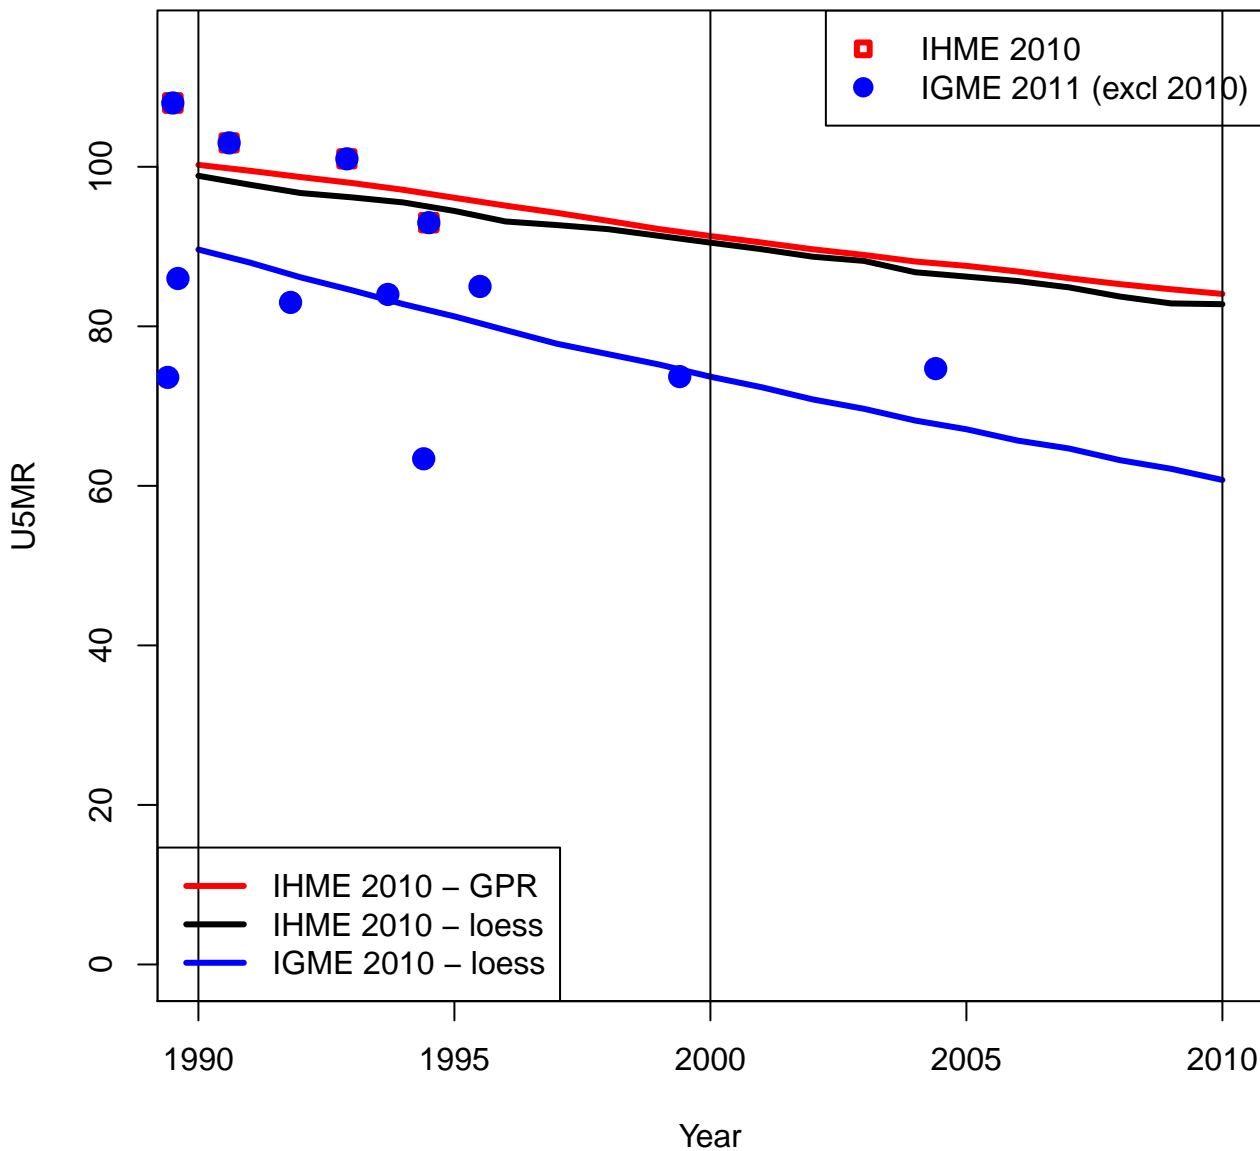

# Senegal

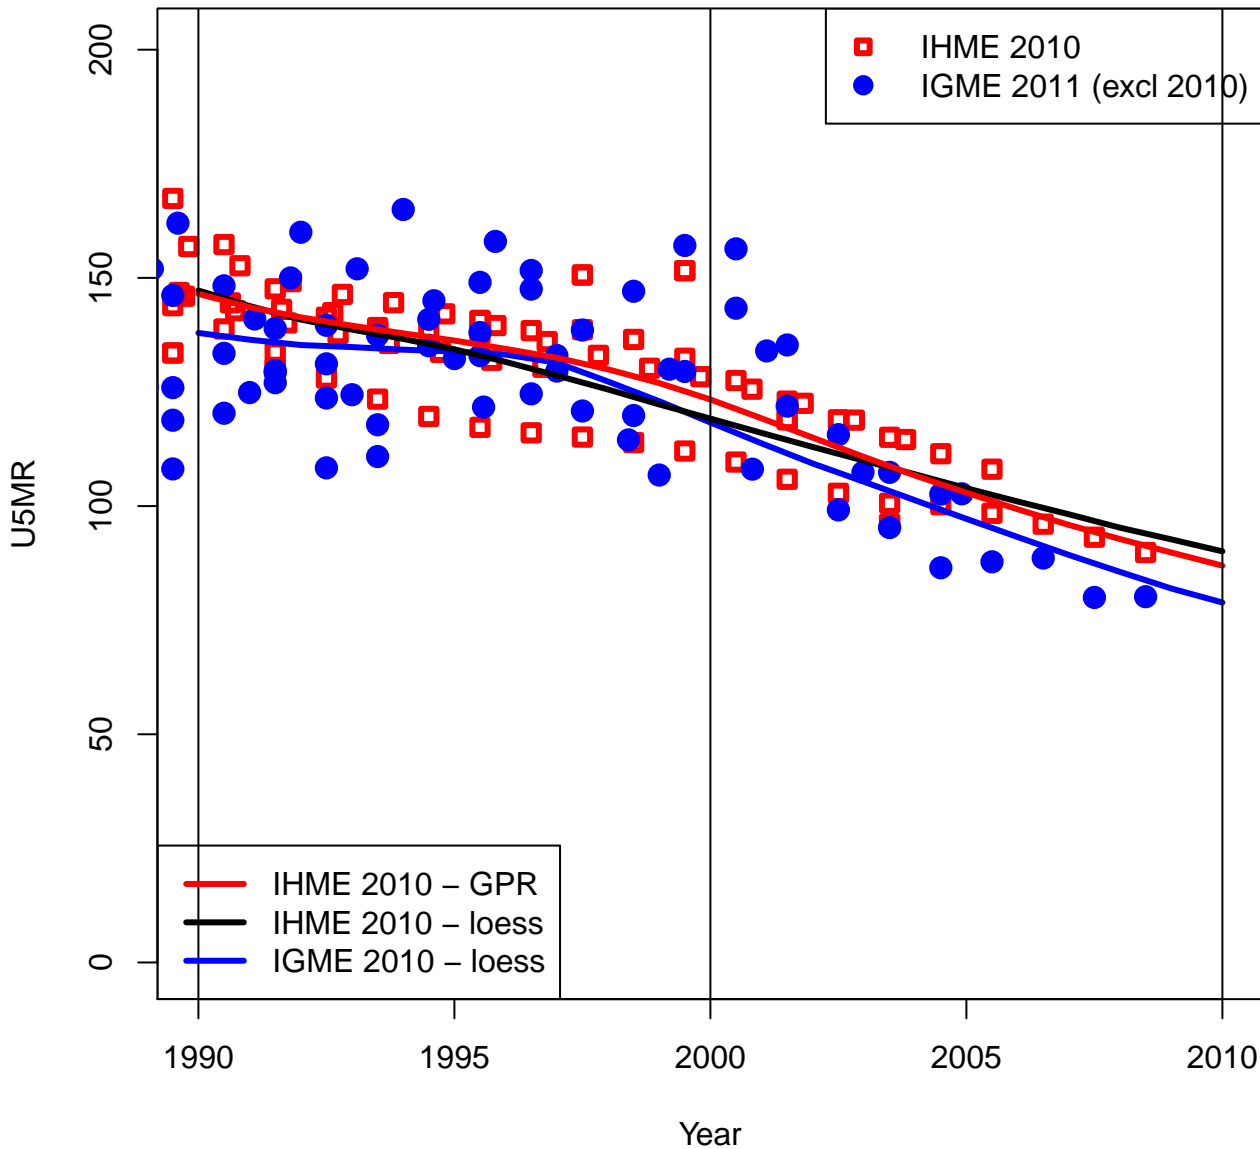

# Solomon Islands

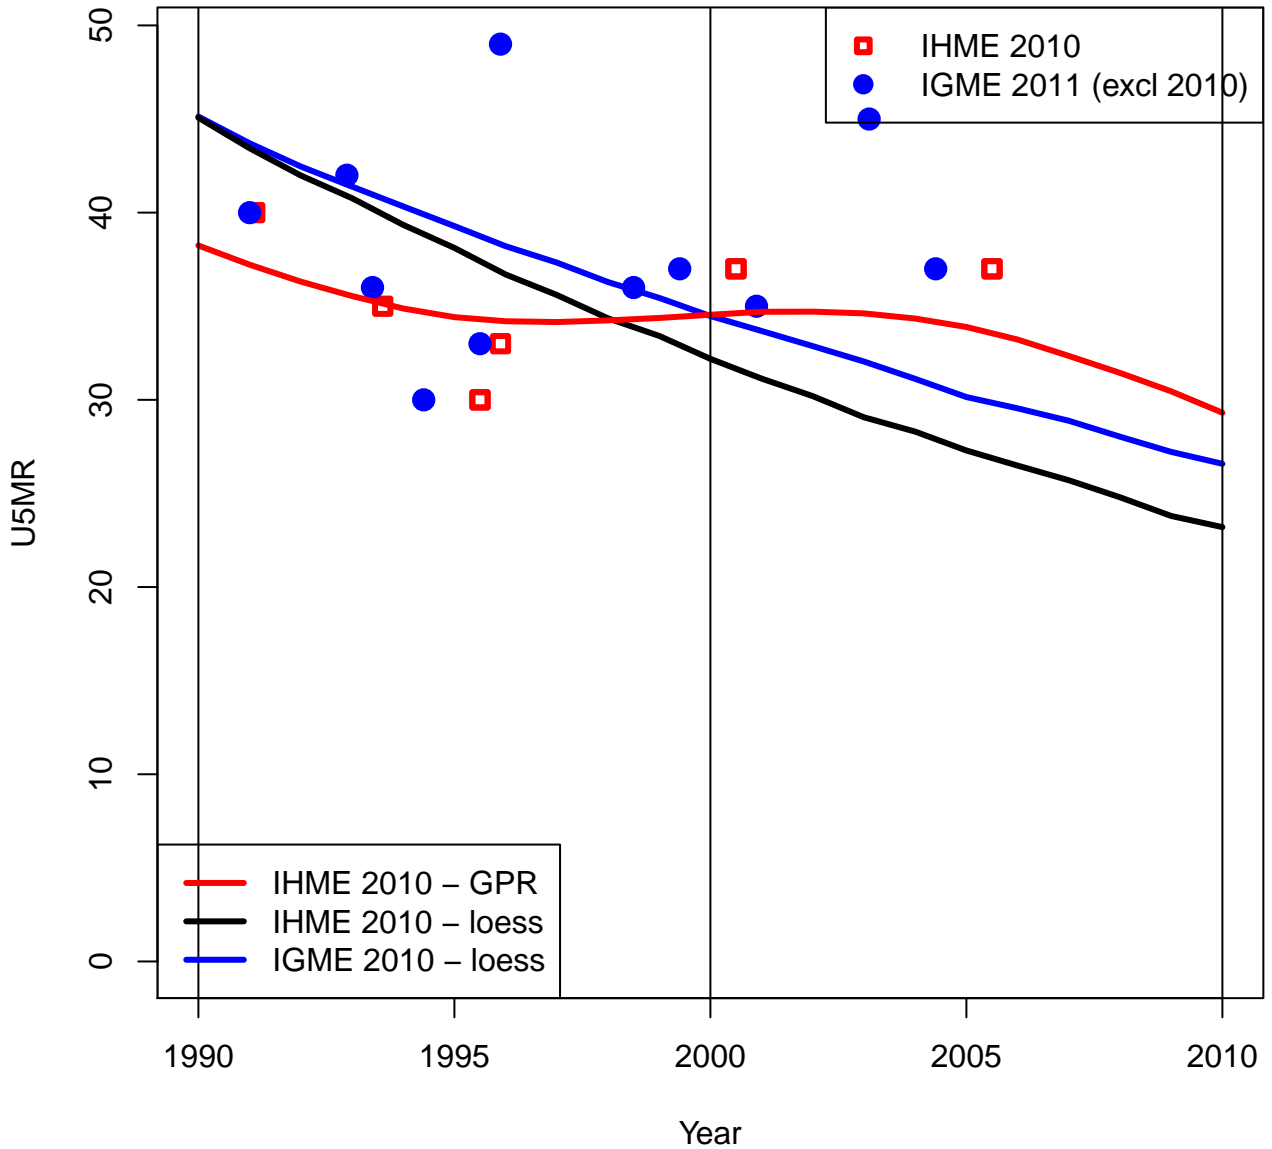

# Sudan

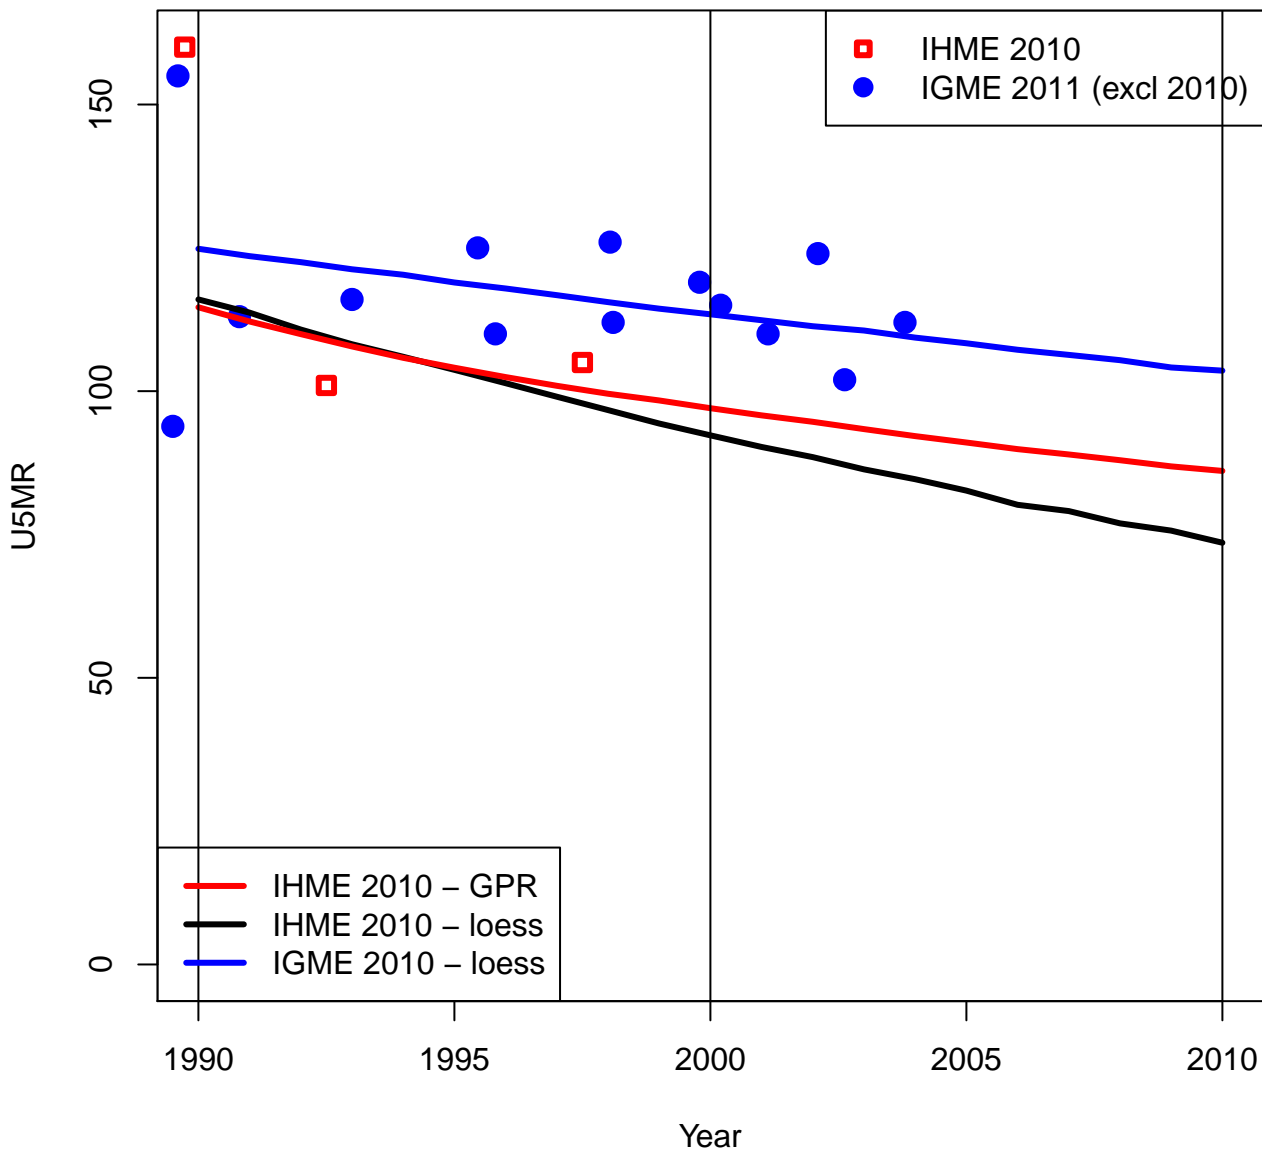

# Timor-Leste

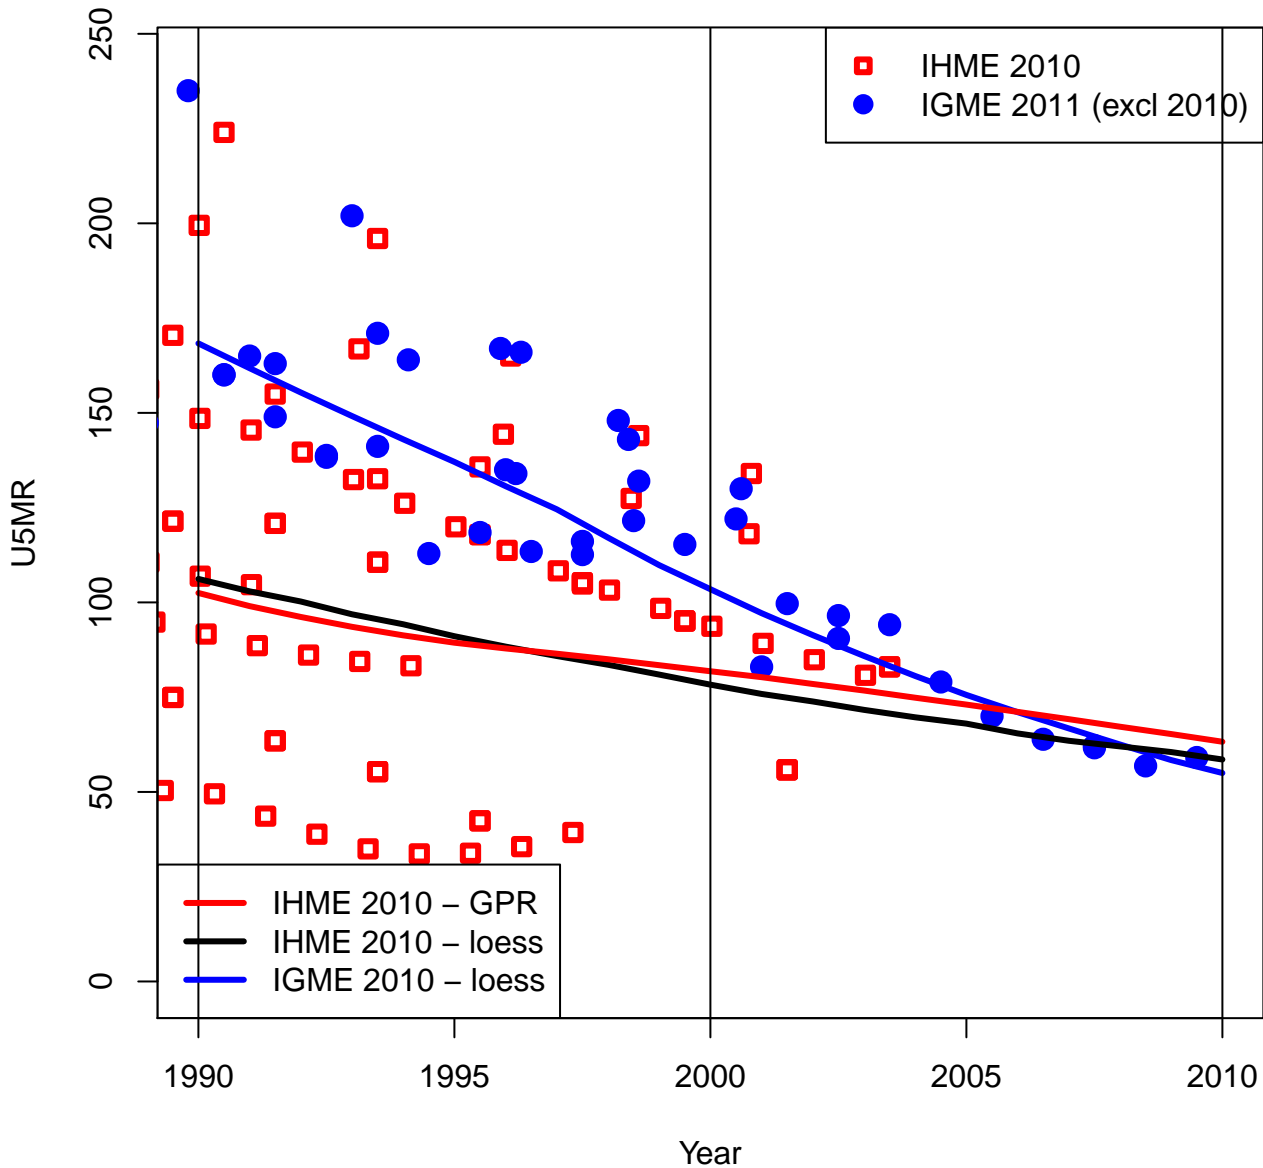



# Togo

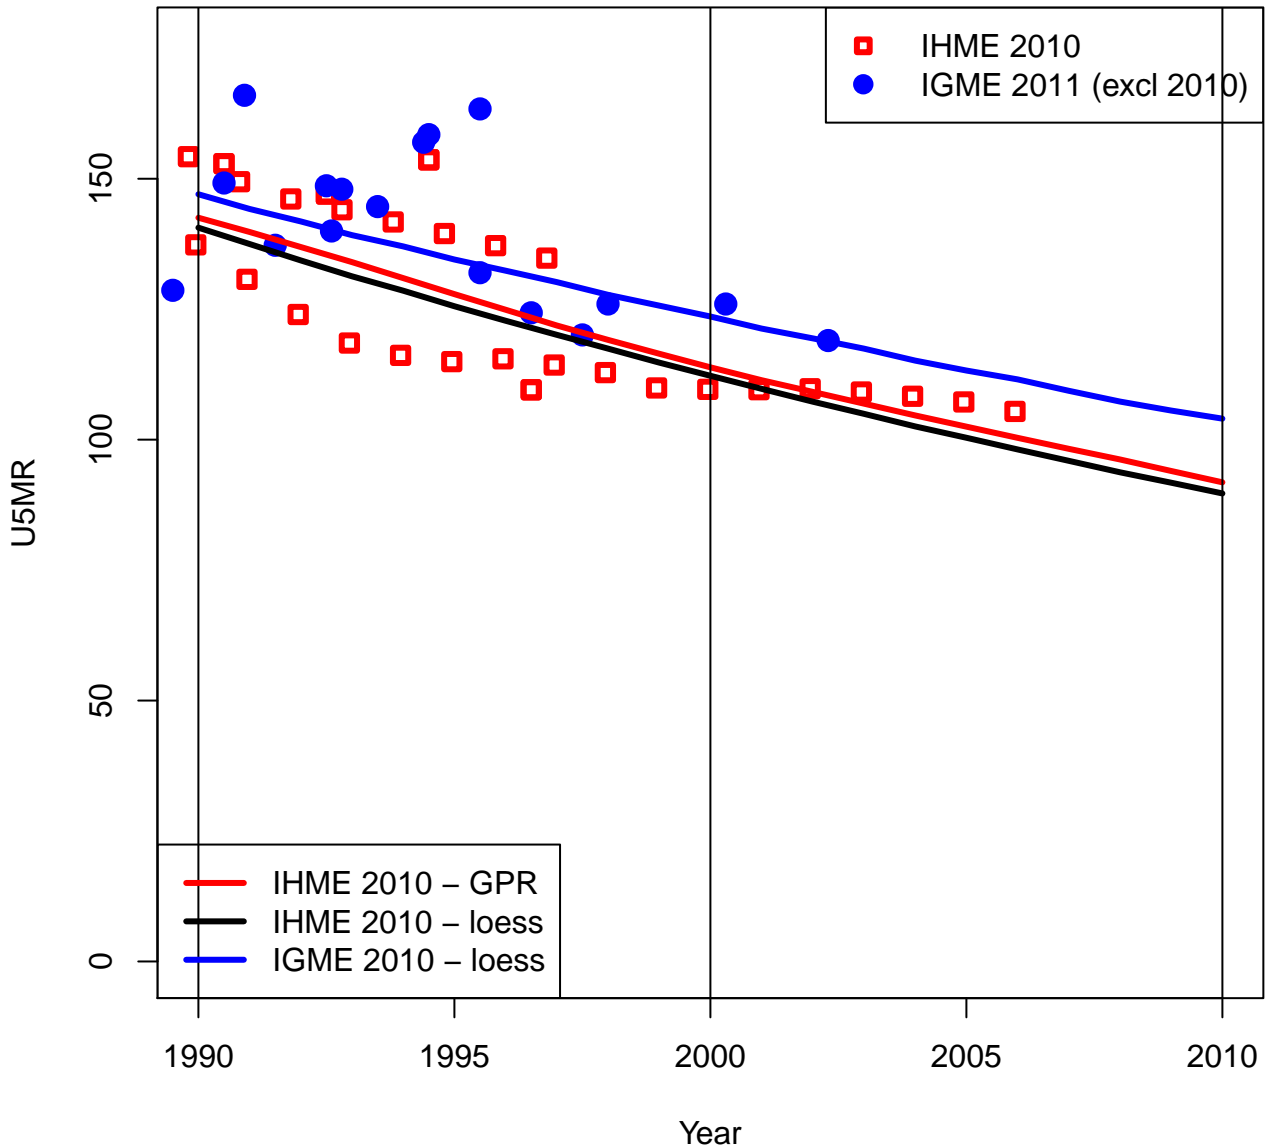

# Vanuatu

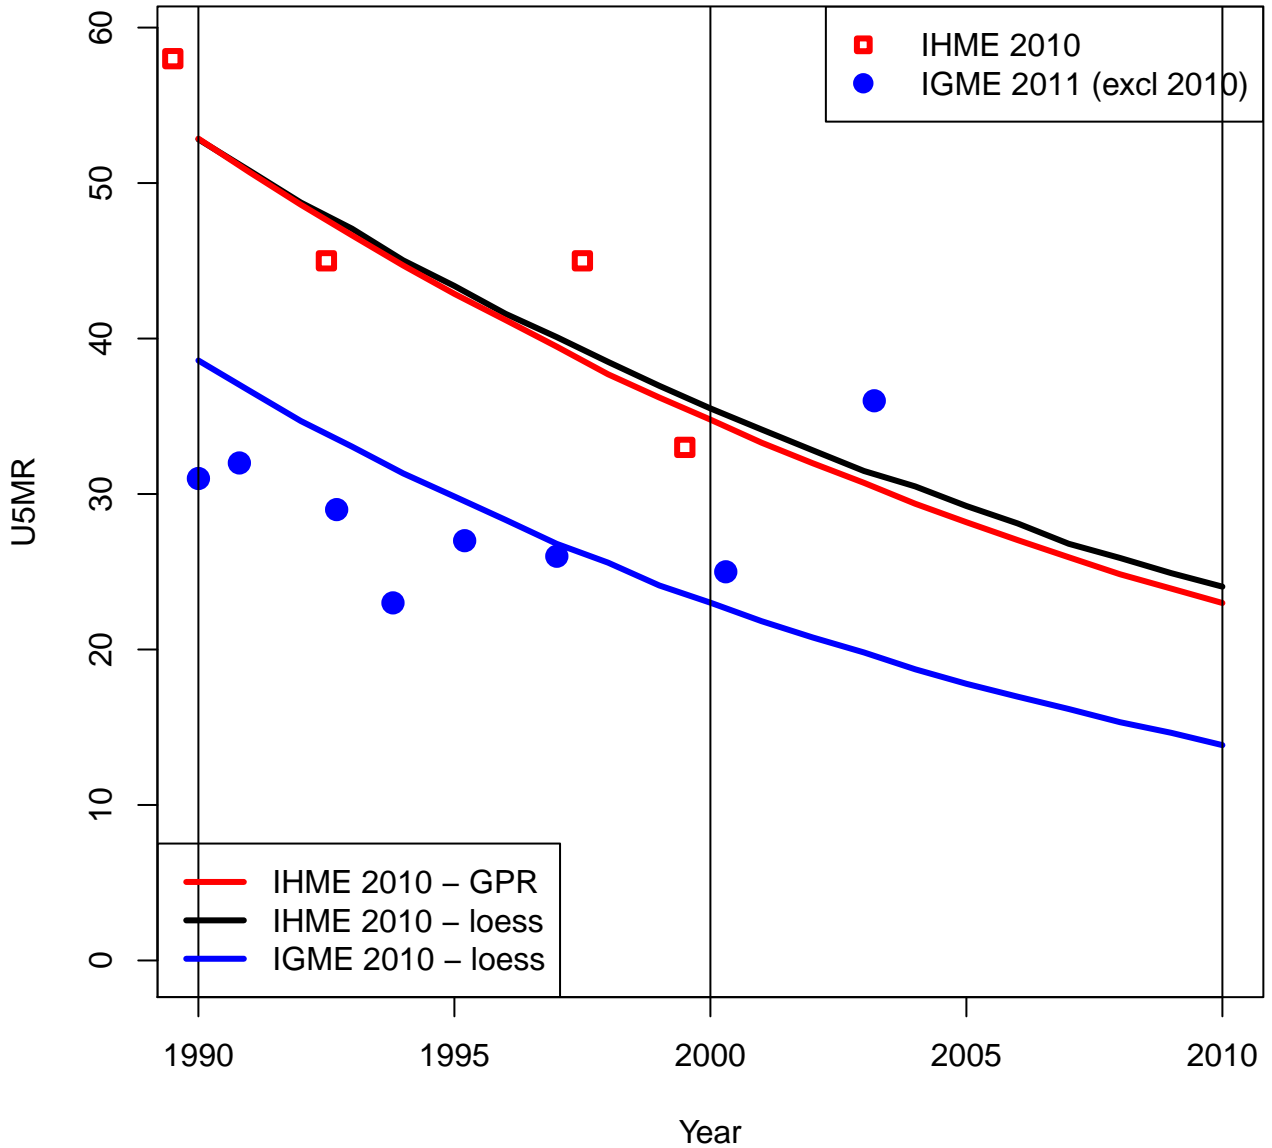

# Viet Nam

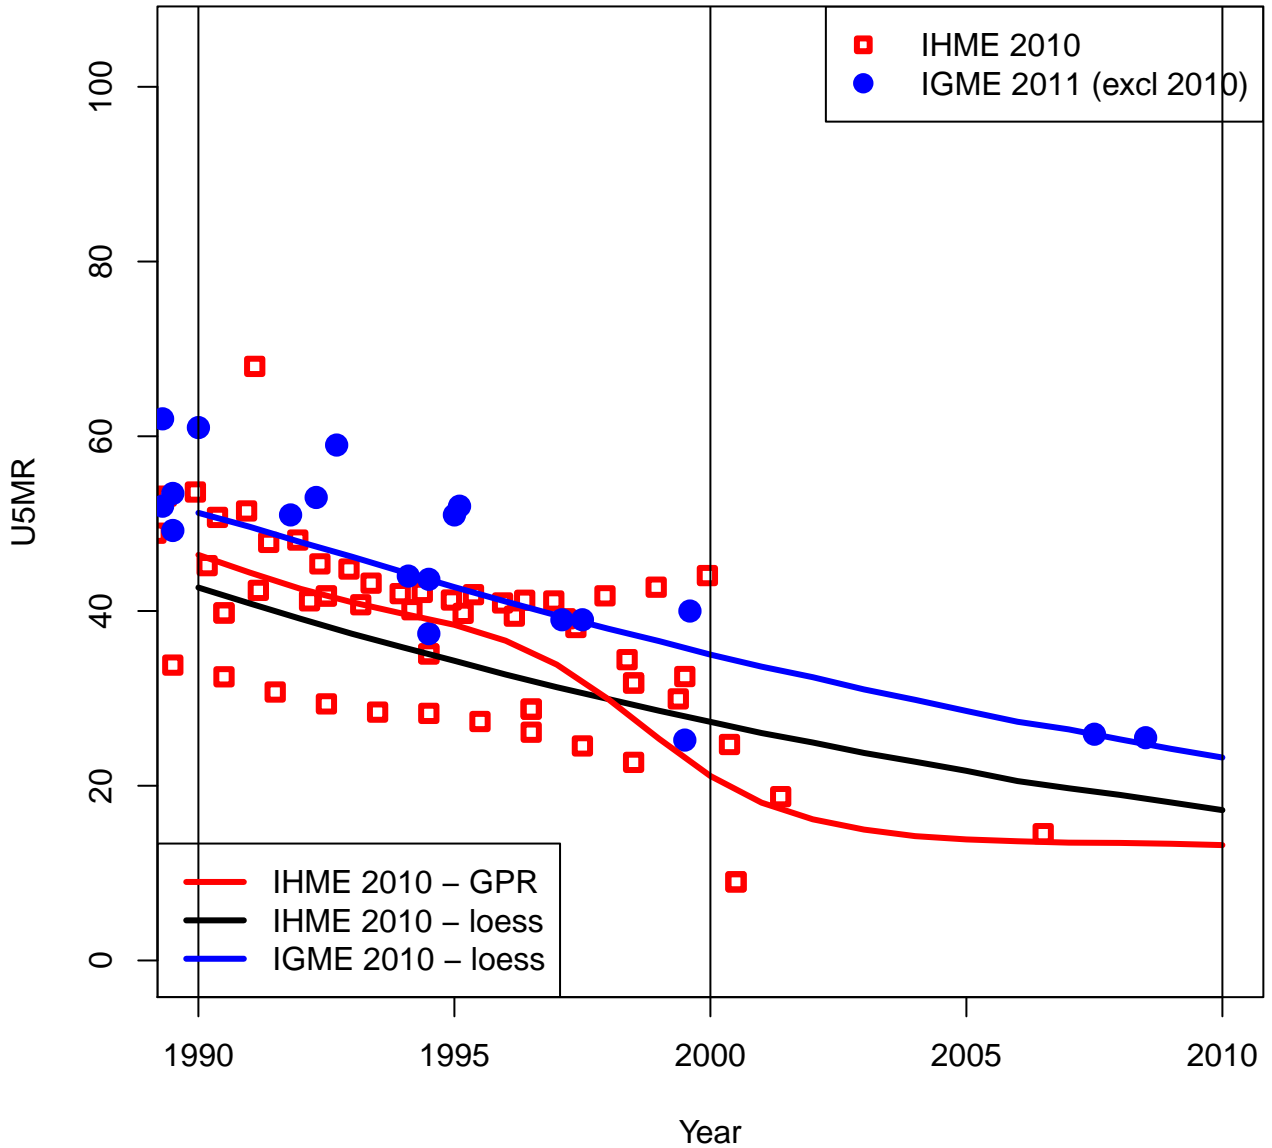

# Yemen

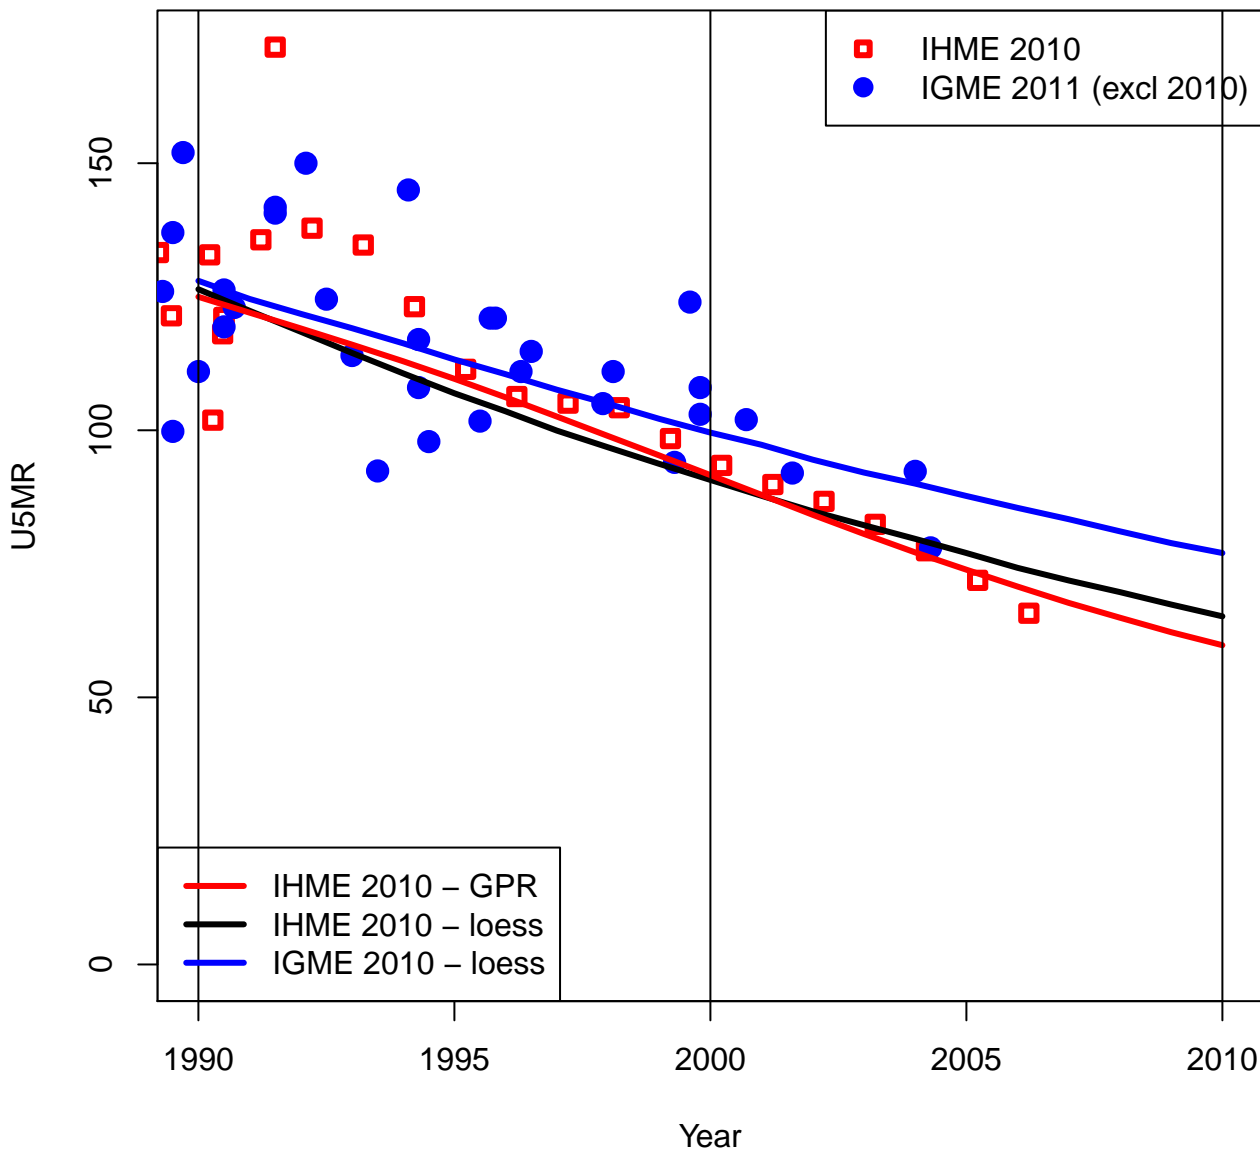

Supplement: pmed.1001288.s002.pdf [file pmed.1001288.s002.pdf]
