# Supplementary material for: Child Mortality Estimation: A Comparison of UN IGME and IHME Estimates of Levels and Trends in Under-Five Mortality Rates and Deaths
Source: PLoS Med. 2012 Aug 28;9(8):e1001288. doi: 10.1371/journal.pmed.1001288 (PMC3429386; doi:10.1371/journal.pmed.1001288)
Supplement: Table S1 — Overview of UN IGME and IHME estimates and their (relative) differences for the U5MR and the number of under-five deaths for 1990, 2000, and 2010. Differences in U5MR estimates of more than 10% or more than ten deaths per 1,000 births, as well as relative differences in the estimates of under-five deaths of more than 10% or more than 10,000 deaths, are highlighted. (PDF) [file pmed.1001288.s003.pdf]

|                          | 1990<br>Under-five mortality rate<br>(deaths per 1,000 live births) |       |       |          | 2000<br>Under-five mortality rate<br>(deaths per 1,000 live births) |       |       |          | 2010<br>Under-five mortality rate<br>(deaths per 1,000 live births) |       |       |          |
|--------------------------|---------------------------------------------------------------------|-------|-------|----------|---------------------------------------------------------------------|-------|-------|----------|---------------------------------------------------------------------|-------|-------|----------|
| Country                  | IGME                                                                | IHME  | Diff  | Diff (%) | IGME                                                                | IHME  | Diff  | Diff (%) | IGME                                                                | IHME  | Diff  | Diff (%) |
| Afghanistan              | 208.7                                                               | 156.8 | -51.9 | -24.9    | 151.1                                                               | 154.3 | 3.2   | 2.1      | 149.2                                                               | 113.4 | -35.8 | -24.0    |
| Albania                  | 41.1                                                                | 40.5  | -0.6  | -1.5     | 28.6                                                                | 24.5  | -4.1  | -14.3    | 18.4                                                                | 15    | -3.4  | -18.5    |
| Algeria                  | 67.6                                                                | 54.4  | -13.2 | -19.5    | 48.9                                                                | 34.1  | -14.8 | -30.3    | 36                                                                  | 20.4  | -15.6 | -43.3    |
| Andorra                  | 8.8                                                                 | 7.8   | -1    | -11.4    | 4.9                                                                 | 5.5   | 0.6   | 12.2     | 3.8                                                                 | 3.8   | 0     | 0.0      |
| Angola                   | 243                                                                 | 239.4 | -3.6  | -1.5     | 199.6                                                               | 200   | 0.4   | 0.2      | 160.5                                                               | 137.2 | -23.3 | -14.5    |
| Antigua and Barbuda      | 26.2                                                                | 19.1  | -7.1  | -27.1    | 14.9                                                                | 21.3  | 6.4   | 43.0     | 8.1                                                                 | 13.3  | 5.2   | 64.2     |
| Argentina                | 26.9                                                                | 28.5  | 1.6   | 5.9      | 19.6                                                                | 19.4  | -0.2  | -1.0     | 13.8                                                                | 14.7  | 0.9   | 6.5      |
| Armenia                  | 54.5                                                                | 49.4  | -5.1  | -9.4     | 33.3                                                                | 31.1  | -2.2  | -6.6     | 19.6                                                                | 16.8  | -2.8  | -14.3    |
| Australia                | 9.1                                                                 | 9.6   | 0.5   | 5.5      | 6.2                                                                 | 6.3   | 0.1   | 1.6      | 4.9                                                                 | 4.7   | -0.2  | -4.1     |
| Austria                  | 9.4                                                                 | 9.8   | 0.4   | 4.3      | 5.6                                                                 | 5.5   | -0.1  | -1.8     | 4.2                                                                 | 4.4   | 0.2   | 4.8      |
| Azerbaijan               | 92.9                                                                | 77.8  | -15.1 | -16.3    | 67.4                                                                | 56.8  | -10.6 | -15.7    | 45.9                                                                | 40.6  | -5.3  | -11.5    |
| Bahamas                  | 22                                                                  | 32    | 10    | 45.5     | 16.8                                                                | 17.8  | 1     | 6.0      | 16.1                                                                | 17.8  | 1.7   | 10.6     |
| Bahrain                  | 17                                                                  | 19.9  | 2.9   | 17.1     | 12.2                                                                | 11.4  | -0.8  | -6.6     | 10.2                                                                | 7.2   | -3    | -29.4    |
| Bangladesh               | 143.4                                                               | 137.2 | -6.2  | -4.3     | 85.7                                                                | 85.9  | 0.2   | 0.2      | 47.8                                                                | 56.4  | 8.6   | 18.0     |
| Barbados                 | 17.9                                                                | 24.2  | 6.3   | 35.2     | 17.1                                                                | 21.2  | 4.1   | 24.0     | 19.6                                                                | 16.1  | -3.5  | -17.9    |
| Belarus                  | 17.2                                                                | 21.7  | 4.5   | 26.2     | 13.7                                                                | 17.5  | 3.8   | 27.7     | 6                                                                   | 9.6   | 3.6   | 60.0     |
| Belgium                  | 10                                                                  | 10.3  | 0.3   | 3.0      | 5.8                                                                 | 6.1   | 0.3   | 5.2      | 4.4                                                                 | 4.4   | 0     | 0.0      |
| Belize                   | 44                                                                  | 39.5  | -4.5  | -10.2    | 27                                                                  | 28.3  | 1.3   | 4.8      | 16.5                                                                | 20.6  | 4.1   | 24.8     |
| Benin                    | 177.7                                                               | 180.9 | 3.2   | 1.8      | 143.4                                                               | 140.6 | -2.8  | -2.0     | 115.4                                                               | 101.7 | -13.7 | -11.9    |
| Bhutan                   | 138.5                                                               | 147.5 | 9     | 6.5      | 89                                                                  | 90.9  | 1.9   | 2.1      | 56.1                                                                | 60.8  | 4.7   | 8.4      |
| Bolivia                  | 120.8                                                               | 111   | -9.8  | -8.1     | 82.2                                                                | 75.6  | -6.6  | -8.0     | 54.2                                                                | 55.6  | 1.4   | 2.6      |
| Bosnia and Herzegovina   | 18.8                                                                | 18.8  | 0     | 0.0      | 9.6                                                                 | 10.7  | 1.1   | 11.5     | 8.4                                                                 | 6.6   | -1.8  | -21.4    |
| Botswana                 | 58.7                                                                | 55.2  | -3.5  | -6.0     | 95.9                                                                | 65.1  | -30.8 | -32.1    | 47.7                                                                | 48.6  | 0.9   | 1.9      |
| Brazil                   | 59.3                                                                | 53    | -6.3  | -10.6    | 35.7                                                                | 31.5  | -4.2  | -11.8    | 19.4                                                                | 21.8  | 2.4   | 12.4     |
| Brunei Darussalam        | 12.2                                                                | 11.3  | -0.9  | -7.4     | 9.3                                                                 | 9.4   | 0.1   | 1.1      | 7.3                                                                 | 7.2   | -0.1  | -1.4     |
| Bulgaria                 | 22.2                                                                | 18.6  | -3.6  | -16.2    | 20.7                                                                | 17.3  | -3.4  | -16.4    | 12.7                                                                | 10.2  | -2.5  | -19.7    |
| Burkina Faso             | 204.5                                                               | 212   | 7.5   | 3.7      | 190.8                                                               | 182.9 | -7.9  | -4.1     | 176.2                                                               | 160.1 | -16.1 | -9.1     |
| Burundi                  | 183.2                                                               | 189   | 5.8   | 3.2      | 163.8                                                               | 163.3 | -0.5  | -0.3     | 141.9                                                               | 120.6 | -21.3 | -15.0    |
| Cambodia                 | 121                                                                 | 114.1 | -6.9  | -5.7     | 103.1                                                               | 102.3 | -0.8  | -0.8     | 51                                                                  | 53.9  | 2.9   | 5.7      |
| Cameroon                 | 136.6                                                               | 147.2 | 10.6  | 7.8      | 147.5                                                               | 144   | -3.5  | -2.4     | 136.2                                                               | 113.9 | -22.3 | -16.4    |
| Canada                   | 8.3                                                                 | 8.4   | 0.1   | 1.2      | 6.2                                                                 | 6.1   | -0.1  | -1.6     | 5.9                                                                 | 4.9   | -1    | -16.9    |
| Cape Verde               | 59.2                                                                | 60.5  | 1.3   | 2.2      | 46                                                                  | 47.9  | 1.9   | 4.1      | 35.6                                                                | 33.3  | -2.3  | -6.5     |
| Central African Republic | 165.2                                                               | 171.2 | 6     | 3.6      | 175.9                                                               | 176.5 | 0.6   | 0.3      | 158.8                                                               | 158.3 | -0.5  | -0.3     |
| Chad                     | 207.3                                                               | 213.9 | 6.6   | 3.2      | 189.5                                                               | 192.1 | 2.6   | 1.4      | 173.4                                                               | 170.4 | -3    | -1.7     |
| Chile                    | 18.7                                                                | 18.1  | -0.6  | -3.2     | 10.8                                                                | 10.9  | 0.1   | 0.9      | 8.8                                                                 | 6.8   | -2    | -22.7    |
| China                    | 48.3                                                                | 40.8  | -7.5  | -15.5    | 33                                                                  | 31.1  | -1.9  | -5.8     | 18.4                                                                | 14.6  | -3.8  | -20.7    |
| Colombia                 | 36.6                                                                | 33.7  | -2.9  | -7.9     | 26.8                                                                | 26.8  | 0     | 0.0      | 19.1                                                                | 22.6  | 3.5   | 18.3     |

|                            |       |       |       |       |       |       |       |       |       |       |       |       |
|----------------------------|-------|-------|-------|-------|-------|-------|-------|-------|-------|-------|-------|-------|
| Comoros                    | 125.2 | 117.8 | -7.4  | -5.9  | 104.3 | 85.4  | -18.9 | -18.1 | 85.6  | 64.6  | -21   | -24.5 |
| Congo                      | 116.3 | 105.7 | -10.6 | -9.1  | 104.2 | 116.4 | 12.2  | 11.7  | 93.4  | 102.7 | 9.3   | 10.0  |
| Congo, Republic of the     | 181.4 | 182.6 | 1.2   | 0.7   | 181.4 | 167.6 | -13.8 | -7.6  | 169.9 | 132   | -37.9 | -22.3 |
| Costa Rica                 | 17.2  | 20.9  | 3.7   | 21.5  | 12.9  | 14.1  | 1.2   | 9.3   | 10.1  | 8.4   | -1.7  | -16.8 |
| Côte d'Ivoire              | 151.4 | 152.9 | 1.5   | 1.0   | 147.7 | 141.3 | -6.4  | -4.3  | 123   | 108.9 | -14.1 | -11.5 |
| Croatia                    | 12.9  | 12.8  | -0.1  | -0.8  | 8.4   | 8.6   | 0.2   | 2.4   | 5.5   | 5.8   | 0.3   | 5.5   |
| Cuba                       | 13.4  | 13.6  | 0.2   | 1.5   | 8.5   | 8.5   | 0     | 0.0   | 5.9   | 5.3   | -0.6  | -10.2 |
| Cyprus                     | 11    | 12.1  | 1.1   | 10.0  | 6.5   | 6.3   | -0.2  | -3.1  | 3.8   | 3.6   | -0.2  | -5.3  |
| Czech Republic             | 14.3  | 12.3  | -2    | -14.0 | 6.7   | 5.4   | -1.3  | -19.4 | 4     | 3.6   | -0.4  | -10.0 |
| Denmark                    | 8.7   | 9.3   | 0.6   | 6.9   | 5.6   | 5.6   | 0     | 0.0   | 3.9   | 4.4   | 0.5   | 12.8  |
| Djibouti                   | 122.7 | 113.7 | -9    | -7.3  | 105.6 | 91.7  | -13.9 | -13.2 | 91.1  | 69.3  | -21.8 | -23.9 |
| Dominica                   | 17.4  | 21.9  | 4.5   | 25.9  | 14.9  | 22.7  | 7.8   | 52.3  | 12.4  | 19.3  | 6.9   | 55.6  |
| Dominican Republic         | 62.2  | 57.8  | -4.4  | -7.1  | 40.6  | 38.2  | -2.4  | -5.9  | 26.5  | 28.9  | 2.4   | 9.1   |
| Ecuador                    | 52.3  | 50.1  | -2.2  | -4.2  | 32.7  | 36.1  | 3.4   | 10.4  | 20.1  | 20.5  | 0.4   | 2.0   |
| Egypt                      | 93.5  | 83.5  | -10   | -10.7 | 46.5  | 45.3  | -1.2  | -2.6  | 21.8  | 24.1  | 2.3   | 10.6  |
| El Salvador                | 61.9  | 58    | -3.9  | -6.3  | 34    | 34.3  | 0.3   | 0.9   | 16.2  | 17.2  | 1     | 6.2   |
| Equatorial Guinea          | 189.5 | 183.8 | -5.7  | -3.0  | 152.3 | 189.7 | 37.4  | 24.6  | 120.8 | 191.5 | 70.7  | 58.5  |
| Eritrea                    | 140.6 | 146.6 | 6     | 4.3   | 92.7  | 94.7  | 2     | 2.2   | 60.8  | 72.2  | 11.4  | 18.8  |
| Estonia                    | 21.1  | 21    | -0.1  | -0.5  | 13    | 12.5  | -0.5  | -3.8  | 5.4   | 6.8   | 1.4   | 25.9  |
| Ethiopia                   | 184.1 | 203.8 | 19.7  | 10.7  | 140.7 | 135   | -5.7  | -4.1  | 105.9 | 99.2  | -6.7  | -6.3  |
| Fiji                       | 29.5  | 33.3  | 3.8   | 12.9  | 22.6  | 32.3  | 9.7   | 42.9  | 17.4  | 28    | 10.6  | 60.9  |
| Finland                    | 6.7   | 6.9   | 0.2   | 3.0   | 4.3   | 4.2   | -0.1  | -2.3  | 3     | 3     | 0     | 0.0   |
| France                     | 8.8   | 9     | 0.2   | 2.3   | 5.4   | 5.5   | 0.1   | 1.9   | 4.1   | 4     | -0.1  | -2.4  |
| Gabon                      | 92.6  | 93.3  | 0.7   | 0.8   | 87.5  | 84.6  | -2.9  | -3.3  | 73.5  | 68.5  | -5    | -6.8  |
| Gambia                     | 165.2 | 158.9 | -6.3  | -3.8  | 127.5 | 134.2 | 6.7   | 5.3   | 98.1  | 97.7  | -0.4  | -0.4  |
| Georgia                    | 46.8  | 43.6  | -3.2  | -6.8  | 33.4  | 38.5  | 5.1   | 15.3  | 22.4  | 27.7  | 5.3   | 23.7  |
| Germany                    | 8.5   | 9.3   | 0.8   | 9.4   | 5.4   | 5.4   | 0     | 0.0   | 4.1   | 4     | -0.1  | -2.4  |
| Ghana                      | 121.7 | 121.8 | 0.1   | 0.1   | 99.1  | 102.2 | 3.1   | 3.1   | 74.4  | 63.8  | -10.6 | -14.2 |
| Greece                     | 12.7  | 10.5  | -2.2  | -17.3 | 7.7   | 6.2   | -1.5  | -19.5 | 4.1   | 3.6   | -0.5  | -12.2 |
| Grenada                    | 21.2  | 26.6  | 5.4   | 25.5  | 15.1  | 21.2  | 6.1   | 40.4  | 11.1  | 14.3  | 3.2   | 28.8  |
| Guatemala                  | 77.9  | 77    | -0.9  | -1.2  | 48.5  | 51.4  | 2.9   | 6.0   | 31.8  | 34.3  | 2.5   | 7.9   |
| Guinea                     | 229.2 | 228.5 | -0.7  | -0.3  | 175   | 177.2 | 2.2   | 1.3   | 129.9 | 134.5 | 4.6   | 3.5   |
| Guinea-Bissau              | 209.9 | 235.1 | 25.2  | 12.0  | 176.8 | 203   | 26.2  | 14.8  | 149.5 | 172.4 | 22.9  | 15.3  |
| Guyana                     | 65.8  | 59.5  | -6.3  | -9.6  | 46.8  | 46.3  | -0.5  | -1.1  | 30.4  | 39.8  | 9.4   | 30.9  |
| Haiti                      | 150.5 | 148.3 | -2.2  | -1.5  | 109   | 99.5  | -9.5  | -8.7  | 164.8 | 109.2 | -55.6 | -33.7 |
| Honduras                   | 58.1  | 56.4  | -1.7  | -2.9  | 37.4  | 37.6  | 0.2   | 0.5   | 24    | 22.9  | -1.1  | -4.6  |
| Hungary                    | 18.7  | 16.2  | -2.5  | -13.4 | 11    | 9.8   | -1.2  | -10.9 | 6.4   | 5.8   | -0.6  | -9.4  |
| Iceland                    | 6.3   | 6.8   | 0.5   | 7.9   | 3.9   | 3.9   | 0     | 0.0   | 2.4   | 2.7   | 0.3   | 12.5  |
| India                      | 114.8 | 114.2 | -0.6  | -0.5  | 85.5  | 84.9  | -0.6  | -0.7  | 62.7  | 62.6  | -0.1  | -0.2  |
| Indonesia                  | 85    | 75.4  | -9.6  | -11.3 | 54    | 51.1  | -2.9  | -5.4  | 35.3  | 38.8  | 3.5   | 9.9   |
| Iran (Islamic Republic of) | 64.8  | 70.6  | 5.8   | 9.0   | 43.9  | 45.4  | 1.5   | 3.4   | 25.8  | 25.5  | -0.3  | -1.2  |
| Iraq                       | 46.1  | 57.1  | 11    | 23.9  | 42.8  | 42    | -0.8  | -1.9  | 38.6  | 35.8  | -2.8  | -7.3  |
| Ireland                    | 9     | 9.6   | 0.6   | 6.7   | 7     | 7     | 0     | 0.0   | 3.9   | 4.2   | 0.3   | 7.7   |

|                                  |       |       |       |       |       |       |       |       |       |       |       |       |
|----------------------------------|-------|-------|-------|-------|-------|-------|-------|-------|-------|-------|-------|-------|
| Israel                           | 11.5  | 12.1  | 0.6   | 5.2   | 6.9   | 7.3   | 0.4   | 5.8   | 4.5   | 4.7   | 0.2   | 4.4   |
| Italy                            | 9.6   | 9.5   | -0.1  | -1.0  | 5.6   | 5.5   | -0.1  | -1.8  | 3.7   | 3.6   | -0.1  | -2.7  |
| Jamaica                          | 38    | 34.7  | -3.3  | -8.7  | 30.3  | 26.1  | -4.2  | -13.9 | 23.8  | 18.2  | -5.6  | -23.5 |
| Japan                            | 6.4   | 6     | -0.4  | -6.3  | 4.5   | 4.5   | 0     | 0.0   | 3.2   | 3     | -0.2  | -6.3  |
| Jordan                           | 38.3  | 35.1  | -3.2  | -8.4  | 29.4  | 27    | -2.4  | -8.2  | 21.7  | 23.8  | 2.1   | 9.7   |
| Kazakhstan                       | 57.4  | 50.6  | -6.8  | -11.8 | 43.9  | 45.6  | 1.7   | 3.9   | 33.2  | 30.4  | -2.8  | -8.4  |
| Kenya                            | 99.4  | 100.7 | 1.3   | 1.3   | 111.1 | 95    | -16.1 | -14.5 | 84.7  | 70.7  | -14   | -16.5 |
| Kiribati                         | 87.4  | 80.8  | -6.6  | -7.6  | 65.2  | 59.2  | -6    | -9.2  | 48.6  | 46.5  | -2.1  | -4.3  |
| Korea, North                     | 45    | 38.2  | -6.8  | -15.1 | 57.7  | 31.9  | -25.8 | -44.7 | 33.2  | 23.7  | -9.5  | -28.6 |
| Korea, South                     | 7.5   | 10.8  | 3.3   | 44.0  | 5.8   | 7.1   | 1.3   | 22.4  | 4.9   | 3.6   | -1.3  | -26.5 |
| Kuwait                           | 15.4  | 21.3  | 5.9   | 38.3  | 12.6  | 17    | 4.4   | 34.9  | 11.1  | 14.2  | 3.1   | 27.9  |
| Kyrgyzstan                       | 71.8  | 69.1  | -2.7  | -3.8  | 51.9  | 51.4  | -0.5  | -1.0  | 37.7  | 45.7  | 8     | 21.2  |
| Lao People's Democratic Republic | 144.8 | 141.8 | -3    | -2.1  | 88.1  | 99.3  | 11.2  | 12.7  | 53.8  | 71.4  | 17.6  | 32.7  |
| Latvia                           | 20.6  | 18    | -2.6  | -12.6 | 17.3  | 14.1  | -3.2  | -18.5 | 9.6   | 8.9   | -0.7  | -7.3  |
| Lebanon                          | 38.3  | 30.4  | -7.9  | -20.6 | 29.3  | 17.9  | -11.4 | -38.9 | 22.1  | 11.2  | -10.9 | -49.3 |
| Lesotho                          | 89.3  | 90.1  | 0.8   | 0.9   | 126.8 | 98.7  | -28.1 | -22.2 | 85    | 104.4 | 19.4  | 22.8  |
| Liberia                          | 226.6 | 252.6 | 26    | 11.5  | 168.9 | 166.7 | -2.2  | -1.3  | 102.6 | 104.8 | 2.2   | 2.1   |
| Libyan Arab Jamahiriya           | 44.5  | 39.9  | -4.6  | -10.3 | 27.2  | 23.8  | -3.4  | -12.5 | 16.9  | 14.2  | -2.7  | -16.0 |
| Lithuania                        | 17.4  | 15.4  | -2    | -11.5 | 11.8  | 10.7  | -1.1  | -9.3  | 6.5   | 6.3   | -0.2  | -3.1  |
| Luxembourg                       | 8.4   | 9.3   | 0.9   | 10.7  | 5     | 5.2   | 0.2   | 4.0   | 3.1   | 2.8   | -0.3  | -9.7  |
| Macedonia                        | 39.1  | 26.6  | -12.5 | -32.0 | 16    | 18.5  | 2.5   | 15.6  | 11.7  | 11.2  | -0.5  | -4.3  |
| Madagascar                       | 158.8 | 153.6 | -5.2  | -3.3  | 101.5 | 99.6  | -1.9  | -1.9  | 62.1  | 61    | -1.1  | -1.8  |
| Malawi                           | 222.1 | 209.8 | -12.3 | -5.5  | 166.5 | 149.5 | -17   | -10.2 | 92.1  | 101.8 | 9.7   | 10.5  |
| Malaysia                         | 17.9  | 17.2  | -0.7  | -3.9  | 10.6  | 9.1   | -1.5  | -14.2 | 6.3   | 5     | -1.3  | -20.6 |
| Maldives                         | 101.6 | 74.4  | -27.2 | -26.8 | 46.6  | 39.1  | -7.5  | -16.1 | 15    | 15.4  | 0.4   | 2.7   |
| Mali                             | 255.4 | 250.6 | -4.8  | -1.9  | 213.2 | 216.9 | 3.7   | 1.7   | 178.1 | 159.9 | -18.2 | -10.2 |
| Malta                            | 11.3  | 10.3  | -1    | -8.8  | 7.7   | 7.3   | -0.4  | -5.2  | 6     | 6.8   | 0.8   | 13.3  |
| Marshall Islands                 | 51.1  | 43.2  | -7.9  | -15.5 | 36.8  | 40.8  | 4     | 10.9  | 26.3  | 41.8  | 15.5  | 58.9  |
| Mauritania                       | 124.1 | 106.4 | -17.7 | -14.3 | 115.6 | 102.3 | -13.3 | -11.5 | 111.2 | 80.6  | -30.6 | -27.5 |
| Mauritius                        | 23.9  | 21.3  | -2.6  | -10.9 | 18.6  | 17.2  | -1.4  | -7.5  | 15.1  | 13.6  | -1.5  | -9.9  |
| Mexico                           | 48.6  | 39.8  | -8.8  | -18.1 | 29.1  | 25.2  | -3.9  | -13.4 | 16.7  | 18.7  | 2     | 12.0  |
| Micronesia (Fed. States of)      | 56.4  | 51.8  | -4.6  | -8.2  | 48.7  | 23.6  | -25.1 | -51.5 | 42.1  | 11.9  | -30.2 | -71.7 |
| Moldova                          | 37.1  | 30.8  | -6.3  | -17.0 | 26.4  | 23.2  | -3.2  | -12.1 | 19    | 12.8  | -6.2  | -32.6 |
| Mongolia                         | 106.9 | 94.4  | -12.5 | -11.7 | 60.9  | 56.4  | -4.5  | -7.4  | 31.6  | 33.5  | 1.9   | 6.0   |
| Montenegro                       | 17.6  | 26    | 8.4   | 47.7  | 12.6  | 13.9  | 1.3   | 10.3  | 8     | 7.6   | -0.4  | -5.0  |
| Morocco                          | 85.9  | 77    | -8.9  | -10.4 | 55.3  | 50.4  | -4.9  | -8.9  | 35.5  | 34.6  | -0.9  | -2.5  |
| Mozambique                       | 218.7 | 226.2 | 7.5   | 3.4   | 176.7 | 172.2 | -4.5  | -2.5  | 135   | 138.7 | 3.7   | 2.7   |
| Myanmar                          | 111.7 | 107.2 | -4.5  | -4.0  | 86.7  | 75.6  | -11.1 | -12.8 | 66.2  | 57    | -9.2  | -13.9 |
| Namibia                          | 73.1  | 72.5  | -0.6  | -0.8  | 73.9  | 63    | -10.9 | -14.7 | 40.1  | 59.2  | 19.1  | 47.6  |
| Nepal                            | 140.9 | 138.6 | -2.3  | -1.6  | 84.4  | 79.5  | -4.9  | -5.8  | 49.5  | 52.1  | 2.6   | 5.3   |
| Netherlands                      | 8.3   | 8.8   | 0.5   | 6.0   | 6.2   | 6.5   | 0.3   | 4.8   | 4.3   | 4.4   | 0.1   | 2.3   |
| New Zealand                      | 11.1  | 11.3  | 0.2   | 1.8   | 7.4   | 7.6   | 0.2   | 2.7   | 6     | 6.1   | 0.1   | 1.7   |
| Nicaragua                        | 68    | 66.6  | -1.4  | -2.1  | 42.7  | 40.4  | -2.3  | -5.4  | 26.9  | 30.3  | 3.4   | 12.6  |

|                                  |       |       |       |       |       |       |       |       |       |       |       |       |
|----------------------------------|-------|-------|-------|-------|-------|-------|-------|-------|-------|-------|-------|-------|
| Niger                            | 311   | 300.2 | -10.8 | -3.5  | 217.8 | 227.5 | 9.7   | 4.5   | 143.3 | 164   | 20.7  | 14.4  |
| Nigeria                          | 212.6 | 216.4 | 3.8   | 1.8   | 186   | 186.8 | 0.8   | 0.4   | 142.9 | 143.3 | 0.4   | 0.3   |
| Norway                           | 8.5   | 8.9   | 0.4   | 4.7   | 4.9   | 4.9   | 0     | 0.0   | 3.4   | 3.5   | 0.1   | 2.9   |
| Occupied Palestinian Territory   | 44.7  | 42.8  | -1.9  | -4.3  | 30.6  | 34.5  | 3.9   | 12.7  | 22.3  | 23.1  | 0.8   | 3.6   |
| Oman                             | 47.2  | 38.7  | -8.5  | -18.0 | 21.5  | 10.6  | -10.9 | -50.7 | 9.3   | 10.9  | 1.6   | 17.2  |
| Pakistan                         | 123.6 | 113   | -10.6 | -8.6  | 100.5 | 94.6  | -5.9  | -5.9  | 86.5  | 84.7  | -1.8  | -2.1  |
| Panama                           | 33.2  | 27.4  | -5.8  | -17.5 | 25.7  | 23.2  | -2.5  | -9.7  | 20.2  | 16.7  | -3.5  | -17.3 |
| Papua New Guinea                 | 89.5  | 88.7  | -0.8  | -0.9  | 73.9  | 74.9  | 1     | 1.4   | 60.8  | 66.8  | 6     | 9.9   |
| Paraguay                         | 50.1  | 37.7  | -12.4 | -24.8 | 35.3  | 28    | -7.3  | -20.7 | 24.6  | 22.5  | -2.1  | -8.5  |
| Peru                             | 77.6  | 71.8  | -5.8  | -7.5  | 40.6  | 40    | -0.6  | -1.5  | 19.2  | 25.3  | 6.1   | 31.8  |
| Philippines                      | 59.4  | 54.1  | -5.3  | -8.9  | 40.4  | 38.8  | -1.6  | -4.0  | 29.4  | 27.6  | -1.8  | -6.1  |
| Poland                           | 17.3  | 17.7  | 0.4   | 2.3   | 9.6   | 9.4   | -0.2  | -2.1  | 6     | 6.6   | 0.6   | 10.0  |
| Portugal                         | 14.6  | 14.1  | -0.5  | -3.4  | 7.2   | 7.3   | 0.1   | 1.4   | 3.7   | 4     | 0.3   | 8.1   |
| Qatar                            | 20.8  | 19.4  | -1.4  | -6.7  | 12.7  | 16.6  | 3.9   | 30.7  | 8.2   | 11.9  | 3.7   | 45.1  |
| Romania                          | 37.4  | 31    | -6.4  | -17.1 | 26.8  | 22.4  | -4.4  | -16.4 | 13.6  | 13.2  | -0.4  | -2.9  |
| Russian Federation               | 26.5  | 27    | 0.5   | 1.9   | 22.7  | 22    | -0.7  | -3.1  | 11.6  | 14    | 2.4   | 20.7  |
| Rwanda                           | 162.8 | 159.3 | -3.5  | -2.1  | 176.7 | 163.2 | -13.5 | -7.6  | 91.1  | 77.4  | -13.7 | -15.0 |
| Saint Lucia                      | 22.5  | 20.4  | -2.1  | -9.3  | 18.1  | 16    | -2.1  | -11.6 | 15.9  | 13.9  | -2    | -12.6 |
| Saint Vincent and the Grenadines | 26.5  | 24.5  | -2    | -7.5  | 21.9  | 23.4  | 1.5   | 6.8   | 21.2  | 22.1  | 0.9   | 4.2   |
| Samoa                            | 27.1  | 27.8  | 0.7   | 2.6   | 23.1  | 24.8  | 1.7   | 7.4   | 20.2  | 17.4  | -2.8  | -13.9 |
| Sao Tome and Principe            | 93.8  | 106.4 | 12.6  | 13.4  | 87    | 80.5  | -6.5  | -7.5  | 79.9  | 54.3  | -25.6 | -32.0 |
| Saudi Arabia                     | 44.6  | 22.3  | -22.3 | -50.0 | 25.8  | 18.7  | -7.1  | -27.5 | 17.5  | 16.8  | -0.7  | -4.0  |
| Senegal                          | 138.6 | 141.4 | 2.8   | 2.0   | 118.8 | 123.4 | 4.6   | 3.9   | 75.2  | 79.8  | 4.6   | 6.1   |
| Serbia                           | 28.6  | 12.7  | -15.9 | -55.6 | 12.7  | 7.9   | -4.8  | -37.8 | 7.1   | 4.3   | -2.8  | -39.4 |
| Seychelles                       | 16.6  | 17.1  | 0.5   | 3.0   | 13.8  | 14.5  | 0.7   | 5.1   | 13.5  | 13.7  | 0.2   | 1.5   |
| Sierra Leone                     | 276   | 252.5 | -23.5 | -8.5  | 232.8 | 216.1 | -16.7 | -7.2  | 174   | 128.9 | -45.1 | -25.9 |
| Singapore                        | 7.5   | 7.8   | 0.3   | 4.0   | 3.9   | 3.6   | -0.3  | -7.7  | 2.6   | 3     | 0.4   | 15.4  |
| Slovakia                         | 17.6  | 14.1  | -3.5  | -19.9 | 11.6  | 9.5   | -2.1  | -18.1 | 8.2   | 7.4   | -0.8  | -9.8  |
| Slovenia                         | 10.4  | 10.3  | -0.1  | -1.0  | 5.4   | 5.5   | 0.1   | 1.9   | 2.9   | 3.1   | 0.2   | 6.9   |
| Solomon Islands                  | 44.9  | 38.1  | -6.8  | -15.1 | 34.5  | 35.2  | 0.7   | 2.0   | 26.7  | 28    | 1.3   | 4.9   |
| Somalia                          | 180   | 186.2 | 6.2   | 3.4   | 180   | 144.8 | -35.2 | -19.6 | 180   | 101.9 | -78.1 | -43.4 |
| South Africa                     | 59.8  | 60.3  | 0.5   | 0.8   | 77.9  | 36.1  | -41.8 | -53.7 | 56.6  | 52.3  | -4.3  | -7.6  |
| Spain                            | 10.9  | 9.4   | -1.5  | -13.8 | 6.6   | 5.4   | -1.2  | -18.2 | 4.8   | 3.9   | -0.9  | -18.8 |
| Sri Lanka                        | 31.5  | 29.4  | -2.1  | -6.7  | 22.7  | 17    | -5.7  | -25.1 | 16.5  | 10.9  | -5.6  | -33.9 |
| Sudan                            | 124.9 | 113.4 | -11.5 | -9.2  | 113.5 | 100.3 | -13.2 | -11.6 | 103.3 | 83.1  | -20.2 | -19.6 |
| Suriname                         | 51.8  | 51.4  | -0.4  | -0.8  | 39.8  | 42.1  | 2.3   | 5.8   | 30.5  | 38.8  | 8.3   | 27.2  |
| Swaziland                        | 96.1  | 72.4  | -23.7 | -24.7 | 114   | 98.5  | -15.5 | -13.6 | 77.7  | 101.3 | 23.6  | 30.4  |
| Sweden                           | 6.7   | 7.3   | 0.6   | 9.0   | 4.1   | 4     | -0.1  | -2.4  | 3     | 2.9   | -0.1  | -3.3  |
| Switzerland                      | 8.1   | 8.6   | 0.5   | 6.2   | 5.7   | 5.8   | 0.1   | 1.8   | 4.6   | 4.3   | -0.3  | -6.5  |
| Syrian Arab Republic             | 38.2  | 34.7  | -3.5  | -9.2  | 23    | 19.4  | -3.6  | -15.7 | 16    | 11.1  | -4.9  | -30.6 |
| Tajikistan                       | 116.4 | 104.8 | -11.6 | -10.0 | 93.4  | 76.2  | -17.2 | -18.4 | 62.6  | 45.6  | -17   | -27.2 |
| Tanzania                         | 154.8 | 153.3 | -1.5  | -1.0  | 130.2 | 125.3 | -4.9  | -3.8  | 75.8  | 83.5  | 7.7   | 10.2  |
| Thailand                         | 31.8  | 22.6  | -9.2  | -28.9 | 17.7  | 14.2  | -3.5  | -19.8 | 13    | 10.4  | -2.6  | -20.0 |

|                                    |       |       |       |       |       |       |       |       |       |       |       |       |
|------------------------------------|-------|-------|-------|-------|-------|-------|-------|-------|-------|-------|-------|-------|
| Timor-Leste                        | 168.7 | 115.7 | -53   | -31.4 | 103.5 | 99.5  | -4    | -3.9  | 54.8  | 54.6  | -0.2  | -0.4  |
| Togo                               | 147.1 | 148.4 | 1.3   | 0.9   | 123.7 | 123.3 | -0.4  | -0.3  | 103.4 | 110.2 | 6.8   | 6.6   |
| Tonga                              | 24.5  | 27.2  | 2.7   | 11.0  | 19.7  | 26.4  | 6.7   | 34.0  | 15.6  | 23.3  | 7.7   | 49.4  |
| Trinidad and Tobago                | 36.6  | 30.2  | -6.4  | -17.5 | 31.6  | 32.2  | 0.6   | 1.9   | 27.1  | 25.2  | -1.9  | -7.0  |
| Tunisia                            | 49.3  | 48.6  | -0.7  | -1.4  | 28.4  | 27.2  | -1.2  | -4.2  | 16.1  | 14.4  | -1.7  | -10.6 |
| Turkey                             | 79.8  | 71.1  | -8.7  | -10.9 | 42.7  | 41    | -1.7  | -4.0  | 17.6  | 31.3  | 13.7  | 77.8  |
| Turkmenistan                       | 98.3  | 106.3 | 8     | 8.1   | 74    | 70.4  | -3.6  | -4.9  | 55.5  | 30.9  | -24.6 | -44.3 |
| Uganda                             | 174.9 | 165.3 | -9.6  | -5.5  | 144.3 | 136.1 | -8.2  | -5.7  | 98.9  | 93.3  | -5.6  | -5.7  |
| UK                                 | 9.3   | 9.6   | 0.3   | 3.2   | 6.6   | 6.3   | -0.3  | -4.5  | 5.4   | 5.5   | 0.1   | 1.9   |
| Ukraine                            | 20.7  | 19.9  | -0.8  | -3.9  | 17.6  | 19.3  | 1.7   | 9.7   | 13.2  | 12.7  | -0.5  | -3.8  |
| United Arab Emirates               | 21.5  | 15.1  | -6.4  | -29.8 | 12.4  | 8.2   | -4.2  | -33.9 | 7.1   | 3.6   | -3.5  | -49.3 |
| Uruguay                            | 23.1  | 23.1  | 0     | 0.0   | 17.1  | 16    | -1.1  | -6.4  | 10.8  | 11.7  | 0.9   | 8.3   |
| USA                                | 11.3  | 11.5  | 0.2   | 1.8   | 8.5   | 8.4   | -0.1  | -1.2  | 7.5   | 7.3   | -0.2  | -2.7  |
| Uzbekistan                         | 77.3  | 59.4  | -17.9 | -23.2 | 62.9  | 54.8  | -8.1  | -12.9 | 51.5  | 41.7  | -9.8  | -19.0 |
| Vanuatu                            | 38.6  | 32.2  | -6.4  | -16.6 | 23.2  | 34.1  | 10.9  | 47.0  | 13.9  | 34.4  | 20.5  | 147.5 |
| Venezuela (Bolivarian Republic of) | 33.3  | 29.2  | -4.1  | -12.3 | 24.8  | 23.1  | -1.7  | -6.9  | 18.3  | 15.4  | -2.9  | -15.8 |
| Viet Nam                           | 51.2  | 42.4  | -8.8  | -17.2 | 35    | 24.1  | -10.9 | -31.1 | 23.3  | 11    | -12.3 | -52.8 |
| Yemen                              | 128   | 122.9 | -5.1  | -4.0  | 99.5  | 95    | -4.5  | -4.5  | 77    | 58.4  | -18.6 | -24.2 |
| Zambia                             | 182.8 | 171.5 | -11.3 | -6.2  | 157.3 | 144.7 | -12.6 | -8.0  | 111   | 113   | 2     | 1.8   |
| Zimbabwe                           | 77.6  | 73.1  | -4.5  | -5.8  | 115   | 74.9  | -40.1 | -34.9 | 79.8  | 71.8  | -8    | -10   |

|                     | 1990<br>Number of under-five deaths<br>(thousands) |       |       |          | 2000<br>Number of under-five deaths<br>(thousands) |       |      |          | 2010<br>Number of under-five deaths<br>(thousands) |       |       |          |
|---------------------|----------------------------------------------------|-------|-------|----------|----------------------------------------------------|-------|------|----------|----------------------------------------------------|-------|-------|----------|
| Country             | IGME                                               | IHME  | Diff  | Diff (%) | IGME                                               | IHME  | Diff | Diff (%) | IGME                                               | IHME  | Diff  | Diff (%) |
| Afghanistan         | 128.5                                              | 112.9 | -15.6 | -12.1    | 161.0                                              | 178.0 | 17.0 | 10.6     | 191.0                                              | 154.7 | -36.3 | -19.0    |
| Albania             | 3.5                                                | 3.2   | -0.3  | -8.6     | 1.6                                                | 1.4   | -0.2 | -12.5    | 0.7                                                | 0.6   | -0.1  | -14.3    |
| Algeria             | 53.2                                               | 44.2  | -9.0  | -16.9    | 27.8                                               | 21.7  | -6.1 | -21.9    | 25.9                                               | 14.5  | -11.4 | -44.0    |
| Andorra             | 0.0                                                | 0.0   | 0.0   | -        | 0.0                                                | 0.0   | 0.0  | -        | 0.0                                                | 0.0   | 0.0   | -        |
| Angola              | 123.3                                              | 127.3 | 4.0   | 3.2      | 130.9                                              | 137.5 | 6.6  | 5.0      | 121.1                                              | 107.8 | -13.3 | -11.0    |
| Antigua and Barbuda | 0.0                                                | 0.0   | 0.0   | -        | 0.0                                                | 0.0   | 0.0  | -        | 0.0                                                | 0.0   | 0.0   | -        |
| Argentina           | 19.7                                               | 20.1  | 0.4   | 2.0      | 13.5                                               | 13.5  | 0.0  | 0.0      | 9.8                                                | 10.2  | 0.4   | 4.1      |
| Armenia             | 4.4                                                | 3.7   | -0.7  | -15.9    | 1.2                                                | 1.3   | 0.1  | 8.3      | 0.9                                                | 0.8   | -0.1  | -11.1    |
| Australia           | 2.3                                                | 2.4   | 0.1   | 4.3      | 1.5                                                | 1.6   | 0.1  | 6.7      | 1.5                                                | 1.4   | -0.1  | -6.7     |
| Austria             | 0.8                                                | 0.9   | 0.1   | 12.5     | 0.4                                                | 0.4   | 0.0  | 0.0      | 0.3                                                | 0.3   | 0.0   | 0.0      |
| Azerbaijan          | 19.1                                               | 15.0  | -4.1  | -21.5    | 8.7                                                | 8.2   | -0.5 | -5.7     | 8.6                                                | 7.3   | -1.3  | -15.1    |
| Bahamas             | 0.1                                                | 0.2   | 0.1   | 100.0    | 0.1                                                | 0.1   | 0.0  | 0.0      | 0.1                                                | 0.1   | 0.0   | 0.0      |
| Bahrain             | 0.2                                                | 0.3   | 0.1   | 50.0     | 0.1                                                | 0.2   | 0.1  | 100.0    | 0.2                                                | 0.2   | 0.0   | 0.0      |
| Bangladesh          | 527.5                                              | 514.1 | -13.4 | -2.5     | 299.9                                              | 304.3 | 4.4  | 1.5      | 139.7                                              | 172.6 | 32.9  | 23.6     |
| Barbados            | 0.1                                                | 0.1   | 0.0   | 0.0      | 0.1                                                | 0.1   | 0.0  | 0.0      | 0.1                                                | 0.0   | -0.1  | -100.0   |
| Belarus             | 2.7                                                | 3.2   | 0.5   | 18.5     | 1.3                                                | 1.6   | 0.3  | 23.1     | 0.6                                                | 1.0   | 0.4   | 66.7     |
| Belgium             | 1.1                                                | 1.2   | 0.1   | 9.1      | 0.6                                                | 0.7   | 0.1  | 16.7     | 0.5                                                | 0.5   | 0.0   | 0.0      |

|                          |        |       |        |       |       |       |       |       |       |       |       |        |
|--------------------------|--------|-------|--------|-------|-------|-------|-------|-------|-------|-------|-------|--------|
| Belize                   | 0.3    | 0.3   | 0.0    | 0.0   | 0.2   | 0.2   | 0.0   | 0.0   | 0.1   | 0.2   | 0.1   | 100.0  |
| Benin                    | 37.4   | 39.3  | 1.9    | 5.1   | 38.4  | 38.6  | 0.2   | 0.5   | 39.0  | 34.9  | -4.1  | -10.5  |
| Bhutan                   | 2.9    | 3.0   | 0.1    | 3.4   | 1.3   | 1.4   | 0.1   | 7.7   | 0.8   | 0.9   | 0.1   | 12.5   |
| Bolivia                  | 28.0   | 26.5  | -1.5   | -5.4  | 20.5  | 19.7  | -0.8  | -3.9  | 13.8  | 14.6  | 0.8   | 5.8    |
| Bosnia and Herzegovina   | 1.3    | 1.2   | -0.1   | -7.7  | 0.5   | 0.4   | -0.1  | -20.0 | 0.3   | 0.2   | -0.1  | -33.3  |
| Botswana                 | 2.7    | 2.6   | -0.1   | -3.7  | 4.5   | 3.1   | -1.4  | -31.1 | 2.3   | 2.3   | 0.0   | 0.0    |
| Brazil                   | 209.6  | 192.8 | -16.8  | -8.0  | 134.5 | 114.3 | -20.2 | -15.0 | 54.8  | 66.3  | 11.5  | 21.0   |
| Brunei Darussalam        | 0.1    | 0.1   | 0.0    | 0.0   | 0.1   | 0.1   | 0.0   | 0.0   | 0.1   | 0.1   | 0.0   | 0.0    |
| Bulgaria                 | 2.6    | 2.0   | -0.6   | -23.1 | 1.4   | 1.2   | -0.2  | -14.3 | 1.0   | 0.8   | -0.2  | -20.0  |
| Burkina Faso             | 84.8   | 90.8  | 6.0    | 7.1   | 100.8 | 99.0  | -1.8  | -1.8  | 120.4 | 110.9 | -9.5  | -7.9   |
| Burundi                  | 44.7   | 47.0  | 2.3    | 5.1   | 38.6  | 40.3  | 1.7   | 4.4   | 38.4  | 33.2  | -5.2  | -13.5  |
| Cambodia                 | 38.2   | 47.6  | 9.4    | 24.6  | 32.7  | 35.2  | 2.5   | 7.6   | 16.3  | 17.2  | 0.9   | 5.5    |
| Cameroon                 | 66.4   | 73.9  | 7.5    | 11.3  | 81.8  | 83.7  | 1.9   | 2.3   | 93.2  | 79.8  | -13.4 | -14.4  |
| Canada                   | 3.2    | 3.3   | 0.1    | 3.1   | 2.0   | 2.1   | 0.1   | 5.0   | 2.4   | 1.9   | -0.5  | -20.8  |
| Cape Verde               | 0.8    | 0.8   | 0.0    | 0.0   | 0.6   | 0.6   | 0.0   | 0.0   | 0.4   | 0.3   | -0.1  | -25.0  |
| Central African Republic | 19.2   | 20.4  | 1.2    | 6.3   | 24.8  | 25.2  | 0.4   | 1.6   | 23.4  | 24.1  | 0.7   | 3.0    |
| Chad                     | 54.6   | 58.9  | 4.3    | 7.9   | 67.6  | 73.1  | 5.5   | 8.1   | 80.1  | 84.0  | 3.9   | 4.9    |
| Chile                    | 5.6    | 5.5   | -0.1   | -1.8  | 2.7   | 2.8   | 0.1   | 3.7   | 2.2   | 1.7   | -0.5  | -22.7  |
| China                    | 1279.5 | 998.2 | -281.3 | -22.0 | 673.8 | 584.4 | -89.4 | -13.3 | 314.6 | 241.4 | -73.2 | -23.3  |
| Colombia                 | 32.7   | 30.3  | -2.4   | -7.3  | 24.1  | 24.4  | 0.3   | 1.2   | 17.6  | 20.7  | 3.1   | 17.6   |
| Comoros                  | 1.8    | 1.9   | 0.1    | 5.6   | 2.2   | 1.9   | -0.3  | -13.6 | 2.3   | 1.8   | -0.5  | -21.7  |
| Congo                    | 10.2   | 9.5   | -0.7   | -6.9  | 11.7  | 13.3  | 1.6   | 13.7  | 12.7  | 14.4  | 1.7   | 13.4   |
| Congo, Republic of the   | 311.7  | 325.4 | 13.7   | 4.4   | 415.1 | 402.8 | -12.3 | -3.0  | 464.6 | 372.9 | -91.7 | -19.7  |
| Costa Rica               | 1.5    | 1.7   | 0.2    | 13.3  | 1.0   | 1.1   | 0.1   | 10.0  | 0.7   | 0.6   | -0.1  | -14.3  |
| Côte d'Ivoire            | 75.9   | 77.8  | 1.9    | 2.5   | 87.5  | 85.3  | -2.2  | -2.5  | 80.5  | 72.7  | -7.8  | -9.7   |
| Croatia                  | 0.7    | 0.7   | 0.0    | 0.0   | 0.4   | 0.4   | 0.0   | 0.0   | 0.2   | 0.2   | 0.0   | 0.0    |
| Cuba                     | 2.5    | 2.4   | -0.1   | -4.0  | 1.3   | 1.2   | -0.1  | -7.7  | 0.6   | 0.6   | 0.0   | 0.0    |
| Cyprus                   | 0.2    | 0.1   | -0.1   | -50.0 | 0.1   | 0.1   | 0.0   | 0.0   | 0.1   | 0.0   | -0.1  | -100.0 |
| Czech Republic           | 2.1    | 1.6   | -0.5   | -23.8 | 0.5   | 0.5   | 0.0   | 0.0   | 0.5   | 0.4   | -0.1  | -20.0  |
| Denmark                  | 0.6    | 0.6   | 0.0    | 0.0   | 0.4   | 0.4   | 0.0   | 0.0   | 0.3   | 0.3   | 0.0   | 0.0    |
| Djibouti                 | 2.8    | 2.5   | -0.3   | -10.7 | 2.4   | 2.2   | -0.2  | -8.3  | 2.3   | 1.8   | -0.5  | -21.7  |
| Dominica                 | 0.0    | 0.0   | 0.0    | -     | 0.0   | 0.0   | 0.0   | -     | 0.0   | 0.0   | 0.0   | -      |
| Dominican Republic       | 13.0   | 12.4  | -0.6   | -4.6  | 8.4   | 8.2   | -0.2  | -2.4  | 5.7   | 6.3   | 0.6   | 10.5   |
| Ecuador                  | 15.4   | 14.9  | -0.5   | -3.2  | 10.1  | 11.0  | 0.9   | 8.9   | 6.0   | 6.2   | 0.2   | 3.3    |
| Egypt                    | 173.8  | 152.5 | -21.3  | -12.3 | 82.7  | 78.5  | -4.2  | -5.1  | 40.7  | 45.1  | 4.4   | 10.8   |
| El Salvador              | 10.4   | 9.8   | -0.6   | -5.8  | 5.2   | 5.1   | -0.1  | -1.9  | 2.2   | 2.2   | 0.0   | 0.0    |
| Equatorial Guinea        | 3.2    | 3.1   | -0.1   | -3.1  | 3.0   | 3.9   | 0.9   | 30.0  | 2.9   | 4.8   | 1.9   | 65.5   |
| Eritrea                  | 17.8   | 18.1  | 0.3    | 1.7   | 12.1  | 13.0  | 0.9   | 7.4   | 11.2  | 13.5  | 2.3   | 20.5   |
| Estonia                  | 0.5    | 0.5   | 0.0    | 0.0   | 0.2   | 0.2   | 0.0   | 0.0   | 0.1   | 0.1   | 0.0   | 0.0    |
| Ethiopia                 | 398.4  | 457.9 | 59.5   | 14.9  | 370.9 | 364.7 | -6.2  | -1.7  | 270.9 | 259.6 | -11.3 | -4.2   |
| Fiji                     | 0.6    | 0.7   | 0.1    | 16.7  | 0.4   | 0.7   | 0.3   | 75.0  | 0.3   | 0.5   | 0.2   | 66.7   |
| Finland                  | 0.4    | 0.4   | 0.0    | 0.0   | 0.2   | 0.2   | 0.0   | 0.0   | 0.2   | 0.2   | 0.0   | 0.0    |
| France                   | 6.4    | 6.7   | 0.3    | 4.7   | 4.1   | 4.1   | 0.0   | 0.0   | 3.3   | 3.2   | -0.1  | -3.0   |

|                                  |        |        |       |       |        |        |       |       |        |        |       |       |
|----------------------------------|--------|--------|-------|-------|--------|--------|-------|-------|--------|--------|-------|-------|
| Gabon                            | 3.1    | 3.2    | 0.1   | 3.2   | 3.2    | 3.3    | 0.1   | 3.1   | 2.9    | 2.8    | -0.1  | -3.4  |
| Gambia                           | 6.9    | 6.9    | 0.0   | 0.0   | 6.8    | 7.5    | 0.7   | 10.3  | 6.1    | 6.3    | 0.2   | 3.3   |
| Georgia                          | 4.4    | 4.0    | -0.4  | -9.1  | 1.7    | 2.3    | 0.6   | 35.3  | 1.2    | 1.4    | 0.2   | 16.7  |
| Germany                          | 7.3    | 7.8    | 0.5   | 6.8   | 4.7    | 4.1    | -0.6  | -12.8 | 2.9    | 2.8    | -0.1  | -3.4  |
| Ghana                            | 67.6   | 69.1   | 1.5   | 2.2   | 62.0   | 66.2   | 4.2   | 6.8   | 56.6   | 48.5   | -8.1  | -14.3 |
| Greece                           | 1.3    | 1.1    | -0.2  | -15.4 | 0.8    | 0.6    | -0.2  | -25.0 | 0.5    | 0.4    | -0.1  | -20.0 |
| Grenada                          | 0.1    | 0.1    | 0.0   | 0.0   | 0.0    | 0.0    | 0.0   | -     | 0.0    | 0.0    | 0.0   | -     |
| Guatemala                        | 25.7   | 26.4   | 0.7   | 2.7   | 19.2   | 20.9   | 1.7   | 8.9   | 14.3   | 15.8   | 1.5   | 10.5  |
| Guinea                           | 58.4   | 60.5   | 2.1   | 3.6   | 58.8   | 61.8   | 3.0   | 5.1   | 48.5   | 51.7   | 3.2   | 6.6   |
| Guinea-Bissau                    | 8.8    | 10.7   | 1.9   | 21.6  | 8.5    | 10.4   | 1.9   | 22.4  | 8.2    | 9.9    | 1.7   | 20.7  |
| Guyana                           | 1.3    | 1.1    | -0.2  | -15.4 | 0.7    | 0.7    | 0.0   | 0.0   | 0.3    | 0.5    | 0.2   | 66.7  |
| Haiti                            | 38.2   | 39.4   | 1.2   | 3.1   | 29.1   | 26.5   | -2.6  | -8.9  | 45.4   | 29.4   | -16.0 | -35.2 |
| Honduras                         | 10.6   | 10.5   | -0.1  | -0.9  | 7.2    | 7.4    | 0.2   | 2.8   | 4.8    | 4.6    | -0.2  | -4.2  |
| Hungary                          | 2.6    | 2.0    | -0.6  | -23.1 | 1.0    | 1.0    | 0.0   | 0.0   | 0.6    | 0.6    | 0.0   | 0.0   |
| Iceland                          | 0.0    | 0.0    | 0.0   | -     | 0.0    | 0.0    | 0.0   | -     | 0.0    | 0.0    | 0.0   | -     |
| India                            | 3078.3 | 3106.2 | 27.9  | 0.9   | 2294.0 | 2317.2 | 23.2  | 1.0   | 1696.3 | 1699.5 | 3.2   | 0.2   |
| Indonesia                        | 403.2  | 362.0  | -41.2 | -10.2 | 240.2  | 233.3  | -6.9  | -2.9  | 151.4  | 170.8  | 19.4  | 12.8  |
| Iran (Islamic Republic of)       | 121.9  | 131.0  | 9.1   | 7.5   | 56.3   | 57.0   | 0.7   | 1.2   | 34.2   | 32.3   | -1.9  | -5.6  |
| Iraq                             | 30.2   | 38.0   | 7.8   | 25.8  | 37.4   | 37.1   | -0.3  | -0.8  | 42.6   | 39.8   | -2.8  | -6.6  |
| Ireland                          | 0.5    | 0.5    | 0.0   | 0.0   | 0.4    | 0.4    | 0.0   | 0.0   | 0.3    | 0.3    | 0.0   | 0.0   |
| Israel                           | 1.2    | 1.2    | 0.0   | 0.0   | 0.9    | 0.9    | 0.0   | 0.0   | 0.7    | 0.7    | 0.0   | 0.0   |
| Italy                            | 5.4    | 5.3    | -0.1  | -1.9  | 2.9    | 2.9    | 0.0   | 0.0   | 2.2    | 2.0    | -0.2  | -9.1  |
| Jamaica                          | 2.2    | 2.1    | -0.1  | -4.5  | 1.7    | 1.5    | -0.2  | -11.8 | 1.3    | 0.9    | -0.4  | -30.8 |
| Japan                            | 7.9    | 7.9    | 0.0   | 0.0   | 5.3    | 5.3    | 0.0   | 0.0   | 3.5    | 3.3    | -0.2  | -5.7  |
| Jordan                           | 4.8    | 4.3    | -0.5  | -10.4 | 4.5    | 3.9    | -0.6  | -13.3 | 3.7    | 3.6    | -0.1  | -2.7  |
| Kazakhstan                       | 23.0   | 19.2   | -3.8  | -16.5 | 9.4    | 11.0   | 1.6   | 17.0  | 12.7   | 10.3   | -2.4  | -18.9 |
| Kenya                            | 97.0   | 98.5   | 1.5   | 1.5   | 127.3  | 110.8  | -16.5 | -13.0 | 122.3  | 106.0  | -16.3 | -13.3 |
| Kiribati                         | 0.2    | 0.2    | 0.0   | 0.0   | 0.1    | 0.1    | 0.0   | 0.0   | 0.1    | 0.1    | 0.0   | 0.0   |
| Korea, North                     | 16.5   | 15.8   | -0.7  | -4.2  | 23.6   | 13.4   | -10.2 | -43.2 | 11.7   | 8.3    | -3.4  | -29.1 |
| Korea, South                     | 4.3    | 7.3    | 3.0   | 69.8  | 3.1    | 4.0    | 0.9   | 29.0  | 2.7    | 1.7    | -1.0  | -37.0 |
| Kuwait                           | 0.7    | 0.9    | 0.2   | 28.6  | 0.5    | 0.7    | 0.2   | 40.0  | 0.6    | 0.7    | 0.1   | 16.7  |
| Kyrgyzstan                       | 9.9    | 9.5    | -0.4  | -4.0  | 5.7    | 5.6    | -0.1  | -1.8  | 5.3    | 5.8    | 0.5   | 9.4   |
| Lao People's Democratic Republic | 24.3   | 24.2   | -0.1  | -0.4  | 14.0   | 16.3   | 2.3   | 16.4  | 7.7    | 10.1   | 2.4   | 31.2  |
| Latvia                           | 0.9    | 0.7    | -0.2  | -22.2 | 0.3    | 0.3    | 0.0   | 0.0   | 0.2    | 0.2    | 0.0   | 0.0   |
| Lebanon                          | 2.8    | 2.4    | -0.4  | -14.3 | 2.4    | 1.4    | -1.0  | -41.7 | 1.5    | 0.7    | -0.8  | -53.3 |
| Lesotho                          | 5.1    | 5.3    | 0.2   | 3.9   | 8.0    | 6.2    | -1.8  | -22.5 | 5.0    | 6.3    | 1.3   | 26.0  |
| Liberia                          | 20.8   | 25.3   | 4.5   | 21.6  | 19.4   | 18.9   | -0.5  | -2.6  | 15.5   | 15.8   | 0.3   | 1.9   |
| Libyan Arab Jamahiriya           | 4.6    | 4.7    | 0.1   | 2.2   | 3.2    | 2.9    | -0.3  | -9.4  | 2.4    | 2.1    | -0.3  | -12.5 |
| Lithuania                        | 1.0    | 0.9    | -0.1  | -10.0 | 0.4    | 0.4    | 0.0   | 0.0   | 0.2    | 0.2    | 0.0   | 0.0   |
| Luxembourg                       | 0.0    | 0.0    | 0.0   | -     | 0.0    | 0.0    | 0.0   | -     | 0.0    | 0.0    | 0.0   | -     |
| Macedonia                        | 1.3    | 0.9    | -0.4  | -30.8 | 0.4    | 0.5    | 0.1   | 25.0  | 0.3    | 0.2    | -0.1  | -33.3 |
| Madagascar                       | 78.1   | 75.4   | -2.7  | -3.5  | 62.1   | 61.6   | -0.5  | -0.8  | 44.1   | 43.8   | -0.3  | -0.7  |
| Malawi                           | 92.1   | 88.3   | -3.8  | -4.1  | 77.0   | 72.6   | -4.4  | -5.7  | 55.9   | 65.0   | 9.1   | 16.3  |

|                                  |       |       |       |       |       |       |       |        |       |       |       |        |
|----------------------------------|-------|-------|-------|-------|-------|-------|-------|--------|-------|-------|-------|--------|
| Malaysia                         | 8.9   | 8.7   | -0.2  | -2.2  | 5.9   | 5.2   | -0.7  | -11.9  | 3.5   | 2.9   | -0.6  | -17.1  |
| Maldives                         | 0.9   | 0.7   | -0.2  | -22.2 | 0.3   | 0.2   | -0.1  | -33.3  | 0.1   | 0.1   | 0.0   | 0.0    |
| Mali                             | 102.2 | 104.2 | 2.0   | 2.0   | 110.4 | 116.5 | 6.1   | 5.5    | 120.5 | 111.3 | -9.2  | -7.6   |
| Malta                            | 0.1   | 0.1   | 0.0   | 0.0   | 0.0   | 0.0   | 0.0   | -      | 0.0   | 0.0   | 0.0   | -      |
| Marshall Islands                 | 0.1   | 0.1   | 0.0   | 0.0   | 0.1   | 0.1   | 0.0   | 0.0    | 0.0   | 0.1   | 0.1   | -      |
| Mauritania                       | 9.7   | 8.5   | -1.2  | -12.4 | 11.0  | 9.9   | -1.1  | -10.0  | 12.6  | 9.3   | -3.3  | -26.2  |
| Mauritius                        | 0.6   | 0.5   | -0.1  | -16.7 | 0.4   | 0.4   | 0.0   | 0.0    | 0.2   | 0.2   | 0.0   | 0.0    |
| Mexico                           | 115.3 | 94.6  | -20.7 | -18.0 | 62.6  | 57.6  | -5.0  | -8.0   | 36.6  | 41.7  | 5.1   | 13.9   |
| Micronesia (Fed. States of)      | 0.2   | 0.2   | 0.0   | 0.0   | 0.2   | 0.1   | -0.1  | -50.0  | 0.1   | 0.0   | -0.1  | -100.0 |
| Moldova                          | 3.2   | 2.5   | -0.7  | -21.9 | 1.4   | 1.1   | -0.3  | -21.4  | 0.9   | 0.6   | -0.3  | -33.3  |
| Mongolia                         | 8.0   | 6.7   | -1.3  | -16.3 | 3.2   | 2.8   | -0.4  | -12.5  | 2.2   | 2.1   | -0.1  | -4.5   |
| Montenegro                       | 0.2   | 0.2   | 0.0   | 0.0   | 0.1   | 0.1   | 0.0   | 0.0    | 0.1   | 0.1   | 0.0   | 0.0    |
| Morocco                          | 60.5  | 56.7  | -3.8  | -6.3  | 34.7  | 32.0  | -2.7  | -7.8   | 22.7  | 21.6  | -1.1  | -4.8   |
| Mozambique                       | 123.0 | 135.2 | 12.2  | 9.9   | 132.6 | 133.1 | 0.5   | 0.4    | 114.3 | 121.7 | 7.4   | 6.5    |
| Myanmar                          | 120.0 | 115.0 | -5.0  | -4.2  | 83.5  | 70.7  | -12.8 | -15.3  | 56.0  | 66.6  | 10.6  | 18.9   |
| Namibia                          | 3.7   | 3.8   | 0.1   | 2.7   | 4.2   | 3.7   | -0.5  | -11.9  | 2.4   | 3.5   | 1.1   | 45.8   |
| Nepal                            | 99.2  | 100.5 | 1.3   | 1.3   | 67.2  | 64.1  | -3.1  | -4.6   | 34.5  | 37.9  | 3.4   | 9.9    |
| Netherlands                      | 1.6   | 1.7   | 0.1   | 6.2   | 1.2   | 1.3   | 0.1   | 8.3    | 0.8   | 0.8   | 0.0   | 0.0    |
| New Zealand                      | 0.6   | 0.6   | 0.0   | 0.0   | 0.4   | 0.4   | 0.0   | 0.0    | 0.4   | 0.4   | 0.0   | 0.0    |
| Nicaragua                        | 9.8   | 10.1  | 0.3   | 3.1   | 5.9   | 5.8   | -0.1  | -1.7   | 3.9   | 4.2   | 0.3   | 7.7    |
| Niger                            | 123.8 | 125.7 | 1.9   | 1.5   | 113.8 | 125.3 | 11.5  | 10.1   | 100.0 | 119.1 | 19.1  | 19.1   |
| Nigeria                          | 871.6 | 906.4 | 34.8  | 4.0   | 916.4 | 942.4 | 26.0  | 2.8    | 860.6 | 885.3 | 24.7  | 2.9    |
| Norway                           | 0.5   | 0.5   | 0.0   | 0.0   | 0.3   | 0.3   | 0.0   | 0.0    | 0.2   | 0.2   | 0.0   | 0.0    |
| Occupied Palestinian Territory   | 3.8   | 3.9   | 0.1   | 2.6   | 3.5   | 4.1   | 0.6   | 17.1   | 3.0   | 3.1   | 0.1   | 3.3    |
| Oman                             | 3.4   | 2.8   | -0.6  | -17.6 | 1.2   | 0.6   | -0.6  | -50.0  | 0.5   | 0.5   | 0.0   | 0.0    |
| Pakistan                         | 551.1 | 503.7 | -47.4 | -8.6  | 466.4 | 429.7 | -36.7 | -7.9   | 423.1 | 398.9 | -24.2 | -5.7   |
| Panama                           | 2.1   | 1.7   | -0.4  | -19.0 | 1.8   | 1.6   | -0.2  | -11.1  | 1.4   | 1.2   | -0.2  | -14.3  |
| Papua New Guinea                 | 12.3  | 12.7  | 0.4   | 3.3   | 13.7  | 13.9  | 0.2   | 1.5    | 12.5  | 13.8  | 1.3   | 10.4   |
| Paraguay                         | 6.9   | 5.3   | -1.6  | -23.2 | 5.2   | 4.2   | -1.0  | -19.2  | 3.7   | 3.5   | -0.2  | -5.4   |
| Peru                             | 50.2  | 46.2  | -4.0  | -8.0  | 24.9  | 25.0  | 0.1   | 0.4    | 11.4  | 15.1  | 3.7   | 32.5   |
| Philippines                      | 119.9 | 108.1 | -11.8 | -9.8  | 91.4  | 88.1  | -3.3  | -3.6   | 66.1  | 64.5  | -1.6  | -2.4   |
| Poland                           | 9.0   | 10.0  | 1.0   | 11.1  | 3.6   | 3.6   | 0.0   | 0.0    | 2.5   | 2.6   | 0.1   | 4.0    |
| Portugal                         | 1.6   | 1.6   | 0.0   | 0.0   | 0.8   | 0.8   | 0.0   | 0.0    | 0.4   | 0.4   | 0.0   | 0.0    |
| Qatar                            | 0.2   | 0.2   | 0.0   | 0.0   | 0.1   | 0.2   | 0.1   | 100.0  | 0.2   | 0.2   | 0.0   | 0.0    |
| Romania                          | 15.3  | 10.2  | -5.1  | -33.3 | 7.4   | 5.1   | -2.3  | -31.1  | 3.1   | 2.9   | -0.2  | -6.5   |
| Russian Federation               | 60.0  | 56.1  | -3.9  | -6.5  | 32.8  | 29.3  | -3.5  | -10.7  | 19.6  | 23.3  | 3.7   | 18.9   |
| Rwanda                           | 52.5  | 48.5  | -4.0  | -7.6  | 59.0  | 47.7  | -11.3 | -19.2  | 37.6  | 32.8  | -4.8  | -12.8  |
| Saint Lucia                      | 0.1   | 0.1   | 0.0   | 0.0   | 0.1   | 0.0   | -0.1  | -100.0 | 0.1   | 0.0   | -0.1  | -100.0 |
| Saint Vincent and the Grenadines | 0.1   | 0.1   | 0.0   | 0.0   | 0.0   | 0.1   | 0.1   | -      | 0.0   | 0.0   | 0.0   | -      |
| Samoa                            | 0.1   | 0.1   | 0.0   | 0.0   | 0.1   | 0.1   | 0.0   | 0.0    | 0.1   | 0.1   | 0.0   | 0.0    |
| Sao Tome and Principe            | 0.4   | 0.5   | 0.1   | 25.0  | 0.4   | 0.4   | 0.0   | 0.0    | 0.4   | 0.3   | -0.1  | -25.0  |
| Saudi Arabia                     | 24.5  | 12.8  | -11.7 | -47.8 | 15.1  | 10.5  | -4.6  | -30.5  | 11.5  | 9.9   | -1.6  | -13.9  |
| Senegal                          | 41.7  | 43.9  | 2.2   | 5.3   | 43.1  | 46.2  | 3.1   | 7.2    | 34.0  | 36.5  | 2.5   | 7.4    |

|                                    |       |       |       |       |       |       |       |       |       |       |       |       |
|------------------------------------|-------|-------|-------|-------|-------|-------|-------|-------|-------|-------|-------|-------|
| Serbia                             | 4.1   | 1.8   | -2.3  | -56.1 | 1.5   | 1.0   | -0.5  | -33.3 | 0.8   | 0.5   | -0.3  | -37.5 |
| Seychelles                         | 0.0   | 0.0   | 0.0   | -     | 0.0   | 0.0   | 0.0   | -     | 0.0   | 0.0   | 0.0   | -     |
| Sierra Leone                       | 44.7  | 41.8  | -2.9  | -6.5  | 39.8  | 39.7  | -0.1  | -0.3  | 39.1  | 28.9  | -10.2 | -26.1 |
| Singapore                          | 0.3   | 0.4   | 0.1   | 33.3  | 0.2   | 0.2   | 0.0   | 0.0   | 0.1   | 0.1   | 0.0   | 0.0   |
| Slovakia                           | 1.5   | 1.2   | -0.3  | -20.0 | 0.6   | 0.5   | -0.1  | -16.7 | 0.5   | 0.4   | -0.1  | -20.0 |
| Slovenia                           | 0.2   | 0.2   | 0.0   | 0.0   | 0.1   | 0.1   | 0.0   | 0.0   | 0.1   | 0.1   | 0.0   | 0.0   |
| Solomon Islands                    | 0.5   | 0.5   | 0.0   | 0.0   | 0.5   | 0.5   | 0.0   | 0.0   | 0.4   | 0.5   | 0.1   | 25.0  |
| Somalia                            | 52.1  | 54.7  | 2.6   | 5.0   | 57.7  | 47.7  | -10.0 | -17.3 | 69.8  | 40.7  | -29.1 | -41.7 |
| South Africa                       | 63.9  | 65.2  | 1.3   | 2.0   | 83.9  | 39.5  | -44.4 | -52.9 | 58.1  | 55.7  | -2.4  | -4.1  |
| Spain                              | 4.5   | 3.8   | -0.7  | -15.6 | 2.5   | 2.1   | -0.4  | -16.0 | 2.4   | 1.9   | -0.5  | -20.8 |
| Sri Lanka                          | 10.8  | 10.5  | -0.3  | -2.8  | 7.2   | 5.7   | -1.5  | -20.8 | 6.3   | 4.1   | -2.2  | -34.9 |
| Sudan                              | 126.5 | 121.1 | -5.4  | -4.3  | 140.0 | 127.0 | -13.0 | -9.3  | 143.1 | 117.3 | -25.8 | -18.0 |
| Suriname                           | 0.5   | 0.5   | 0.0   | 0.0   | 0.4   | 0.4   | 0.0   | 0.0   | 0.3   | 0.4   | 0.1   | 33.3  |
| Swaziland                          | 3.6   | 2.6   | -1.0  | -27.8 | 3.8   | 3.4   | -0.4  | -10.5 | 2.6   | 3.5   | 0.9   | 34.6  |
| Sweden                             | 0.8   | 0.8   | 0.0   | 0.0   | 0.3   | 0.4   | 0.1   | 33.3  | 0.3   | 0.3   | 0.0   | 0.0   |
| Switzerland                        | 0.6   | 0.7   | 0.1   | 16.7  | 0.4   | 0.4   | 0.0   | 0.0   | 0.4   | 0.3   | -0.1  | -25.0 |
| Syrian Arab Republic               | 16.8  | 15.3  | -1.5  | -8.9  | 10.4  | 8.7   | -1.7  | -16.3 | 7.8   | 5.1   | -2.7  | -34.6 |
| Tajikistan                         | 25.0  | 21.2  | -3.8  | -15.2 | 17.9  | 14.6  | -3.3  | -18.4 | 11.8  | 8.7   | -3.1  | -26.3 |
| Tanzania                           | 165.6 | 167.9 | 2.3   | 1.4   | 173.9 | 172.8 | -1.1  | -0.6  | 133.0 | 151.3 | 18.3  | 13.8  |
| Thailand                           | 34.7  | 24.7  | -10.0 | -28.8 | 16.1  | 13.4  | -2.7  | -16.8 | 10.9  | 8.8   | -2.1  | -19.3 |
| Timor-Leste                        | 4.5   | 3.6   | -0.9  | -20.0 | 3.9   | 3.8   | -0.1  | -2.6  | 2.4   | 2.4   | 0.0   | 0.0   |
| Togo                               | 21.9  | 22.5  | 0.6   | 2.7   | 21.4  | 21.5  | 0.1   | 0.5   | 19.3  | 21.1  | 1.8   | 9.3   |
| Tonga                              | 0.1   | 0.1   | 0.0   | 0.0   | 0.1   | 0.1   | 0.0   | 0.0   | 0.0   | 0.1   | 0.1   | -     |
| Trinidad and Tobago                | 0.9   | 0.8   | -0.1  | -11.1 | 0.6   | 0.6   | 0.0   | 0.0   | 0.5   | 0.5   | 0.0   | 0.0   |
| Tunisia                            | 11.4  | 11.0  | -0.4  | -3.5  | 4.5   | 4.5   | 0.0   | 0.0   | 3.0   | 2.6   | -0.4  | -13.3 |
| Turkey                             | 106.8 | 101.2 | -5.6  | -5.2  | 57.3  | 55.0  | -2.3  | -4.0  | 23.7  | 40.7  | 17.0  | 71.7  |
| Turkmenistan                       | 13.1  | 13.4  | 0.3   | 2.3   | 6.9   | 7.5   | 0.6   | 8.7   | 5.7   | 3.4   | -2.3  | -40.4 |
| Uganda                             | 143.5 | 139.2 | -4.3  | -3.0  | 157.4 | 155.0 | -2.4  | -1.5  | 141.5 | 137.8 | -3.7  | -2.6  |
| UK                                 | 7.1   | 7.4   | 0.3   | 4.2   | 4.6   | 4.4   | -0.2  | -4.3  | 4.3   | 4.1   | -0.2  | -4.7  |
| Ukraine                            | 14.9  | 13.8  | -1.1  | -7.4  | 7.1   | 7.9   | 0.8   | 11.3  | 6.9   | 6.2   | -0.7  | -10.1 |
| United Arab Emirates               | 1.0   | 0.7   | -0.3  | -30.0 | 0.6   | 0.4   | -0.2  | -33.3 | 0.6   | 0.3   | -0.3  | -50.0 |
| Uruguay                            | 1.4   | 1.3   | -0.1  | -7.1  | 0.9   | 0.9   | 0.0   | 0.0   | 0.5   | 0.6   | 0.1   | 20.0  |
| USA                                | 43.9  | 45.3  | 1.4   | 3.2   | 31.8  | 33.0  | 1.2   | 3.8   | 32.3  | 31.5  | -0.8  | -2.5  |
| Uzbekistan                         | 56.1  | 42.2  | -13.9 | -24.8 | 34.9  | 32.0  | -2.9  | -8.3  | 31.5  | 24.3  | -7.2  | -22.9 |
| Vanuatu                            | 0.2   | 0.2   | 0.0   | 0.0   | 0.1   | 0.2   | 0.1   | 100.0 | 0.1   | 0.2   | 0.1   | 100.0 |
| Venezuela (Bolivarian Republic of) | 19.2  | 16.4  | -2.8  | -14.6 | 14.3  | 13.2  | -1.1  | -7.7  | 10.9  | 9.2   | -1.7  | -15.6 |
| Viet Nam                           | 98.7  | 85.0  | -13.7 | -13.9 | 42.1  | 34.0  | -8.1  | -19.2 | 34.5  | 16.0  | -18.5 | -53.6 |
| Yemen                              | 74.6  | 75.4  | 0.8   | 1.1   | 68.4  | 68.3  | -0.1  | -0.1  | 68.7  | 52.8  | -15.9 | -23.1 |
| Zambia                             | 60.2  | 56.9  | -3.3  | -5.5  | 67.9  | 63.5  | -4.4  | -6.5  | 60.3  | 65.0  | 4.7   | 7.8   |
| Zimbabwe                           | 29.2  | 28.2  | -1.0  | -3.4  | 42.8  | 28.3  | -14.5 | -33.9 | 29.1  | 26.7  | -2.4  | -8.2  |
